# Supplementary material for: Theoretical study of the BINOL–zinc complex-catalyzed asymmetric inverse-electron-demand imino Diels–Alder reaction: mechanism and stereochemistry
Source: Royal Society of Chemistry journal article supplement (doi:10.1039/c5ra17981e), 2015-01-01
Supplement: c5ra17981e1.pdf [file c5ra17981e1.pdf]

## Supporting Information

### Theoretical Study on the BINOL-Zinc Complex-Catalyzed Asymmetric Inverse-Electron-Demand Imino Diels-Alder Reaction: Mechanism and Stereochemistry

*Weiyi Li*<sup>\*a</sup> *Na Yang*<sup>b</sup> and *Yajing Lv*<sup>a</sup>

<sup>a</sup> School of Science, Xihua University, Chengdu, Sichuan, 610039, P. R. China.

<sup>b</sup> Institute of Nuclear Physics and Chemistry, China Academy of Engineering Physics, Mianyang,  
621900, P. R. China

E-mail: weiyili@mail.xhu.edu.cn ; Fax:+86-028-87727663; Tel: +86-028-87727663

#### CONTENTS:

|                                                                                        |     |
|----------------------------------------------------------------------------------------|-----|
| S1 Computational details.....                                                          | 4   |
| S2 Background reaction without catalyst.....                                           | 4   |
| S3 Catalytic reaction mechanism.....                                                   | 8   |
| S4 Stereochemistry in the presence of BINOL-Zn complex.....                            | 21  |
| S5 Cartesian coordinate, frequency and energy information of optimized-structures..... | 28  |
| S6: Reference 24 details.....                                                          | 286 |

## S1: Computational details.

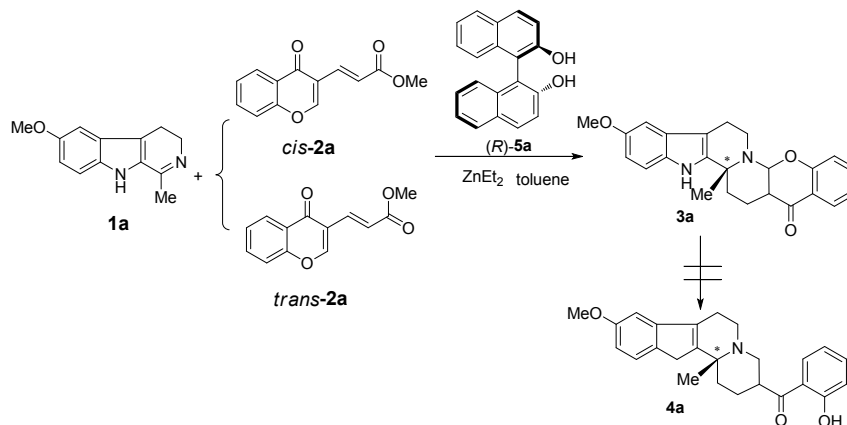

Optimization and frequent calculation in gas phase: M05-2X/6-31G(d)

Solvation Method: M05-2X(SMD, toluene)/6-311+G(d,p)

For single-point energy calculation, the SCRF=Read keyword was used.

## S2 Background reaction without catalyst.

2.1 The background reaction of imine **1a** with diene *cis*-**2a**

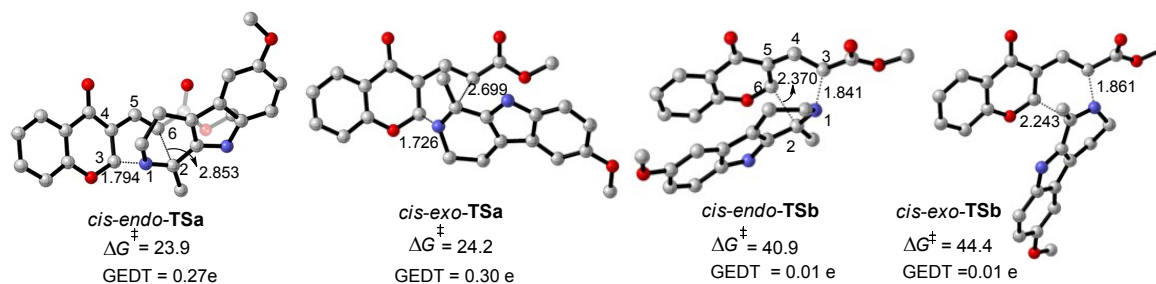

**Figure S1.** The M05-2X/6-31G(d)-optimized transition states structures for the IEDIDA reaction of **1a** and *cis*-**2a** (the forming bond distances are labeled in Å, the activation free energies are given in kcal mol<sup>-1</sup>).

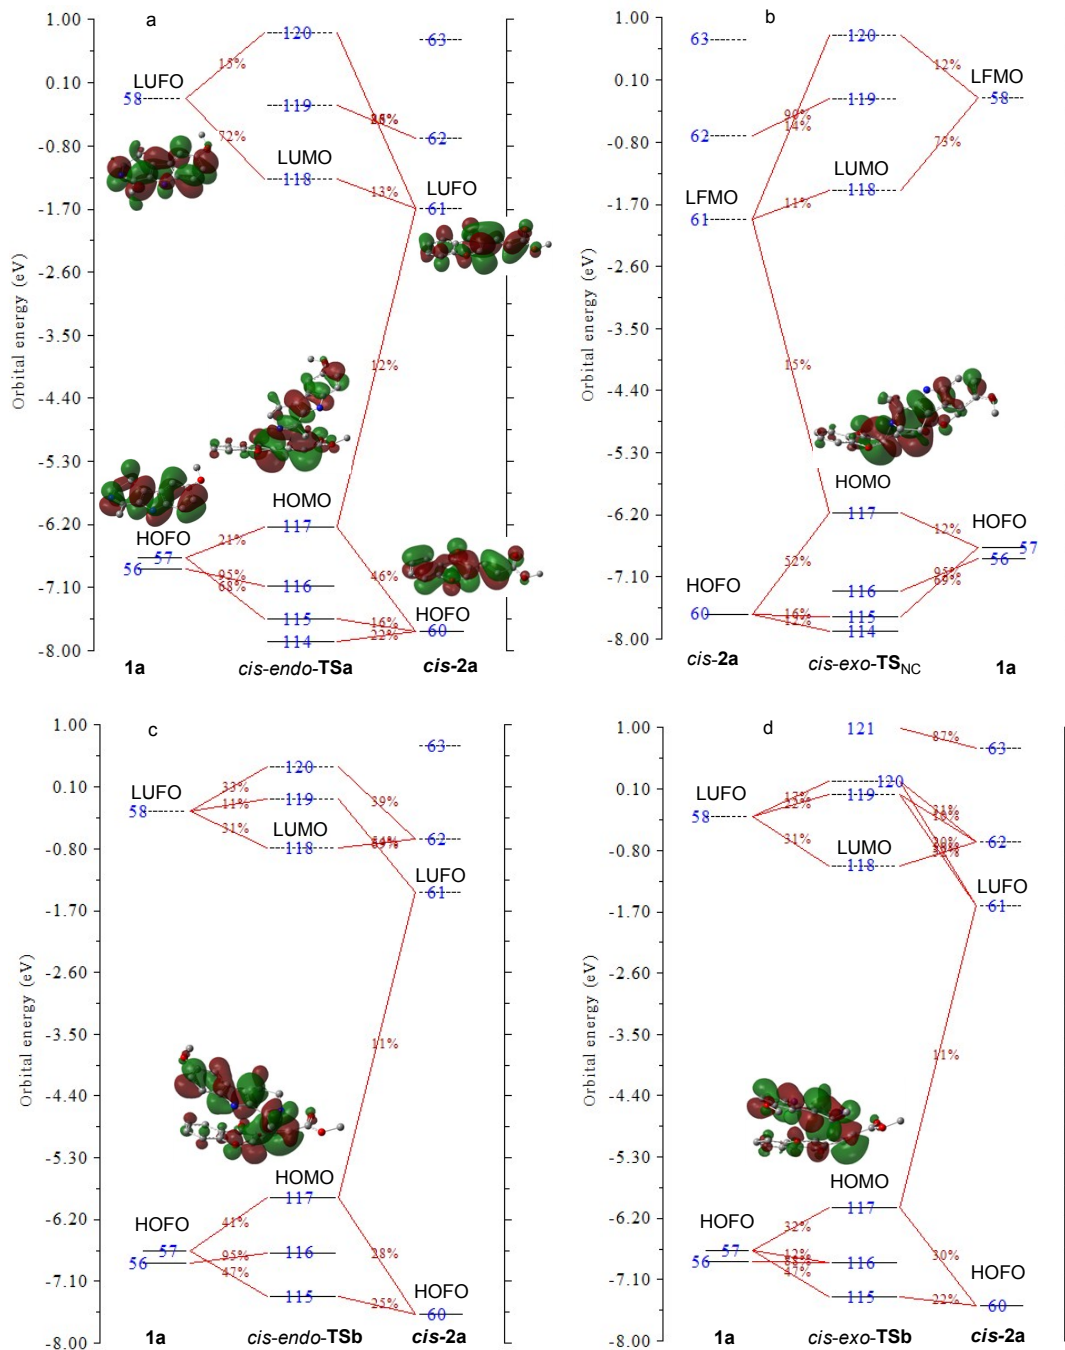

**Figure S2.** Orbital interaction diagrams for the four transition states from **1a** and *cis-2a* fragments (only  $\alpha$ -spin orbitals presented).

**Table S1** Activation barriers ( $\Delta E^\ddagger$ ,  $\Delta H^\ddagger$ ,  $\Delta G^\ddagger$ ), reaction energies ( $\Delta G_{\text{rxn}}$ ), distortion and interaction energies (all in kcal mol<sup>-1</sup>), relative entropy (kcal mol<sup>-1</sup> K<sup>-1</sup>) and charge transfer (in e) for the transition states in uncatalyzed IEDIDA reaction of **1a** and *cis*-**2a**.

| Structures                   | $\Delta E_{\text{dist}}^\ddagger$ <sup>a</sup> |                |       | $\Delta E_{\text{int}}^\ddagger$ <sup>b</sup> | $\Delta E^\ddagger$ <sup>c</sup> | $\Delta H^\ddagger$ <sup>d</sup> | $\Delta S^\ddagger$ <sup>e</sup> | $\Delta G^\ddagger$ <sup>f</sup> | $\Delta G_{\text{rxn}}$ <sup>g</sup> | GEDT <sup>h</sup> |
|------------------------------|------------------------------------------------|----------------|-------|-----------------------------------------------|----------------------------------|----------------------------------|----------------------------------|----------------------------------|--------------------------------------|-------------------|
|                              | 1a                                             | <i>cis</i> -2a | total |                                               |                                  |                                  |                                  |                                  |                                      |                   |
| <i>cis</i> -endo-TS <b>a</b> | 4.5                                            | 18.6           | 23.1  | -14.2                                         | 8.8                              | 8.3                              | -0.052                           | 23.9                             | -2.1                                 | 0.27              |
| <i>cis</i> -exo-TS <b>a</b>  | 3.9                                            | 27.3           | 31.2  | -21.6                                         | 8.4                              | 7.6                              | -0.050                           | 24.4                             | -3.4                                 | 0.30              |
| <i>cis</i> -endo-TS <b>b</b> | 8.7                                            | 19.9           | 28.7  | -3.5                                          | 19.7                             | 24.5                             | -0.055                           | 40.9                             | 9.4                                  | 0.01              |
| <i>cis</i> -exo-TS <b>b</b>  | 10.1                                           | 26.2           | 36.3  | -7.0                                          | 24.5                             | 28.6                             | -0.053                           | 44.4                             | 2.3                                  | 0.01              |

*a*:  $\Delta E_{\text{dist}}^\ddagger$  is the energy to distort the 1a or *cis*-2a into the transition state;

*b*:  $\Delta E_{\text{int}}^\ddagger$  is the interaction energy of the two fragments decomposed from the transition state ( $\Delta E_{\text{int}}^\ddagger = \Delta E^\ddagger - \Delta E_{\text{dist}}^\ddagger$ );

*c*:  $\Delta E^\ddagger$  is the activation energy [ $\Delta E^\ddagger = E(\text{TS}) - E(1a) - E(\textit{cis}\text{-}2a)$ ], election energy  $E = E_c + E_{\text{sol}}$ ,  $E_c$  is the zero-point correction in gas phase,  $E_{\text{sol}}$  is the electron energy in solvent after PCM correction;

*d*:  $\Delta H^\ddagger$  is the activation enthalpy [ $\Delta H^\ddagger = H(\text{TS}) - H(1a) - H(\textit{cis}\text{-}2a)$ ],  $H = H_c + E_{\text{sol}}$ ,  $H_c$  is thermal correction to enthalpy in gas phase;

*e*:  $\Delta S^\ddagger$  is the change of entropy [ $\Delta S^\ddagger = S(\text{TS}) - S(1a) - S(\textit{cis}\text{-}2a)$ ],  $S$  is the entropy in gas phase;

*f*:  $\Delta G^\ddagger$  is the activation Gibbs free energy [ $\Delta G^\ddagger = G(\text{TS}) - G(1a) - G(\textit{cis}\text{-}2a)$ ],  $G = G_c + E_{\text{sol}}$ ,  $G_c$  is thermal correction to Gibbs Free Energy in gas phase;

*g*:  $\Delta G_{\text{rxn}}$  is reaction free energy [ $\Delta G_{\text{rxn}} = G(\textit{cis}\text{-}4a/5a) - G(1a) - G(\textit{cis}\text{-}2a)$ ];

*h*: GEDT is the global electron density transfer from nucleophilic 1a fragment to electrophilic *cis*-2 fragment.

## 2.2 The background reaction of imine 1a with diene *trans*-2a

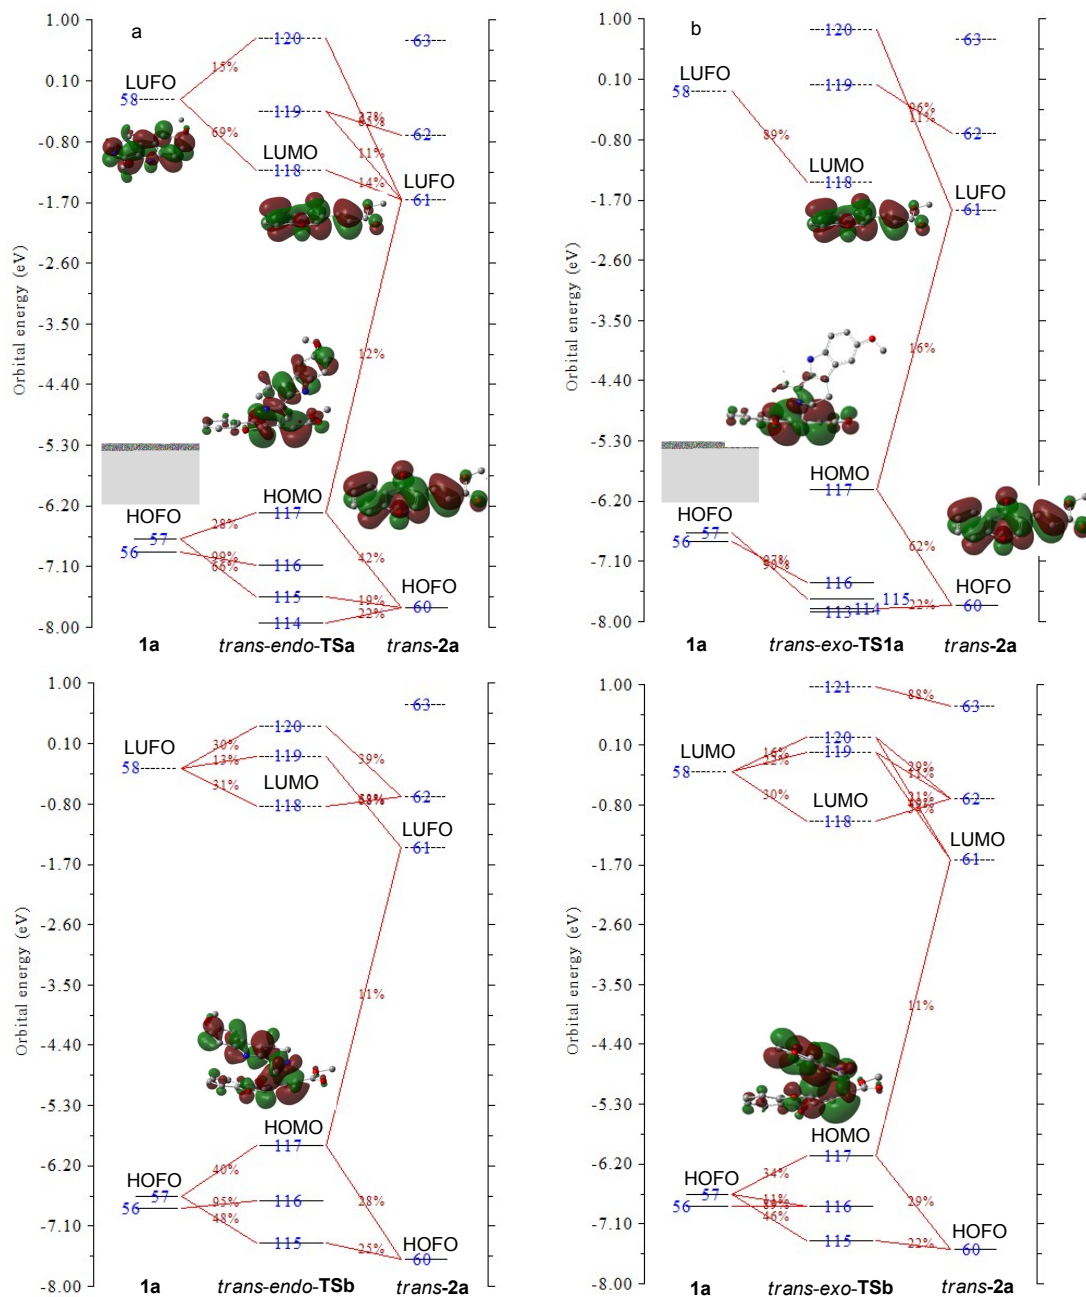

**Figure S3.** Orbital interaction diagrams for the four transition states from **1a** and *trans*-**2a** fragments (only  $\alpha$ -spin orbitals presented).

**Table S2** Activation barriers ( $\Delta E^\ddagger$ ,  $\Delta H^\ddagger$ ,  $\Delta G^\ddagger$ ), reaction energies ( $\Delta G_{\text{rxn}}$ ), distortion and interaction energies (all in kcal mol<sup>-1</sup>), relative entropy (kcal mol<sup>-1</sup> K<sup>-1</sup>) and charge transfer (in e) for the transition states in uncatalyzed IEDIDA reaction of **1a** and *trans*-**2a**.

| Structures                     | $\Delta E_{\text{dist}}^\ddagger$ |      |       | $\Delta E_{\text{int}}^\ddagger$ | $\Delta E^\ddagger$ | $\Delta H^\ddagger$ | $\Delta S^\ddagger$ | $\Delta G^\ddagger$ | $\Delta G_{\text{rxn}}$ | GEDT |
|--------------------------------|-----------------------------------|------|-------|----------------------------------|---------------------|---------------------|---------------------|---------------------|-------------------------|------|
|                                | 1a                                | 2a   | total |                                  |                     |                     |                     |                     |                         |      |
| <i>trans-endo</i> - <b>TSa</b> | 4.5                               | 18.5 | 23.0  | -14.6                            | 8.4                 | 7.6                 | -0.056              | 24.4                | -5.6                    | 0.24 |
| <i>trans-exo</i> - <b>TS1a</b> | 4.4                               | 18.6 | 22.9  | -16.0                            | 6.9                 | 6.5                 | -0.050              | 21.4                | -                       | 0.39 |
| <i>trans-exo</i> - <b>TS2a</b> | 6.7                               | 34.5 | 41.2  | -29.6                            | 11.6                | 10.9                | -0.054              | 26.9                | -7.4                    | 0.38 |
| <i>trans-endo</i> - <b>TSb</b> | 8.6                               | 20.2 | 28.8  | -3.0                             | 25.8                | 25.3                | -0.057              | 42.0                | 14.2                    | 0.01 |
| <i>trans-exo</i> - <b>TSb</b>  | 10.0                              | 25.9 | 36.0  | -7.3                             | 28.6                | 27.9                | -0.053              | 43.9                | 4.3                     | 0.01 |

### S3 Catalytic reaction mechanism

3.1 The IEDIDA reaction of imine **1a** with diene *cis*-**2a** catalyzed by ZnCl<sub>2</sub>

Model I and II: the cycloaddition of the activated **1a** with diene *cis*-**2a**

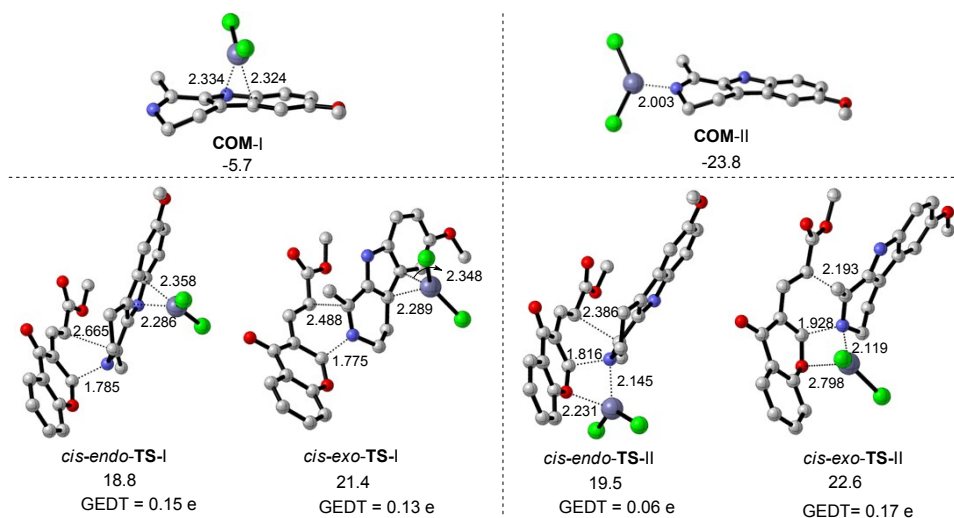

**Figure S4.** The M05-2X/6-31G(d)-optimized **1a**-ZnCl<sub>2</sub> complexes and transition states in the cycloaddition of **1a**-ZnCl<sub>2</sub> complexes with diene *cis*-**2a** (the bond distances are labeled in Å and the relative Gibbs free energies are given in kcal mol<sup>-1</sup>).

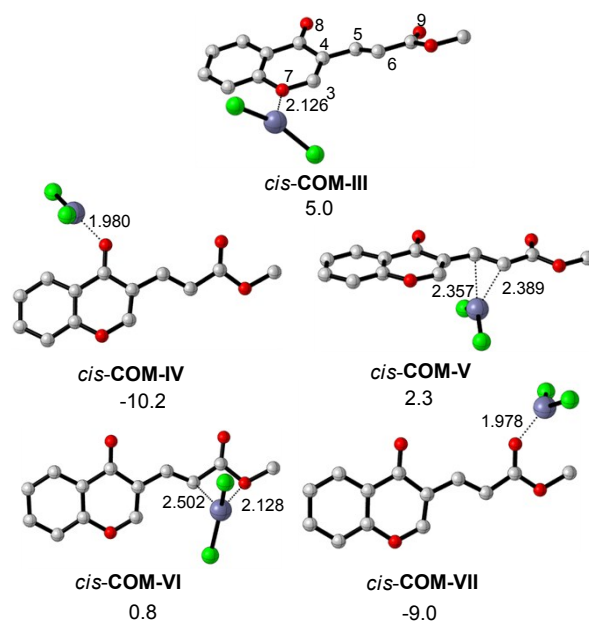

**Figure S5.** The M05-2X/6-31G(d)-optimized *cis-2a*-ZnCl<sub>2</sub> complexes (the bond distances are labeled in Å and the relative Gibbs free energies are given in kcal mol<sup>-1</sup>).

**Table S3** Electronic chemical potential  $\mu$ , chemical hardness  $\eta$ , global electrophilicity  $\omega$ , global nucleophilicity  $N$ , electrophilic Parr function  $P_k^+$ , local electrophilicity  $\omega_k$ , electrophilic Parr function  $P_k^-$  and local nucleophilicity  $N_k$  indices for **1a**, *cis-2a* and molecular complexes.

| Species            | $\mu$<br>[ eV ] | $\eta$<br>[ eV ] | $\omega$<br>[ eV ] | $\omega$<br>[ eV ] | $P_k^+$ |       | $\omega_k$ [ eV ] |     | $P_k^-$ |      | $N_k$ [ eV ] |     |
|--------------------|-----------------|------------------|--------------------|--------------------|---------|-------|-------------------|-----|---------|------|--------------|-----|
|                    |                 |                  |                    |                    | C3      | C6    | C3                | C6  | N1      | C2   | N1           | C2  |
| <b>1a</b>          | -3.7            | 0.24             | 1.0                | 4.0                | -       | -     | -                 | -   | 0.27    | 0.13 | 1.1          | 0.5 |
| <b>COM-I</b>       | -4.7            | 0.25             | 1.6                | 3.0                | -       | -     | -                 | -   | 0.27    | 0.03 | 1.0          | 0.3 |
| <b>COM-II</b>      | -4.8            | 0.22             | 1.9                | 3.2                | -       | -     | -                 | -   | 0.21    | 0.36 | 0.7          | 1.2 |
| <i>cis-2a</i>      | -4.7            | 7.0              | 1.6                | 2.8                | 0.57    | 0.10  | 0.9               | 0.2 | -       | -    | -            | -   |
| <i>cis-COM-III</i> | -5.2            | 7.4              | 2.1                | 2.1                | 0.50    | 0.06  | 1.1               | 0.1 | -       | -    | -            | -   |
| <i>cis-COM-IV</i>  | -5.7            | 6.7              | 2.4                | 2.0                | 0.42    | -0.01 | 1.0               | 0.0 | -       | -    | -            | -   |
| <i>cis-COM-V</i>   | -5.7            | 6.5              | 2.5                | 2.1                | 0.50    | 0.22  | 1.3               | 0.6 | -       | -    | -            | -   |
| <i>cis-COM-VI</i>  | -5.4            | 6.6              | 2.2                | 2.3                | 0.44    | 0.09  | 1.0               | 0.2 | -       | -    | -            | -   |
| <i>cis-COM-VII</i> | -5.5            | 6.6              | 2.3                | 2.2                | 0.43    | 0.07  | 1.0               | 0.2 | -       | -    | -            | -   |

Model III: the cycloaddition of the complex *cis*-COM-III with **1a** undergoes a one-step concerted mechanism

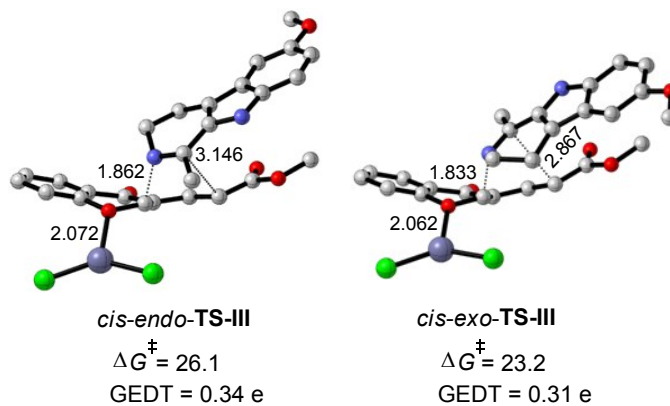

**Figure S6.** The M05-2X/6-31G(d)-optimized transition states in the cycloaddition of the complex *cis*-COM-III with **1a** (the bond distances are labeled in Å and the relative Gibbs free energies are given in kcal mol<sup>-1</sup>).



Model IV: the cycloaddition of the complex *cis*-COM-IV with **1a** undergoes a two-step stepwise mechanism

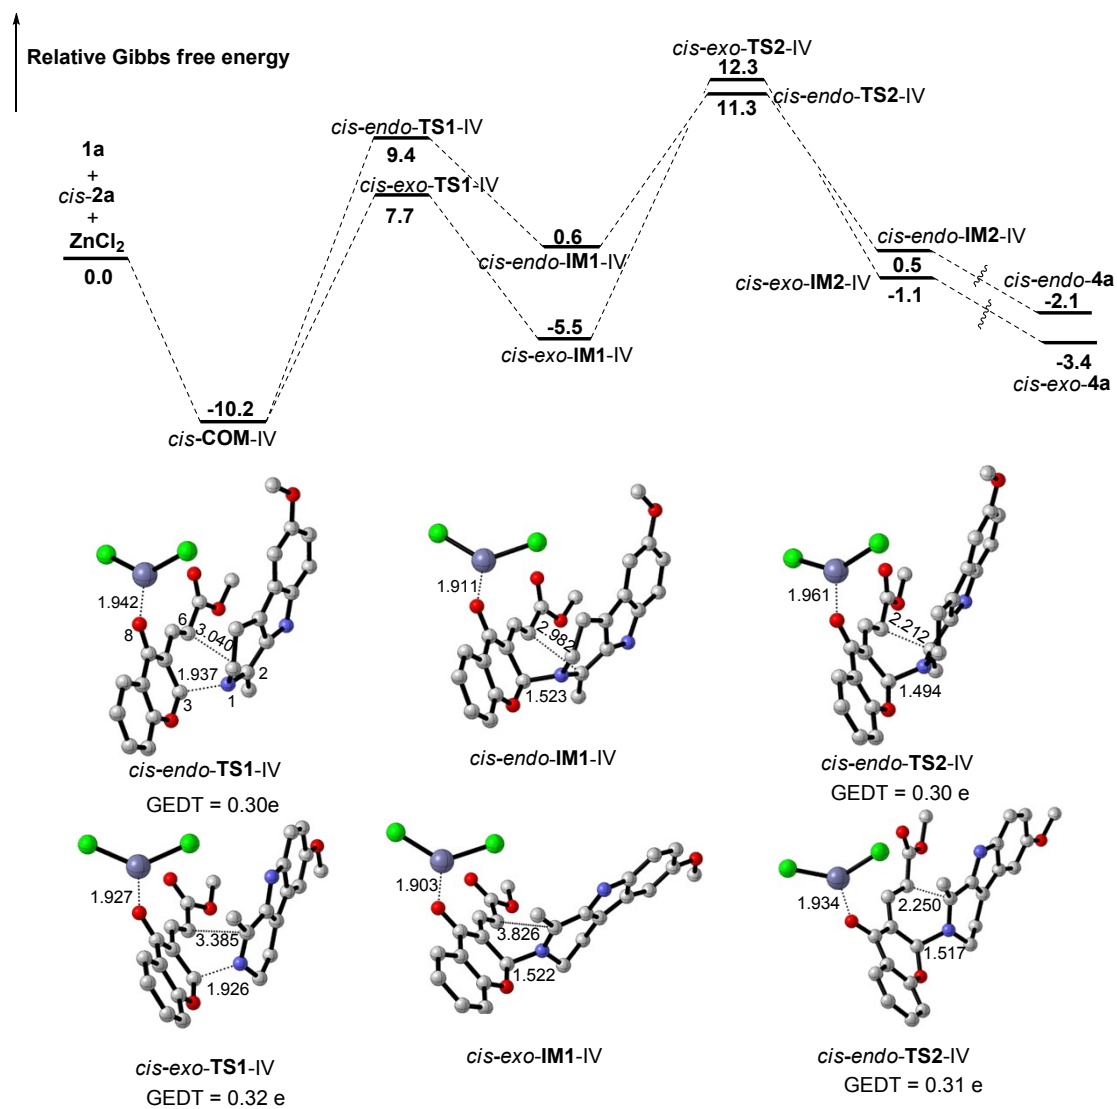

**Figure S7.** The free energy profile (in kcal mol<sup>-1</sup>) of the cycloaddition reaction of the complex *cis*-COM-IV and **1a**, with the M05-2X/6-31G(d)-optimized transition states and intermediates shown below (the forming bond distances are labeled in Å).

Model V: the cycloaddition of the complex *cis*-COM-V with **1a** undergoes a two-step stepwise mechanism

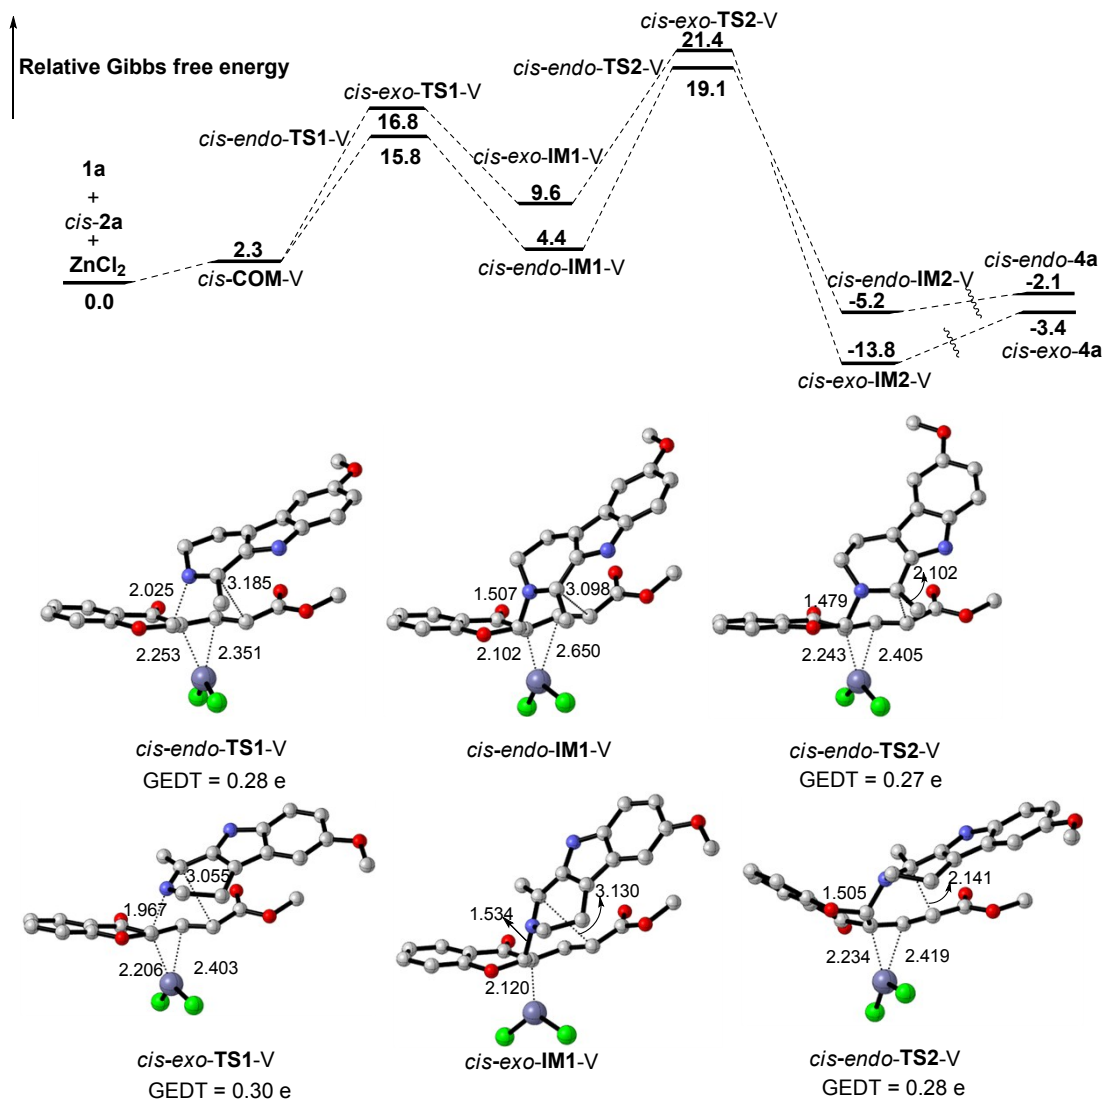

**Figure S8.** The free energy profile (in kcal mol<sup>-1</sup>) of the cycloaddition reaction of the complex *cis*-COM-V and **1a**, with the M05-2X/6-31G(d)-optimized transition states and intermediates shown below (the forming bond distances are labeled in Å).

Model VI: the cycloaddition of the complex *cis*-COM-VI with **1a** undergoes a two-step stepwise mechanism

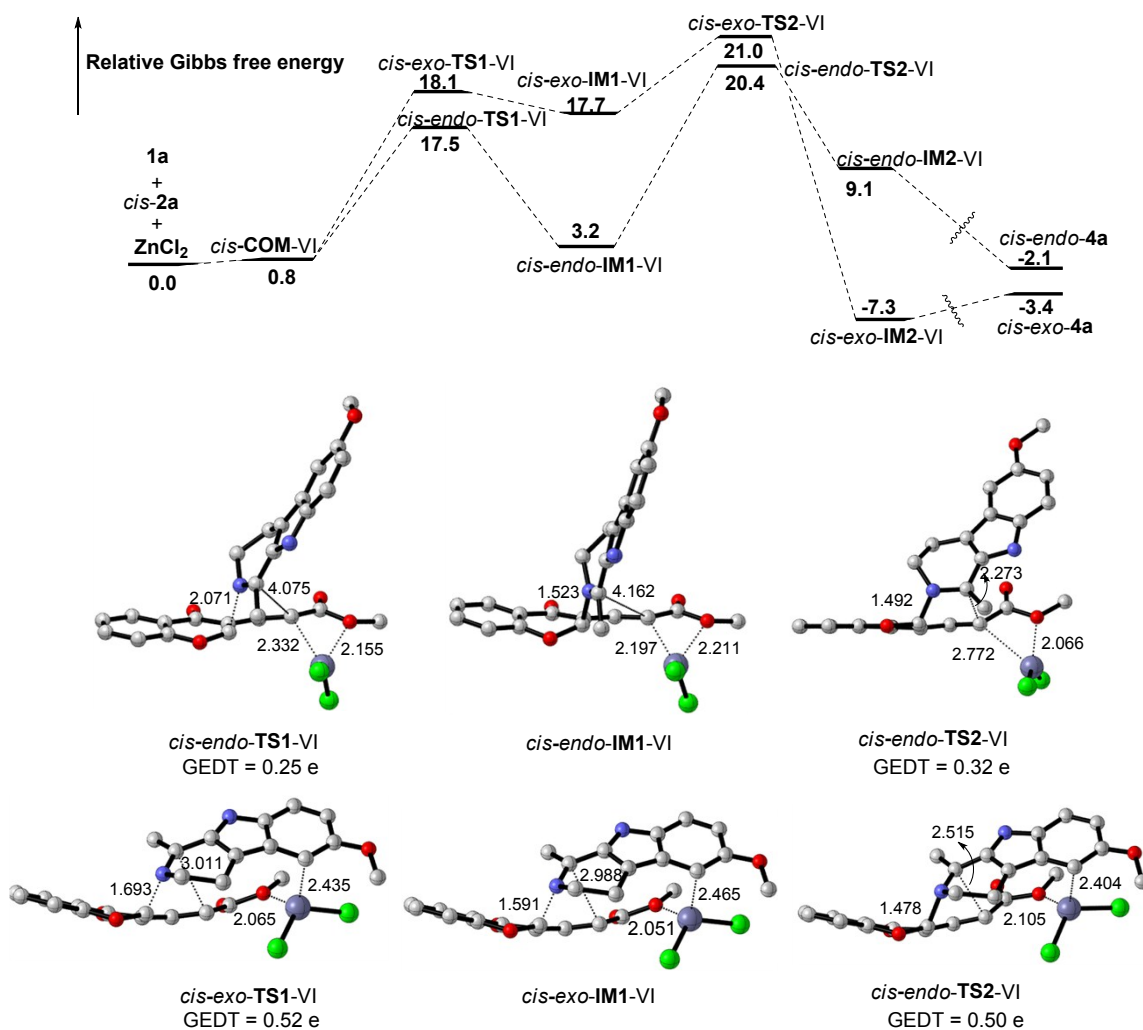

**Figure S9.** The free energy profile (in kcal mol<sup>-1</sup>) of the cycloaddition reaction of the complex *cis*-COM-VI and **1a**, with the M05-2X/6-31G(d)-optimized transition states and intermediates shown below (the forming bond distances are labeled in Å).

Model VII: the cycloaddition of the complex *cis*-COM-VI with **1a**, the endo approach undergoes a one-step concerted mechanism, while the exo approach undergoes a two-step stepwise mechanism

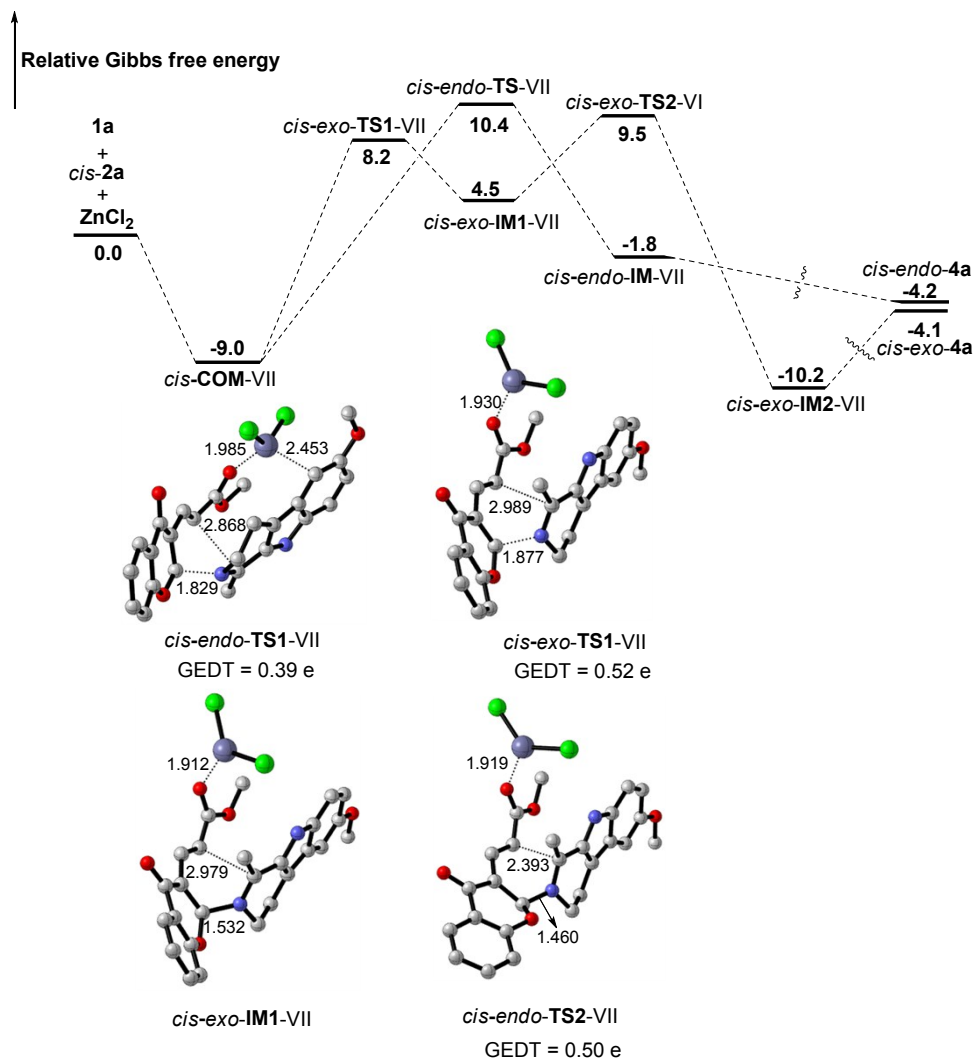

**Figure S10.** The free energy profile (in kcal mol<sup>-1</sup>) of the cycloaddition reaction of the complex *cis*-COM-VII and **1a**, with the M05-2X/6-31G(d)-optimized transition states and intermediates shown below (the forming bond distances are labeled in Å).

**Table S4** Activation barriers ( $\Delta E^\ddagger$ ,  $\Delta H^\ddagger$ ,  $\Delta G^\ddagger$ ), reaction energies ( $\Delta G_{\text{rxn}}$ ), distortion and interaction energies (all in kcal mol<sup>-1</sup>), relative entropy (kcal mol<sup>-1</sup> K<sup>-1</sup>) and charge transfer (in e) for the transition states in ZnCl<sub>2</sub>-catalyzed IEDIDA reaction of **1a** and *cis*-

| Structures              | $\Delta E_{\text{dist}}^\ddagger$ |                        |                   |       | $\Delta E_{\text{int}}^\ddagger$ | $\Delta E^\ddagger$ | $\Delta H^\ddagger$ | $\Delta S^\ddagger$ | $\Delta G^\ddagger$ | GEDT |
|-------------------------|-----------------------------------|------------------------|-------------------|-------|----------------------------------|---------------------|---------------------|---------------------|---------------------|------|
|                         | <b>1a</b>                         | <i>cis</i> - <b>2a</b> | ZnCl <sub>2</sub> | total |                                  |                     |                     |                     |                     |      |
| <i>cis</i> -endo-TS-I   | 7.0                               | 19.0                   | 7.0               | 31.3  | -32.6                            | -4.4                | -4.8                | -0.079              | 18.8                | 0.15 |
| <i>cis</i> -exo-TS-I    | 6.4                               | 25.9                   | 3.6               | 35.9  | -37.9                            | -1.9                | -2.3                | -0.079              | 21.4                | 0.13 |
| <i>cis</i> -endo-TS-II  | 11.2                              | 25.6                   | 4.2               | 41.0  | -49.8                            | -4.4                | -4.9                | -0.082              | 19.5                | 0.06 |
| <i>cis</i> -exo-TS-II   | 14.7                              | 27.9                   | 7.2               | 49.8  | -51.9                            | -2.1                | -2.7                | -0.085              | 22.6                | 0.17 |
| <i>cis</i> -endo-TS-III | 1.8                               | 20.1                   | 2.6               | 24.5  | -21.0                            | 3.5                 | 3.4                 | -0.076              | 26.1                | 0.34 |
| <i>cis</i> -exo-TS-III  | 2.5                               | 23.9                   | 2.7               | 29.1  | -28.2                            | 0.9                 | 0.8                 | -0.075              | 23.2                | 0.31 |
| <i>cis</i> -endo-TS1-IV | 3.0                               | 15.5                   | 3.8               | 22.3  | -36.0                            | -13.7               | -14.2               | -0.079              | 9.4                 | 0.30 |
| <i>cis</i> -endo-TS2-IV | 16.4                              | 51.1                   | 3.0               | 70.5  | -82.2                            | -11.7               | -12.2               | -0.079              | 11.3                | 0.30 |
| <i>cis</i> -exo-TS1-IV  | 5.2                               | 16.5                   | 4.8               | 26.5  | -40.5                            | -14.0               | -14.1               | -0.073              | 7.7                 | 0.32 |
| <i>cis</i> -exo-TS2-IV  | 14.9                              | 49.5                   | 3.3               | 67.6  | -77.6                            | -10.0               | -10.6               | -0.077              | 12.3                | 0.31 |
| <i>cis</i> -endo-TS1-V  | 1.6                               | 12.9                   | 3.3               | 17.8  | -24.2                            | -6.4                | -6.2                | -0.074              | 15.8                | 0.28 |
| <i>cis</i> -endo-TS2-V  | 17.9                              | 55.0                   | 3.4               | 76.4  | -80.6                            | -4.2                | -4.8                | -0.080              | 19.1                | 0.27 |
| <i>cis</i> -exo-TS1-V   | 1.7                               | 16.3                   | 3.6               | 21.6  | -26.5                            | -4.9                | -4.9                | -0.073              | 16.8                | 0.30 |
| <i>cis</i> -exo-TS2-V   | 16.6                              | 53.2                   | 3.9               | 73.7  | -75.9                            | -1.8                | -2.4                | -0.080              | 21.4                | 0.28 |
| <i>cis</i> -endo-TS1-VI | 0.7                               | 13.0                   | 3.1               | 16.9  | -19.9                            | -3.0                | -2.7                | -0.068              | 17.5                | 0.25 |
| <i>cis</i> -endo-TS2-VI | 13.5                              | 54.8                   | 2.0               | 70.2  | -72.6                            | -2.4                | -3.0                | -0.078              | 20.4                | 0.32 |
| <i>cis</i> -exo-TS1-VI  | 6.4                               | 30.1                   | 7.3               | 43.8  | -50.2                            | -6.3                | -6.9                | -0.084              | 18.1                | 0.51 |
| <i>cis</i> -exo-TS2-VI  | 12.8                              | 67.8                   | 3.3               | 83.8  | -88.5                            | -4.7                | -5.9                | -0.090              | 21.0                | 0.50 |
| <i>cis</i> -endo-TS-VII | 2.8                               | 20.9                   | 4.8               | 28.6  | -42.7                            | -14.1               | -14.5               | -0.084              | 10.4                | 0.39 |
| <i>cis</i> -exo-TS1-VII | 2.9                               | 21.6                   | 4.4               | 28.9  | -43.6                            | -14.8               | -15.2               | -0.078              | 8.2                 | 0.31 |
| <i>cis</i> -exo-TS2-VII | 10.9                              | 87.2                   | 4.7               | 102.9 | -117.1                           | -14.3               | -15.0               | -0.082              | 9.5                 | 0.41 |

**2a.**

### 3.2 The IEDIDA reaction of imine 1a with diene *trans*-2a catalyzed by ZnCl<sub>2</sub>

Model III: the cycloaddition of the complex *trans*-COM-III with **1a**, the endo approach undergoes a one-step concerted mechanism, while the exo approach undergoes a two-step stepwise mechanism

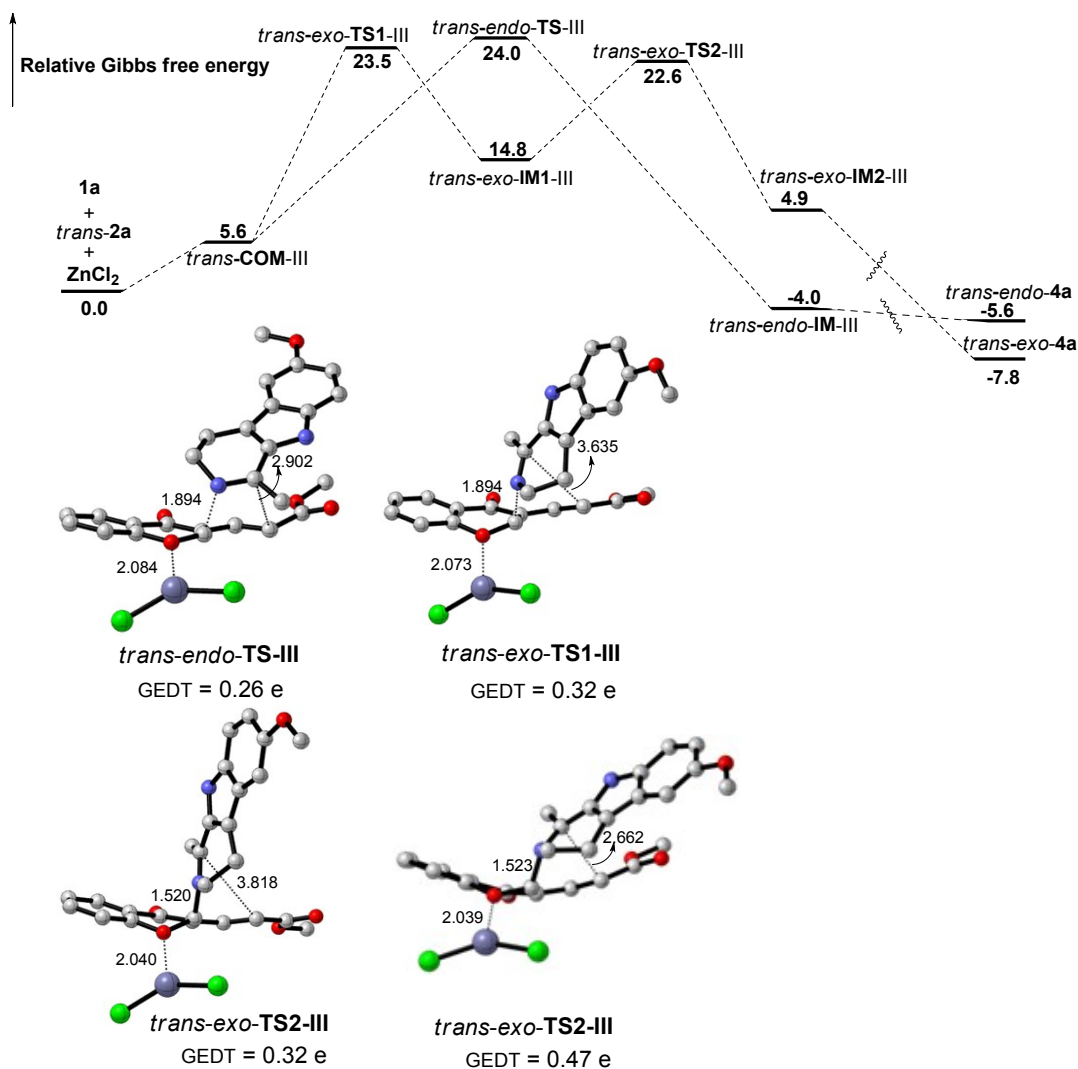

**Figure S11.** The M05-2X/6-31G(d)-optimized transition states in the cycloaddition of the complex *cis*-COM-III with **1a** (the bond distances are labeled in Å and the relative Gibbs free energies are given in kcal mol<sup>-1</sup>).

Model IV: the cycloaddition of the complex *trans*-COM-IV with **1a** undergoes a two-step stepwise mechanism

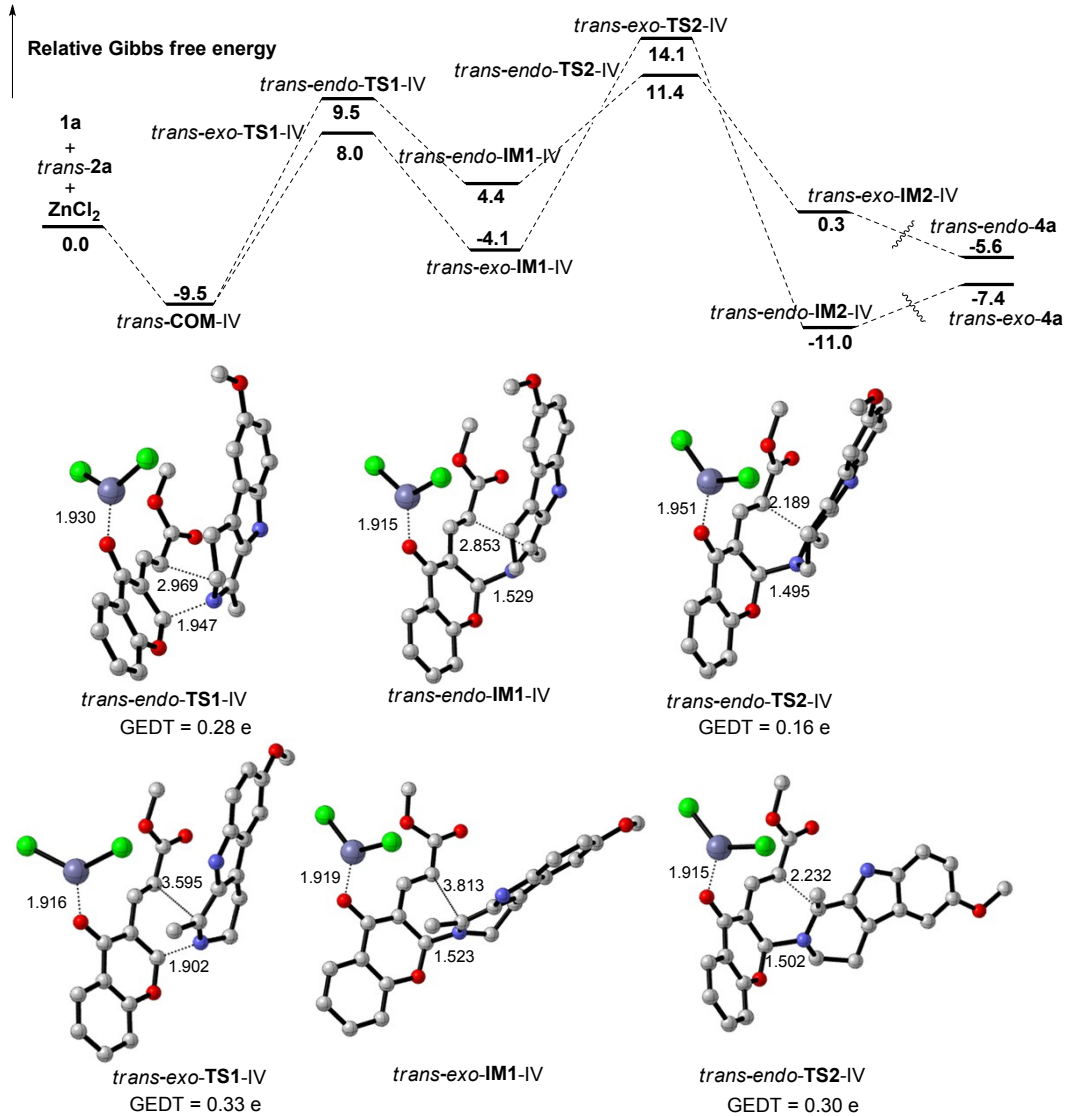

**Figure S12.** The free energy profile (in kcal mol<sup>-1</sup>) of the cycloaddition reaction of the complex *trans*-COM-IV and **1a**, with the M05-2X/6-31G(d)-optimized transition states and intermediates shown below (the forming bond distances are labeled in Å).

Model V: the cycloaddition of the complex *trans*-COM-V with **1a** undergoes a two-step stepwise mechanism

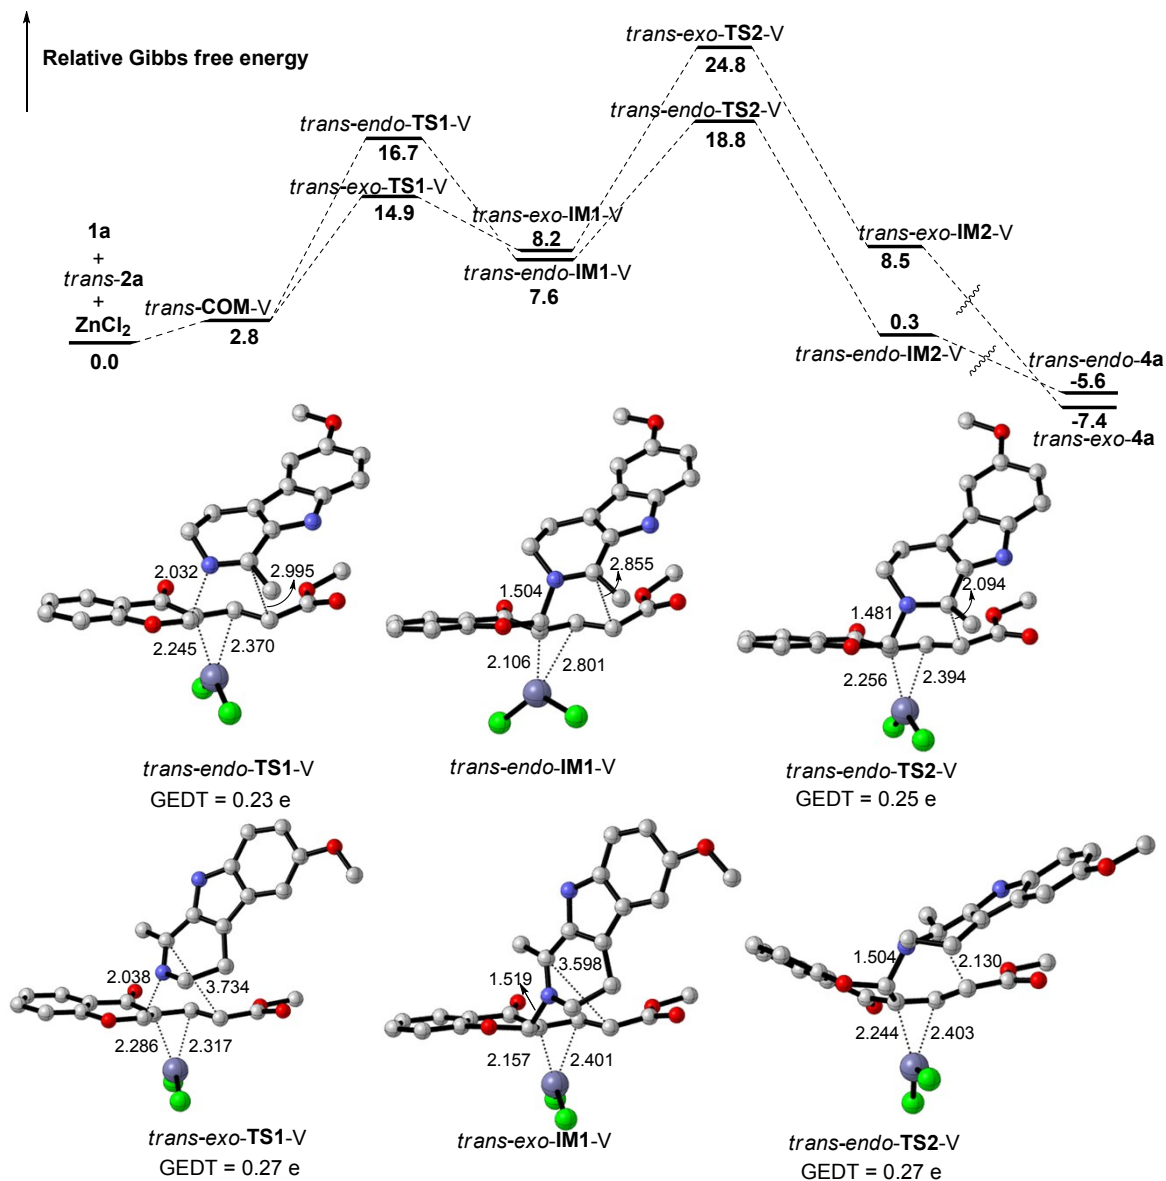

**Figure S13.** The free energy profile (in kcal mol<sup>-1</sup>) of the cycloaddition reaction of the complex *trans*-COM-V and **1a**, with the M05-2X/6-31G(d)-optimized transition states and intermediates shown below (the forming bond distances are labeled in Å).



Model VI: the cycloaddition of the complex *trans*-COM-VI with **1a** undergoes a two-step stepwise mechanism

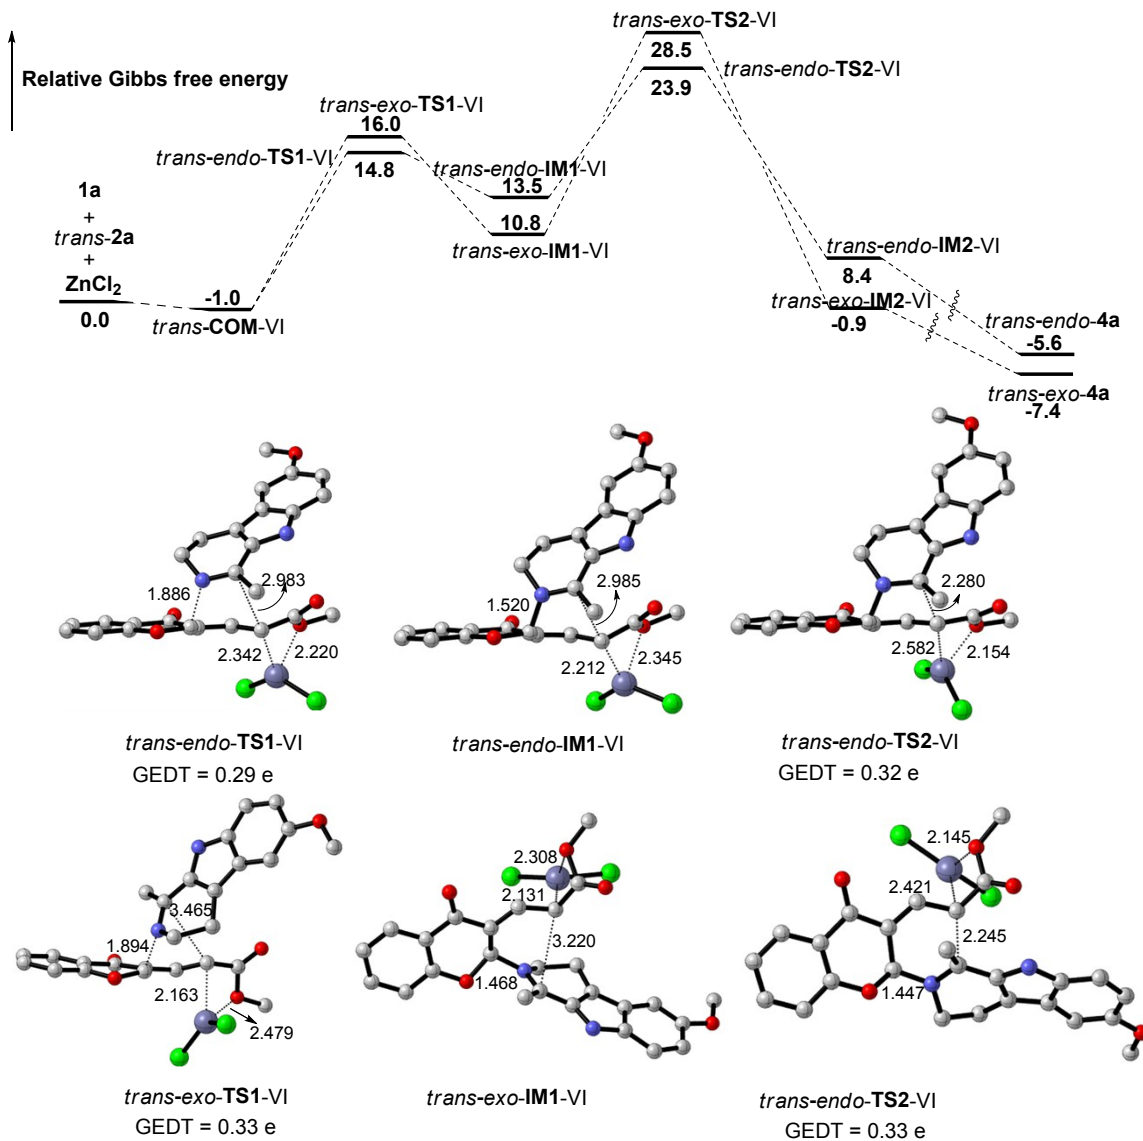

**Figure S14.** The free energy profile (in kcal mol<sup>-1</sup>) of the cycloaddition reaction of the complex *trans*-COM-VI and **1a**, with the M05-2X/6-31G(d)-optimized transition states and intermediates shown below (the forming bond distances are labeled in Å).

**Table S5** Activation barriers ( $\Delta E^\ddagger$ ,  $\Delta H^\ddagger$ ,  $\Delta G^\ddagger$ ), reaction energies ( $\Delta G_{\text{rxn}}$ ), distortion and interaction energies (all in kcal mol<sup>-1</sup>), relative entropy (kcal mol<sup>-1</sup> K<sup>-1</sup>) and charge transfer (in e) for the transition states in ZnCl<sub>2</sub>-catalyzed IEDIDA reaction of **1a** and *trans*-**2a**.

| Structures                 | $\Delta E_{\text{dist}}^\ddagger$ |                          |                   |       | $\Delta E_{\text{int}}^\ddagger$ | $\Delta E^\ddagger$ | $\Delta H^\ddagger$ | $\Delta S^\ddagger$ | $\Delta G^\ddagger$ | GEDT |
|----------------------------|-----------------------------------|--------------------------|-------------------|-------|----------------------------------|---------------------|---------------------|---------------------|---------------------|------|
|                            | <b>1a</b>                         | <i>trans</i> - <b>2a</b> | ZnCl <sub>2</sub> | total |                                  |                     |                     |                     |                     |      |
| <i>trans-endo</i> -TS-I    | 5.9                               | 19.9                     | 3.5               | 28.6  | -33.3                            | -4.8                | -5.1                | -0.079              | 18.6                | 0.14 |
| <i>trans-exo</i> -TS-I     | 6.2                               | 26.3                     | 3.6               | 36.1  | -36.8                            | -0.7                | -1.1                | -0.078              | 22.2                | 0.16 |
| <i>trans-endo</i> -TS-II   | 12.0                              | 25.8                     | 4.1               | 42.0  | -47.6                            | -5.6                | -6.6                | -0.088              | 19.7                | 0.05 |
| <i>trans-exo</i> -TS-II    | 14.8                              | 28.8                     | 7.3               | 50.8  | -50.1                            | 0.7                 | 0.1                 | -0.085              | 25.4                | 0.15 |
| <i>trans-endo</i> -TS-III  | 3.5                               | 17.8                     | 2.5               | 23.8  | -22.6                            | 1.2                 | 1.0                 | -0.077              | 24.0                | 0.26 |
| <i>trans-exo</i> -TS1-III  | 2.1                               | 15.1                     | 2.1               | 19.3  | -17.3                            | 2.0                 | 1.8                 | -0.073              | 23.5                | 0.32 |
| <i>trans-exo</i> -TS2-III  | 7.4                               | 45.0                     | 2.4               | 54.8  | -54.8                            | 0.0                 | -0.4                | -0.077              | 22.6                | 0.47 |
| <i>trans-endo</i> -TS1-IV  | 3.9                               | 15.9                     | 5.0               | 24.8  | -38.8                            | -14.0               | -14.3               | -0.080              | 9.5                 | 0.28 |
| <i>trans-endo</i> -TS2-IV  | 18.8                              | 71.9                     | 5.7               | 96.4  | -109.2                           | -12.8               | -13.7               | -0.084              | 11.4                | 0.16 |
| <i>trans-exo</i> -TS1-IV   | 5.0                               | 19.1                     | 5.5               | 29.6  | -44.4                            | -14.6               | -14.6               | -0.076              | 8.0                 | 0.33 |
| <i>trans-exo</i> -TS2-IV   | 17.7                              | 54.6                     | 5.5               | 77.8  | -86.3                            | -8.5                | -9.0                | -0.077              | 14.1                | 0.30 |
| <i>trans-endo</i> -TS1-V   | 2.3                               | 12.7                     | 3.0               | 17.9  | -23.3                            | -5.4                | -5.3                | -0.074              | 16.7                | 0.23 |
| <i>trans-endo</i> -TS2-V   | 19.3                              | 53.9                     | 3.1               | 76.3  | -81.5                            | -5.2                | -5.9                | -0.083              | 18.8                | 0.25 |
| <i>trans-exo</i> -TS1-V    | 1.1                               | 11.6                     | 3.2               | 15.9  | -21.3                            | -5.6                | -5.3                | -0.068              | 14.9                | 0.27 |
| <i>trans-exo</i> -TS2-V    | 18.3                              | 52.7                     | 3.7               | 74.7  | -73.1                            | 1.6                 | 1.1                 | -0.079              | 24.8                | 0.27 |
| <i>trans-endo</i> -TS1-VI  | 3.6                               | 18.7                     | 3.0               | 25.3  | -33.1                            | -7.8                | -8.0                | -0.076              | 14.8                | 0.29 |
| <i>trans-endo</i> -TS2-VI  | 14.9                              | 44.8                     | 2.7               | 66.4  | -65.9                            | 0.6                 | -0.1                | -0.080              | 23.9                | 0.32 |
| <i>trans-exo</i> -TS1-VI   | 1.9                               | 18.4                     | 4.4               | 24.7  | -29.6                            | -4.9                | -4.7                | -0.069              | 16.0                | 0.33 |
| <i>trans-exo</i> -TS2-VI   | 18.5                              | 90.9                     | 3.3               | 112.7 | -106.1                           | 6.6                 | 6.3                 | -0.074              | 28.5                | 0.33 |
| <i>trans-endo</i> -TS1-VII | 3.7                               | 19.4                     | 5.1               | 28.2  | -42.1                            | -14.1               | -14.6               | -0.074              | 10.4                | 0.37 |
| <i>trans-endo</i> -TS2-VII | 10.1                              | 50.5                     | 7.6               | 68.2  | -83.1                            | -14.9               | -15.9               | -0.087              | 10.1                | 0.43 |
| <i>trans-exo</i> -TS1-VII  | 2.6                               | 21.3                     | 4.3               | 28.2  | -45.7                            | -17.5               | -18.2               | -0.083              | 6.5                 | 0.48 |
| <i>trans-exo</i> -TS2-VII  | 9.5                               | 80.3                     | 6.2               | 96.0  | -110.0                           | -15.0               | -16.1               | -0.088              | 10.2                | 0.55 |

## S4 Stereochemistry in the presence of BINOL-Zn complex.

4.1 Kumar's transition state models for the IEDIDA reaction of **1a** with *cis*-**2a** or *trans*-**2a** catalyzed by chiral BINOL-Zn complex

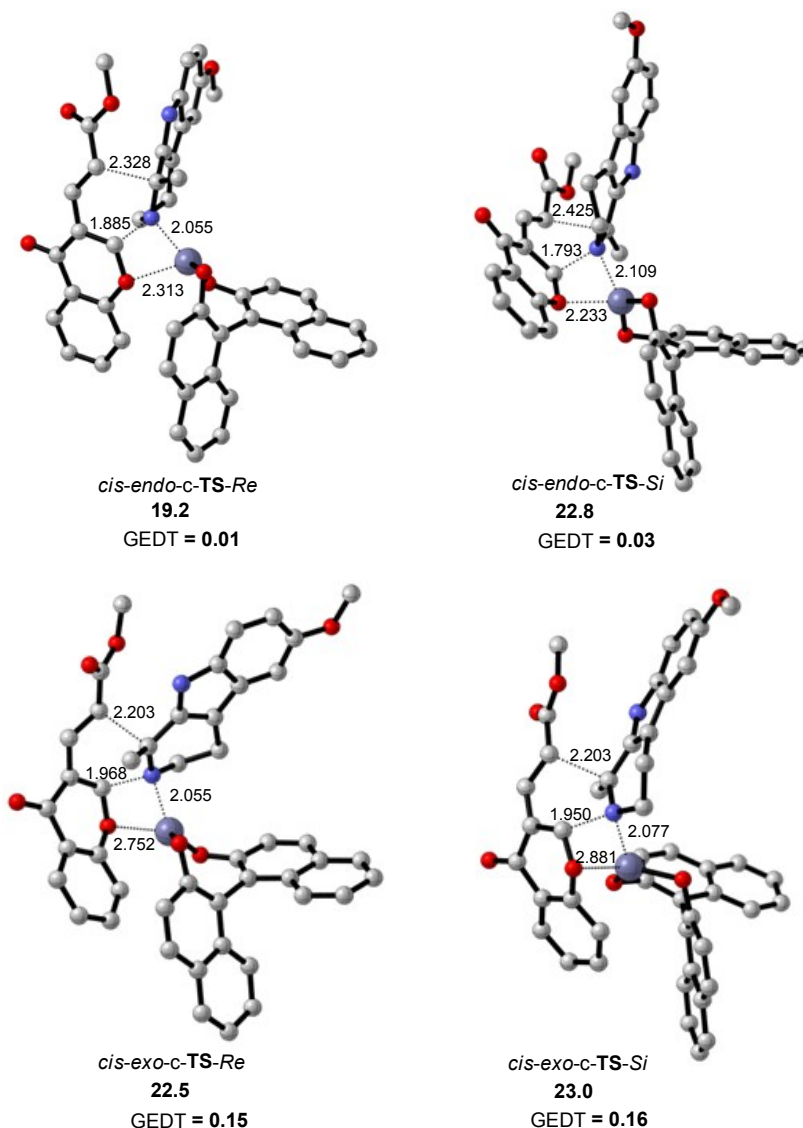

**Figure S15.** The M05-2X/6-31G(d)-optimized Kumar's transition state models for the IEDIDA reaction of **1a** with *cis*-**2a** catalyzed by chiral BINOL-Zn complex (the forming bond distances are labeled in Å, the relative free energies are give in kcal mol<sup>-1</sup> and the values of charge transfer are given in e).

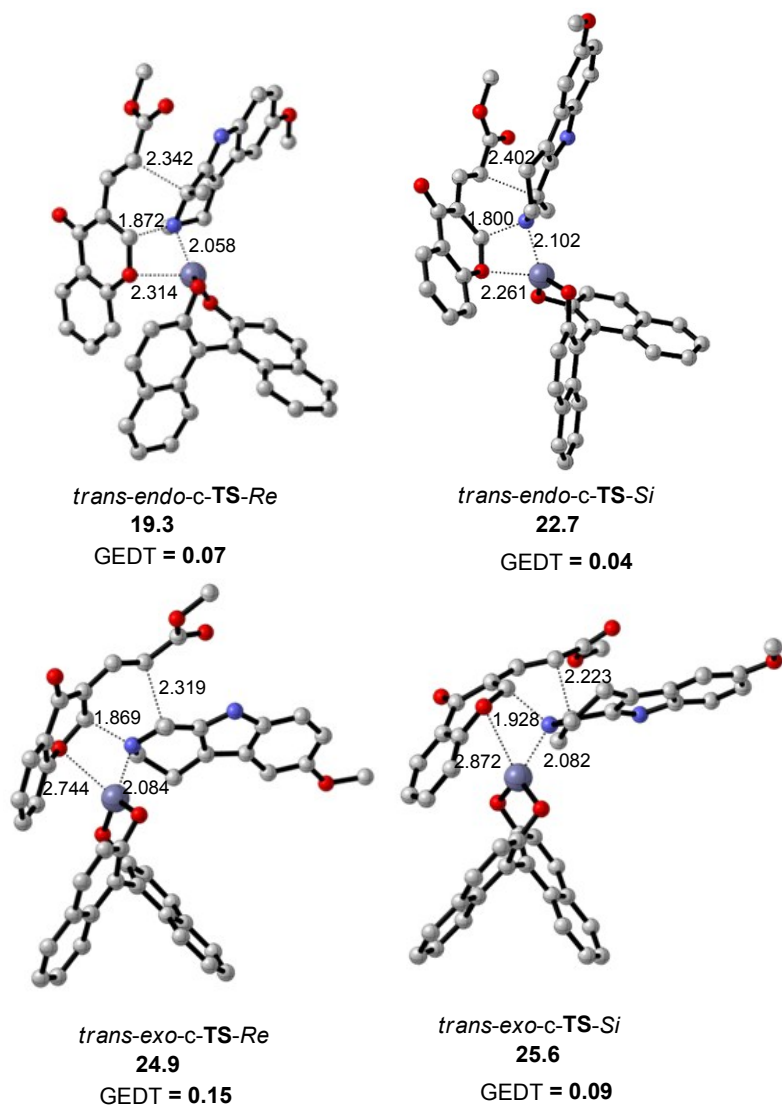

**Figure S16.** The M05-2X/6-31G(d)-optimized Kumar's transition state models for the IEDIDA reaction of **1a** with diene *trans-2a* catalyzed by chiral BINOL-Zn complex (the forming bond distances are labeled in Å, the relative free energies are give in kcal mol<sup>-1</sup> and the values of charge transfer are given in e).

4.2 The models of activation of ester carbonyl group of diene 2a for IEDIDA reaction of imine 1a with diene 2a catalyzed by chiral BINOL-Zn complex

4.2.1 *trans*-2a diene as the substrate

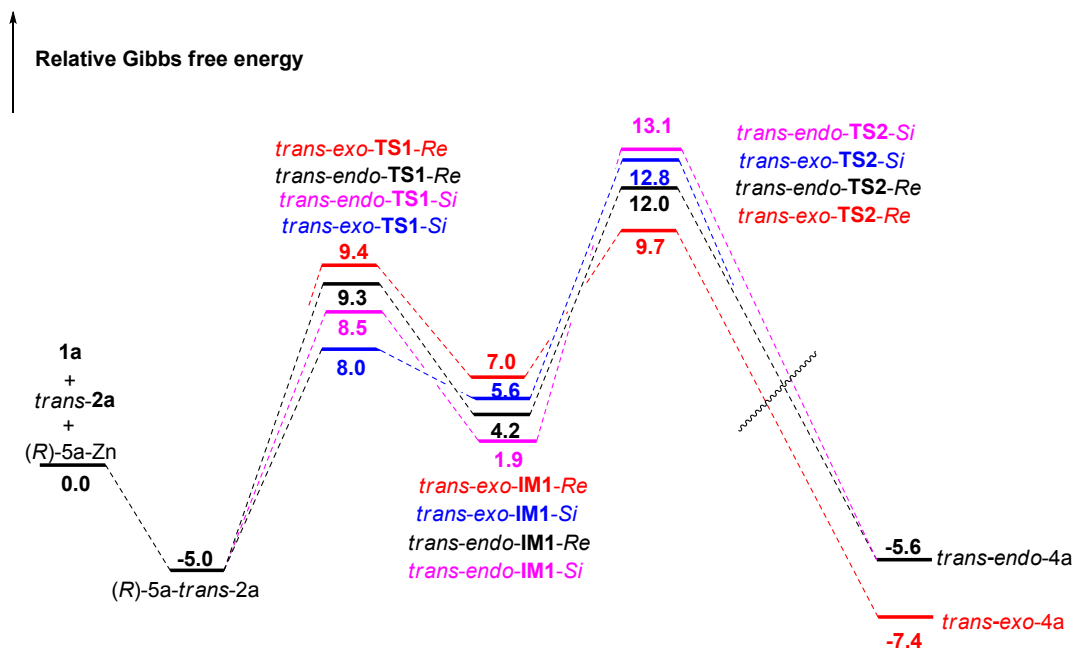

**Figure S17.** Energy profile of the IEDIDA reaction of **1a** with diene *trans*-2a catalyzed by chiral BINOL-Zn complex (the relative free energies are given in kcal mol<sup>-1</sup>).

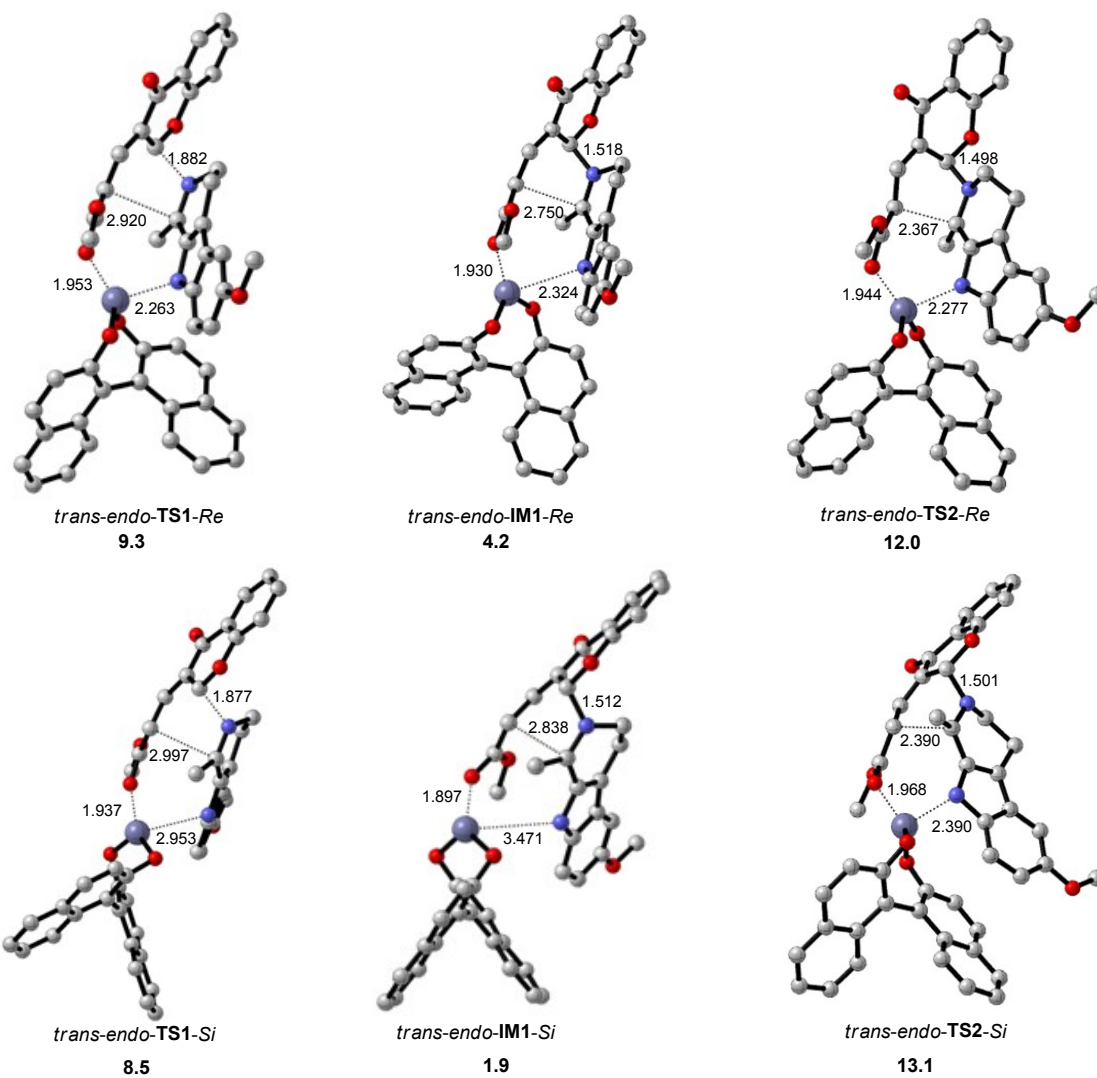

**Figure S18.** The M05-2X/6-31G(d)-optimized transition states and intermediates for the IEDIDA reaction of **1a** with *trans*-**2a** catalyzed by chiral BINOL-Zn complex along the *endo* pathways (the forming bond distances are labeled in Å).

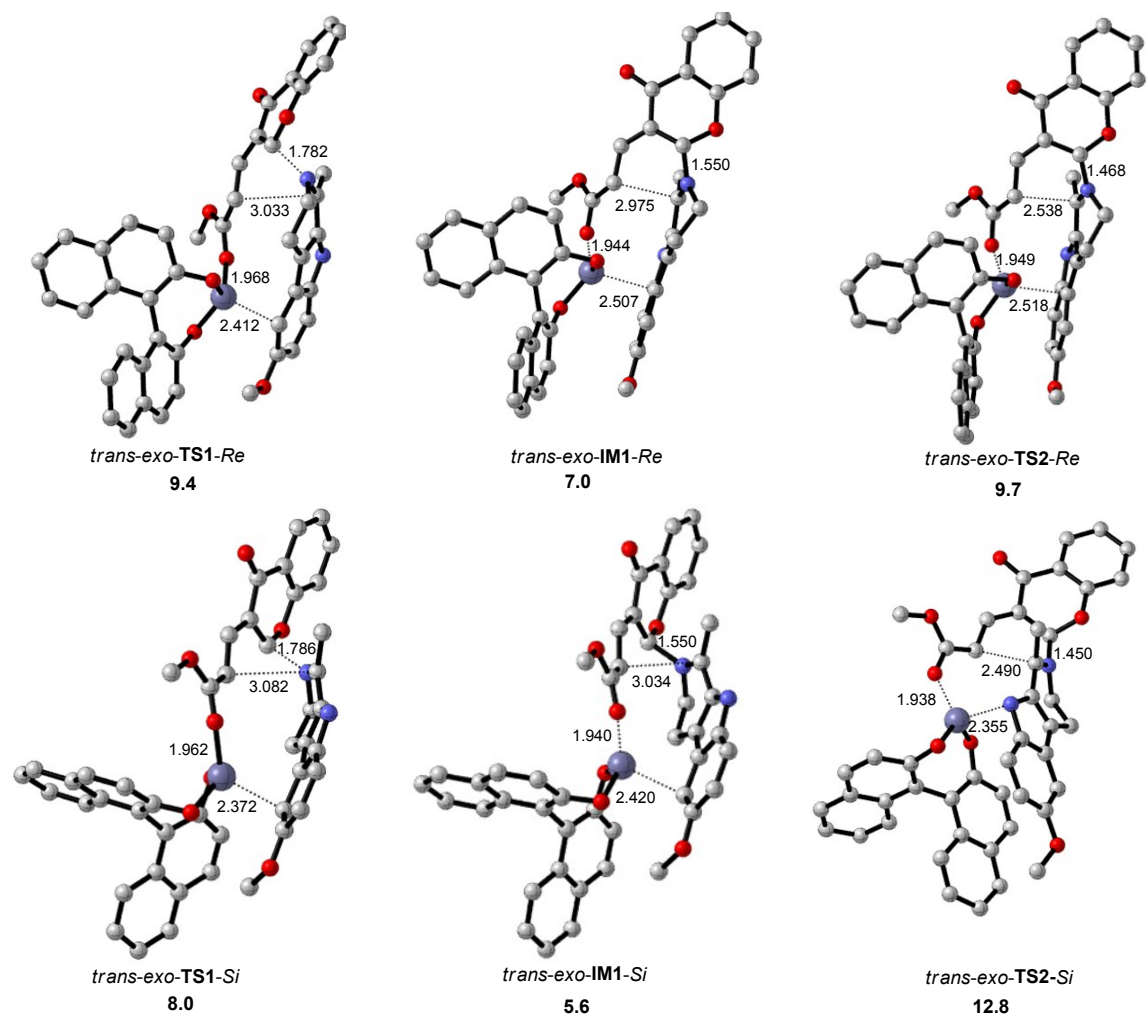

**Figure S19.** The M05-2X/6-31G(d)-optimized transition states and intermediates for the IEDIDA reaction of **1a** with *trans*-**2a** catalyzed by chiral BINOL-Zn complex along the *exo* pathways (the forming bond distances are labeled in Å).

4.2.2 *cis-2a* diene as the substrate

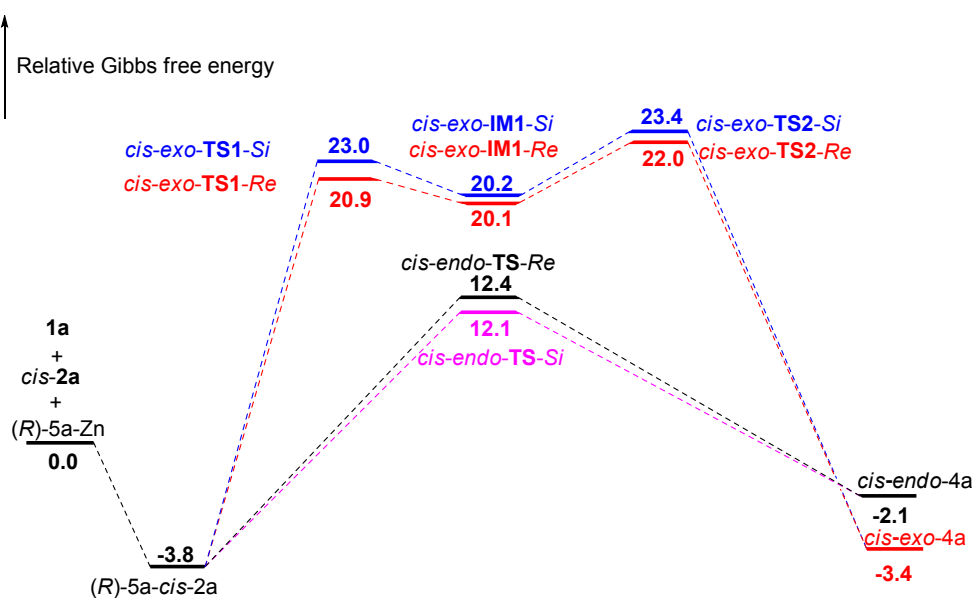

**Figure S20.** Energy profile of the IEDIDA reaction of **1a** with *cis-2a* catalyzed by chiral BINOL-Zn complex (the relative free energies give in kcal mol<sup>-1</sup>).



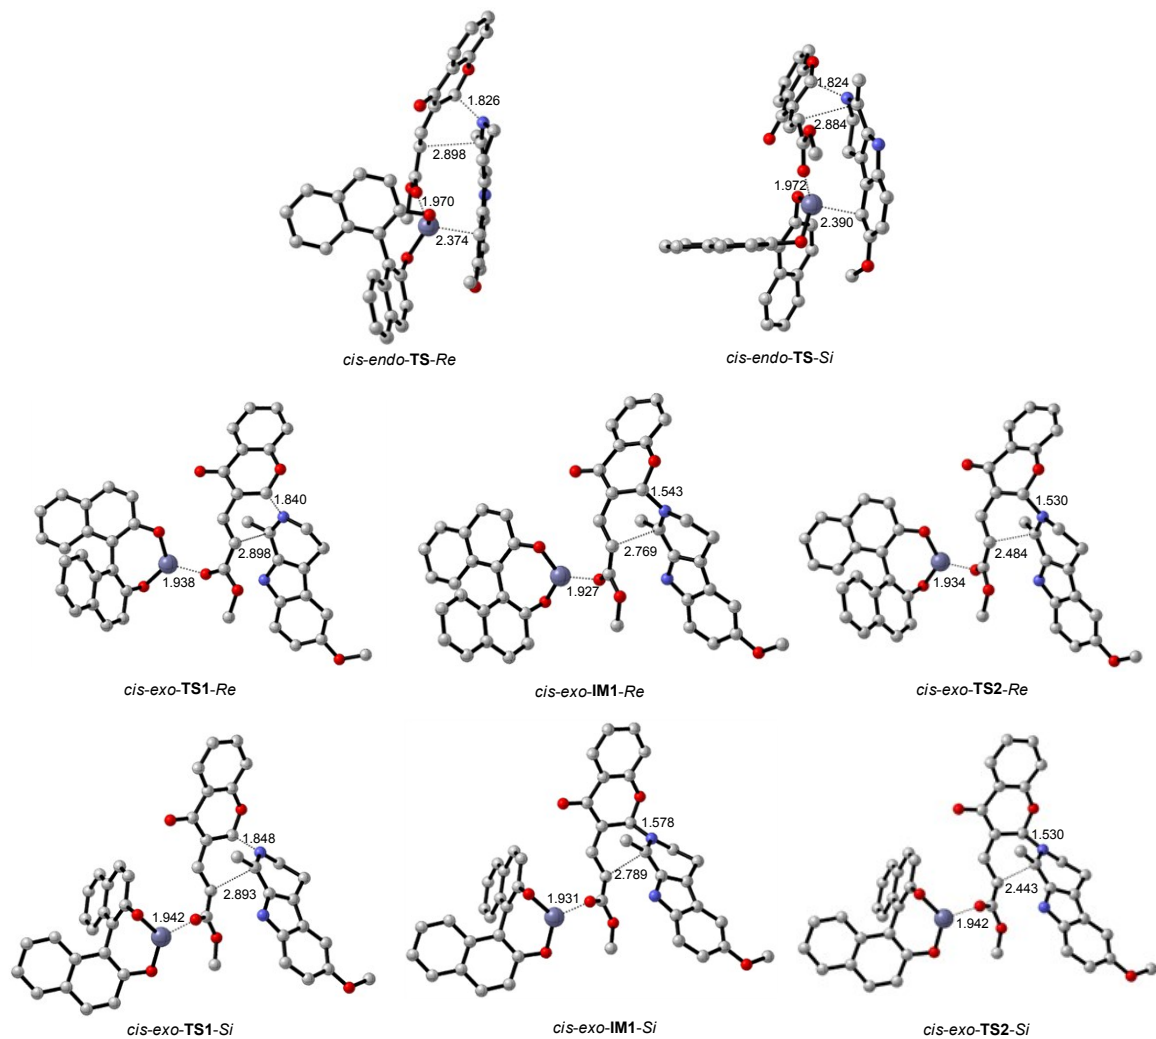

**Figure S21.** The M05-2X/6-31G(d)-optimized transition states and intermediates for the IEDIDA reaction of **1a** with diene *cis-2a* catalyzed by chiral BINOL-Zn complex (the forming bond distances are labeled in Å).

## S5 Cartesian coordinate, frequency and energy information of optimized-structures.

### 5.1 Background reaction

**1a**  
Standard orientation:

---

| Center Number | Atomic Number | Atomic Type | Coordinates (Angstroms) |           |           |
|---------------|---------------|-------------|-------------------------|-----------|-----------|
|               |               |             | X                       | Y         | Z         |
| 1             | 7             | 0           | -3.667403               | 0.950368  | -0.059612 |
| 2             | 6             | 0           | -2.771980               | 2.053714  | -0.424778 |
| 3             | 6             | 0           | -3.146510               | -0.209108 | 0.066916  |
| 4             | 6             | 0           | -4.022406               | -1.397260 | 0.354911  |
| 5             | 1             | 0           | -3.715112               | -1.893068 | 1.278974  |
| 6             | 1             | 0           | -3.957590               | -2.128823 | -0.456489 |
| 7             | 1             | 0           | -5.053326               | -1.063113 | 0.445299  |
| 8             | 6             | 0           | -1.700842               | -0.402714 | -0.038590 |
| 9             | 6             | 0           | -0.819382               | 0.644882  | 0.031775  |
| 10            | 7             | 0           | -1.011533               | -1.592941 | -0.099758 |
| 11            | 6             | 0           | 0.336471                | -1.314521 | -0.090262 |
| 12            | 6             | 0           | 0.495606                | 0.087744  | 0.010315  |
| 13            | 1             | 0           | -1.418806               | -2.503690 | -0.212848 |
| 14            | 6             | 0           | -1.370813               | 2.025489  | 0.202777  |
| 15            | 1             | 0           | -3.279468               | 2.985210  | -0.175377 |
| 16            | 1             | 0           | -2.664166               | 2.023667  | -1.516096 |
| 17            | 1             | 0           | -0.746821               | 2.778632  | -0.283579 |
| 18            | 1             | 0           | -1.420829               | 2.285438  | 1.266348  |
| 19            | 6             | 0           | 1.787571                | 0.648325  | 0.059382  |
| 20            | 6             | 0           | 2.871891                | -0.206425 | -0.002097 |
| 21            | 6             | 0           | 2.695652                | -1.606207 | -0.113176 |
| 22            | 6             | 0           | 1.440996                | -2.171991 | -0.159361 |
| 23            | 8             | 0           | 4.176888                | 0.193750  | 0.035058  |
| 24            | 6             | 0           | 4.418142                | 1.581315  | 0.142289  |
| 25            | 1             | 0           | 5.498381                | 1.700865  | 0.157332  |
| 26            | 1             | 0           | 4.002496                | 2.120982  | -0.713493 |
| 27            | 1             | 0           | 1.906280                | 1.719301  | 0.140683  |
| 28            | 1             | 0           | 3.586785                | -2.217584 | -0.159096 |
| 29            | 1             | 0           | 1.320495                | -3.244896 | -0.242218 |
| 30            | 1             | 0           | 3.992742                | 1.985629  | 1.065095  |

---

Imaginary frequency: none  
Electronic energy  $E = -688.20304$  a.u.  
Enthalpy  $H = -688.20304$  a.u.  
Entropy  $S = 114.473$  cal/mol/K  
Gibbs free energy  $G = -688.20304$  a.u.  
Total free energy in solution  $E_{\text{sol}} = -688.64976$  a.u.

**cis-2a**  
Standard orientation:

---

| Center Number | Atomic Number | Atomic Type | Coordinates (Angstroms) |           |           |
|---------------|---------------|-------------|-------------------------|-----------|-----------|
|               |               |             | X                       | Y         | Z         |
| 1             | 6             | 0           | 0.995585                | 0.994231  | -0.038344 |
| 2             | 6             | 0           | 2.379399                | 0.483413  | 0.022304  |
| 3             | 6             | 0           | -0.031875               | -0.055794 | -0.145738 |
| 4             | 6             | 0           | 0.349845                | -1.348046 | -0.244254 |
| 5             | 6             | 0           | 2.631484                | -0.884223 | -0.056404 |
| 6             | 8             | 0           | 1.615933                | -1.791707 | -0.202864 |
| 7             | 8             | 0           | 0.728646                | 2.183945  | -0.002227 |
| 8             | 6             | 0           | -1.434956               | 0.352349  | -0.194884 |
| 9             | 6             | 0           | -2.483519               | -0.415851 | 0.119287  |
| 10            | 1             | 0           | -0.343309               | -2.165141 | -0.387011 |
| 11            | 1             | 0           | -1.615680               | 1.378366  | -0.496273 |
| 12            | 6             | 0           | -3.850703               | 0.128708  | -0.018744 |
| 13            | 8             | 0           | -4.135306               | 1.237923  | -0.406223 |

---

Imaginary frequency: none  
Electronic energy  $E = -801.991311$  a.u.  
Enthalpy  $H = -801.976062$  a.u.  
Entropy  $S = 122.314$  cal/mol/K  
Gibbs free energy  $G = -802.034178$  a.u.  
Total free energy in solution  $E_{\text{sol}} = -802.43299$  a.u.

|    |   |   |           |           |           |
|----|---|---|-----------|-----------|-----------|
| 14 | 1 | 0 | -2.394630 | -1.427830 | 0.493361  |
| 15 | 8 | 0 | -4.770293 | -0.783524 | 0.348767  |
| 16 | 6 | 0 | -6.124692 | -0.332079 | 0.241300  |
| 17 | 1 | 0 | -6.352331 | -0.069943 | -0.790515 |
| 18 | 1 | 0 | -6.280540 | 0.541881  | 0.871418  |
| 19 | 1 | 0 | -6.738635 | -1.163642 | 0.573542  |
| 20 | 6 | 0 | 3.461216  | 1.361191  | 0.159801  |
| 21 | 6 | 0 | 4.752725  | 0.872189  | 0.217327  |
| 22 | 6 | 0 | 4.981022  | -0.508448 | 0.136501  |
| 23 | 6 | 0 | 3.926767  | -1.394806 | -0.001413 |
| 24 | 1 | 0 | 3.242189  | 2.419159  | 0.218311  |
| 25 | 1 | 0 | 5.587943  | 1.551269  | 0.324235  |
| 26 | 1 | 0 | 5.992603  | -0.890588 | 0.181289  |
| 27 | 1 | 0 | 4.076765  | -2.463628 | -0.068411 |

### trans-2a

Standard orientation:

| Center Number | Atomic Number | Atomic Type | Coordinates (Angstroms) |   |   |
|---------------|---------------|-------------|-------------------------|---|---|
|               |               |             | X                       | Y | Z |

|    |   |   |           |           |           |
|----|---|---|-----------|-----------|-----------|
| 1  | 6 | 0 | -0.854954 | 0.905833  | -0.012293 |
| 2  | 6 | 0 | -2.280658 | 0.526025  | -0.022520 |
| 3  | 6 | 0 | 0.074672  | -0.232961 | 0.079871  |
| 4  | 6 | 0 | -0.420984 | -1.482835 | 0.210436  |
| 5  | 6 | 0 | -2.654636 | -0.811403 | 0.084623  |
| 6  | 8 | 0 | -1.723536 | -1.807196 | 0.212646  |
| 7  | 8 | 0 | -0.479421 | 2.065469  | -0.073614 |
| 8  | 6 | 0 | 1.509612  | 0.052469  | 0.081345  |
| 9  | 6 | 0 | 2.475213  | -0.818534 | -0.233006 |
| 10 | 1 | 0 | 0.196940  | -2.359672 | 0.344845  |
| 11 | 1 | 0 | 1.770818  | 1.070384  | 0.343327  |
| 12 | 6 | 0 | 3.914543  | -0.490717 | -0.175953 |
| 13 | 8 | 0 | 4.789565  | -1.281841 | -0.445537 |
| 14 | 1 | 0 | 2.275285  | -1.829451 | -0.565405 |
| 15 | 8 | 0 | 4.158381  | 0.774302  | 0.207477  |
| 16 | 6 | 0 | 5.546894  | 1.116768  | 0.268465  |
| 17 | 1 | 0 | 6.006176  | 1.001183  | -0.711516 |
| 18 | 1 | 0 | 6.061497  | 0.474028  | 0.980522  |
| 19 | 1 | 0 | 5.577976  | 2.153259  | 0.589796  |
| 20 | 6 | 0 | -3.281122 | 1.498570  | -0.139342 |
| 21 | 6 | 0 | -4.613086 | 1.130748  | -0.150257 |
| 22 | 6 | 0 | -4.964448 | -0.221995 | -0.041523 |
| 23 | 6 | 0 | -3.992707 | -1.200263 | 0.076556  |
| 24 | 1 | 0 | -2.967404 | 2.530938  | -0.220702 |
| 25 | 1 | 0 | -5.385416 | 1.882605  | -0.241997 |
| 26 | 1 | 0 | -6.007939 | -0.509559 | -0.049404 |
| 27 | 1 | 0 | -4.237894 | -2.249807 | 0.164335  |

Imaginary frequency: none

Electronic energy  $E = -801.990603$  a.u.

Enthalpy  $H = -801.975281$  a.u.

Entropy  $S = 123.616$  cal/mol/K

Gibbs free energy  $G = -801.975281$  a.u.

Total free energy in solution  $E_{\text{sol}} = -802.43256$  a.u.

### cis-endo-TSa

Standard orientation:

| Center Number | Atomic Number | Atomic Type | Coordinates (Angstroms) |   |   |
|---------------|---------------|-------------|-------------------------|---|---|
|               |               |             | X                       | Y | Z |

|   |   |   |           |           |           |
|---|---|---|-----------|-----------|-----------|
| 1 | 6 | 0 | -1.094663 | -0.589982 | -1.367633 |
|---|---|---|-----------|-----------|-----------|

Imaginary frequency:  $-306.0935$  cm<sup>-1</sup>

Electronic energy  $E = -1490.182372$  a.u.

Enthalpy  $H = -1490.153499$  a.u.

Entropy  $S = 184.501$  cal/mol/K

Gibbs free energy  $G = -1490.241162$  a.u.

Total free energy in solution  $E_{\text{sol}} = -1491.07119$  a.u.

|    |   |   |           |           |           |
|----|---|---|-----------|-----------|-----------|
| 2  | 7 | 0 | 1.276968  | -0.591389 | -1.391092 |
| 3  | 6 | 0 | 0.168870  | -1.270715 | -1.518764 |
| 4  | 6 | 0 | 0.172736  | -2.705437 | -1.967685 |
| 5  | 6 | 0 | -1.212182 | 0.676765  | -0.842287 |
| 6  | 6 | 0 | 1.178840  | 0.880614  | -1.326779 |
| 7  | 6 | 0 | 0.022092  | 1.446828  | -0.493260 |
| 8  | 1 | 0 | -0.521372 | -3.308059 | -1.381188 |
| 9  | 1 | 0 | 1.166731  | -3.145113 | -1.927977 |
| 10 | 1 | 0 | -0.145391 | -2.725410 | -3.014914 |
| 11 | 6 | 0 | -2.603126 | 0.925558  | -0.670668 |
| 12 | 6 | 0 | -3.280613 | -0.231269 | -1.123942 |
| 13 | 7 | 0 | -2.344889 | -1.139224 | -1.557099 |
| 14 | 1 | 0 | -2.532718 | -2.099088 | -1.785647 |
| 15 | 1 | 0 | 1.047865  | 1.200731  | -2.364474 |
| 16 | 1 | 0 | 2.135893  | 1.261794  | -0.980330 |
| 17 | 1 | 0 | -0.084208 | 2.505602  | -0.741978 |
| 18 | 1 | 0 | 0.229199  | 1.385806  | 0.578870  |
| 19 | 6 | 0 | -3.333204 | 2.024064  | -0.171727 |
| 20 | 6 | 0 | -4.679198 | -0.317798 | -1.094966 |
| 21 | 6 | 0 | -4.709912 | 1.926394  | -0.139125 |
| 22 | 6 | 0 | -5.373878 | 0.761512  | -0.599859 |
| 23 | 1 | 0 | -2.812174 | 2.902907  | 0.179562  |
| 24 | 8 | 0 | -5.544592 | 2.900069  | 0.319875  |
| 25 | 1 | 0 | -6.454165 | 0.753059  | -0.545553 |
| 26 | 1 | 0 | -5.199357 | -1.200391 | -1.445283 |
| 27 | 6 | 0 | -4.940249 | 4.067618  | 0.841321  |
| 28 | 1 | 0 | -5.754347 | 4.705286  | 1.175113  |
| 29 | 1 | 0 | -4.360851 | 4.587094  | 0.072976  |
| 30 | 1 | 0 | -4.290161 | 3.827945  | 1.686846  |
| 31 | 6 | 0 | 2.912570  | 0.444147  | 1.447791  |
| 32 | 6 | 0 | 4.126821  | 0.825295  | 0.678998  |
| 33 | 6 | 0 | 2.227209  | -0.728009 | 0.953086  |
| 34 | 6 | 0 | 2.560921  | -1.260924 | -0.330529 |
| 35 | 6 | 0 | 4.484950  | 0.117069  | -0.465739 |
| 36 | 8 | 0 | 3.746929  | -0.945645 | -0.929108 |
| 37 | 8 | 0 | 2.555259  | 1.093109  | 2.429355  |
| 38 | 6 | 0 | 1.018395  | -1.135129 | 1.577197  |
| 39 | 6 | 0 | 0.233260  | -2.173253 | 1.186644  |
| 40 | 1 | 0 | 2.348022  | -2.303765 | -0.516615 |
| 41 | 1 | 0 | 0.656808  | -0.489906 | 2.372353  |
| 42 | 6 | 0 | -1.135508 | -2.287807 | 1.677028  |
| 43 | 8 | 0 | -1.666818 | -1.619133 | 2.534820  |
| 44 | 1 | 0 | 0.562975  | -2.932012 | 0.493883  |
| 45 | 8 | 0 | -1.817990 | -3.244467 | 0.979689  |
| 46 | 6 | 0 | -3.195440 | -3.352204 | 1.346153  |
| 47 | 1 | 0 | -3.291364 | -3.585111 | 2.405043  |
| 48 | 1 | 0 | -3.714337 | -2.414869 | 1.144408  |
| 49 | 1 | 0 | -3.601259 | -4.159183 | 0.740757  |
| 50 | 6 | 0 | 4.928706  | 1.892535  | 1.088721  |
| 51 | 6 | 0 | 6.065422  | 2.234868  | 0.373659  |
| 52 | 6 | 0 | 6.408368  | 1.507114  | -0.769322 |
| 53 | 6 | 0 | 5.621312  | 0.447074  | -1.197048 |
| 54 | 1 | 0 | 4.625930  | 2.426305  | 1.980041  |
| 55 | 1 | 0 | 6.686030  | 3.059773  | 0.697544  |
| 56 | 1 | 0 | 7.295538  | 1.769156  | -1.331579 |
| 57 | 1 | 0 | 5.864842  | -0.129299 | -2.079165 |

-----

**cis-exo-TS<sub>a</sub>**

Standard orientation:

-----

Center Atomic Atomic Coordinates (Angstroms)

Imaginary frequency: -268.2487 cm<sup>-1</sup>

Electronic energy  $E = -1490.179994$  a.u.

Enthalpy  $H = -1490.151034$  a.u.

Entropy  $S = 114.473$  cal/mol/K

| Number | Number | Type | X         | Y         | Z         |
|--------|--------|------|-----------|-----------|-----------|
| 1      | 6      | 0    | -3.886455 | 1.250638  | -0.374294 |
| 2      | 6      | 0    | -4.762915 | 0.100592  | -0.021789 |
| 3      | 6      | 0    | -2.610472 | 0.880074  | -0.940878 |
| 4      | 6      | 0    | -2.265154 | -0.511249 | -1.077499 |
| 5      | 8      | 0    | -3.254249 | -1.463512 | -1.075095 |
| 6      | 8      | 0    | -4.233420 | 2.405535  | -0.137702 |
| 7      | 6      | 0    | -1.569469 | 1.828470  | -0.967620 |
| 8      | 6      | 0    | -0.257561 | 1.554979  | -1.246009 |
| 9      | 1      | 0    | -1.604709 | -0.732964 | -1.912441 |
| 10     | 1      | 0    | -1.818940 | 2.813626  | -0.584236 |
| 11     | 6      | 0    | 0.798924  | 2.455187  | -0.816139 |
| 12     | 8      | 0    | 0.674839  | 3.403677  | -0.059966 |
| 13     | 1      | 0    | 0.062565  | 0.655630  | -1.753443 |
| 14     | 8      | 0    | 2.006446  | 2.054563  | -1.281235 |
| 15     | 6      | 0    | 3.113207  | 2.835838  | -0.832923 |
| 16     | 1      | 0    | 3.078108  | 3.830533  | -1.276568 |
| 17     | 1      | 0    | 3.097484  | 2.932920  | 0.251150  |
| 18     | 1      | 0    | 4.002824  | 2.299850  | -1.152560 |
| 19     | 6      | 0    | -4.402044 | -1.199596 | -0.368043 |
| 20     | 6      | 0    | -5.963781 | 0.306409  | 0.660462  |
| 21     | 6      | 0    | -6.782504 | -0.763487 | 0.985343  |
| 22     | 6      | 0    | -6.404306 | -2.058929 | 0.621285  |
| 23     | 6      | 0    | -5.215025 | -2.284759 | -0.057673 |
| 24     | 1      | 0    | -4.902872 | -3.277418 | -0.352777 |
| 25     | 1      | 0    | -7.041432 | -2.898419 | 0.869216  |
| 26     | 1      | 0    | -7.712130 | -0.598497 | 1.513717  |
| 27     | 1      | 0    | -6.221577 | 1.326927  | 0.912318  |
| 28     | 6      | 0    | 0.984871  | -0.324944 | 0.916528  |
| 29     | 7      | 0    | -1.127958 | -1.038192 | 0.108483  |
| 30     | 6      | 0    | -0.446202 | -0.168176 | 0.822769  |
| 31     | 6      | 0    | -1.123821 | 0.829976  | 1.711295  |
| 32     | 6      | 0    | 1.718028  | -1.147317 | 0.090048  |
| 33     | 6      | 0    | -0.419718 | -2.239711 | -0.368291 |
| 34     | 6      | 0    | 0.998563  | -2.004813 | -0.901712 |
| 35     | 1      | 0    | -0.678527 | 1.821280  | 1.609825  |
| 36     | 1      | 0    | -0.986133 | 0.475155  | 2.739046  |
| 37     | 1      | 0    | -2.189930 | 0.885226  | 1.521449  |
| 38     | 6      | 0    | 3.090509  | -0.869217 | 0.339422  |
| 39     | 6      | 0    | 3.122923  | 0.124691  | 1.346728  |
| 40     | 7      | 0    | 1.830773  | 0.436768  | 1.691127  |
| 41     | 1      | 0    | 1.552164  | 1.213064  | 2.266570  |
| 42     | 1      | 0    | -1.059523 | -2.716893 | -1.109485 |
| 43     | 1      | 0    | -0.356621 | -2.909504 | 0.492854  |
| 44     | 1      | 0    | 0.990692  | -1.521737 | -1.885275 |
| 45     | 1      | 0    | 1.482266  | -2.975829 | -1.029234 |
| 46     | 6      | 0    | 4.293642  | -1.364835 | -0.206468 |
| 47     | 6      | 0    | 5.482129  | -0.848122 | 0.269629  |
| 48     | 6      | 0    | 5.497504  | 0.143550  | 1.283559  |
| 49     | 6      | 0    | 4.335622  | 0.633330  | 1.832572  |
| 50     | 8      | 0    | 6.717994  | -1.220794 | -0.164594 |
| 51     | 6      | 0    | 6.771974  | -2.202012 | -1.181130 |
| 52     | 1      | 0    | 7.825925  | -2.360166 | -1.392565 |
| 53     | 1      | 0    | 6.264008  | -1.857653 | -2.086134 |
| 54     | 1      | 0    | 6.321048  | -3.140007 | -0.845670 |
| 55     | 1      | 0    | 4.265684  | -2.121180 | -0.977687 |
| 56     | 1      | 0    | 6.464137  | 0.500516  | 1.612315  |
| 57     | 1      | 0    | 4.362090  | 1.390334  | 2.606060  |

Gibbs free energy  $G = -1490.239484$  a.u.

Total free energy in solution  $E_{\text{sol}} = -1491.06901$  a.u.

**cis-endo-TSb**

Standard orientation:

| Center<br>Number | Atomic<br>Number | Atomic<br>Type | Coordinates (Angstroms) |           |           |
|------------------|------------------|----------------|-------------------------|-----------|-----------|
|                  |                  |                | X                       | Y         | Z         |
| 1                | 7                | 0              | -2.441277               | -0.827786 | 0.809622  |
| 2                | 6                | 0              | -1.541906               | -0.141065 | 1.518190  |
| 3                | 6                | 0              | -2.010615               | 0.517332  | 2.793802  |
| 4                | 6                | 0              | -1.963801               | -1.962376 | -0.013240 |
| 5                | 1                | 0              | -1.406846               | 1.389140  | 3.055267  |
| 6                | 1                | 0              | -1.958385               | -0.202441 | 3.615502  |
| 7                | 1                | 0              | -3.053266               | 0.824393  | 2.700946  |
| 8                | 6                | 0              | -0.133952               | -0.488783 | 1.359628  |
| 9                | 6                | 0              | -0.569850               | -1.873390 | -0.655033 |
| 10               | 6                | 0              | 0.364357                | -1.264066 | 0.342069  |
| 11               | 7                | 0              | 0.899810                | -0.032532 | 2.147066  |
| 12               | 6                | 0              | 2.087375                | -0.496324 | 1.624143  |
| 13               | 6                | 0              | 1.784617                | -1.275223 | 0.482875  |
| 14               | 1                | 0              | 0.811839                | 0.607147  | 2.915460  |
| 15               | 1                | 0              | -1.958181               | -2.803751 | 0.686433  |
| 16               | 1                | 0              | -2.720425               | -2.163164 | -0.768009 |
| 17               | 1                | 0              | -0.257324               | -2.889712 | -0.913625 |
| 18               | 1                | 0              | -0.591643               | -1.304790 | -1.587045 |
| 19               | 6                | 0              | 3.405084                | -0.298187 | 2.047073  |
| 20               | 6                | 0              | 2.825578                | -1.866142 | -0.259534 |
| 21               | 6                | 0              | 4.126588                | -1.656784 | 0.160118  |
| 22               | 6                | 0              | 4.412134                | -0.880175 | 1.307070  |
| 23               | 8                | 0              | 5.230894                | -2.159186 | -0.469163 |
| 24               | 6                | 0              | 5.006976                | -2.936434 | -1.626630 |
| 25               | 1                | 0              | 2.593485                | -2.453988 | -1.136003 |
| 26               | 1                | 0              | 3.634568                | 0.297905  | 2.921819  |
| 27               | 1                | 0              | 5.451151                | -0.758810 | 1.582028  |
| 28               | 1                | 0              | 4.412215                | -3.825072 | -1.397177 |
| 29               | 1                | 0              | 5.988272                | -3.238928 | -1.983248 |
| 30               | 1                | 0              | 4.499647                | -2.354020 | -2.401011 |
| 31               | 6                | 0              | -0.333967               | 1.411223  | -1.813546 |
| 32               | 6                | 0              | 0.927598                | 1.885259  | -1.217572 |
| 33               | 6                | 0              | -1.493861               | 1.428564  | -0.894173 |
| 34               | 6                | 0              | -1.324868               | 1.930359  | 0.386910  |
| 35               | 6                | 0              | 0.953402                | 2.395952  | 0.080632  |
| 36               | 8                | 0              | -0.176029               | 2.507520  | 0.836984  |
| 37               | 8                | 0              | -0.405994               | 0.987690  | -2.956400 |
| 38               | 6                | 0              | -2.633462               | 0.682436  | -1.222816 |
| 39               | 6                | 0              | -3.504579               | 0.287539  | -0.198291 |
| 40               | 1                | 0              | -2.154347               | 2.226671  | 1.008057  |
| 41               | 1                | 0              | -2.675246               | 0.193201  | -2.186821 |
| 42               | 6                | 0              | -4.679755               | -0.558301 | -0.569288 |
| 43               | 8                | 0              | -4.730006               | -1.302897 | -1.520336 |
| 44               | 8                | 0              | -5.682272               | -0.403522 | 0.304354  |
| 45               | 6                | 0              | -6.837671               | -1.207683 | 0.032252  |
| 46               | 1                | 0              | -6.570435               | -2.262501 | 0.053032  |
| 47               | 1                | 0              | -7.549081               | -0.972251 | 0.817463  |
| 48               | 1                | 0              | -7.243106               | -0.960577 | -0.947070 |
| 49               | 1                | 0              | -3.746546               | 0.968681  | 0.608251  |
| 50               | 6                | 0              | 2.129059                | 1.787310  | -1.930295 |
| 51               | 6                | 0              | 3.319489                | 2.195285  | -1.359937 |
| 52               | 6                | 0              | 3.320984                | 2.715425  | -0.059234 |
| 53               | 6                | 0              | 2.145583                | 2.823819  | 0.663284  |
| 54               | 1                | 0              | 2.082402                | 1.377373  | -2.930562 |
| 55               | 1                | 0              | 4.247613                | 2.108092  | -1.908295 |

Imaginary frequency: -506.9835 cm<sup>-1</sup>Electronic energy  $E = -1490.161497$  a.u.Enthalpy  $H = -1490.132800$  a.u.Entropy  $S = 114.473$  cal/mol/KGibbs free energy  $G = -1490.219222$  a.u.Total free energy in solution  $E_{sol} = -1491.04499$  a.u.

|    |   |   |          |          |          |
|----|---|---|----------|----------|----------|
| 56 | 1 | 0 | 4.252541 | 3.030361 | 0.393241 |
| 57 | 1 | 0 | 2.125423 | 3.219003 | 1.670305 |

**cis-exo-TSb**

Standard orientation:

| Center Number | Atomic Number | Atomic Type | Coordinates (Angstroms) |           |           |
|---------------|---------------|-------------|-------------------------|-----------|-----------|
|               |               |             | X                       | Y         | Z         |
| 1             | 7             | 0           | 1.476838                | -1.701457 | 0.646730  |
| 2             | 6             | 0           | 0.816635                | -0.572153 | 0.962581  |
| 3             | 6             | 0           | 1.510807                | 0.332538  | 1.944107  |
| 4             | 6             | 0           | 0.666733                | -2.851852 | 0.202175  |
| 5             | 1             | 0           | 1.116093                | 1.350468  | 1.924248  |
| 6             | 1             | 0           | 2.579406                | 0.359563  | 1.728233  |
| 7             | 1             | 0           | 1.392543                | -0.082979 | 2.948489  |
| 8             | 6             | 0           | -0.640943               | -0.588779 | 0.888839  |
| 9             | 6             | 0           | -0.617636               | -2.560040 | -0.591996 |
| 10            | 6             | 0           | -1.359338               | -1.482692 | 0.134240  |
| 11            | 7             | 0           | -1.483718               | 0.345104  | 1.438564  |
| 12            | 6             | 0           | -2.770575               | 0.064922  | 1.032354  |
| 13            | 6             | 0           | -2.728640               | -1.083289 | 0.205676  |
| 14            | 1             | 0           | -1.204781               | 1.128954  | 2.000934  |
| 15            | 1             | 0           | 1.322642                | -3.529479 | -0.340659 |
| 16            | 1             | 0           | 0.374782                | -3.355539 | 1.128660  |
| 17            | 1             | 0           | -0.389773               | -2.269377 | -1.624694 |
| 18            | 1             | 0           | -1.199610               | -3.483362 | -0.654892 |
| 19            | 6             | 0           | -3.919463               | -1.590149 | -0.350118 |
| 20            | 6             | 0           | -5.104714               | -0.936816 | -0.063108 |
| 21            | 6             | 0           | -5.129382               | 0.206839  | 0.767930  |
| 22            | 6             | 0           | -3.974021               | 0.713948  | 1.323710  |
| 23            | 8             | 0           | -6.328552               | -1.314494 | -0.537104 |
| 24            | 6             | 0           | -6.370568               | -2.457729 | -1.365144 |
| 25            | 1             | 0           | -4.004192               | 1.588446  | 1.961756  |
| 26            | 1             | 0           | -6.089543               | 0.668989  | 0.952754  |
| 27            | 1             | 0           | -3.888909               | -2.464657 | -0.984143 |
| 28            | 1             | 0           | -6.003281               | -3.341826 | -0.836092 |
| 29            | 1             | 0           | -7.414801               | -2.601146 | -1.630660 |
| 30            | 1             | 0           | -5.779806               | -2.309394 | -2.273704 |
| 31            | 6             | 0           | 2.653159                | 2.354379  | -0.562024 |
| 32            | 6             | 0           | 1.505548                | 3.274183  | -0.433617 |
| 33            | 6             | 0           | 2.287729                | 0.940636  | -0.821192 |
| 34            | 6             | 0           | 0.937124                | 0.605208  | -0.942403 |
| 35            | 6             | 0           | 0.201964                | 2.813667  | -0.630370 |
| 36            | 8             | 0           | -0.065114               | 1.530821  | -0.987954 |
| 37            | 8             | 0           | 3.807900                | 2.723288  | -0.436191 |
| 38            | 6             | 0           | 3.241258                | -0.052533 | -0.625968 |
| 39            | 6             | 0           | 2.850474                | -1.404327 | -0.574542 |
| 40            | 1             | 0           | 0.614730                | -0.304524 | -1.420757 |
| 41            | 1             | 0           | 4.217319                | 0.236823  | -0.259936 |
| 42            | 6             | 0           | 3.901825                | -2.345482 | -0.073025 |
| 43            | 8             | 0           | 4.825021                | -2.033759 | 0.635933  |
| 44            | 8             | 0           | 3.684964                | -3.603437 | -0.495179 |
| 45            | 6             | 0           | 4.630692                | -4.563552 | -0.003435 |
| 46            | 1             | 0           | 4.608977                | -4.584388 | 1.084429  |
| 47            | 1             | 0           | 4.320848                | -5.517989 | -0.417378 |
| 48            | 1             | 0           | 5.633037                | -4.302236 | -0.336448 |
| 49            | 1             | 0           | 2.255883                | -1.801947 | -1.391872 |
| 50            | 6             | 0           | 1.703925                | 4.616936  | -0.086729 |
| 51            | 6             | 0           | 0.626764                | 5.470288  | 0.059865  |
| 52            | 6             | 0           | -0.674419               | 4.985900  | -0.137439 |

Imaginary frequency: -532.3827 cm<sup>-1</sup>

Electronic energy  $E = -1490.173142$  a.u.

Enthalpy  $H = -1490.144410$  a.u.

Entropy  $S = 184.511$  cal/mol/K

Gibbs free energy  $G = -1490.232077$  a.u.

Total free energy in solution  $E_{\text{sol}} = -1491.03785$  a.u.

|    |   |   |           |          |           |
|----|---|---|-----------|----------|-----------|
| 53 | 6 | 0 | -0.895874 | 3.663396 | -0.480178 |
| 54 | 1 | 0 | 2.723559  | 4.948298 | 0.060455  |
| 55 | 1 | 0 | 0.783437  | 6.506745 | 0.326952  |
| 56 | 1 | 0 | -1.519821 | 5.652190 | -0.021177 |
| 57 | 1 | 0 | -1.888700 | 3.262798 | -0.638720 |

**cis-endo-3a**  
Standard orientation:

| Center Number | Atomic Number | Atomic Type | Coordinates (Angstroms) |           |           |
|---------------|---------------|-------------|-------------------------|-----------|-----------|
|               |               |             | X                       | Y         | Z         |
| 1             | 6             | 0           | 0.900357                | 0.940092  | 0.640508  |
| 2             | 7             | 0           | 1.145304                | -1.280993 | 1.621801  |
| 3             | 6             | 0           | 1.883212                | -0.132302 | 1.056546  |
| 4             | 6             | 0           | 2.877262                | 0.405777  | 2.093637  |
| 5             | 6             | 0           | -0.415133               | 0.984823  | 1.021052  |
| 6             | 6             | 0           | 0.073934                | -0.874080 | 2.541352  |
| 7             | 6             | 0           | -1.045410               | -0.055300 | 1.889951  |
| 8             | 1             | 0           | 3.389080                | 1.286826  | 1.699077  |
| 9             | 1             | 0           | 3.611664                | -0.361261 | 2.342337  |
| 10            | 1             | 0           | 2.358627                | 0.712160  | 3.000285  |
| 11            | 6             | 0           | -0.977920               | 2.167637  | 0.437120  |
| 12            | 6             | 0           | 0.057883                | 2.792920  | -0.285505 |
| 13            | 7             | 0           | 1.204061                | 2.042979  | -0.126415 |
| 14            | 1             | 0           | 2.033244                | 2.120974  | -0.696072 |
| 15            | 1             | 0           | 0.546794                | -0.266644 | 3.314050  |
| 16            | 1             | 0           | -0.315116               | -1.764049 | 3.027552  |
| 17            | 1             | 0           | -1.655780               | 0.405675  | 2.673111  |
| 18            | 1             | 0           | -1.714671               | -0.699741 | 1.310570  |
| 19            | 6             | 0           | -2.262739               | 2.739172  | 0.468550  |
| 20            | 6             | 0           | -0.160283               | 3.976160  | -0.997935 |
| 21            | 6             | 0           | -2.470848               | 3.912328  | -0.236366 |
| 22            | 6             | 0           | -1.426347               | 4.522327  | -0.965819 |
| 23            | 1             | 0           | -3.054664               | 2.258930  | 1.026053  |
| 24            | 8             | 0           | -3.666328               | 4.574953  | -0.296283 |
| 25            | 1             | 0           | -1.655513               | 5.435592  | -1.498010 |
| 26            | 1             | 0           | 0.634545                | 4.452435  | -1.558077 |
| 27            | 6             | 0           | -4.746283               | 4.006453  | 0.411579  |
| 28            | 1             | 0           | -5.596083               | 4.665109  | 0.249586  |
| 29            | 1             | 0           | -4.529958               | 3.946352  | 1.482349  |
| 30            | 1             | 0           | -4.982615               | 3.006462  | 0.036258  |
| 31            | 6             | 0           | -0.445439               | -2.179824 | -1.685642 |
| 32            | 6             | 0           | -1.564109               | -2.870503 | -1.023902 |
| 33            | 6             | 0           | 0.684201                | -1.838265 | -0.790646 |
| 34            | 6             | 0           | 0.769874                | -2.333710 | 0.634389  |
| 35            | 6             | 0           | -1.475859               | -3.225670 | 0.325148  |
| 36            | 8             | 0           | -0.386984               | -3.006977 | 1.107602  |
| 37            | 8             | 0           | -0.448036               | -1.886917 | -2.867781 |
| 38            | 6             | 0           | 1.693882                | -1.073254 | -1.207833 |
| 39            | 6             | 0           | 2.695398                | -0.708060 | -0.160515 |
| 40            | 1             | 0           | 1.560850                | -3.089848 | 0.673359  |
| 41            | 1             | 0           | 1.724634                | -0.665167 | -2.210247 |
| 42            | 6             | 0           | 3.789340                | 0.208361  | -0.653162 |
| 43            | 8             | 0           | 3.633747                | 1.177013  | -1.366123 |
| 44            | 1             | 0           | 3.191621                | -1.600498 | 0.235465  |
| 45            | 8             | 0           | 4.986682                | -0.176435 | -0.209788 |
| 46            | 6             | 0           | 6.080856                | 0.667625  | -0.605483 |
| 47            | 1             | 0           | 6.156611                | 0.692685  | -1.690315 |
| 48            | 1             | 0           | 5.924418                | 1.677243  | -0.230742 |
| 49            | 1             | 0           | 6.964749                | 0.221109  | -0.162687 |

Imaginary frequency: none  
Electronic energy  $E = -1490.21574$  a.u.  
Enthalpy  $H = -1490.18778$  a.u.  
Entropy  $S = 182.531$  cal/mol/K  
Gibbs free energy  $G = -1490.27451$  a.u.  
Total free energy in solution  $E_{\text{sol}} = -1491.10112$  a.u.



|    |   |   |           |           |           |
|----|---|---|-----------|-----------|-----------|
| 50 | 6 | 0 | -2.732077 | -3.160840 | -1.738801 |
| 51 | 6 | 0 | -3.797466 | -3.792433 | -1.125475 |
| 52 | 6 | 0 | -3.696267 | -4.142081 | 0.225953  |
| 53 | 6 | 0 | -2.548749 | -3.865595 | 0.950600  |
| 54 | 1 | 0 | -2.761537 | -2.867673 | -2.780231 |
| 55 | 1 | 0 | -4.699111 | -4.013278 | -1.680281 |
| 56 | 1 | 0 | -4.523986 | -4.637190 | 0.718021  |
| 57 | 1 | 0 | -2.453628 | -4.133753 | 1.994077  |

**cis-endo-4a**

Standard orientation:

| Center Number | Atomic Number | Atomic Type | Coordinates (Angstroms) |           |           |
|---------------|---------------|-------------|-------------------------|-----------|-----------|
|               |               |             | X                       | Y         | Z         |
| 1             | 6             | 0           | -0.354027               | -1.639321 | 0.291221  |
| 2             | 6             | 0           | 0.316408                | -1.476484 | 1.320543  |
| 3             | 6             | 0           | -0.649361               | -2.451911 | -0.889065 |
| 4             | 6             | 0           | 0.976966                | -0.848653 | 2.412533  |
| 5             | 8             | 0           | -1.774687               | -3.170157 | -0.738031 |
| 6             | 8             | 0           | 0.043837                | -2.471280 | -1.891008 |
| 7             | 8             | 0           | 1.929440                | -0.079267 | 2.288092  |
| 8             | 8             | 0           | 0.464269                | -1.207221 | 3.612216  |
| 9             | 6             | 0           | -2.168408               | -3.964932 | -1.873148 |
| 10            | 6             | 0           | 1.079759                | -0.603827 | 4.762092  |
| 11            | 1             | 0           | -3.084564               | -4.468619 | -1.564267 |
| 12            | 1             | 0           | -1.390040               | -4.692762 | -2.117036 |
| 13            | 1             | 0           | 0.534408                | -1.002290 | 5.618303  |
| 14            | 1             | 0           | 2.138063                | -0.874688 | 4.818666  |
| 15            | 1             | 0           | 0.987056                | 0.485138  | 4.720699  |
| 16            | 6             | 0           | 0.339052                | 1.126387  | -0.902884 |
| 17            | 7             | 0           | 1.453448                | 1.006844  | -1.186492 |
| 18            | 6             | 0           | 2.864264                | 0.807049  | -1.398976 |
| 19            | 6             | 0           | 3.202456                | -0.687533 | -1.234310 |
| 20            | 6             | 0           | 4.709836                | -0.900581 | -1.446557 |
| 21            | 6             | 0           | 5.175344                | 1.460245  | -0.640633 |
| 22            | 6             | 0           | 5.546177                | -0.024421 | -0.500703 |
| 23            | 1             | 0           | 2.917008                | -0.993294 | -0.221428 |
| 24            | 1             | 0           | 2.609666                | -1.284640 | -1.934765 |
| 25            | 1             | 0           | 4.973602                | -0.672182 | -2.490709 |
| 26            | 1             | 0           | 4.942651                | -1.961262 | -1.292986 |
| 27            | 1             | 0           | 5.734492                | 2.065766  | 0.083067  |
| 28            | 1             | 0           | 5.372542                | -0.343988 | 0.536512  |
| 29            | 1             | 0           | 6.615829                | -0.164772 | -0.701994 |
| 30            | 6             | 0           | 3.669727                | 1.695096  | -0.429751 |
| 31            | 1             | 0           | 3.412621                | 2.748467  | -0.592535 |
| 32            | 1             | 0           | 3.380102                | 1.432397  | 0.594751  |
| 33            | 1             | 0           | 5.467562                | 1.819330  | -1.639335 |
| 34            | 6             | 0           | -1.508602               | 2.640619  | -0.481099 |
| 35            | 6             | 0           | -1.032643               | 1.223838  | -0.538503 |
| 36            | 6             | 0           | -1.669912               | 0.049540  | -0.288743 |
| 37            | 6             | 0           | -3.038872               | -0.076665 | 0.183462  |
| 38            | 8             | 0           | -2.790126               | 2.739530  | -0.110693 |
| 39            | 8             | 0           | -0.791813               | 3.589364  | -0.755515 |
| 40            | 8             | 0           | -3.341860               | -0.143059 | 1.363928  |
| 41            | 8             | 0           | -3.916417               | -0.243745 | -0.839364 |
| 42            | 6             | 0           | -3.320766               | 4.075868  | -0.014217 |
| 43            | 6             | 0           | -5.278027               | -0.496011 | -0.449632 |
| 44            | 1             | 0           | -3.278860               | 4.570067  | -0.988272 |
| 45            | 1             | 0           | -4.352344               | 3.949063  | 0.313441  |
| 46            | 1             | 0           | -2.750819               | 4.656222  | 0.715632  |

Imaginary frequency: none  
 Electronic energy  $E = -1490.21586$  a.u.  
 Enthalpy  $H = -1490.18651$  a.u.  
 Entropy  $S = 188.540$  cal/mol/K  
 Gibbs free energy  $G = -1490.27609$  a.u.  
 Total free energy in solution  $E_{\text{sol}} = -1491.11304$  a.u.

|    |   |   |           |           |           |
|----|---|---|-----------|-----------|-----------|
| 47 | 1 | 0 | -5.826085 | -0.619730 | -1.384670 |
| 48 | 1 | 0 | -5.340890 | -1.402838 | 0.158256  |
| 49 | 1 | 0 | -5.676983 | 0.347824  | 0.120420  |
| 50 | 1 | 0 | 3.055282  | 1.117891  | -2.434734 |
| 51 | 1 | 0 | -2.351801 | -3.322137 | -2.738351 |

**cis-endo-3a'**

Standard orientation:

| Center Number | Atomic Number | Atomic Type | Coordinates (Angstroms) |           |           |
|---------------|---------------|-------------|-------------------------|-----------|-----------|
|               |               |             | X                       | Y         | Z         |
| 1             | 6             | 0           | -0.071617               | -2.083586 | 1.696422  |
| 2             | 6             | 0           | 0.949543                | -2.915285 | 1.032084  |
| 3             | 6             | 0           | -1.117359               | -1.549412 | 0.795621  |
| 4             | 6             | 0           | -1.137683               | -1.845432 | -0.676505 |
| 5             | 6             | 0           | 0.906382                | -3.128718 | -0.348668 |
| 6             | 8             | 0           | -0.030509               | -2.595202 | -1.179849 |
| 7             | 8             | 0           | -0.066291               | -1.858848 | 2.892588  |
| 8             | 6             | 0           | -2.074165               | -0.728374 | 1.231164  |
| 9             | 6             | 0           | -3.058228               | -0.275211 | 0.193334  |
| 10            | 1             | 0           | -2.033054               | -2.421517 | -0.938457 |
| 11            | 1             | 0           | -2.135862               | -0.407538 | 2.263145  |
| 12            | 6             | 0           | -4.049735               | 0.730773  | 0.756041  |
| 13            | 8             | 0           | -3.897542               | 1.357494  | 1.774985  |
| 14            | 8             | 0           | -5.138164               | 0.819711  | -0.016139 |
| 15            | 6             | 0           | -6.113645               | 1.771206  | 0.435265  |
| 16            | 1             | 0           | -5.674136               | 2.766721  | 0.470720  |
| 17            | 1             | 0           | -6.919210               | 1.728572  | -0.290501 |
| 18            | 1             | 0           | -6.467523               | 1.500451  | 1.427899  |
| 19            | 1             | 0           | -3.666356               | -1.140797 | -0.100881 |
| 20            | 6             | 0           | 1.980256                | -3.488408 | 1.784055  |
| 21            | 6             | 0           | 2.954347                | -4.261543 | 1.178413  |
| 22            | 6             | 0           | 2.899084                | -4.467545 | -0.203618 |
| 23            | 6             | 0           | 1.885748                | -3.909069 | -0.967281 |
| 24            | 1             | 0           | 1.982098                | -3.296341 | 2.849073  |
| 25            | 1             | 0           | 3.750054                | -4.700869 | 1.764470  |
| 26            | 1             | 0           | 3.653867                | -5.072780 | -0.689837 |
| 27            | 1             | 0           | 1.824006                | -4.068430 | -2.035875 |
| 28            | 7             | 0           | -2.420521               | 0.230466  | -1.048648 |
| 29            | 6             | 0           | -1.196797               | -0.500236 | -1.459764 |
| 30            | 6             | 0           | -1.280627               | -0.787874 | -2.962668 |
| 31            | 6             | 0           | -2.274598               | 1.689201  | -1.121656 |
| 32            | 1             | 0           | -0.387752               | -1.303273 | -3.316154 |
| 33            | 1             | 0           | -1.380019               | 0.149268  | -3.510514 |
| 34            | 1             | 0           | -2.156928               | -1.405097 | -3.166782 |
| 35            | 6             | 0           | 0.037866                | 0.299189  | -1.116501 |
| 36            | 6             | 0           | -1.199963               | 2.261719  | -0.193664 |
| 37            | 6             | 0           | 0.061888                | 1.524746  | -0.506742 |
| 38            | 7             | 0           | 1.326567                | -0.111631 | -1.379121 |
| 39            | 6             | 0           | 2.201740                | 0.846010  | -0.914468 |
| 40            | 6             | 0           | 1.439113                | 1.896466  | -0.363490 |
| 41            | 1             | 0           | 1.581566                | -1.005773 | -1.757357 |
| 42            | 1             | 0           | -2.007686               | 1.929116  | -2.153334 |
| 43            | 1             | 0           | -3.251980               | 2.137368  | -0.943277 |
| 44            | 1             | 0           | -1.084598               | 3.332984  | -0.384432 |
| 45            | 1             | 0           | -1.500296               | 2.150828  | 0.853297  |
| 46            | 6             | 0           | 3.599273                | 0.886270  | -0.932220 |
| 47            | 6             | 0           | 2.082720                | 3.025845  | 0.174965  |
| 48            | 6             | 0           | 3.466073                | 3.061121  | 0.151599  |
| 49            | 6             | 0           | 4.216314                | 1.997025  | -0.396790 |

Imaginary frequency: none  
 Electronic energy  $E = -1490.213372$  a.u.  
 Enthalpy  $H = -1490.18530$  a.u.  
 Entropy  $S = 179.937$  cal/mol/K  
 Gibbs free energy  $G = -1490.27079$  a.u.  
 Total free energy in solution  $E_{sol} = -1491.09875$  a.u.

|    |   |   |          |          |           |
|----|---|---|----------|----------|-----------|
| 50 | 8 | 0 | 4.220729 | 4.091215 | 0.640794  |
| 51 | 6 | 0 | 3.523282 | 5.180966 | 1.205212  |
| 52 | 1 | 0 | 1.497523 | 3.829015 | 0.599895  |
| 53 | 1 | 0 | 4.182970 | 0.075214 | -1.349327 |
| 54 | 1 | 0 | 5.294226 | 2.085440 | -0.380476 |
| 55 | 1 | 0 | 2.872629 | 5.658903 | 0.466942  |
| 56 | 1 | 0 | 4.280459 | 5.888513 | 1.533715  |
| 57 | 1 | 0 | 2.922611 | 4.864159 | 2.062563  |

**cis-exo-3a**

Standard orientation:

| Center Number | Atomic Number | Atomic Type | Coordinates (Angstroms) |           |           |
|---------------|---------------|-------------|-------------------------|-----------|-----------|
|               |               |             | X                       | Y         | Z         |
| 1             | 6             | 0           | 1.372733                | 0.572373  | 0.493479  |
| 2             | 7             | 0           | -0.887516               | 0.148877  | 1.300837  |
| 3             | 6             | 0           | 0.066984                | 1.213634  | 0.907864  |
| 4             | 6             | 0           | 0.248203                | 2.135756  | 2.125459  |
| 5             | 6             | 0           | 1.704594                | -0.749226 | 0.645291  |
| 6             | 6             | 0           | -0.242897               | -0.907457 | 2.102746  |
| 7             | 6             | 0           | 0.795640                | -1.722313 | 1.325946  |
| 8             | 1             | 0           | 1.025554                | 2.877914  | 1.936158  |
| 9             | 1             | 0           | 0.553860                | 1.561681  | 2.997372  |
| 10            | 1             | 0           | -0.695075               | 2.636885  | 2.343866  |
| 11            | 6             | 0           | 3.020145                | -0.914473 | 0.096942  |
| 12            | 6             | 0           | 3.429329                | 0.353051  | -0.366496 |
| 13            | 7             | 0           | 2.410630                | 1.245278  | -0.109770 |
| 14            | 1             | 0           | 2.388028                | 2.220094  | -0.359906 |
| 15            | 1             | 0           | -1.028131               | -1.539433 | 2.506020  |
| 16            | 1             | 0           | 0.249564                | -0.421169 | 2.943711  |
| 17            | 1             | 0           | 0.304340                | -2.393057 | 0.612817  |
| 18            | 1             | 0           | 1.351556                | -2.357230 | 2.021994  |
| 19            | 6             | 0           | 3.876439                | -2.023039 | -0.032542 |
| 20            | 6             | 0           | 5.111455                | -1.827498 | -0.626266 |
| 21            | 6             | 0           | 5.506213                | -0.552623 | -1.089444 |
| 22            | 6             | 0           | 4.678519                | 0.543466  | -0.965666 |
| 23            | 8             | 0           | 6.040396                | -2.811648 | -0.818824 |
| 24            | 6             | 0           | 5.704397                | -4.105823 | -0.365991 |
| 25            | 1             | 0           | 6.556746                | -4.739177 | -0.598491 |
| 26            | 1             | 0           | 4.816410                | -4.486425 | -0.879023 |
| 27            | 1             | 0           | 5.527477                | -4.113289 | 0.713462  |
| 28            | 1             | 0           | 3.561174                | -2.993458 | 0.323946  |
| 29            | 1             | 0           | 6.483652                | -0.467132 | -1.544696 |
| 30            | 1             | 0           | 4.992561                | 1.516133  | -1.323116 |
| 31            | 6             | 0           | -3.898542               | 0.431752  | -0.849378 |
| 32            | 6             | 0           | -4.381373               | -0.938830 | -0.608613 |
| 33            | 6             | 0           | -2.507750               | 0.690640  | -0.397335 |
| 34            | 6             | 0           | -1.672247               | -0.403722 | 0.203208  |
| 35            | 8             | 0           | -2.456279               | -1.453743 | 0.771873  |
| 36            | 8             | 0           | -4.572540               | 1.286377  | -1.396131 |
| 37            | 6             | 0           | -1.949490               | 1.882872  | -0.576355 |
| 38            | 6             | 0           | -0.489631               | 2.066804  | -0.310837 |
| 39            | 1             | 0           | -1.042273               | -0.871889 | -0.571920 |
| 40            | 1             | 0           | -2.527283               | 2.698106  | -0.993399 |
| 41            | 6             | 0           | -0.187689               | 3.546385  | -0.159969 |
| 42            | 8             | 0           | -0.986976               | 4.389430  | 0.151194  |
| 43            | 1             | 0           | 0.047860                | 1.726373  | -1.202949 |
| 44            | 8             | 0           | 1.103958                | 3.835870  | -0.432871 |
| 45            | 6             | 0           | 1.452314                | 5.221524  | -0.262579 |
| 46            | 1             | 0           | 0.855817                | 5.836411  | -0.932145 |

Imaginary frequency: none  
 Electronic energy  $E = -1490.21797$  a.u.  
 Enthalpy  $H = -1490.18995$  a.u.  
 Entropy  $S = 181.560$  cal/mol/K  
 Gibbs free energy  $G = -1490.276215$  a.u.  
 Total free energy in solution  $E_{\text{sol}} = -1491.10479$  a.u.

|    |   |   |           |           |           |
|----|---|---|-----------|-----------|-----------|
| 47 | 1 | 0 | 1.269248  | 5.524564  | 0.766383  |
| 48 | 1 | 0 | 2.507440  | 5.290354  | -0.507358 |
| 49 | 6 | 0 | -3.628467 | -1.809744 | 0.184125  |
| 50 | 6 | 0 | -5.606024 | -1.363361 | -1.133581 |
| 51 | 6 | 0 | -6.075472 | -2.638998 | -0.877342 |
| 52 | 6 | 0 | -5.315156 | -3.499550 | -0.077804 |
| 53 | 6 | 0 | -4.099844 | -3.095389 | 0.452408  |
| 54 | 1 | 0 | -3.501927 | -3.748478 | 1.073503  |
| 55 | 1 | 0 | -5.675971 | -4.498811 | 0.131360  |
| 56 | 1 | 0 | -7.021344 | -2.968362 | -1.285714 |
| 57 | 1 | 0 | -6.163858 | -0.657248 | -1.734904 |

**cis-exo-4a**

Standard orientation:

| Center Number | Atomic Number | Atomic Type | Coordinates (Angstroms) |           |           |
|---------------|---------------|-------------|-------------------------|-----------|-----------|
|               |               |             | X                       | Y         | Z         |
| 1             | 6             | 0           | 1.566770                | 0.303214  | 0.498642  |
| 2             | 7             | 0           | -0.684141               | -0.473879 | 0.730714  |
| 3             | 6             | 0           | 0.155869                | 0.763388  | 0.824780  |
| 4             | 6             | 0           | 0.060627                | 1.297284  | 2.266580  |
| 5             | 6             | 0           | 1.969738                | -0.987680 | 0.256715  |
| 6             | 6             | 0           | -0.109047               | -1.720223 | 1.246777  |
| 7             | 6             | 0           | 1.046484                | -2.158756 | 0.356739  |
| 8             | 1             | 0           | 0.668157                | 2.194407  | 2.368595  |
| 9             | 1             | 0           | 0.412621                | 0.553638  | 2.982554  |
| 10            | 1             | 0           | -0.978496               | 1.549933  | 2.485549  |
| 11            | 6             | 0           | 3.382955                | -0.952704 | 0.026735  |
| 12            | 6             | 0           | 3.778066                | 0.392755  | 0.156528  |
| 13            | 7             | 0           | 2.657863                | 1.134172  | 0.454215  |
| 14            | 1             | 0           | 2.603877                | 2.132122  | 0.559810  |
| 15            | 1             | 0           | -0.907080               | -2.460094 | 1.286706  |
| 16            | 1             | 0           | 0.254829                | -1.552675 | 2.261990  |
| 17            | 1             | 0           | 0.667133                | -2.476198 | -0.619278 |
| 18            | 1             | 0           | 1.551664                | -3.015014 | 0.811284  |
| 19            | 6             | 0           | 4.337595                | -1.944850 | -0.265517 |
| 20            | 6             | 0           | 5.655199                | -1.552625 | -0.423350 |
| 21            | 6             | 0           | 6.036105                | -0.197419 | -0.293707 |
| 22            | 6             | 0           | 5.111911                | 0.783005  | -0.004809 |
| 23            | 8             | 0           | 6.684499                | -2.403021 | -0.711547 |
| 24            | 6             | 0           | 6.363106                | -3.769877 | -0.860565 |
| 25            | 1             | 0           | 7.297289                | -4.277925 | -1.085413 |
| 26            | 1             | 0           | 5.657350                | -3.922063 | -1.682188 |
| 27            | 1             | 0           | 5.938016                | -4.178491 | 0.060715  |
| 28            | 1             | 0           | 4.033316                | -2.976855 | -0.368361 |
| 29            | 1             | 0           | 7.081984                | 0.041725  | -0.430230 |
| 30            | 1             | 0           | 5.415308                | 1.817712  | 0.093324  |
| 31            | 6             | 0           | -3.821651               | 0.491673  | -1.039157 |
| 32            | 6             | 0           | -4.783547               | -0.569576 | -0.585164 |
| 33            | 6             | 0           | -2.501645               | 0.581919  | -0.403467 |
| 34            | 6             | 0           | -1.919506               | -0.486594 | 0.239754  |
| 35            | 8             | 0           | -4.391666               | -0.285918 | 1.804937  |
| 36            | 8             | 0           | -4.135864               | 1.249156  | -1.945090 |
| 37            | 6             | 0           | -1.637926               | 1.690868  | -0.688095 |
| 38            | 6             | 0           | -0.397838               | 1.801209  | -0.166515 |
| 39            | 1             | 0           | -2.006908               | 2.464023  | -1.349578 |
| 40            | 6             | 0           | 0.271431                | 3.081463  | -0.496407 |
| 41            | 8             | 0           | -0.009500               | 3.783355  | -1.437969 |
| 42            | 8             | 0           | 1.201909                | 3.481750  | 0.417804  |
| 43            | 6             | 0           | 1.774558                | 4.771858  | 0.144333  |

Imaginary frequency: none

Electronic energy  $E = -1490.220554$  a.u.

Enthalpy  $H = -1490.191479$  a.u.

Entropy  $S = 186.163$  cal/mol/K

Gibbs free energy  $G = -1490.279931$  a.u.

Total free energy in solution  $E_{\text{sol}} = -1491.11629$  a.u.

|    |   |   |           |           |           |
|----|---|---|-----------|-----------|-----------|
| 44 | 1 | 0 | 2.273085  | 4.764694  | -0.822776 |
| 45 | 1 | 0 | 0.993768  | 5.528727  | 0.137717  |
| 46 | 1 | 0 | 2.481191  | 4.952692  | 0.949257  |
| 47 | 6 | 0 | -5.018359 | -0.895268 | 0.759642  |
| 48 | 6 | 0 | -5.542480 | -1.205561 | -1.573959 |
| 49 | 6 | 0 | -6.467770 | -2.185438 | -1.253569 |
| 50 | 6 | 0 | -6.665490 | -2.521388 | 0.086738  |
| 51 | 6 | 0 | -5.954866 | -1.876824 | 1.087274  |
| 52 | 1 | 0 | -6.116379 | -2.098882 | 2.133662  |
| 53 | 1 | 0 | -7.389030 | -3.281203 | 0.354718  |
| 54 | 1 | 0 | -7.034800 | -2.677389 | -2.032405 |
| 55 | 1 | 0 | -5.378985 | -0.903727 | -2.600500 |
| 56 | 1 | 0 | -3.822181 | 0.420444  | 1.464613  |
| 57 | 1 | 0 | -2.448532 | -1.427361 | 0.338923  |

**cis-exo-3a'**

Standard orientation:

| Center Number | Atomic Number | Atomic Type | Coordinates (Angstroms) |           |           |
|---------------|---------------|-------------|-------------------------|-----------|-----------|
|               |               |             | X                       | Y         | Z         |
| 1             | 6             | 0           | -3.719528               | -0.930832 | -0.855350 |
| 2             | 6             | 0           | -3.377851               | -2.298929 | -0.409437 |
| 3             | 6             | 0           | -2.620511               | 0.063006  | -0.712677 |
| 4             | 6             | 0           | -1.248554               | -0.441780 | -0.364043 |
| 5             | 6             | 0           | -2.190478               | -2.532525 | 0.292784  |
| 6             | 8             | 0           | -1.303783               | -1.534871 | 0.571114  |
| 7             | 8             | 0           | -4.815270               | -0.639560 | -1.298197 |
| 8             | 6             | 0           | -2.850654               | 1.352797  | -0.950454 |
| 9             | 6             | 0           | -1.763144               | 2.384440  | -0.880606 |
| 10            | 1             | 0           | -0.738512               | -0.801297 | -1.263384 |
| 11            | 1             | 0           | -3.847585               | 1.688611  | -1.205813 |
| 12            | 6             | 0           | -2.273745               | 3.509952  | 0.042887  |
| 13            | 8             | 0           | -3.352855               | 4.025710  | -0.115361 |
| 14            | 8             | 0           | -1.405491               | 3.882469  | 0.986180  |
| 15            | 6             | 0           | -1.871796               | 4.940863  | 1.839856  |
| 16            | 1             | 0           | -2.780574               | 4.630691  | 2.351229  |
| 17            | 1             | 0           | -1.067936               | 5.118361  | 2.546918  |
| 18            | 1             | 0           | -2.077662               | 5.831197  | 1.249535  |
| 19            | 1             | 0           | -1.738565               | 2.876084  | -1.863465 |
| 20            | 6             | 0           | -4.268053               | -3.354375 | -0.627395 |
| 21            | 6             | 0           | -3.981118               | -4.624942 | -0.158930 |
| 22            | 6             | 0           | -2.794849               | -4.842246 | 0.548269  |
| 23            | 6             | 0           | -1.900518               | -3.806696 | 0.777209  |
| 24            | 1             | 0           | -5.182306               | -3.135477 | -1.163511 |
| 25            | 1             | 0           | -4.668688               | -5.441518 | -0.332753 |
| 26            | 1             | 0           | -2.563499               | -5.831922 | 0.921401  |
| 27            | 1             | 0           | -0.978199               | -3.964976 | 1.320062  |
| 28            | 7             | 0           | -0.462963               | 1.801506  | -0.658164 |
| 29            | 6             | 0           | -0.384418               | 0.667266  | 0.271192  |
| 30            | 6             | 0           | -0.851100               | 0.975188  | 1.703670  |
| 31            | 6             | 0           | 0.662545                | 2.737272  | -0.650101 |
| 32            | 1             | 0           | -0.708294               | 0.105274  | 2.343605  |
| 33            | 1             | 0           | -1.909098               | 1.241140  | 1.723908  |
| 34            | 1             | 0           | -0.269897               | 1.805006  | 2.102681  |
| 35            | 6             | 0           | 1.046726                | 0.205384  | 0.274379  |
| 36            | 6             | 0           | 1.929547                | 2.052523  | -1.157313 |
| 37            | 6             | 0           | 2.097425                | 0.789553  | -0.375675 |

Imaginary frequency: none  
 Electronic energy  $E = -1490.225776$  a.u.  
 Enthalpy  $H = -1490.197763$  a.u.  
 Entropy  $S = 178.920$  cal/mol/K  
 Gibbs free energy  $G = -1490.282774$  a.u.  
 Total free energy in solution  $E_{\text{sol}} = -1491.11629$  a.u.

|    |   |   |          |           |           |
|----|---|---|----------|-----------|-----------|
| 38 | 7 | 0 | 1.472058 | -0.916817 | 0.946493  |
| 39 | 6 | 0 | 2.819611 | -1.087072 | 0.707813  |
| 40 | 6 | 0 | 3.251115 | -0.022340 | -0.111664 |
| 41 | 1 | 0 | 0.847258 | -1.590866 | 1.353344  |
| 42 | 1 | 0 | 0.390737 | 3.573484  | -1.298165 |
| 43 | 1 | 0 | 0.847524 | 3.144113  | 0.349455  |
| 44 | 1 | 0 | 1.840832 | 1.848326  | -2.228473 |
| 45 | 1 | 0 | 2.784268 | 2.720369  | -1.016888 |
| 46 | 6 | 0 | 4.600935 | 0.067313  | -0.497135 |
| 47 | 6 | 0 | 5.471160 | -0.916846 | -0.060410 |
| 48 | 6 | 0 | 5.022872 | -1.981063 | 0.752759  |
| 49 | 6 | 0 | 3.704151 | -2.077329 | 1.145157  |
| 50 | 8 | 0 | 6.804176 | -0.958094 | -0.361924 |
| 51 | 6 | 0 | 7.309569 | 0.083946  | -1.168617 |
| 52 | 1 | 0 | 3.372723 | -2.894760 | 1.773218  |
| 53 | 1 | 0 | 5.753297 | -2.717602 | 1.059323  |
| 54 | 1 | 0 | 4.930466 | 0.884544  | -1.123122 |
| 55 | 1 | 0 | 7.171705 | 1.057367  | -0.689313 |
| 56 | 1 | 0 | 8.371671 | -0.113801 | -1.289523 |
| 57 | 1 | 0 | 6.826405 | 0.094437  | -2.150083 |

**trans-endo-TSa**

Standard orientation:

| Center Number | Atomic Number | Atomic Type | Coordinates (Angstroms) |           |           |
|---------------|---------------|-------------|-------------------------|-----------|-----------|
|               |               |             | X                       | Y         | Z         |
| 1             | 6             | 0           | -1.035483               | -0.766205 | -1.386385 |
| 2             | 7             | 0           | 1.337472                | -0.755782 | -1.444802 |
| 3             | 6             | 0           | 0.230756                | -1.449788 | -1.513959 |
| 4             | 6             | 0           | 0.246774                | -2.907131 | -1.881551 |
| 5             | 6             | 0           | -1.150875               | 0.548519  | -0.998675 |
| 6             | 6             | 0           | 1.239844                | 0.715526  | -1.517631 |
| 7             | 6             | 0           | 0.075602                | 1.371306  | -0.763163 |
| 8             | 1             | 0           | -0.442228               | -3.487899 | -1.267532 |
| 9             | 1             | 0           | 1.248603                | -3.327038 | -1.815450 |
| 10            | 1             | 0           | -0.068599               | -2.983746 | -2.926854 |
| 11            | 6             | 0           | -2.539505               | 0.796754  | -0.795668 |
| 12            | 6             | 0           | -3.210341               | -0.414118 | -1.084151 |
| 13            | 7             | 0           | -2.283360               | -1.353140 | -1.479738 |
| 14            | 1             | 0           | -2.429409               | -2.342970 | -1.347452 |
| 15            | 1             | 0           | 1.129063                | 0.934630  | -2.583340 |
| 16            | 1             | 0           | 2.193160                | 1.127531  | -1.196181 |
| 17            | 1             | 0           | -0.042245               | 2.388205  | -1.146209 |
| 18            | 1             | 0           | 0.284419                | 1.453759  | 0.307912  |
| 19            | 6             | 0           | -3.265921               | 1.931040  | -0.378912 |
| 20            | 6             | 0           | -4.635583               | 1.809869  | -0.247482 |
| 21            | 6             | 0           | -5.294114               | 0.587834  | -0.532687 |
| 22            | 6             | 0           | -4.601350               | -0.524051 | -0.956026 |
| 23            | 8             | 0           | -5.466086               | 2.812624  | 0.155174  |
| 24            | 6             | 0           | -4.866346               | 4.054351  | 0.467104  |
| 25            | 1             | 0           | -4.358316               | 4.475589  | -0.404804 |
| 26            | 1             | 0           | -4.151838               | 3.950669  | 1.288189  |
| 27            | 1             | 0           | -2.747945               | 2.854272  | -0.163219 |
| 28            | 1             | 0           | -6.368511               | 0.563382  | -0.409495 |
| 29            | 1             | 0           | -5.115857               | -1.450634 | -1.175755 |
| 30            | 1             | 0           | -5.675873               | 4.713108  | 0.769671  |
| 31            | 6             | 0           | 2.738551                | 0.521433  | 1.409438  |
| 32            | 6             | 0           | 3.990409                | 0.907422  | 0.707931  |
| 33            | 6             | 0           | 2.150731                | -0.720938 | 0.959606  |
| 34            | 6             | 0           | 2.593700                | -1.313791 | -0.263277 |

Imaginary frequency: -310.5476 cm<sup>-1</sup>  
 Electronic energy  $E = -1490.186174$  a.u.  
 Enthalpy  $H = -1490.157544$  a.u.  
 Entropy  $S = 181.697$  cal/mol/K  
 Gibbs free energy  $G = -1490.243874$  a.u.  
 Total free energy in solution  $E_{\text{sol}} = -1491.07382$  a.u.

|    |   |   |           |           |           |
|----|---|---|-----------|-----------|-----------|
| 35 | 6 | 0 | 4.461787  | 0.142180  | -0.356376 |
| 36 | 8 | 0 | 3.798211  | -0.974267 | -0.804715 |
| 37 | 8 | 0 | 2.270254  | 1.222612  | 2.305005  |
| 38 | 6 | 0 | 0.923174  | -1.147152 | 1.531761  |
| 39 | 6 | 0 | 0.242289  | -2.265543 | 1.162412  |
| 40 | 1 | 0 | 2.435153  | -2.371548 | -0.413883 |
| 41 | 1 | 0 | 0.471408  | -0.455361 | 2.234757  |
| 42 | 6 | 0 | -1.174229 | -2.483869 | 1.421538  |
| 43 | 8 | 0 | -1.845667 | -3.309911 | 0.816631  |
| 44 | 1 | 0 | 0.693415  | -3.038381 | 0.559561  |
| 45 | 8 | 0 | -1.704433 | -1.648801 | 2.328053  |
| 46 | 6 | 0 | -3.120751 | -1.755688 | 2.499504  |
| 47 | 1 | 0 | -3.632706 | -1.467524 | 1.581968  |
| 48 | 1 | 0 | -3.393853 | -2.775413 | 2.763842  |
| 49 | 1 | 0 | -3.368302 | -1.068297 | 3.302682  |
| 50 | 6 | 0 | 4.715654  | 2.034433  | 1.100620  |
| 51 | 6 | 0 | 5.889403  | 2.378185  | 0.449022  |
| 52 | 6 | 0 | 6.347659  | 1.591304  | -0.611608 |
| 53 | 6 | 0 | 5.637325  | 0.472270  | -1.022675 |
| 54 | 1 | 0 | 7.264685  | 1.854057  | -1.123272 |
| 55 | 1 | 0 | 6.450552  | 3.249745  | 0.759043  |
| 56 | 1 | 0 | 4.324520  | 2.612597  | 1.927508  |
| 57 | 1 | 0 | 5.968712  | -0.149232 | -1.843348 |

### trans-exo-TS1a

Standard orientation:

| Center Number | Atomic Number | Atomic Type | Coordinates (Angstroms) |           |           |
|---------------|---------------|-------------|-------------------------|-----------|-----------|
|               |               |             | X                       | Y         | Z         |
| 1             | 6             | 0           | -1.097144               | -1.211753 | -0.298609 |
| 2             | 7             | 0           | 0.754641                | -0.583250 | 1.009948  |
| 3             | 6             | 0           | 0.316147                | -0.953307 | -0.152214 |
| 4             | 6             | 0           | 1.212847                | -1.079452 | -1.345564 |
| 5             | 6             | 0           | -2.033223               | -0.752809 | 0.604322  |
| 6             | 6             | 0           | -0.170041               | -0.588928 | 2.154285  |
| 7             | 6             | 0           | -1.565421               | -0.046306 | 1.834456  |
| 8             | 1             | 0           | 1.343300                | -0.102416 | -1.816635 |
| 9             | 1             | 0           | 0.772239                | -1.758809 | -2.074291 |
| 10            | 1             | 0           | 2.193595                | -1.459030 | -1.071706 |
| 11            | 6             | 0           | -3.315147               | -1.011861 | 0.048828  |
| 12            | 6             | 0           | -3.091826               | -1.654017 | -1.191698 |
| 13            | 7             | 0           | -1.739850               | -1.748390 | -1.395864 |
| 14            | 1             | 0           | -1.305317               | -2.201522 | -2.179120 |
| 15            | 1             | 0           | 0.295724                | -0.023654 | 2.960888  |
| 16            | 1             | 0           | -0.261271               | -1.629224 | 2.481489  |
| 17            | 1             | 0           | -1.563588               | 1.036795  | 1.671816  |
| 18            | 1             | 0           | -2.214151               | -0.250326 | 2.688439  |
| 19            | 6             | 0           | -4.630513               | -0.764329 | 0.497703  |
| 20            | 6             | 0           | -5.673630               | -1.178087 | -0.303878 |
| 21            | 6             | 0           | -5.432832               | -1.835025 | -1.540050 |
| 22            | 6             | 0           | -4.160496               | -2.080672 | -1.995452 |
| 23            | 1             | 0           | -4.793484               | -0.261766 | 1.439894  |
| 24            | 1             | 0           | -3.995124               | -2.577399 | -2.942609 |
| 25            | 1             | 0           | -6.298264               | -2.133763 | -2.116116 |
| 26            | 8             | 0           | -6.991268               | -1.011373 | -0.010528 |
| 27            | 6             | 0           | -7.299855               | -0.349068 | 1.201411  |
| 28            | 1             | 0           | -6.916783               | -0.906367 | 2.060689  |
| 29            | 1             | 0           | -8.384138               | -0.301973 | 1.251707  |
| 30            | 1             | 0           | -6.887187               | 0.663147  | 1.210186  |
| 31            | 6             | 0           | 3.718523                | 0.726026  | -0.698966 |

Imaginary frequency: -228.1083 cm<sup>-1</sup>  
 Electronic energy  $E = -1490.179742$  a.u.  
 Enthalpy  $H = -1490.150633$  a.u.  
 Entropy  $S = 188.148$  cal/mol/K  
 Gibbs free energy  $G = -1490.240028$  a.u.  
 Total free energy in solution  $E_{\text{sol}} = -1491.07382$  a.u.

|    |   |   |           |           |           |
|----|---|---|-----------|-----------|-----------|
| 32 | 6 | 0 | 4.456815  | -0.518238 | -0.339392 |
| 33 | 6 | 0 | 2.658699  | 1.068742  | 0.199434  |
| 34 | 6 | 0 | 2.313060  | 0.210118  | 1.293941  |
| 35 | 6 | 0 | 4.135694  | -1.227055 | 0.816007  |
| 36 | 8 | 0 | 3.156015  | -0.799645 | 1.680388  |
| 37 | 8 | 0 | 4.021997  | 1.358132  | -1.713745 |
| 38 | 6 | 0 | 1.831508  | 2.196890  | -0.068760 |
| 39 | 6 | 0 | 0.715652  | 2.538283  | 0.624650  |
| 40 | 1 | 0 | 1.959197  | 0.717462  | 2.186738  |
| 41 | 1 | 0 | 2.120685  | 2.788081  | -0.930890 |
| 42 | 6 | 0 | -0.183109 | 3.630560  | 0.288898  |
| 43 | 8 | 0 | -1.239714 | 3.839103  | 0.859634  |
| 44 | 1 | 0 | 0.388182  | 1.986796  | 1.494336  |
| 45 | 8 | 0 | 0.240799  | 4.395864  | -0.741984 |
| 46 | 6 | 0 | -0.652864 | 5.447902  | -1.103894 |
| 47 | 1 | 0 | -1.621030 | 5.042936  | -1.395636 |
| 48 | 1 | 0 | -0.795511 | 6.130773  | -0.267622 |
| 49 | 1 | 0 | -0.182476 | 5.958357  | -1.939520 |
| 50 | 6 | 0 | 5.477226  | -1.001613 | -1.160326 |
| 51 | 6 | 0 | 6.161698  | -2.161007 | -0.829423 |
| 52 | 6 | 0 | 5.826755  | -2.852277 | 0.337864  |
| 53 | 6 | 0 | 4.812252  | -2.391335 | 1.166173  |
| 54 | 1 | 0 | 5.705068  | -0.429909 | -2.050568 |
| 55 | 1 | 0 | 6.953796  | -2.528186 | -1.468634 |
| 56 | 1 | 0 | 6.358947  | -3.756846 | 0.603493  |
| 57 | 1 | 0 | 4.536768  | -2.906601 | 2.076484  |

**trans-exo-IM1a**

Standard orientation:

| Center Number | Atomic Number | Atomic Type | Coordinates (Angstroms) |           |           |
|---------------|---------------|-------------|-------------------------|-----------|-----------|
|               |               |             | X                       | Y         | Z         |
| 1             | 6             | 0           | -1.080408               | -1.239771 | -0.222710 |
| 2             | 7             | 0           | 0.733868                | -0.429150 | 1.020932  |
| 3             | 6             | 0           | 0.320104                | -0.946115 | -0.104007 |
| 4             | 6             | 0           | 1.223711                | -1.191626 | -1.269276 |
| 5             | 6             | 0           | -2.036022               | -0.682024 | 0.607237  |
| 6             | 6             | 0           | -0.205772               | -0.349419 | 2.159590  |
| 7             | 6             | 0           | -1.591792               | 0.153274  | 1.761350  |
| 8             | 1             | 0           | 1.392635                | -0.252582 | -1.800914 |
| 9             | 1             | 0           | 0.765353                | -1.905184 | -1.951701 |
| 10            | 1             | 0           | 2.190895                | -1.578622 | -0.959382 |
| 11            | 6             | 0           | -3.305014               | -1.001667 | 0.061911  |
| 12            | 6             | 0           | -3.059776               | -1.779228 | -1.094716 |
| 13            | 7             | 0           | -1.706941               | -1.893736 | -1.266532 |
| 14            | 1             | 0           | -1.262711               | -2.448339 | -1.975840 |
| 15            | 1             | 0           | 0.246180                | 0.291916  | 2.912157  |
| 16            | 1             | 0           | -0.291428               | -1.359399 | 2.570874  |
| 17            | 1             | 0           | -1.583198               | 1.214078  | 1.488913  |
| 18            | 1             | 0           | -2.254478               | 0.036504  | 2.620785  |
| 19            | 6             | 0           | -4.628057               | -0.703487 | 0.458199  |
| 20            | 6             | 0           | -5.656596               | -1.205470 | -0.309360 |
| 21            | 6             | 0           | -5.393458               | -1.999842 | -1.459657 |
| 22            | 6             | 0           | -4.115720               | -2.295676 | -1.863580 |
| 23            | 1             | 0           | -4.805914               | -0.096894 | 1.334149  |
| 24            | 1             | 0           | -3.935211               | -2.895999 | -2.745680 |
| 25            | 1             | 0           | -6.249806               | -2.361776 | -2.012683 |
| 26            | 8             | 0           | -6.977668               | -1.007703 | -0.064414 |
| 27            | 6             | 0           | -7.311237               | -0.205162 | 1.053818  |
| 28            | 1             | 0           | -6.947723               | -0.656507 | 1.980743  |

Imaginary frequency: none  
 Electronic energy  $E = -1490.180065$  a.u.  
 Enthalpy  $H = -1490.150652$  a.u.  
 Entropy  $S = 189.232$  cal/mol/K  
 Gibbs free energy  $G = -1490.240562$  a.u.  
 Total free energy in solution  $E_{\text{sol}} = -1491.07835$  a.u.



|    |   |   |           |           |           |
|----|---|---|-----------|-----------|-----------|
| 29 | 1 | 0 | -8.396105 | -0.153754 | 1.074254  |
| 30 | 1 | 0 | -6.896738 | 0.800679  | 0.949809  |
| 31 | 6 | 0 | 3.703219  | 0.695187  | -0.698238 |
| 32 | 6 | 0 | 4.433399  | -0.551481 | -0.320104 |
| 33 | 6 | 0 | 2.600621  | 1.024111  | 0.141047  |
| 34 | 6 | 0 | 2.176182  | 0.149011  | 1.246360  |
| 35 | 6 | 0 | 4.041812  | -1.303352 | 0.785331  |
| 36 | 8 | 0 | 2.986297  | -0.941767 | 1.587381  |
| 37 | 8 | 0 | 4.064884  | 1.340332  | -1.689160 |
| 38 | 6 | 0 | 1.829402  | 2.180010  | -0.115596 |
| 39 | 6 | 0 | 0.737780  | 2.587815  | 0.594505  |
| 40 | 1 | 0 | 2.010794  | 0.711753  | 2.166860  |
| 41 | 1 | 0 | 2.138161  | 2.757155  | -0.980778 |
| 42 | 6 | 0 | -0.124150 | 3.698472  | 0.251586  |
| 43 | 8 | 0 | -1.170114 | 3.954981  | 0.828569  |
| 44 | 1 | 0 | 0.410175  | 2.076312  | 1.487433  |
| 45 | 8 | 0 | 0.308253  | 4.432638  | -0.801877 |
| 46 | 6 | 0 | -0.559073 | 5.501567  | -1.172817 |
| 47 | 1 | 0 | -1.542536 | 5.120393  | -1.445743 |
| 48 | 1 | 0 | -0.672922 | 6.205166  | -0.349304 |
| 49 | 1 | 0 | -0.085237 | 5.982721  | -2.024044 |
| 50 | 6 | 0 | 5.517428  | -0.991189 | -1.080067 |
| 51 | 6 | 0 | 6.199870  | -2.150632 | -0.741301 |
| 52 | 6 | 0 | 5.794006  | -2.886721 | 0.373367  |
| 53 | 6 | 0 | 4.713874  | -2.469291 | 1.140941  |
| 54 | 1 | 0 | 5.795241  | -0.384509 | -1.932159 |
| 55 | 1 | 0 | 7.042361  | -2.481827 | -1.334210 |
| 56 | 1 | 0 | 6.321467  | -3.791562 | 0.648008  |
| 57 | 1 | 0 | 4.383038  | -3.021150 | 2.010776  |

**trans-exo-TS2a**

Standard orientation:

| Center Number | Atomic Number | Atomic Type | Coordinates (Angstroms) |           |           |
|---------------|---------------|-------------|-------------------------|-----------|-----------|
|               |               |             | X                       | Y         | Z         |
| 1             | 6             | 0           | 1.059558                | -0.491759 | 0.676446  |
| 2             | 7             | 0           | -1.056351               | -1.068304 | -0.203298 |
| 3             | 6             | 0           | -0.363509               | -0.298686 | 0.623807  |
| 4             | 6             | 0           | -1.020429               | 0.524971  | 1.689702  |
| 5             | 6             | 0           | 1.772663                | -1.193329 | -0.271813 |
| 6             | 6             | 0           | -0.363142               | -2.206917 | -0.841404 |
| 7             | 6             | 0           | 1.035356                | -1.885750 | -1.372226 |
| 8             | 1             | 0           | -0.554326               | 1.506563  | 1.772101  |
| 9             | 1             | 0           | -0.883342               | -0.024172 | 2.628256  |
| 10            | 1             | 0           | -2.085155               | 0.641739  | 1.528351  |
| 11            | 6             | 0           | 3.151538                | -1.021739 | 0.031239  |
| 12            | 6             | 0           | 3.209727                | -0.206692 | 1.192516  |
| 13            | 7             | 0           | 1.925265                | 0.097020  | 1.572731  |
| 14            | 1             | 0           | 1.669157                | 0.729270  | 2.309521  |
| 15            | 1             | 0           | -1.024677               | -2.586776 | -1.617095 |
| 16            | 1             | 0           | -0.274054               | -2.976375 | -0.071291 |
| 17            | 1             | 0           | 1.000746                | -1.255105 | -2.266824 |
| 18            | 1             | 0           | 1.520380                | -2.821477 | -1.657716 |
| 19            | 6             | 0           | 4.335894                | -1.482400 | -0.560141 |
| 20            | 6             | 0           | 5.544672                | -1.124000 | 0.007287  |
| 21            | 6             | 0           | 5.589381                | -0.313184 | 1.166093  |
| 22            | 6             | 0           | 4.430820                | 0.146608  | 1.766263  |
| 23            | 1             | 0           | 4.333043                | -2.100381 | -1.447931 |
| 24            | 1             | 0           | 4.481201                | 0.767581  | 2.651239  |
| 25            | 1             | 0           | 6.539732                | -0.039580 | 1.600244  |

Imaginary frequency: -37.7539 cm<sup>-1</sup>

Electronic energy  $E = -1490.173142$  a.u.

Enthalpy  $H = -1490.144410$  a.u.

Entropy  $S = 184.511$  cal/mol/K

Gibbs free energy  $G = -1490.232077$  a.u.

Total free energy in solution  $E_{\text{sol}} = -1491.06641$  a.u.

|    |   |   |           |           |           |
|----|---|---|-----------|-----------|-----------|
| 26 | 8 | 0 | 6.661728  | -1.599416 | -0.614753 |
| 27 | 6 | 0 | 7.921710  | -1.236129 | -0.085759 |
| 28 | 1 | 0 | 8.059857  | -0.151757 | -0.097469 |
| 29 | 1 | 0 | 8.661220  | -1.700191 | -0.732944 |
| 30 | 1 | 0 | 8.048437  | -1.609868 | 0.933960  |
| 31 | 6 | 0 | -3.908699 | 1.121711  | -0.179267 |
| 32 | 6 | 0 | -4.712206 | -0.092950 | 0.134330  |
| 33 | 6 | 0 | -2.644117 | 0.858222  | -0.817462 |
| 34 | 6 | 0 | -2.233981 | -0.516765 | -1.109609 |
| 35 | 6 | 0 | -4.319670 | -1.345279 | -0.334123 |
| 36 | 8 | 0 | -3.217545 | -1.502866 | -1.137001 |
| 37 | 8 | 0 | -4.304055 | 2.238257  | 0.155085  |
| 38 | 6 | 0 | -1.668943 | 1.862363  | -0.851186 |
| 39 | 6 | 0 | -0.347423 | 1.675902  | -1.187172 |
| 40 | 1 | 0 | -1.729472 | -0.576174 | -2.075976 |
| 41 | 1 | 0 | -1.975316 | 2.820594  | -0.444661 |
| 42 | 6 | 0 | 0.709862  | 2.633414  | -0.915973 |
| 43 | 8 | 0 | 1.876555  | 2.484365  | -1.226364 |
| 44 | 1 | 0 | 0.000966  | 0.806314  | -1.725396 |
| 45 | 8 | 0 | 0.290132  | 3.712117  | -0.200703 |
| 46 | 6 | 0 | 1.311730  | 4.672800  | 0.061038  |
| 47 | 1 | 0 | 2.117474  | 4.226708  | 0.643298  |
| 48 | 1 | 0 | 1.726804  | 5.052489  | -0.871344 |
| 49 | 1 | 0 | 0.829976  | 5.471356  | 0.618473  |
| 50 | 6 | 0 | -5.873828 | 0.006598  | 0.901364  |
| 51 | 6 | 0 | -6.626635 | -1.120575 | 1.193242  |
| 52 | 6 | 0 | -6.219414 | -2.365734 | 0.708627  |
| 53 | 6 | 0 | -5.067051 | -2.485446 | -0.056984 |
| 54 | 1 | 0 | -6.156199 | 0.993380  | 1.244316  |
| 55 | 1 | 0 | -7.526923 | -1.037705 | 1.787830  |
| 56 | 1 | 0 | -6.803760 | -3.250198 | 0.929277  |
| 57 | 1 | 0 | -4.735873 | -3.438399 | -0.447360 |

### trans-endo-TSb

Standard orientation:

| Center Number | Atomic Number | Atomic Type | Coordinates (Angstroms) |           |           |
|---------------|---------------|-------------|-------------------------|-----------|-----------|
|               |               |             | X                       | Y         | Z         |
| 1             | 7             | 0           | 2.426605                | 0.603189  | 1.140375  |
| 2             | 6             | 0           | 1.476422                | -0.156706 | 1.689650  |
| 3             | 6             | 0           | 1.858235                | -1.004209 | 2.879490  |
| 4             | 6             | 0           | 2.012865                | 1.855144  | 0.468735  |
| 5             | 1             | 0           | 1.220104                | -1.884789 | 2.980605  |
| 6             | 1             | 0           | 1.776727                | -0.406518 | 3.791617  |
| 7             | 1             | 0           | 2.897342                | -1.326278 | 2.799342  |
| 8             | 6             | 0           | 0.085435                | 0.241400  | 1.500692  |
| 9             | 6             | 0           | 0.664743                | 1.883691  | -0.269252 |
| 10            | 6             | 0           | -0.338138               | 1.164574  | 0.576894  |
| 11            | 7             | 0           | -1.001376               | -0.296710 | 2.153085  |
| 12            | 6             | 0           | -2.147250               | 0.269223  | 1.637446  |
| 13            | 6             | 0           | -1.763252               | 1.194250  | 0.639078  |
| 14            | 1             | 0           | -0.969811               | -1.033089 | 2.834362  |
| 15            | 1             | 0           | 1.964992                | 2.584151  | 1.283354  |
| 16            | 1             | 0           | 2.818942                | 2.152346  | -0.196994 |
| 17            | 1             | 0           | 0.381265                | 2.931664  | -0.407215 |

Imaginary frequency: -508.0325 cm<sup>-1</sup>  
 Electronic energy  $E = -1490.159438$  a.u.  
 Enthalpy  $H = -1490.130823$  a.u.  
 Entropy  $S = 181.217$  cal/mol/K  
 Gibbs free energy  $G = -1490.216924$  a.u.  
 Total free energy in solution  $E_{\text{sol}} = -1491.04360$  a.u.

|    |   |   |           |           |           |
|----|---|---|-----------|-----------|-----------|
| 18 | 1 | 0 | 0.740766  | 1.442444  | -1.265306 |
| 19 | 6 | 0 | -3.491213 | 0.051660  | 1.955990  |
| 20 | 6 | 0 | -2.746905 | 1.917492  | -0.063540 |
| 21 | 6 | 0 | -4.073734 | 1.691791  | 0.253861  |
| 22 | 6 | 0 | -4.441106 | 0.765976  | 1.257556  |
| 23 | 8 | 0 | -5.128790 | 2.317507  | -0.348472 |
| 24 | 6 | 0 | -4.821671 | 3.260897  | -1.353396 |
| 25 | 1 | 0 | -2.452443 | 2.618650  | -0.831161 |
| 26 | 1 | 0 | -3.783456 | -0.656348 | 2.721771  |
| 27 | 1 | 0 | -5.496376 | 0.639262  | 1.458030  |
| 28 | 1 | 0 | -4.218557 | 4.080976  | -0.953229 |
| 29 | 1 | 0 | -5.773815 | 3.648800  | -1.706316 |
| 30 | 1 | 0 | -4.286614 | 2.792916  | -2.184513 |
| 31 | 6 | 0 | 0.466312  | -1.186950 | -1.906846 |
| 32 | 6 | 0 | -0.837276 | -1.720260 | -1.474178 |
| 33 | 6 | 0 | 1.560396  | -1.360988 | -0.925524 |
| 34 | 6 | 0 | 1.298384  | -2.038319 | 0.254656  |
| 35 | 6 | 0 | -0.959494 | -2.402091 | -0.262715 |
| 36 | 8 | 0 | 0.112580  | -2.641467 | 0.544399  |
| 37 | 8 | 0 | 0.620645  | -0.602093 | -2.968064 |
| 38 | 6 | 0 | 2.731937  | -0.605446 | -1.072181 |
| 39 | 6 | 0 | 3.535564  | -0.379078 | 0.055686  |
| 40 | 1 | 0 | 2.079407  | -2.439070 | 0.880003  |
| 41 | 1 | 0 | 2.838171  | 0.004628  | -1.958160 |
| 42 | 6 | 0 | 4.805786  | 0.406838  | -0.053107 |
| 43 | 8 | 0 | 5.744199  | 0.255919  | 0.689611  |
| 44 | 8 | 0 | 4.795230  | 1.295391  | -1.059603 |
| 45 | 6 | 0 | 6.006070  | 2.052199  | -1.194832 |
| 46 | 1 | 0 | 6.843422  | 1.382847  | -1.381714 |
| 47 | 1 | 0 | 5.842727  | 2.714485  | -2.039013 |
| 48 | 1 | 0 | 6.196170  | 2.617800  | -0.284776 |
| 49 | 1 | 0 | 3.700556  | -1.176933 | 0.769123  |
| 50 | 6 | 0 | -1.984073 | -1.506789 | -2.249144 |
| 51 | 6 | 0 | -3.215267 | -1.966924 | -1.823663 |
| 52 | 6 | 0 | -3.314093 | -2.656133 | -0.607749 |
| 53 | 6 | 0 | -2.194546 | -2.880622 | 0.173523  |
| 54 | 1 | 0 | -1.863164 | -0.966350 | -3.178682 |
| 55 | 1 | 0 | -4.100968 | -1.791813 | -2.419269 |
| 56 | 1 | 0 | -4.278118 | -3.012400 | -0.268147 |
| 57 | 1 | 0 | -2.249552 | -3.408514 | 1.116302  |

### trans-exo-TSb

Standard orientation:

| Center Number | Atomic Number | Atomic Type | Coordinates (Angstroms) |           |           |
|---------------|---------------|-------------|-------------------------|-----------|-----------|
|               |               |             | X                       | Y         | Z         |
| 7             | 0             | 1.322941    | -1.846650               | 0.534007  |           |
| 2             | 6             | 0           | 0.738861                | -0.687436 | 0.886311  |
| 3             | 6             | 0           | 1.504749                | 0.153306  | 1.871701  |
| 4             | 6             | 0           | 0.442626                | -2.943982 | 0.089240  |
| 5             | 1             | 0           | 1.170756                | 1.193036  | 1.880735  |
| 6             | 1             | 0           | 2.567997                | 0.121064  | 1.631192  |
| 7             | 1             | 0           | 1.382007                | -0.274952 | 2.870235  |
| 8             | 6             | 0           | -0.718055               | -0.616625 | 0.840002  |
| 9             | 6             | 0           | -0.837854               | -2.562596 | -0.672649 |
| 10            | 6             | 0           | -1.500262               | -1.456202 | 0.086965  |
| 11            | 7             | 0           | -1.496435               | 0.350436  | 1.426874  |
| 12            | 6             | 0           | -2.805516               | 0.146809  | 1.046759  |
| 13            | 6             | 0           | -2.844022               | -0.985985 | 0.199067  |
| 14            | 1             | 0           | -1.162789               | 1.108894  | 1.993856  |

Imaginary frequency: -525.4974 cm<sup>-1</sup>

Electronic energy  $E = -1490.153885$  a.u.

Enthalpy  $H = -1490.125166$  a.u.

Entropy  $S = 184.625$  cal/mol/K

Gibbs free energy  $G = -1490.212887$  a.u.

Total free energy in solution  $E_{\text{sol}} = -1491.03867$  a.u. 1

|    |   |   |           |           |           |
|----|---|---|-----------|-----------|-----------|
| 15 | 1 | 0 | 1.051466  | -3.647181 | -0.477256 |
| 16 | 1 | 0 | 0.142234  | -3.446972 | 1.013242  |
| 17 | 1 | 0 | -0.613565 | -2.266500 | -1.704601 |
| 18 | 1 | 0 | -1.475257 | -3.448079 | -0.739436 |
| 19 | 6 | 0 | -4.072824 | -1.419517 | -0.335724 |
| 20 | 6 | 0 | -5.214773 | -0.711132 | -0.007388 |
| 21 | 6 | 0 | -5.159200 | 0.416503  | 0.843982  |
| 22 | 6 | 0 | -3.965923 | 0.852255  | 1.379358  |
| 23 | 8 | 0 | -6.468031 | -1.015869 | -0.456355 |
| 24 | 6 | 0 | -6.590092 | -2.141343 | -1.300513 |
| 25 | 1 | 0 | -3.935069 | 1.714893  | 2.033316  |
| 26 | 1 | 0 | -6.089066 | 0.924262  | 1.060982  |
| 27 | 1 | 0 | -4.102678 | -2.282366 | -0.985550 |
| 28 | 1 | 0 | -6.257451 | -3.052157 | -0.794485 |
| 29 | 1 | 0 | -7.646490 | -2.225433 | -1.542386 |
| 30 | 1 | 0 | -6.014235 | -2.008940 | -2.220974 |
| 31 | 6 | 0 | 2.774889  | 2.134136  | -0.599206 |
| 32 | 6 | 0 | 1.712419  | 3.142910  | -0.426339 |
| 33 | 6 | 0 | 2.288171  | 0.764655  | -0.892540 |
| 34 | 6 | 0 | 0.912570  | 0.542416  | -0.985393 |
| 35 | 6 | 0 | 0.371040  | 2.796134  | -0.601319 |
| 36 | 8 | 0 | -0.011742 | 1.547102  | -0.971237 |
| 37 | 8 | 0 | 3.959309  | 2.399033  | -0.481518 |
| 38 | 6 | 0 | 3.166518  | -0.306736 | -0.758029 |
| 39 | 6 | 0 | 2.657482  | -1.618904 | -0.743539 |
| 40 | 1 | 0 | 0.501837  | -0.322064 | -1.479752 |
| 41 | 1 | 0 | 4.172584  | -0.097955 | -0.422451 |
| 42 | 6 | 0 | 3.568536  | -2.743954 | -0.373708 |
| 43 | 8 | 0 | 3.430965  | -3.880006 | -0.766593 |
| 44 | 8 | 0 | 4.526795  | -2.366305 | 0.477711  |
| 45 | 6 | 0 | 5.399802  | -3.422828 | 0.897594  |
| 46 | 1 | 0 | 5.896927  | -3.863415 | 0.035658  |
| 47 | 1 | 0 | 6.118745  | -2.958355 | 1.564894  |
| 48 | 1 | 0 | 4.829220  | -4.191943 | 1.414567  |
| 49 | 1 | 0 | 1.988953  | -1.911221 | -1.547774 |
| 50 | 6 | 0 | 2.029896  | 4.457635  | -0.059878 |
| 51 | 6 | 0 | 1.031707  | 5.394876  | 0.125207  |
| 52 | 6 | 0 | -0.309263 | 5.024756  | -0.052756 |
| 53 | 6 | 0 | -0.648098 | 3.732554  | -0.413311 |
| 54 | 1 | 0 | 3.076572  | 4.699913  | 0.069796  |
| 55 | 1 | 0 | 1.280210  | 6.409480  | 0.406325  |
| 56 | 1 | 0 | -1.093082 | 5.757315  | 0.092409  |
| 57 | 1 | 0 | -1.674052 | 3.420309  | -0.558134 |

**trans-endo-3a**

Standard orientation:

| Center Number | Atomic Number | Atomic Type | Coordinates (Angstroms) |           |          |
|---------------|---------------|-------------|-------------------------|-----------|----------|
|               |               |             | X                       | Y         | Z        |
| 1             | 6             | 0           | 0.900357                | 0.940092  | 0.640508 |
| 2             | 7             | 0           | 1.145304                | -1.280993 | 1.621801 |
| 3             | 6             | 0           | 1.883212                | -0.132302 | 1.056546 |
| 4             | 6             | 0           | 2.877262                | 0.405777  | 2.093637 |
| 5             | 6             | 0           | -0.415133               | 0.984823  | 1.021052 |
| 6             | 6             | 0           | 0.073934                | -0.874080 | 2.541352 |
| 7             | 6             | 0           | -1.045410               | -0.055300 | 1.889951 |
| 8             | 1             | 0           | 3.389080                | 1.286826  | 1.699077 |
| 9             | 1             | 0           | 3.611664                | -0.361261 | 2.342337 |
| 10            | 1             | 0           | 2.358627                | 0.712160  | 3.000285 |
| 11            | 6             | 0           | -0.977920               | 2.167637  | 0.437120 |

Imaginary frequency: none

Electronic energy  $E = -1490.211023$  a.u.

Enthalpy  $H = -1490.183062$  a.u.

Entropy  $S = 180.930$  cal/mol/K

Gibbs free energy  $G = -1490.269028$  a.u.

Total free energy in solution  $E_{\text{sol}} = -1491.10058$  a.u.

|    |   |   |           |           |           |
|----|---|---|-----------|-----------|-----------|
| 12 | 6 | 0 | 0.057883  | 2.792920  | -0.285505 |
| 13 | 7 | 0 | 1.204061  | 2.042979  | -0.126415 |
| 14 | 1 | 0 | 2.033244  | 2.120974  | -0.696072 |
| 15 | 1 | 0 | 0.546794  | -0.266644 | 3.314050  |
| 16 | 1 | 0 | -0.315116 | -1.764049 | 3.027552  |
| 17 | 1 | 0 | -1.655780 | 0.405675  | 2.673111  |
| 18 | 1 | 0 | -1.714671 | -0.699741 | 1.310570  |
| 19 | 6 | 0 | -2.262739 | 2.739172  | 0.468550  |
| 20 | 6 | 0 | -0.160283 | 3.976160  | -0.997935 |
| 21 | 6 | 0 | -2.470848 | 3.912328  | -0.236366 |
| 22 | 6 | 0 | -1.426347 | 4.522327  | -0.965819 |
| 23 | 1 | 0 | -3.054664 | 2.258930  | 1.026053  |
| 24 | 8 | 0 | -3.666328 | 4.574953  | -0.296283 |
| 25 | 1 | 0 | -1.655513 | 5.435592  | -1.498010 |
| 26 | 1 | 0 | 0.634545  | 4.452435  | -1.558077 |
| 27 | 6 | 0 | -4.746283 | 4.006453  | 0.411579  |
| 28 | 1 | 0 | -5.596083 | 4.665109  | 0.249586  |
| 29 | 1 | 0 | -4.529958 | 3.946352  | 1.482349  |
| 30 | 1 | 0 | -4.982615 | 3.006462  | 0.036258  |
| 31 | 6 | 0 | -0.445439 | -2.179824 | -1.685642 |
| 32 | 6 | 0 | -1.564109 | -2.870503 | -1.023902 |
| 33 | 6 | 0 | 0.684201  | -1.838265 | -0.790646 |
| 34 | 6 | 0 | 0.769874  | -2.333710 | 0.634389  |
| 35 | 6 | 0 | -1.475859 | -3.225670 | 0.325148  |
| 36 | 8 | 0 | -0.386984 | -3.006977 | 1.107602  |
| 37 | 8 | 0 | -0.448036 | -1.886917 | -2.867781 |
| 38 | 6 | 0 | 1.693882  | -1.073254 | -1.207833 |
| 39 | 6 | 0 | 2.695398  | -0.708060 | -0.160515 |
| 40 | 1 | 0 | 1.560850  | -3.089848 | 0.673359  |
| 41 | 1 | 0 | 1.724634  | -0.665167 | -2.210247 |
| 42 | 6 | 0 | 3.789340  | 0.208361  | -0.653162 |
| 43 | 8 | 0 | 3.633747  | 1.177013  | -1.366123 |
| 44 | 1 | 0 | 3.191621  | -1.600498 | 0.235465  |
| 45 | 8 | 0 | 4.986682  | -0.176435 | -0.209788 |
| 46 | 6 | 0 | 6.080856  | 0.667625  | -0.605483 |
| 47 | 1 | 0 | 6.156611  | 0.692685  | -1.690315 |
| 48 | 1 | 0 | 5.924418  | 1.677243  | -0.230742 |
| 49 | 1 | 0 | 6.964749  | 0.221108  | -0.162687 |
| 50 | 6 | 0 | -2.732077 | -3.160840 | -1.738801 |
| 51 | 6 | 0 | -3.797466 | -3.792433 | -1.125475 |
| 52 | 6 | 0 | -3.696267 | -4.142081 | 0.225953  |
| 53 | 6 | 0 | -2.548749 | -3.865595 | 0.950600  |
| 54 | 1 | 0 | -2.761537 | -2.867673 | -2.780231 |
| 55 | 1 | 0 | -4.699111 | -4.013278 | -1.680281 |
| 56 | 1 | 0 | -4.523986 | -4.637190 | 0.718021  |
| 57 | 1 | 0 | -2.453628 | -4.133753 | 1.994077  |

**trans-endo-4a**

Standard orientation:

| Center Number | Atomic Number | Atomic Type | Coordinates (Angstroms) |           |          |
|---------------|---------------|-------------|-------------------------|-----------|----------|
|               |               |             | X                       | Y         | Z        |
| 1             | 6             | 0           | -1.626839               | 0.317516  | 0.580852 |
| 2             | 7             | 0           | 0.608812                | -0.491769 | 0.855945 |
| 3             | 6             | 0           | -0.225294               | 0.745304  | 0.985729 |
| 4             | 6             | 0           | -0.193987               | 1.205439  | 2.455817 |
| 5             | 6             | 0           | -2.031958               | -0.962394 | 0.281574 |
| 6             | 6             | 0           | 0.009794                | -1.749810 | 1.309282 |
| 7             | 6             | 0           | -1.123999               | -2.146561 | 0.372275 |
| 8             | 1             | 0           | -0.781342               | 2.116250  | 2.557824 |

Imaginary frequency: none  
 Electronic energy  $E = -1490.224292$  a.u.  
 Enthalpy  $H = -1490.195125$  a.u.  
 Entropy  $S = 186.579$  cal/mol/K  
 Gibbs free energy  $G = -1490.283775$  a.u.  
 Total free energy in solution  $E_{\text{sol}} = -1491.10669$  a.u.

|    |   |   |           |           |           |
|----|---|---|-----------|-----------|-----------|
| 9  | 1 | 0 | 0.839167  | 1.411295  | 2.740518  |
| 10 | 1 | 0 | -0.612186 | 0.444807  | 3.116324  |
| 11 | 6 | 0 | -3.435858 | -0.904971 | 0.008463  |
| 12 | 6 | 0 | -3.821347 | 0.440775  | 0.172470  |
| 13 | 7 | 0 | -2.706824 | 1.159776  | 0.532921  |
| 14 | 1 | 0 | -2.632864 | 2.157908  | 0.663862  |
| 15 | 1 | 0 | -0.381602 | -1.614672 | 2.318949  |
| 16 | 1 | 0 | 0.800463  | -2.498356 | 1.345138  |
| 17 | 1 | 0 | -1.651684 | -3.011590 | 0.783333  |
| 18 | 1 | 0 | -0.717536 | -2.438389 | -0.601326 |
| 19 | 6 | 0 | -4.391241 | -1.875874 | -0.346971 |
| 20 | 6 | 0 | -5.145571 | 0.850302  | -0.019960 |
| 21 | 6 | 0 | -5.698767 | -1.463663 | -0.533258 |
| 22 | 6 | 0 | -6.070151 | -0.109530 | -0.371403 |
| 23 | 1 | 0 | -4.094838 | -2.907564 | -0.474245 |
| 24 | 8 | 0 | -6.727849 | -2.294507 | -0.881942 |
| 25 | 1 | 0 | -7.108731 | 0.145745  | -0.532910 |
| 26 | 1 | 0 | -5.439795 | 1.884693  | 0.104347  |
| 27 | 6 | 0 | -6.415221 | -3.659472 | -1.055463 |
| 28 | 1 | 0 | -7.346125 | -4.152374 | -1.324441 |
| 29 | 1 | 0 | -6.024412 | -4.096350 | -0.131782 |
| 30 | 1 | 0 | -5.683746 | -3.799141 | -1.856763 |
| 31 | 6 | 0 | 3.774120  | 0.527599  | -0.826243 |
| 32 | 6 | 0 | 4.670429  | -0.662290 | -0.586612 |
| 33 | 6 | 0 | 2.438932  | 0.574660  | -0.245647 |
| 34 | 6 | 0 | 1.838525  | -0.506448 | 0.351146  |
| 35 | 6 | 0 | 4.947744  | -1.220045 | 0.667361  |
| 36 | 8 | 0 | 4.331283  | -0.701507 | 1.771604  |
| 37 | 8 | 0 | 4.176761  | 1.414275  | -1.568108 |
| 38 | 6 | 0 | 1.628781  | 1.737089  | -0.418646 |
| 39 | 6 | 0 | 0.380865  | 1.842512  | 0.094572  |
| 40 | 1 | 0 | 2.053294  | 2.555171  | -0.983458 |
| 41 | 6 | 0 | -0.312237 | 3.132533  | -0.024899 |
| 42 | 8 | 0 | -1.296315 | 3.479693  | 0.615891  |
| 43 | 8 | 0 | 0.262095  | 3.967151  | -0.903744 |
| 44 | 6 | 0 | -0.339096 | 5.263172  | -0.991680 |
| 45 | 1 | 0 | -1.376161 | 5.176039  | -1.309728 |
| 46 | 1 | 0 | -0.301232 | 5.763828  | -0.026000 |
| 47 | 1 | 0 | 0.246992  | 5.801635  | -1.729785 |
| 48 | 6 | 0 | 5.348550  | -1.162729 | -1.700193 |
| 49 | 6 | 0 | 6.239726  | -2.222168 | -1.596364 |
| 50 | 6 | 0 | 6.488417  | -2.779203 | -0.345284 |
| 51 | 6 | 0 | 5.850988  | -2.277314 | 0.782003  |
| 52 | 1 | 0 | 5.161235  | -0.686574 | -2.653760 |
| 53 | 1 | 0 | 6.742845  | -2.600748 | -2.475773 |
| 54 | 1 | 0 | 7.185953  | -3.600417 | -0.240302 |
| 55 | 1 | 0 | 6.058289  | -2.697570 | 1.760755  |
| 56 | 1 | 0 | 4.724100  | -1.096244 | 2.560046  |
| 57 | 1 | 0 | 2.346377  | -1.460832 | 0.403961  |

**trans-endo-3a'**

Standard orientation:

| Center Number | Atomic Number | Atomic Type | Coordinates (Angstroms) |          |           |
|---------------|---------------|-------------|-------------------------|----------|-----------|
|               |               |             | X                       | Y        | Z         |
| 1             | 6             | 0           | 0.391011                | 2.008734 | 1.647890  |
| 2             | 6             | 0           | -0.632698               | 2.922057 | 1.105951  |
| 3             | 6             | 0           | 1.321437                | 1.453110 | 0.639946  |
| 4             | 6             | 0           | 1.231874                | 1.805846 | -0.817020 |
| 5             | 6             | 0           | -0.696540               | 3.187488 | -0.264948 |

Imaginary frequency: none  
 Electronic energy  $E = -1490.228986$  a.u.  
 Enthalpy  $H = -1490.201585$  a.u.  
 Entropy  $S = 175.189$  cal/mol/K  
 Gibbs free energy  $G = -1490.284823$  a.u.  
 Total free energy in solution  $E_{\text{sol}} = -1491.04360$  a.u.

|    |   |   |           |           |           |
|----|---|---|-----------|-----------|-----------|
| 6  | 8 | 0 | 0.131694  | 2.635845  | -1.193917 |
| 7  | 8 | 0 | 0.475847  | 1.737249  | 2.831295  |
| 8  | 6 | 0 | 2.261991  | 0.563126  | 0.960203  |
| 9  | 6 | 0 | 3.124027  | 0.097225  | -0.175868 |
| 10 | 1 | 0 | 2.133790  | 2.340868  | -1.137147 |
| 11 | 1 | 0 | 2.393588  | 0.198548  | 1.970892  |
| 12 | 6 | 0 | 4.099131  | -0.984269 | 0.261480  |
| 13 | 8 | 0 | 4.793493  | -1.632292 | -0.481566 |
| 14 | 8 | 0 | 4.075195  | -1.147962 | 1.588688  |
| 15 | 6 | 0 | 4.990368  | -2.136613 | 2.084369  |
| 16 | 1 | 0 | 6.011259  | -1.863734 | 1.822082  |
| 17 | 1 | 0 | 4.855413  | -2.144154 | 3.161039  |
| 18 | 1 | 0 | 4.757991  | -3.108897 | 1.654806  |
| 19 | 1 | 0 | 3.754646  | 0.938427  | -0.492601 |
| 20 | 6 | 0 | -1.558741 | 3.521617  | 1.965760  |
| 21 | 6 | 0 | -2.534034 | 4.371544  | 1.476046  |
| 22 | 6 | 0 | -2.586392 | 4.628935  | 0.102543  |
| 23 | 6 | 0 | -1.677773 | 4.045426  | -0.766856 |
| 24 | 1 | 0 | -1.479847 | 3.287746  | 3.019438  |
| 25 | 1 | 0 | -3.248642 | 4.831066  | 2.145220  |
| 26 | 1 | 0 | -3.343205 | 5.294332  | -0.293557 |
| 27 | 1 | 0 | -1.699345 | 4.243457  | -1.830538 |
| 28 | 7 | 0 | 2.352462  | -0.322162 | -1.373240 |
| 29 | 6 | 0 | 1.143221  | 0.491670  | -1.648659 |
| 30 | 6 | 0 | 1.113656  | 0.833713  | -3.142184 |
| 31 | 6 | 0 | 2.114599  | -1.766381 | -1.483621 |
| 32 | 1 | 0 | 0.225668  | 1.411937  | -3.397033 |
| 33 | 1 | 0 | 1.109595  | -0.084991 | -3.728883 |
| 34 | 1 | 0 | 2.004046  | 1.408542  | -3.401616 |
| 35 | 6 | 0 | -0.102319 | -0.250406 | -1.225270 |
| 36 | 6 | 0 | 1.092219  | -2.314300 | -0.484466 |
| 37 | 6 | 0 | -0.146089 | -1.495978 | -0.658695 |
| 38 | 7 | 0 | -1.382290 | 0.242030  | -1.358212 |
| 39 | 6 | 0 | -2.269196 | -0.682840 | -0.851341 |
| 40 | 6 | 0 | -1.525361 | -1.795422 | -0.406926 |
| 41 | 1 | 0 | -1.615617 | 1.163380  | -1.681090 |
| 42 | 1 | 0 | 1.745720  | -1.949754 | -2.495284 |
| 43 | 1 | 0 | 3.075468  | -2.275298 | -1.408240 |
| 44 | 1 | 0 | 0.897519  | -3.368991 | -0.701330 |
| 45 | 1 | 0 | 1.488012  | -2.262125 | 0.534970  |
| 46 | 6 | 0 | -3.662949 | -0.644066 | -0.746539 |
| 47 | 6 | 0 | -2.185770 | -2.907523 | 0.146926  |
| 48 | 6 | 0 | -3.565612 | -2.864348 | 0.245056  |
| 49 | 6 | 0 | -4.296097 | -1.738954 | -0.197407 |
| 50 | 8 | 0 | -4.334836 | -3.869222 | 0.763160  |
| 51 | 6 | 0 | -3.656987 | -5.017893 | 1.225368  |
| 52 | 1 | 0 | -1.614637 | -3.758457 | 0.490176  |
| 53 | 1 | 0 | -4.231448 | 0.214340  | -1.081861 |
| 54 | 1 | 0 | -5.371897 | -1.767469 | -0.088694 |
| 55 | 1 | 0 | -3.102085 | -5.501760 | 0.416188  |
| 56 | 1 | 0 | -4.423504 | -5.694449 | 1.594930  |
| 57 | 1 | 0 | -2.966709 | -4.769559 | 2.036582  |

**trans-exo-3a**

Standard orientation:

Center Atomic Atomic Coordinates (Angstroms)  
Number Number Type X Y Z

Imaginary frequency: none  
Electronic energy  $E = -1490.221375$  a.u.  
Enthalpy  $H = -1490.194224$  a.u.  
Entropy  $S = 176.409$  cal/mol/K  
Gibbs free energy  $G = -1490.278042$  a.u.

Total free energy in solution  $E_{\text{sol}} = -1491.03867$  a.u.

---

|    |   |   |           |           |           |
|----|---|---|-----------|-----------|-----------|
| 1  | 6 | 0 | 1.423999  | 0.624714  | 0.463926  |
| 2  | 7 | 0 | -0.817798 | 0.045494  | 1.241530  |
| 3  | 6 | 0 | 0.067676  | 1.168294  | 0.851459  |
| 4  | 6 | 0 | 0.155776  | 2.117383  | 2.058529  |
| 5  | 6 | 0 | 1.842070  | -0.673011 | 0.609320  |
| 6  | 6 | 0 | -0.109185 | -0.973208 | 2.036894  |
| 7  | 6 | 0 | 0.986760  | -1.711134 | 1.262534  |
| 8  | 1 | 0 | 0.888688  | 2.906424  | 1.882625  |
| 9  | 1 | 0 | 0.471063  | 1.570649  | 2.944856  |
| 10 | 1 | 0 | -0.825679 | 2.554221  | 2.246986  |
| 11 | 6 | 0 | 3.176483  | -0.738763 | 0.087764  |
| 12 | 6 | 0 | 3.502490  | 0.560137  | -0.356153 |
| 13 | 7 | 0 | 2.420763  | 1.377395  | -0.110355 |
| 14 | 1 | 0 | 2.316050  | 2.344332  | -0.383364 |
| 15 | 1 | 0 | -0.852932 | -1.658111 | 2.432235  |
| 16 | 1 | 0 | 0.345882  | -0.459985 | 2.883649  |
| 17 | 1 | 0 | 0.546382  | -2.400050 | 0.533684  |
| 18 | 1 | 0 | 1.570816  | -2.321318 | 1.957725  |
| 19 | 6 | 0 | 4.114635  | -1.780999 | -0.029767 |
| 20 | 6 | 0 | 5.344978  | -1.489782 | -0.592771 |
| 21 | 6 | 0 | 5.655543  | -0.185538 | -1.038076 |
| 22 | 6 | 0 | 4.747596  | 0.846137  | -0.925550 |
| 23 | 8 | 0 | 6.348889  | -2.401778 | -0.768974 |
| 24 | 6 | 0 | 6.095321  | -3.722118 | -0.340104 |
| 25 | 1 | 0 | 6.994968  | -4.291045 | -0.560953 |
| 26 | 1 | 0 | 5.247274  | -4.156501 | -0.877554 |
| 27 | 1 | 0 | 5.895733  | -3.757583 | 0.734944  |
| 28 | 1 | 0 | 3.863825  | -2.774714 | 0.313540  |
| 29 | 1 | 0 | 6.634366  | -0.025177 | -1.469669 |
| 30 | 1 | 0 | 4.996581  | 1.842976  | -1.266743 |
| 31 | 6 | 0 | -3.887188 | 0.212601  | -0.817955 |
| 32 | 6 | 0 | -4.304066 | -1.177930 | -0.573813 |
| 33 | 6 | 0 | -2.490643 | 0.522911  | -0.420344 |
| 34 | 6 | 0 | -1.586770 | -0.535427 | 0.147640  |
| 35 | 8 | 0 | -2.296462 | -1.640489 | 0.706788  |
| 36 | 8 | 0 | -4.617411 | 1.046716  | -1.323728 |
| 37 | 6 | 0 | -1.983413 | 1.735526  | -0.620288 |
| 38 | 6 | 0 | -0.521591 | 1.955780  | -0.394756 |
| 39 | 1 | 0 | -0.943973 | -0.951964 | -0.646545 |
| 40 | 1 | 0 | -2.605810 | 2.520630  | -1.029341 |
| 41 | 6 | 0 | -0.134449 | 3.420854  | -0.326277 |
| 42 | 8 | 0 | 0.979487  | 3.842837  | -0.559789 |
| 43 | 1 | 0 | 0.002354  | 1.569719  | -1.276075 |
| 44 | 8 | 0 | -1.140960 | 4.209949  | 0.040573  |
| 45 | 6 | 0 | -0.809293 | 5.602761  | 0.170326  |
| 46 | 1 | 0 | -0.037528 | 5.727414  | 0.927208  |
| 47 | 1 | 0 | -0.450214 | 5.989173  | -0.780668 |
| 48 | 1 | 0 | -1.730793 | 6.091208  | 0.468411  |
| 49 | 6 | 0 | -3.480680 | -2.029928 | 0.167987  |
| 50 | 6 | 0 | -5.535863 | -1.643204 | -1.046258 |
| 51 | 6 | 0 | -5.942993 | -2.939476 | -0.789071 |
| 52 | 6 | 0 | -5.111290 | -3.781445 | -0.042235 |
| 53 | 6 | 0 | -3.888503 | -3.337536 | 0.435673  |
| 54 | 1 | 0 | -3.236046 | -3.975874 | 1.015799  |
| 55 | 1 | 0 | -5.421997 | -4.797462 | 0.166702  |
| 56 | 1 | 0 | -6.894073 | -3.299624 | -1.157168 |
| 57 | 1 | 0 | -6.148434 | -0.951035 | -1.609275 |

---

**trans-exo-4a**

Standard orientation:

Imaginary frequency: none

Electronic energy  $E = -1490.228790$  a.u.



| Center Number | Atomic Number | Atomic Type | Coordinates (Angstroms) |           |           |
|---------------|---------------|-------------|-------------------------|-----------|-----------|
|               |               |             | X                       | Y         | Z         |
| 1             | 6             | 0           | 1.614195                | 0.305930  | 0.578880  |
| 2             | 7             | 0           | -0.618848               | -0.524400 | 0.814113  |
| 3             | 6             | 0           | 0.205146                | 0.717441  | 0.974021  |
| 4             | 6             | 0           | 0.150770                | 1.154049  | 2.450093  |
| 5             | 6             | 0           | 2.030016                | -0.965906 | 0.260495  |
| 6             | 6             | 0           | -0.015821               | -1.788650 | 1.251217  |
| 7             | 6             | 0           | 1.129646                | -2.157775 | 0.318428  |
| 8             | 1             | 0           | 0.731426                | 2.066328  | 2.573936  |
| 9             | 1             | 0           | 0.563451                | 0.385364  | 3.104198  |
| 10            | 1             | 0           | -0.886184               | 1.352068  | 2.728038  |
| 11            | 6             | 0           | 3.437048                | -0.896415 | 0.007433  |
| 12            | 6             | 0           | 3.813462                | 0.447358  | 0.201521  |
| 13            | 7             | 0           | 2.690858                | 1.154404  | 0.561222  |
| 14            | 1             | 0           | 2.614475                | 2.148975  | 0.711962  |
| 15            | 1             | 0           | -0.802329               | -2.541937 | 1.265946  |
| 16            | 1             | 0           | 0.362581                | -1.667205 | 2.267252  |
| 17            | 1             | 0           | 0.735984                | -2.434210 | -0.664773 |
| 18            | 1             | 0           | 1.659166                | -3.026381 | 0.718835  |
| 19            | 6             | 0           | 4.401271                | -1.856835 | -0.352681 |
| 20            | 6             | 0           | 5.708947                | -1.435244 | -0.514312 |
| 21            | 6             | 0           | 6.071152                | -0.081910 | -0.323750 |
| 22            | 6             | 0           | 5.138070                | 0.867104  | 0.033205  |
| 23            | 8             | 0           | 6.746354                | -2.253883 | -0.863657 |
| 24            | 6             | 0           | 6.445430                | -3.619124 | -1.057966 |
| 25            | 1             | 0           | 7.383265                | -4.102178 | -1.320257 |
| 26            | 1             | 0           | 5.725911                | -3.753635 | -1.870844 |
| 27            | 1             | 0           | 6.045402                | -4.069320 | -0.144756 |
| 28            | 1             | 0           | 4.111616                | -2.887390 | -0.502202 |
| 29            | 1             | 0           | 7.110446                | 0.180962  | -0.467265 |
| 30            | 1             | 0           | 5.425778                | 1.900348  | 0.180059  |
| 31            | 6             | 0           | -3.767641               | 0.484460  | -0.914648 |
| 32            | 6             | 0           | -4.685690               | -0.663256 | -0.602455 |
| 33            | 6             | 0           | -2.460383               | 0.561368  | -0.254519 |
| 34            | 6             | 0           | -1.844703               | -0.537133 | 0.306816  |
| 35            | 8             | 0           | -4.357556               | -0.628321 | 1.813192  |
| 36            | 8             | 0           | -4.106455               | 1.325273  | -1.735655 |
| 37            | 6             | 0           | -1.644079               | 1.725691  | -0.424210 |
| 38            | 6             | 0           | -0.399388               | 1.822932  | 0.091929  |
| 39            | 1             | 0           | -2.063490               | 2.543905  | -0.992800 |
| 40            | 6             | 0           | 0.296399                | 3.116870  | -0.015391 |
| 41            | 8             | 0           | 1.260957                | 3.464644  | 0.651324  |
| 42            | 8             | 0           | -0.258756               | 3.944649  | -0.909592 |
| 43            | 6             | 0           | 0.338421                | 5.244706  | -0.987185 |
| 44            | 1             | 0           | 0.275508                | 5.746449  | -0.023566 |
| 45            | 1             | 0           | 1.382643                | 5.160334  | -1.281160 |
| 46            | 1             | 0           | -0.233135               | 5.777870  | -1.740083 |
| 47            | 6             | 0           | -4.932087               | -1.146806 | 0.691245  |
| 48            | 6             | 0           | -5.389616               | -1.221429 | -1.675206 |
| 49            | 6             | 0           | -6.269000               | -2.275697 | -1.489771 |
| 50            | 6             | 0           | -6.477695               | -2.767413 | -0.200252 |
| 51            | 6             | 0           | -5.823296               | -2.203625 | 0.883959  |
| 52            | 1             | 0           | -5.995334               | -2.548180 | 1.894896  |
| 53            | 1             | 0           | -7.166206               | -3.586973 | -0.036772 |
| 54            | 1             | 0           | -6.792328               | -2.705845 | -2.333053 |
| 55            | 1             | 0           | -5.219907               | -0.799736 | -2.657544 |
| 56            | 1             | 0           | -3.828263               | 0.146180  | 1.570705  |
| 57            | 1             | 0           | -2.344329               | -1.498857 | 0.325621  |

Enthalpy  $H = -1490.19975$  a.u.  
Entropy  $S = 186.826$  cal/mol/K  
Gibbs free energy  $G = -1490.288518$  a.u.  
Total free energy in solution  $E_{\text{sol}} = -1491.12235$  a.u.

**trans-exo-3a'**

Standard orientation:

Imaginary frequency: none

Electronic energy  $E = -1490.213372$  a.u.Enthalpy  $H = -1490.185297$  a.u.Entropy  $S = 179.937$  cal/mol/KGibbs free energy  $G = -1490.270790$  a.u.Total free energy in solution  $E_{\text{sol}} = -1491.03867$  a.u.

| Center<br>Number | Atomic<br>Number | Atomic<br>Type | Coordinates (Angstroms) |           |           |
|------------------|------------------|----------------|-------------------------|-----------|-----------|
|                  |                  |                | X                       | Y         | Z         |
| 1                | 6                | 0              | 3.550117                | 1.128993  | -0.865254 |
| 2                | 6                | 0              | 3.118016                | 2.486042  | -0.466534 |
| 3                | 6                | 0              | 2.520755                | 0.069270  | -0.682745 |
| 4                | 6                | 0              | 1.118621                | 0.492825  | -0.346230 |
| 5                | 6                | 0              | 1.918989                | 2.664176  | 0.232135  |
| 6                | 8                | 0              | 1.101989                | 1.619740  | 0.549428  |
| 7                | 8                | 0              | 4.662109                | 0.896424  | -1.302276 |
| 8                | 6                | 0              | 2.836711                | -1.209786 | -0.875747 |
| 9                | 6                | 0              | 1.821233                | -2.309023 | -0.764729 |
| 10               | 1                | 0              | 0.583785                | 0.785031  | -1.255501 |
| 11               | 1                | 0              | 3.853481                | -1.486736 | -1.123395 |
| 12               | 6                | 0              | 2.408224                | -3.364111 | 0.195771  |
| 13               | 8                | 0              | 1.705425                | -4.060589 | 0.886075  |
| 14               | 8                | 0              | 3.742548                | -3.399690 | 0.223143  |
| 15               | 6                | 0              | 4.293634                | -4.371685 | 1.127538  |
| 16               | 1                | 0              | 3.956319                | -5.368173 | 0.850380  |
| 17               | 1                | 0              | 5.370540                | -4.282875 | 1.027443  |
| 18               | 1                | 0              | 3.975824                | -4.154814 | 2.145142  |
| 19               | 1                | 0              | 1.827876                | -2.835870 | -1.729467 |
| 20               | 6                | 0              | 3.934744                | 3.590487  | -0.725553 |
| 21               | 6                | 0              | 3.563869                | 4.854768  | -0.301082 |
| 22               | 6                | 0              | 2.367049                | 5.016908  | 0.403133  |
| 23               | 6                | 0              | 1.544884                | 3.932416  | 0.672441  |
| 24               | 1                | 0              | 4.860606                | 3.414570  | -1.257556 |
| 25               | 1                | 0              | 4.194585                | 5.708991  | -0.506665 |
| 26               | 1                | 0              | 2.070350                | 6.001454  | 0.742025  |
| 27               | 1                | 0              | 0.615067                | 4.047588  | 1.213356  |
| 28               | 7                | 0              | 0.485206                | -1.807215 | -0.557402 |
| 29               | 6                | 0              | 0.332323                | -0.648464 | 0.331584  |
| 30               | 6                | 0              | 0.821467                | -0.873167 | 1.772017  |
| 31               | 6                | 0              | -0.574757               | -2.815604 | -0.511356 |
| 32               | 1                | 0              | 0.621692                | 0.007406  | 2.381395  |
| 33               | 1                | 0              | 1.895002                | -1.066547 | 1.797055  |
| 34               | 1                | 0              | 0.298207                | -1.725433 | 2.202651  |
| 35               | 6                | 0              | -1.126651               | -0.283958 | 0.324646  |
| 36               | 6                | 0              | -1.885958               | -2.236010 | -1.036965 |
| 37               | 6                | 0              | -2.136923               | -0.960161 | -0.299769 |
| 38               | 7                | 0              | -1.625226               | 0.830335  | 0.958485  |
| 39               | 6                | 0              | -2.981646               | 0.901067  | 0.719787  |
| 40               | 6                | 0              | -3.342118               | -0.218734 | -0.059634 |
| 41               | 1                | 0              | -1.046411               | 1.558888  | 1.338522  |
| 42               | 1                | 0              | -0.248557               | -3.654195 | -1.130610 |
| 43               | 1                | 0              | -0.729984               | -3.198127 | 0.502759  |
| 44               | 1                | 0              | -1.813279               | -2.064560 | -2.115053 |
| 45               | 1                | 0              | -2.693520               | -2.954351 | -0.869294 |
| 46               | 6                | 0              | -4.683595               | -0.412533 | -0.435827 |
| 47               | 6                | 0              | -5.617224               | 0.525851  | -0.030412 |
| 48               | 6                | 0              | -5.239983               | 1.646042  | 0.742650  |
| 49               | 6                | 0              | -3.929966               | 1.844592  | 1.125667  |
| 50               | 8                | 0              | -6.950580               | 0.466690  | -0.327404 |
| 51               | 6                | 0              | -7.386275               | -0.634994 | -1.094531 |
| 52               | 1                | 0              | -3.653075               | 2.704274  | 1.722975  |
| 53               | 1                | 0              | -6.017720               | 2.342284  | 1.026138  |
| 54               | 1                | 0              | -4.958603               | -1.271814 | -1.031078 |
| 55               | 1                | 0              | -7.182279               | -1.579280 | -0.581698 |

56 1 0 -8.459512 -0.513480 -1.217742  
 57 1 0 -6.905419 -0.647918 -2.077101

## 5.2 ZnCl<sub>2</sub>-catalyzed reaction

### 5.2.1 cis-2a as diene

#### ZnCl<sub>2</sub>

Standard orientation:

| Center Number | Atomic Number | Atomic Type | Coordinates (Angstroms) |          |           |
|---------------|---------------|-------------|-------------------------|----------|-----------|
|               |               |             | X                       | Y        | Z         |
| 30            | 0             | 0.000000    | 0.000000                | 0.000012 |           |
| 2             | 17            | 0           | 0.000000                | 0.000000 | -2.090318 |
| 3             | 17            | 0           | 0.000000                | 0.000000 | 2.090296  |

Imaginary frequency: none  
 Electronic energy  $E = -2699.445954$  a.u.  
 Enthalpy  $H = -2699.440847$  a.u.  
 Entropy  $S = 58.864$  cal/mol/K  
 Gibbs free energy  $G = -2699.468815$  a.u.  
 Total free energy in solution  $E_{sol} = -2699.76669$  a.u. 1

#### COM-I

Standard orientation:

| Center Number | Atomic Number | Atomic Type | Coordinates (Angstroms) |           |           |
|---------------|---------------|-------------|-------------------------|-----------|-----------|
|               |               |             | X                       | Y         | Z         |
| 6             | 0             | 1.696940    | -0.689024               | -0.745523 |           |
| 2             | 7             | 0           | 3.550569                | 0.610056  | -1.476213 |
| 3             | 6             | 0           | 3.133981                | -0.375865 | -0.784574 |
| 4             | 6             | 0           | 4.075667                | -1.204863 | 0.038386  |
| 5             | 6             | 0           | 0.741724                | 0.254306  | -1.073836 |
| 6             | 6             | 0           | 2.574138                | 1.332452  | -2.301150 |
| 7             | 6             | 0           | 1.195187                | 1.563370  | -1.663326 |
| 8             | 1             | 0           | 3.774540                | -1.187940 | 1.089072  |
| 9             | 1             | 0           | 5.081523                | -0.805037 | -0.064889 |
| 10            | 1             | 0           | 4.071943                | -2.245441 | -0.300410 |
| 11            | 6             | 0           | -0.541821               | -0.391572 | -0.882294 |
| 12            | 6             | 0           | -0.262303               | -1.709863 | -0.444708 |
| 13            | 7             | 0           | 1.103573                | -1.868221 | -0.407389 |
| 14            | 1             | 0           | 1.570545                | -2.619258 | 0.074958  |
| 15            | 1             | 0           | 2.451708                | 0.755535  | -3.225008 |
| 16            | 1             | 0           | 3.018898                | 2.288342  | -2.572775 |
| 17            | 1             | 0           | 0.493543                | 1.905681  | -2.426077 |
| 18            | 1             | 0           | 1.244387                | 2.350744  | -0.906959 |
| 19            | 6             | 0           | -1.880912               | 0.048616  | -1.013278 |
| 20            | 6             | 0           | -2.885595               | -0.842984 | -0.687714 |
| 21            | 6             | 0           | -2.585625               | -2.162092 | -0.254527 |
| 22            | 6             | 0           | -1.292176               | -2.607372 | -0.128569 |
| 23            | 8             | 0           | -4.206752               | -0.554730 | -0.736089 |
| 24            | 6             | 0           | -4.563109               | 0.790335  | -1.019645 |
| 25            | 1             | 0           | -2.081928               | 1.064016  | -1.320176 |

Imaginary frequency: none  
 Electronic energy  $E = -3387.696737$  a.u.  
 Enthalpy  $H = -3387.676466$  a.u.  
 Entropy  $S = 146.107$  cal/mol/K  
 Gibbs free energy  $G = -3387.745886$  a.u.  
 Total free energy in solution  $E_{sol} = -3388.43909$  a.u. 1

|    |    |   |           |           |           |
|----|----|---|-----------|-----------|-----------|
| 26 | 1  | 0 | -3.421392 | -2.802271 | -0.007491 |
| 27 | 1  | 0 | -1.078140 | -3.608747 | 0.219887  |
| 28 | 1  | 0 | -4.261324 | 1.067737  | -2.032635 |
| 29 | 1  | 0 | -5.645046 | 0.835637  | -0.937060 |
| 30 | 1  | 0 | -4.104728 | 1.471292  | -0.298458 |
| 31 | 30 | 0 | 0.051204  | 0.618550  | 1.125308  |
| 32 | 17 | 0 | 0.911216  | -0.725715 | 2.603763  |
| 33 | 17 | 0 | -0.794288 | 2.618981  | 1.148428  |

**cis-endo-TS-I**

Standard orientation:

| Center Number | Atomic Number | Atomic Type | Coordinates (Angstroms) |           |           |
|---------------|---------------|-------------|-------------------------|-----------|-----------|
|               |               |             | X                       | Y         | Z         |
| 1             | 6             | 0           | 0.668036                | 0.720044  | -0.813622 |
| 2             | 7             | 0           | -1.624432               | 0.238883  | -1.216954 |
| 3             | 6             | 0           | -0.596054               | 1.007892  | -1.472976 |
| 4             | 6             | 0           | -0.600750               | 1.968380  | -2.628769 |
| 5             | 6             | 0           | 0.814515                | -0.238262 | 0.180261  |
| 6             | 6             | 0           | -1.420816               | -0.994891 | -0.428830 |
| 7             | 6             | 0           | -0.411039               | -0.913802 | 0.721729  |
| 8             | 1             | 0           | -0.075351               | 2.893305  | -2.390475 |
| 9             | 1             | 0           | -1.611144               | 2.198322  | -2.960767 |
| 10            | 1             | 0           | -0.090520               | 1.472919  | -3.461746 |
| 11            | 6             | 0           | 2.189007                | -0.151637 | 0.619464  |
| 12            | 6             | 0           | 2.796357                | 0.861103  | -0.162434 |
| 13            | 7             | 0           | 1.837493                | 1.396807  | -0.988607 |
| 14            | 1             | 0           | 2.034618                | 2.007724  | -1.764359 |
| 15            | 1             | 0           | -1.068892               | -1.742423 | -1.149037 |
| 16            | 1             | 0           | -2.392762               | -1.325795 | -0.073684 |
| 17            | 1             | 0           | -0.195342               | -1.929006 | 1.057455  |
| 18            | 1             | 0           | -0.807606               | -0.350563 | 1.570454  |
| 19            | 6             | 0           | 2.949468                | -0.884011 | 1.560540  |
| 20            | 6             | 0           | 4.292449                | -0.577620 | 1.675745  |
| 21            | 6             | 0           | 4.884359                | 0.442575  | 0.883371  |
| 22            | 6             | 0           | 4.159097                | 1.163349  | -0.034351 |
| 23            | 8             | 0           | 5.149415                | -1.201170 | 2.515145  |
| 24            | 6             | 0           | 4.639201                | -2.294669 | 3.264181  |
| 25            | 1             | 0           | 2.478509                | -1.665409 | 2.137819  |
| 26            | 1             | 0           | 5.942002                | 0.621063  | 1.020767  |
| 27            | 1             | 0           | 4.627990                | 1.923416  | -0.644975 |
| 28            | 1             | 0           | 4.245425                | -3.067548 | 2.599719  |
| 29            | 1             | 0           | 5.479875                | -2.685923 | 3.829445  |
| 30            | 1             | 0           | 3.856960                | -1.963484 | 3.951248  |
| 31            | 30            | 0           | 1.969858                | -1.697266 | -1.147879 |
| 32            | 17            | 0           | 1.577094                | -3.668713 | -0.319236 |
| 33            | 17            | 0           | 2.610563                | -0.943582 | -3.088157 |
| 34            | 6             | 0           | -3.613667               | 0.423240  | 1.554100  |
| 35            | 6             | 0           | -4.637962               | -0.480195 | 0.976400  |
| 36            | 6             | 0           | -2.972175               | 1.310729  | 0.596293  |
| 37            | 6             | 0           | -3.142070               | 1.084766  | -0.807200 |
| 38            | 6             | 0           | -4.864569               | -0.495190 | -0.398297 |
| 39            | 8             | 0           | -4.164498               | 0.309483  | -1.267125 |
| 40            | 8             | 0           | -3.347288               | 0.410750  | 2.751270  |
| 41            | 6             | 0           | -1.929075               | 2.149118  | 1.039501  |
| 42            | 6             | 0           | -1.184122               | 2.965498  | 0.237519  |
| 43            | 1             | 0           | -3.012950               | 1.920438  | -1.480379 |
| 44            | 1             | 0           | -1.631445               | 2.037676  | 2.077951  |
| 45            | 6             | 0           | 0.067178                | 3.533546  | 0.735931  |
| 46            | 8             | 0           | 0.557425                | 3.354457  | 1.828527  |

Imaginary frequency: -345.1806 cm<sup>-1</sup>  
 Electronic energy  $E = -4189.677372$  a.u.  
 Enthalpy  $H = -4189.643037$  a.u.  
 Entropy  $S = 213.128$  cal/mol/K  
 Gibbs free energy  $G = -4189.744300$  a.u.  
 Total free energy in solution  $E_{\text{sol}} = -4190.86086$  a.u.

|    |   |   |           |           |           |
|----|---|---|-----------|-----------|-----------|
| 47 | 1 | 0 | -1.515038 | 3.292728  | -0.736050 |
| 48 | 8 | 0 | 0.687790  | 4.266806  | -0.228187 |
| 49 | 6 | 0 | 1.951115  | 4.803116  | 0.175649  |
| 50 | 1 | 0 | 1.826729  | 5.456898  | 1.036793  |
| 51 | 1 | 0 | 2.634762  | 3.997619  | 0.445178  |
| 52 | 1 | 0 | 2.322516  | 5.362058  | -0.679013 |
| 53 | 6 | 0 | -5.387049 | -1.330113 | 1.793959  |
| 54 | 6 | 0 | -6.347349 | -2.164594 | 1.246370  |
| 55 | 6 | 0 | -6.562563 | -2.157983 | -0.135157 |
| 56 | 6 | 0 | -5.823668 | -1.327190 | -0.965453 |
| 57 | 1 | 0 | -5.186472 | -1.302033 | 2.856906  |
| 58 | 1 | 0 | -6.928249 | -2.819141 | 1.882215  |
| 59 | 1 | 0 | -7.311322 | -2.808696 | -0.568274 |
| 60 | 1 | 0 | -5.969484 | -1.308778 | -2.036798 |

**cis-exo-TS-I**

Standard orientation:

| Center Number | Atomic Number | Atomic Type | Coordinates (Angstroms) |           |           |
|---------------|---------------|-------------|-------------------------|-----------|-----------|
|               |               |             | X                       | Y         | Z         |
| 1             | 6             | 0           | 0.494920                | 0.367693  | 0.425712  |
| 2             | 7             | 0           | -1.555759               | -0.563056 | -0.363485 |
| 3             | 6             | 0           | -0.956688               | 0.262063  | 0.476182  |
| 4             | 6             | 0           | -1.663137               | 0.737558  | 1.709279  |
| 5             | 6             | 0           | 1.270201                | -0.168150 | -0.593162 |
| 6             | 6             | 0           | -0.724108               | -1.406105 | -1.243353 |
| 7             | 6             | 0           | 0.566536                | -0.768592 | -1.774464 |
| 8             | 1             | 0           | -1.397364               | 1.765346  | 1.961051  |
| 9             | 1             | 0           | -1.358597               | 0.067029  | 2.521353  |
| 10            | 1             | 0           | -2.740779               | 0.653410  | 1.602522  |
| 11            | 6             | 0           | 2.627152                | 0.255166  | -0.328173 |
| 12            | 6             | 0           | 2.583627                | 1.002796  | 0.874301  |
| 13            | 7             | 0           | 1.273640                | 1.083597  | 1.281153  |
| 14            | 1             | 0           | 0.970240                | 1.442704  | 2.172201  |
| 15            | 1             | 0           | -1.361690               | -1.756763 | -2.053869 |
| 16            | 1             | 0           | -0.453518               | -2.287766 | -0.652553 |
| 17            | 1             | 0           | 0.365088                | 0.008954  | -2.518503 |
| 18            | 1             | 0           | 1.163447                | -1.543781 | -2.255637 |
| 19            | 6             | 0           | 3.863788                | -0.001277 | -0.965853 |
| 20            | 6             | 0           | 5.008169                | 0.501131  | -0.373070 |
| 21            | 6             | 0           | 4.943010                | 1.255924  | 0.828649  |
| 22            | 6             | 0           | 3.750267                | 1.509335  | 1.462543  |
| 23            | 1             | 0           | 3.889024                | -0.594321 | -1.867708 |
| 24            | 1             | 0           | 3.717136                | 2.065171  | 2.390008  |
| 25            | 1             | 0           | 5.878517                | 1.608619  | 1.240770  |
| 26            | 8             | 0           | 6.258499                | 0.320693  | -0.855178 |
| 27            | 6             | 0           | 6.400539                | -0.536078 | -1.978925 |
| 28            | 1             | 0           | 5.991928                | -1.526326 | -1.763461 |
| 29            | 1             | 0           | 5.903575                | -0.113818 | -2.855673 |
| 30            | 1             | 0           | 7.467911                | -0.608476 | -2.164950 |
| 31            | 30            | 0           | 2.220611                | -1.842945 | 0.644593  |
| 32            | 17            | 0           | 2.692500                | -3.400264 | -0.802080 |
| 33            | 17            | 0           | 1.903429                | -1.757660 | 2.790385  |
| 34            | 6             | 0           | -4.719600               | 1.267901  | -0.061927 |
| 35            | 6             | 0           | -5.376446               | -0.061577 | -0.029470 |
| 36            | 6             | 0           | -3.430886               | 1.285938  | -0.743562 |
| 37            | 6             | 0           | -2.909735               | 0.079763  | -1.315606 |
| 38            | 6             | 0           | -4.842654               | -1.132953 | -0.743002 |
| 39            | 8             | 0           | -3.727486               | -0.990317 | -1.533877 |

Imaginary frequency: -378.6187 cm<sup>-1</sup>  
 Electronic energy  $E = -4189.673193$  a.u.  
 Enthalpy  $H = -4189.638959$  a.u.  
 Entropy  $S = 212.491$  cal/mol/K  
 Gibbs free energy  $G = -4189.739920$  a.u.  
 Total free energy in solution  $E_{\text{sol}} = -4190.85671$  a.u.

|    |   |   |           |           |           |
|----|---|---|-----------|-----------|-----------|
| 40 | 8 | 0 | -5.210663 | 2.245236  | 0.487537  |
| 41 | 6 | 0 | -2.551006 | 2.347841  | -0.514468 |
| 42 | 6 | 0 | -1.221832 | 2.334258  | -0.876608 |
| 43 | 1 | 0 | -2.287748 | 0.214856  | -2.196026 |
| 44 | 1 | 0 | -2.906358 | 3.141512  | 0.135454  |
| 45 | 6 | 0 | -0.283479 | 3.296332  | -0.308302 |
| 46 | 8 | 0 | -0.478928 | 3.983842  | 0.675472  |
| 47 | 1 | 0 | -0.845494 | 1.724342  | -1.685038 |
| 48 | 8 | 0 | 0.899123  | 3.271324  | -0.961374 |
| 49 | 6 | 0 | 1.898296  | 4.143471  | -0.426989 |
| 50 | 1 | 0 | 1.606375  | 5.182584  | -0.572456 |
| 51 | 1 | 0 | 2.032800  | 3.959274  | 0.637282  |
| 52 | 1 | 0 | 2.809533  | 3.916624  | -0.972794 |
| 53 | 6 | 0 | -6.540602 | -0.261075 | 0.717376  |
| 54 | 6 | 0 | -7.151206 | -1.503503 | 0.746835  |
| 55 | 6 | 0 | -6.600596 | -2.563049 | 0.018964  |
| 56 | 6 | 0 | -5.447007 | -2.385368 | -0.730753 |
| 57 | 1 | 0 | -6.936635 | 0.588070  | 1.258853  |
| 58 | 1 | 0 | -8.051379 | -1.655652 | 1.327243  |
| 59 | 1 | 0 | -7.075119 | -3.535740 | 0.038594  |
| 60 | 1 | 0 | -5.004694 | -3.189465 | -1.302900 |

## COM-II

Standard orientation:

Imaginary frequency: none

Electronic energy  $E = -3387.715512$  a.u.

Enthalpy  $H = -3387.695121$  a.u.

Entropy  $S = 151.649$  cal/mol/K

Gibbs free energy  $G = -3387.767174$  a.u.

Total free energy in solution  $E_{\text{sol}} = -3388.20813$  a.u.

| Center Number | Atomic Number | Atomic Type | Coordinates (Angstroms) |           |           |
|---------------|---------------|-------------|-------------------------|-----------|-----------|
|               |               |             | X                       | Y         | Z         |
| 1             | 6             | 0           | 0.632023                | 0.840654  | -0.321293 |
| 2             | 7             | 0           | -1.523571               | -0.110000 | -0.105344 |
| 3             | 6             | 0           | -0.804018               | 0.958087  | -0.234179 |
| 4             | 6             | 0           | -1.423780               | 2.320220  | -0.285470 |
| 5             | 6             | 0           | 1.303138                | -0.302238 | 0.051516  |
| 6             | 6             | 0           | -0.848132               | -1.422633 | -0.211638 |
| 7             | 6             | 0           | 0.504770                | -1.485385 | 0.494277  |
| 8             | 1             | 0           | -0.950982               | 2.976770  | 0.447127  |
| 9             | 1             | 0           | -2.490668               | 2.280129  | -0.078417 |
| 10            | 1             | 0           | -1.268096               | 2.749706  | -1.279577 |
| 11            | 6             | 0           | 2.693814                | -0.004328 | 0.001560  |
| 12            | 6             | 0           | 2.800703                | 1.340746  | -0.423923 |
| 13            | 7             | 0           | 1.535421                | 1.846430  | -0.591419 |
| 14            | 1             | 0           | 1.315990                | 2.757430  | -0.953384 |
| 15            | 1             | 0           | -0.711756               | -1.619303 | -1.279860 |
| 16            | 1             | 0           | -1.531602               | -2.177363 | 0.170236  |
| 17            | 1             | 0           | 0.989786                | -2.426986 | 0.231401  |
| 18            | 1             | 0           | 0.380568                | -1.474764 | 1.582795  |
| 19            | 6             | 0           | 3.854850                | -0.760748 | 0.270309  |
| 20            | 6             | 0           | 5.078852                | -0.149329 | 0.094245  |
| 21            | 6             | 0           | 5.169095                | 1.198065  | -0.344282 |
| 22            | 6             | 0           | 4.050735                | 1.951271  | -0.607244 |
| 23            | 8             | 0           | 6.281981                | -0.745247 | 0.310353  |
| 24            | 6             | 0           | 6.264469                | -2.093486 | 0.739365  |
| 25            | 1             | 0           | 3.767281                | -1.785872 | 0.599590  |
| 26            | 1             | 0           | 6.160946                | 1.612876  | -0.463007 |
| 27            | 1             | 0           | 4.137559                | 2.977882  | -0.938461 |
| 28            | 1             | 0           | 5.780726                | -2.734077 | -0.002909 |
| 29            | 1             | 0           | 7.304307                | -2.387166 | 0.852317  |
| 30            | 1             | 0           | 5.749068                | -2.192928 | 1.698346  |
| 31            | 30            | 0           | -3.516656               | -0.222685 | 0.059417  |
| 32            | 17            | 0           | -4.214341               | -2.021359 | -0.950861 |
| 33            | 17            | 0           | -4.558092               | 1.291112  | 1.226528  |

-----  
**cis-endo-TS-II**

Standard orientation:

Imaginary frequency: -467.1111 cm<sup>-1</sup>

Electronic energy  $E = -4189.683011$  a.u.

Enthalpy  $H = -4189.648815$  a.u.

Entropy  $S = 210.433$  cal/mol/K

Gibbs free energy  $G = -4189.748799$  a.u.

Total free energy in solution  $E_{\text{sol}} = -4190.39191$  a.u.

-----

| Center<br>Number | Atomic<br>Number | Atomic<br>Type | Coordinates (Angstroms) |           |           |
|------------------|------------------|----------------|-------------------------|-----------|-----------|
|                  |                  |                | X                       | Y         | Z         |
| 1                | 6                | 0              | -1.574882               | -0.824677 | -0.507375 |
| 2                | 7                | 0              | 0.815672                | -0.586879 | -0.386462 |
| 3                | 6                | 0              | -0.281233               | -1.377893 | -0.193153 |
| 4                | 6                | 0              | -0.105765               | -2.871498 | -0.238799 |
| 5                | 6                | 0              | -1.847907               | 0.520676  | -0.600324 |
| 6                | 6                | 0              | 0.553167                | 0.793111  | -0.911669 |
| 7                | 6                | 0              | -0.727797               | 1.496167  | -0.448948 |
| 8                | 1                | 0              | -0.913965               | -3.374166 | 0.290602  |
| 9                | 1                | 0              | 0.845566                | -3.190141 | 0.181104  |
| 10               | 1                | 0              | -0.105645               | -3.188392 | -1.287354 |
| 11               | 6                | 0              | -3.250627               | 0.650513  | -0.798725 |
| 12               | 6                | 0              | -3.777101               | -0.662344 | -0.821956 |
| 13               | 7                | 0              | -2.743516               | -1.546390 | -0.624613 |
| 14               | 1                | 0              | -2.818806               | -2.547764 | -0.641351 |
| 15               | 1                | 0              | 0.502270                | 0.674513  | -1.995205 |
| 16               | 1                | 0              | 1.437974                | 1.393222  | -0.708517 |
| 17               | 1                | 0              | -0.868529               | 2.363473  | -1.098676 |
| 18               | 1                | 0              | -0.659835               | 1.873041  | 0.574124  |
| 19               | 6                | 0              | -4.105471               | 1.759843  | -0.961473 |
| 20               | 6                | 0              | -5.451800               | 1.517602  | -1.149243 |
| 21               | 6                | 0              | -5.961179               | 0.194650  | -1.184381 |
| 22               | 6                | 0              | -5.142638               | -0.899508 | -1.025458 |
| 23               | 8                | 0              | -6.396497               | 2.483195  | -1.315233 |
| 24               | 6                | 0              | -5.958027               | 3.826958  | -1.261685 |
| 25               | 1                | 0              | -3.701755               | 2.761304  | -0.931645 |
| 26               | 1                | 0              | -7.025186               | 0.077743  | -1.339541 |
| 27               | 1                | 0              | -5.545716               | -1.903904 | -1.055433 |
| 28               | 1                | 0              | -5.241620               | 4.038662  | -2.060129 |
| 29               | 1                | 0              | -6.845561               | 4.438957  | -1.397721 |
| 30               | 1                | 0              | -5.501682               | 4.051528  | -0.293969 |
| 31               | 6                | 0              | 1.671250                | 1.738030  | 2.150819  |
| 32               | 6                | 0              | 2.931088                | 2.092855  | 1.455635  |
| 33               | 6                | 0              | 1.249738                | 0.345935  | 1.995616  |
| 34               | 6                | 0              | 1.902603                | -0.506425 | 1.066136  |
| 35               | 6                | 0              | 3.583751                | 1.167333  | 0.647187  |
| 36               | 8                | 0              | 3.101555                | -0.129468 | 0.494775  |
| 37               | 8                | 0              | 1.031855                | 2.557085  | 2.793721  |
| 38               | 6                | 0              | -0.006807               | -0.061131 | 2.436818  |
| 39               | 6                | 0              | -0.527053               | -1.316002 | 2.180064  |
| 40               | 1                | 0              | 1.938133                | -1.573442 | 1.251463  |
| 41               | 1                | 0              | -0.659123               | 0.697466  | 2.857897  |
| 42               | 6                | 0              | -1.966568               | -1.515861 | 2.407447  |
| 43               | 8                | 0              | -2.761026               | -0.635704 | 2.644396  |
| 44               | 1                | 0              | 0.093020                | -2.198327 | 2.118301  |
| 45               | 8                | 0              | -2.325034               | -2.811737 | 2.259864  |
| 46               | 6                | 0              | -3.729253               | -3.048950 | 2.427075  |
| 47               | 1                | 0              | -4.038201               | -2.771434 | 3.432835  |
| 48               | 1                | 0              | -4.297474               | -2.457811 | 1.709323  |
| 49               | 1                | 0              | -3.869206               | -4.113295 | 2.262406  |
| 50               | 6                | 0              | 3.471697                | 3.376348  | 1.569447  |
| 51               | 6                | 0              | 4.635570                | 3.708032  | 0.895738  |
| 52               | 6                | 0              | 5.267026                | 2.756771  | 0.089885  |
| 53               | 6                | 0              | 4.746516                | 1.476274  | -0.042418 |
| 54               | 1                | 0              | 2.947087                | 4.085385  | 2.196043  |

-----

|    |    |   |          |           |           |
|----|----|---|----------|-----------|-----------|
| 55 | 1  | 0 | 5.052831 | 4.701671  | 0.987443  |
| 56 | 1  | 0 | 6.171634 | 3.014335  | -0.444691 |
| 57 | 1  | 0 | 5.211223 | 0.730546  | -0.673121 |
| 58 | 30 | 0 | 2.604284 | -1.226695 | -1.383286 |
| 59 | 17 | 0 | 3.073656 | 0.054447  | -3.078007 |
| 60 | 17 | 0 | 3.306480 | -3.206050 | -0.771158 |

**cis-exo-TS-II**

Standard orientation:

Imaginary frequency: -467.0666 cm<sup>-1</sup>

Electronic energy  $E = -4189.677784$  a.u.

Enthalpy  $H = -4189.643901$  a.u.

Center Atomic Atomic Coordinates (Angstroms)  
Number Number Type X Y Z

Entropy  $S = 207.348$  cal/mol/K

Gibbs free energy  $G = -4189.742418$  a.u.

Total free energy in solution  $E_{\text{sol}} = -4190.85753$  a.u.

|    |    |   |           |           |           |
|----|----|---|-----------|-----------|-----------|
| 1  | 6  | 0 | 1.628265  | 0.035372  | 0.562969  |
| 2  | 7  | 0 | -0.594608 | -0.408179 | -0.289690 |
| 3  | 6  | 0 | 0.222653  | 0.407588  | 0.470043  |
| 4  | 6  | 0 | -0.388884 | 1.112795  | 1.647089  |
| 5  | 6  | 0 | 2.296851  | -0.699621 | -0.382522 |
| 6  | 6  | 0 | 0.098412  | -1.520639 | -1.017242 |
| 7  | 6  | 0 | 1.511281  | -1.235623 | -1.533755 |
| 8  | 1  | 0 | 0.196143  | 1.991690  | 1.920179  |
| 9  | 1  | 0 | -0.436979 | 0.418049  | 2.490776  |
| 10 | 1  | 0 | -1.411910 | 1.418690  | 1.440930  |
| 11 | 6  | 0 | 3.672871  | -0.710714 | -0.008573 |
| 12 | 6  | 0 | 3.767191  | 0.038111  | 1.187884  |
| 13 | 7  | 0 | 2.510779  | 0.500475  | 1.508908  |
| 14 | 1  | 0 | 2.269974  | 1.034455  | 2.325895  |
| 15 | 1  | 0 | -0.571572 | -1.845011 | -1.812785 |
| 16 | 1  | 0 | 0.164847  | -2.350910 | -0.314307 |
| 17 | 1  | 0 | 1.518366  | -0.542224 | -2.382912 |
| 18 | 1  | 0 | 1.920066  | -2.178957 | -1.901973 |
| 19 | 6  | 0 | 4.828272  | -1.286603 | -0.574617 |
| 20 | 6  | 0 | 6.032835  | -1.099626 | 0.076721  |
| 21 | 6  | 0 | 6.108283  | -0.354287 | 1.279420  |
| 22 | 6  | 0 | 4.990261  | 0.213619  | 1.846945  |
| 23 | 1  | 0 | 4.755533  | -1.856159 | -1.489922 |
| 24 | 1  | 0 | 5.060847  | 0.776407  | 2.769206  |
| 25 | 1  | 0 | 7.081631  | -0.251699 | 1.739630  |
| 26 | 8  | 0 | 7.227852  | -1.593315 | -0.350537 |
| 27 | 6  | 0 | 7.218568  | -2.369841 | -1.532447 |
| 28 | 1  | 0 | 6.588150  | -3.255502 | -1.414918 |
| 29 | 1  | 0 | 6.866187  | -1.783425 | -2.385516 |
| 30 | 1  | 0 | 8.247702  | -2.674907 | -1.701097 |
| 31 | 30 | 0 | -2.272229 | -1.340394 | 0.608682  |
| 32 | 17 | 0 | -2.233089 | -3.498621 | 0.130340  |
| 33 | 17 | 0 | -3.184943 | -0.547369 | 2.436975  |
| 34 | 6  | 0 | -3.146035 | 2.213903  | -0.775467 |
| 35 | 6  | 0 | -4.070047 | 1.060099  | -0.696497 |
| 36 | 6  | 0 | -1.791769 | 1.850133  | -1.214451 |
| 37 | 6  | 0 | -1.526230 | 0.536501  | -1.689166 |
| 38 | 6  | 0 | -3.697318 | -0.175736 | -1.232742 |
| 39 | 8  | 0 | -2.540013 | -0.313163 | -1.980130 |
| 40 | 8  | 0 | -3.458312 | 3.337956  | -0.425793 |
| 41 | 6  | 0 | -0.713401 | 2.617241  | -0.803615 |
| 42 | 6  | 0 | 0.583086  | 2.116347  | -0.856731 |
| 43 | 1  | 0 | -0.720892 | 0.387101  | -2.394612 |
| 44 | 1  | 0 | -0.915668 | 3.523629  | -0.242679 |
| 45 | 6  | 0 | 1.681379  | 2.873809  | -0.225264 |
| 46 | 8  | 0 | 1.547157  | 3.645713  | 0.701302  |
| 47 | 1  | 0 | 0.892789  | 1.446767  | -1.645607 |
| 48 | 8  | 0 | 2.861970  | 2.559297  | -0.771341 |



|    |   |   |           |           |           |
|----|---|---|-----------|-----------|-----------|
| 49 | 6 | 0 | 3.999666  | 3.186018  | -0.164455 |
| 50 | 1 | 0 | 3.974721  | 4.258614  | -0.349607 |
| 51 | 1 | 0 | 3.997393  | 3.003679  | 0.907940  |
| 52 | 1 | 0 | 4.866883  | 2.726655  | -0.627904 |
| 53 | 6 | 0 | -5.273070 | 1.153332  | -0.000048 |
| 54 | 6 | 0 | -6.083641 | 0.036739  | 0.147019  |
| 55 | 6 | 0 | -5.698973 | -1.184345 | -0.405163 |
| 56 | 6 | 0 | -4.507197 | -1.300832 | -1.114565 |
| 57 | 1 | 0 | -5.530956 | 2.111170  | 0.431597  |
| 58 | 1 | 0 | -7.006524 | 0.108272  | 0.705999  |
| 59 | 1 | 0 | -6.323063 | -2.058928 | -0.280659 |
| 60 | 1 | 0 | -4.192536 | -2.234228 | -1.559653 |

**cis-COM-III**

Standard orientation:

Center Atomic Atomic Coordinates (Angstroms)  
Number Number Type X Y Z

|    |    |   |           |           |           |
|----|----|---|-----------|-----------|-----------|
| 1  | 6  | 0 | 0.466995  | 2.434093  | -0.082951 |
| 2  | 6  | 0 | -1.010145 | 2.429181  | -0.087766 |
| 3  | 6  | 0 | 1.089015  | 1.094794  | -0.143131 |
| 4  | 6  | 0 | 0.317027  | 0.001729  | -0.231507 |
| 5  | 6  | 0 | -1.726002 | 1.238467  | -0.137740 |
| 6  | 8  | 0 | -1.056275 | 0.017384  | -0.199234 |
| 7  | 8  | 0 | 1.121536  | 3.458305  | -0.047835 |
| 8  | 6  | 0 | 2.552043  | 1.014272  | -0.156831 |
| 9  | 6  | 0 | 3.266623  | -0.036020 | 0.254583  |
| 10 | 1  | 0 | 0.688946  | -1.002551 | -0.374614 |
| 11 | 1  | 0 | 3.073124  | 1.896940  | -0.509934 |
| 12 | 6  | 0 | 4.745002  | 0.008692  | 0.153880  |
| 13 | 8  | 0 | 5.389127  | 0.932182  | -0.284215 |
| 14 | 1  | 0 | 2.829637  | -0.929075 | 0.683265  |
| 15 | 8  | 0 | 5.289727  | -1.125576 | 0.620627  |
| 16 | 6  | 0 | 6.721257  | -1.166028 | 0.559126  |
| 17 | 1  | 0 | 7.053924  | -1.064434 | -0.472197 |
| 18 | 1  | 0 | 7.143597  | -0.356757 | 1.151886  |
| 19 | 1  | 0 | 7.003875  | -2.132355 | 0.964512  |
| 20 | 30 | 0 | -1.927648 | -1.915496 | -0.041859 |
| 21 | 17 | 0 | -0.765068 | -3.032911 | -1.444265 |
| 22 | 17 | 0 | -3.395411 | -1.934111 | 1.502290  |
| 23 | 6  | 0 | -1.720343 | 3.633578  | -0.050422 |
| 24 | 6  | 0 | -3.103444 | 3.630181  | -0.064117 |
| 25 | 6  | 0 | -3.795322 | 2.415829  | -0.115673 |
| 26 | 6  | 0 | -3.114009 | 1.208860  | -0.155011 |
| 27 | 1  | 0 | -1.146599 | 4.549911  | -0.012431 |
| 28 | 1  | 0 | -3.650438 | 4.562597  | -0.034664 |
| 29 | 1  | 0 | -4.877044 | 2.407561  | -0.123523 |
| 30 | 1  | 0 | -3.646545 | 0.268317  | -0.172367 |

Imaginary frequency: none  
Electronic energy  $E = -3501.458767$  a.u.  
Enthalpy  $H = -3501.437441$  a.u.  
Entropy  $S = 159.056$  cal/mol/K  
Gibbs free energy  $G = -3501.513014$  a.u.  
Total free energy in solution  $E_{\text{sol}} = -3502.20236$  a.u.

**cis-endo-TS-III**

Standard orientation:

Center Atomic Atomic Coordinates (Angstroms)  
Number Number Type X Y Z

|  |  |  |  |  |  |
|--|--|--|--|--|--|
|  |  |  |  |  |  |
|--|--|--|--|--|--|

Imaginary frequency:  $-273.0813$  cm<sup>-1</sup>  
Electronic energy  $E = -4189.659803$  a.u.  
Enthalpy  $H = -4189.624987$  a.u.  
Entropy  $S = 216.177$  cal/mol/K  
Gibbs free energy  $G = -4189.727699$  a.u.

Total free energy in solution  $E_{\text{sol}} = -4190.84757$  a.u.

---

|    |    |   |           |           |           |
|----|----|---|-----------|-----------|-----------|
| 1  | 6  | 0 | -1.919194 | -0.717674 | -1.380907 |
| 2  | 7  | 0 | 0.307477  | 0.037212  | -1.039194 |
| 3  | 6  | 0 | -0.504871 | -0.958904 | -1.236776 |
| 4  | 6  | 0 | -0.006757 | -2.372850 | -1.303781 |
| 5  | 6  | 0 | -2.509473 | 0.474397  | -1.021097 |
| 6  | 6  | 0 | -0.240097 | 1.398776  | -1.181564 |
| 7  | 6  | 0 | -1.649158 | 1.623159  | -0.612515 |
| 8  | 1  | 0 | -0.378603 | -2.965353 | -0.463969 |
| 9  | 1  | 0 | 1.077814  | -2.427326 | -1.325431 |
| 10 | 1  | 0 | -0.381223 | -2.827918 | -2.224860 |
| 11 | 6  | 0 | -3.913124 | 0.249066  | -0.993047 |
| 12 | 6  | 0 | -4.114306 | -1.099247 | -1.373114 |
| 13 | 7  | 0 | -2.890119 | -1.670111 | -1.608840 |
| 14 | 1  | 0 | -2.733022 | -2.637563 | -1.826874 |
| 15 | 1  | 0 | -0.264032 | 1.586668  | -2.258592 |
| 16 | 1  | 0 | 0.467996  | 2.091194  | -0.734428 |
| 17 | 1  | 0 | -2.021433 | 2.567817  | -1.015055 |
| 18 | 1  | 0 | -1.645819 | 1.711924  | 0.477089  |
| 19 | 6  | 0 | -5.013696 | 1.067732  | -0.659711 |
| 20 | 6  | 0 | -6.275366 | 0.511705  | -0.723698 |
| 21 | 6  | 0 | -6.461048 | -0.839160 | -1.120057 |
| 22 | 6  | 0 | -5.401811 | -1.651109 | -1.448966 |
| 23 | 8  | 0 | -7.428598 | 1.169306  | -0.429296 |
| 24 | 6  | 0 | -7.308657 | 2.514071  | -0.003136 |
| 25 | 1  | 0 | -4.850642 | 2.091284  | -0.355599 |
| 26 | 1  | 0 | -7.477073 | -1.208979 | -1.151434 |
| 27 | 1  | 0 | -5.561535 | -2.679939 | -1.744907 |
| 28 | 1  | 0 | -6.856116 | 3.132623  | -0.782847 |
| 29 | 1  | 0 | -8.319946 | 2.858582  | 0.194004  |
| 30 | 1  | 0 | -6.711737 | 2.583184  | 0.909891  |
| 31 | 6  | 0 | 1.763987  | 1.973653  | 1.506016  |
| 32 | 6  | 0 | 2.801679  | 2.306443  | 0.485231  |
| 33 | 6  | 0 | 1.171939  | 0.662518  | 1.362062  |
| 34 | 6  | 0 | 1.568765  | -0.186576 | 0.312218  |
| 35 | 6  | 0 | 3.245861  | 1.357212  | -0.425712 |
| 36 | 8  | 0 | 2.804648  | 0.025298  | -0.311928 |
| 37 | 8  | 0 | 1.428357  | 2.799542  | 2.347258  |
| 38 | 6  | 0 | -0.064483 | 0.381587  | 2.036421  |
| 39 | 6  | 0 | -0.832015 | -0.719343 | 1.883113  |
| 40 | 1  | 0 | 1.424598  | -1.251229 | 0.415556  |
| 41 | 1  | 0 | -0.462253 | 1.198050  | 2.632043  |
| 42 | 6  | 0 | -2.231210 | -0.691459 | 2.319420  |
| 43 | 8  | 0 | -2.787508 | 0.223927  | 2.888090  |
| 44 | 1  | 0 | -0.507572 | -1.609449 | 1.362682  |
| 45 | 8  | 0 | -2.881163 | -1.812265 | 1.929971  |
| 46 | 6  | 0 | -4.284934 | -1.804291 | 2.209094  |
| 47 | 1  | 0 | -4.456907 | -1.708248 | 3.279743  |
| 48 | 1  | 0 | -4.766609 | -0.975278 | 1.691692  |
| 49 | 1  | 0 | -4.663331 | -2.753846 | 1.841296  |
| 50 | 6  | 0 | 3.296045  | 3.606363  | 0.373113  |
| 51 | 6  | 0 | 4.204354  | 3.927850  | -0.625078 |
| 52 | 6  | 0 | 4.620909  | 2.951942  | -1.531590 |
| 53 | 6  | 0 | 4.139706  | 1.650963  | -1.441319 |
| 54 | 1  | 0 | 2.940943  | 4.335819  | 1.089050  |
| 55 | 1  | 0 | 4.588908  | 4.935906  | -0.704253 |
| 56 | 1  | 0 | 5.326386  | 3.200263  | -2.313215 |
| 57 | 1  | 0 | 4.461953  | 0.880279  | -2.127570 |
| 58 | 30 | 0 | 4.236224  | -1.445676 | -0.027480 |
| 59 | 17 | 0 | 3.124701  | -3.256096 | 0.342822  |
| 60 | 17 | 0 | 6.238644  | -0.760099 | -0.303048 |

---

**cis-exo-TS-III**

Standard orientation:

Imaginary frequency: -298.8885 cm<sup>-1</sup>Electronic energy  $E = -4189.658685$  a.u.Enthalpy  $H = -4189.623936$  a.u.Entropy  $S = 216.919$  cal/mol/KGibbs free energy  $G = -4189.727001$  a.u.Total free energy in solution  $E_{\text{sol}} = -4190.85166$  a.u.

| Center<br>Number | Atomic<br>Number | Atomic<br>Type | Coordinates (Angstroms) |           |           |
|------------------|------------------|----------------|-------------------------|-----------|-----------|
|                  |                  |                | X                       | Y         | Z         |
| 1                | 6                | 0              | 1.909432                | -0.672498 | -1.200314 |
| 2                | 7                | 0              | -0.393361               | -0.154223 | -0.966068 |
| 3                | 6                | 0              | 0.530865                | -1.074995 | -1.075677 |
| 4                | 6                | 0              | 0.177358                | -2.524840 | -1.203478 |
| 5                | 6                | 0              | 2.349311                | 0.601820  | -0.909229 |
| 6                | 6                | 0              | 0.012380                | 1.243165  | -1.202632 |
| 7                | 6                | 0              | 1.346221                | 1.659464  | -0.575110 |
| 8                | 1                | 0              | 0.776361                | -3.143596 | -0.533241 |
| 9                | 1                | 0              | 0.387518                | -2.814253 | -2.239302 |
| 10               | 1                | 0              | -0.878622               | -2.697520 | -1.024192 |
| 11               | 6                | 0              | 3.770082                | 0.558399  | -0.902224 |
| 12               | 6                | 0              | 4.134679                | -0.771905 | -1.221109 |
| 13               | 7                | 0              | 2.988563                | -1.505505 | -1.398125 |
| 14               | 1                | 0              | 2.946657                | -2.498467 | -1.547498 |
| 15               | 1                | 0              | -0.793382               | 1.886943  | -0.855210 |
| 16               | 1                | 0              | 0.085634                | 1.351656  | -2.288108 |
| 17               | 1                | 0              | 1.259809                | 1.788714  | 0.509462  |
| 18               | 1                | 0              | 1.626168                | 2.632636  | -0.983709 |
| 19               | 6                | 0              | 4.764815                | 1.525379  | -0.642701 |
| 20               | 6                | 0              | 6.085112                | 1.130307  | -0.715149 |
| 21               | 6                | 0              | 6.434123                | -0.204499 | -1.050007 |
| 22               | 6                | 0              | 5.479768                | -1.159409 | -1.308843 |
| 23               | 1                | 0              | 4.480930                | 2.537155  | -0.391861 |
| 24               | 1                | 0              | 5.761941                | -2.173621 | -1.560897 |
| 25               | 1                | 0              | 7.488353                | -0.442580 | -1.095152 |
| 26               | 8                | 0              | 7.151873                | 1.942906  | -0.485373 |
| 27               | 6                | 0              | 6.873999                | 3.282488  | -0.124041 |
| 28               | 1                | 0              | 6.332327                | 3.799337  | -0.920635 |
| 29               | 1                | 0              | 6.291395                | 3.326020  | 0.799962  |
| 30               | 1                | 0              | 7.837906                | 3.759441  | 0.029461  |
| 31               | 6                | 0              | -2.668979               | -2.398482 | 0.779627  |
| 32               | 6                | 0              | -3.632275               | -1.901043 | -0.245446 |
| 33               | 6                | 0              | -1.596855               | -1.479181 | 1.090266  |
| 34               | 6                | 0              | -1.544887               | -0.218724 | 0.459873  |
| 35               | 6                | 0              | -3.601000               | -0.585661 | -0.690383 |
| 36               | 8                | 0              | -2.719254               | 0.323456  | -0.078108 |
| 37               | 8                | 0              | -2.765260               | -3.533359 | 1.231474  |
| 38               | 6                | 0              | -0.391187               | -1.987835 | 1.660818  |
| 39               | 6                | 0              | 0.774893                | -1.304979 | 1.771948  |
| 40               | 1                | 0              | -1.012259               | 0.578046  | 0.963098  |
| 41               | 1                | 0              | -0.387327               | -3.051978 | 1.876387  |
| 42               | 6                | 0              | 2.035742                | -2.021395 | 1.960716  |
| 43               | 8                | 0              | 2.185329                | -3.227653 | 1.923284  |
| 44               | 1                | 0              | 0.851782                | -0.232627 | 1.655836  |
| 45               | 8                | 0              | 3.066708                | -1.160736 | 2.090486  |
| 46               | 6                | 0              | 4.356817                | -1.770764 | 2.159949  |
| 47               | 1                | 0              | 4.455385                | -2.342045 | 3.082032  |
| 48               | 1                | 0              | 4.505747                | -2.436239 | 1.311238  |
| 49               | 1                | 0              | 5.070653                | -0.952495 | 2.129431  |
| 50               | 6                | 0              | -4.550972               | -2.771968 | -0.832416 |
| 51               | 6                | 0              | -5.400469               | -2.325532 | -1.833861 |
| 52               | 6                | 0              | -5.332518               | -1.000587 | -2.267080 |
| 53               | 6                | 0              | -4.425149               | -0.114303 | -1.698231 |
| 54               | 1                | 0              | -4.566358               | -3.792682 | -0.473736 |
| 55               | 1                | 0              | -6.113777               | -3.003929 | -2.282720 |

|    |    |   |           |           |           |
|----|----|---|-----------|-----------|-----------|
| 56 | 1  | 0 | -5.989214 | -0.650294 | -3.052130 |
| 57 | 1  | 0 | -4.369114 | 0.916354  | -2.018094 |
| 58 | 30 | 0 | -3.321390 | 2.164442  | 0.629035  |
| 59 | 17 | 0 | -1.585768 | 3.025574  | 1.584543  |
| 60 | 17 | 0 | -5.312833 | 2.698508  | 0.063821  |

**cis-COM-IV**

Standard orientation:

| Center Number | Atomic Number | Atomic Type | Coordinates (Angstroms) |           |           |
|---------------|---------------|-------------|-------------------------|-----------|-----------|
|               |               |             | X                       | Y         | Z         |
| 1             | 30            | 0           | -1.447959               | 2.875415  | 0.327282  |
| 2             | 17            | 0           | -1.896629               | 4.334825  | -1.199280 |
| 3             | 17            | 0           | -1.684879               | 2.582882  | 2.459182  |
| 4             | 6             | 0           | -1.390530               | 0.039619  | -0.180145 |
| 5             | 6             | 0           | -2.836071               | -0.112854 | -0.185880 |
| 6             | 6             | 0           | -0.620386               | -1.159518 | 0.061173  |
| 7             | 6             | 0           | -1.284057               | -2.285248 | 0.431873  |
| 8             | 6             | 0           | -3.396020               | -1.337926 | 0.182273  |
| 9             | 8             | 0           | -2.608487               | -2.401619 | 0.512756  |
| 10            | 8             | 0           | -0.827450               | 1.136729  | -0.388983 |
| 11            | 6             | 0           | 0.842533                | -1.107467 | 0.005611  |
| 12            | 6             | 0           | 1.626507                | -2.148154 | -0.286506 |
| 13            | 1             | 0           | -0.784687               | -3.196307 | 0.728838  |
| 14            | 1             | 0           | 1.304304                | -0.147448 | 0.205706  |
| 15            | 6             | 0           | 3.098794                | -1.971491 | -0.269437 |
| 16            | 8             | 0           | 3.674166                | -0.939648 | -0.018896 |
| 17            | 1             | 0           | 1.248723                | -3.125567 | -0.559617 |
| 18            | 8             | 0           | 3.722217                | -3.120259 | -0.573037 |
| 19            | 6             | 0           | 5.154021                | -3.033858 | -0.578630 |
| 20            | 1             | 0           | 5.480986                | -2.306446 | -1.319018 |
| 21            | 1             | 0           | 5.513483                | -2.730768 | 0.402832  |
| 22            | 1             | 0           | 5.505742                | -4.029174 | -0.830840 |
| 23            | 6             | 0           | -3.697304               | 0.937720  | -0.548455 |
| 24            | 6             | 0           | -5.063251               | 0.756822  | -0.510040 |
| 25            | 6             | 0           | -5.599034               | -0.477256 | -0.107981 |
| 26            | 6             | 0           | -4.774602               | -1.532374 | 0.233948  |
| 27            | 1             | 0           | -3.283396               | 1.873767  | -0.904491 |
| 28            | 1             | 0           | -5.721149               | 1.566012  | -0.794654 |
| 29            | 1             | 0           | -6.672258               | -0.609776 | -0.073624 |
| 30            | 1             | 0           | -5.161625               | -2.495134 | 0.537240  |

Imaginary frequency: none  
 Electronic energy  $E = -3501.485318$  a.u.  
 Enthalpy  $H = -3501.464202$  a.u.  
 Entropy  $S = 158.894$  cal/mol/K  
 Gibbs free energy  $G = -3501.539698$  a.u.  
 Total free energy in solution  $E_{\text{sol}} = -3502.22713$  a.u.

**cis-endo-TS1-IV**

Standard orientation:

| Center Number | Atomic Number | Atomic Type | Coordinates (Angstroms) |           |           |
|---------------|---------------|-------------|-------------------------|-----------|-----------|
|               |               |             | X                       | Y         | Z         |
| 1             | 6             | 0           | -1.220958               | -2.412426 | -0.906435 |
| 2             | 7             | 0           | 1.148676                | -2.496285 | -0.776299 |
| 3             | 6             | 0           | 0.001759                | -3.005041 | -0.428689 |
| 4             | 6             | 0           | -0.074448               | -4.211298 | 0.464641  |
| 5             | 6             | 0           | -1.244771               | -1.134121 | -1.428713 |
| 6             | 6             | 0           | 1.132460                | -1.503522 | -1.864398 |
| 7             | 6             | 0           | 0.028897                | -0.443495 | -1.781074 |
| 8             | 1             | 0           | -0.793972               | -4.063843 | 1.271355  |
| 9             | 1             | 0           | 0.899385                | -4.475001 | 0.872041  |
| 10            | 1             | 0           | -0.408972               | -5.058602 | -0.141829 |

Imaginary frequency:  $-236.6538$  cm<sup>-1</sup>  
 Electronic energy  $E = -4189.691966$  a.u.  
 Enthalpy  $H = -4189.657845$  a.u.  
 Entropy  $S = 213.130$  cal/mol/K  
 Gibbs free energy  $G = -4189.759110$  a.u.  
 Total free energy in solution  $E_{\text{sol}} = -4190.87491$  a.u.

|    |    |   |           |           |           |
|----|----|---|-----------|-----------|-----------|
| 11 | 6  | 0 | -2.593020 | -0.693862 | -1.397023 |
| 12 | 6  | 0 | -3.358589 | -1.766119 | -0.882550 |
| 13 | 7  | 0 | -2.507764 | -2.802949 | -0.585199 |
| 14 | 1  | 0 | -2.776401 | -3.673748 | -0.164302 |
| 15 | 1  | 0 | 0.989710  | -2.080232 | -2.783179 |
| 16 | 1  | 0 | 2.117081  | -1.044370 | -1.916842 |
| 17 | 1  | 0 | -0.045394 | 0.054196  | -2.750622 |
| 18 | 1  | 0 | 0.249797  | 0.345384  | -1.060350 |
| 19 | 6  | 0 | -3.197566 | 0.536261  | -1.725053 |
| 20 | 6  | 0 | -4.558414 | 0.650836  | -1.534178 |
| 21 | 6  | 0 | -5.324274 | -0.445873 | -1.055259 |
| 22 | 6  | 0 | -4.749006 | -1.652367 | -0.728804 |
| 23 | 8  | 0 | -5.276416 | 1.778525  | -1.768690 |
| 24 | 6  | 0 | -4.539661 | 2.934166  | -2.142504 |
| 25 | 1  | 0 | -2.585164 | 1.358402  | -2.066035 |
| 26 | 1  | 0 | -6.388713 | -0.289556 | -0.940757 |
| 27 | 1  | 0 | -5.349668 | -2.471388 | -0.353935 |
| 28 | 1  | 0 | -4.052637 | 2.789204  | -3.110196 |
| 29 | 1  | 0 | -5.265291 | 3.739312  | -2.216389 |
| 30 | 1  | 0 | -3.785063 | 3.177666  | -1.391091 |
| 31 | 6  | 0 | 2.677326  | 0.411230  | 0.313311  |
| 32 | 6  | 0 | 3.949756  | 0.089747  | -0.339789 |
| 33 | 6  | 0 | 1.980289  | -0.661563 | 0.910138  |
| 34 | 6  | 0 | 2.390960  | -1.992535 | 0.621570  |
| 35 | 6  | 0 | 4.367111  | -1.238658 | -0.409341 |
| 36 | 8  | 0 | 3.611407  | -2.255156 | 0.119489  |
| 37 | 8  | 0 | 2.284629  | 1.614214  | 0.306762  |
| 38 | 6  | 0 | 0.714342  | -0.436815 | 1.557614  |
| 39 | 6  | 0 | -0.082681 | -1.356632 | 2.124685  |
| 40 | 1  | 0 | 2.080866  | -2.794437 | 1.272124  |
| 41 | 1  | 0 | 0.323061  | 0.572781  | 1.537040  |
| 42 | 6  | 0 | -1.460502 | -0.983359 | 2.484478  |
| 43 | 8  | 0 | -1.935903 | 0.124929  | 2.424639  |
| 44 | 1  | 0 | 0.205821  | -2.384384 | 2.286431  |
| 45 | 8  | 0 | -2.172728 | -2.076150 | 2.844612  |
| 46 | 6  | 0 | -3.550107 | -1.799802 | 3.131794  |
| 47 | 1  | 0 | -3.626913 | -1.080583 | 3.944676  |
| 48 | 1  | 0 | -4.039861 | -1.391395 | 2.248576  |
| 49 | 1  | 0 | -3.987668 | -2.752101 | 3.417981  |
| 50 | 6  | 0 | 4.762500  | 1.082031  | -0.899954 |
| 51 | 6  | 0 | 5.962770  | 0.742188  | -1.499220 |
| 52 | 6  | 0 | 6.362940  | -0.597621 | -1.550329 |
| 53 | 6  | 0 | 5.568290  | -1.597100 | -1.009086 |
| 54 | 1  | 0 | 4.423967  | 2.107341  | -0.843411 |
| 55 | 1  | 0 | 6.591353  | 1.510871  | -1.927769 |
| 56 | 1  | 0 | 7.301522  | -0.862622 | -2.019275 |
| 57 | 1  | 0 | 5.852567  | -2.639959 | -1.039416 |
| 58 | 30 | 0 | 0.738546  | 2.736129  | 0.657713  |
| 59 | 17 | 0 | 0.625847  | 3.443781  | 2.698574  |
| 60 | 17 | 0 | -0.410112 | 3.135127  | -1.162998 |

**cis-endo-IM1-IV**

Standard orientation:

Imaginary frequency: none

Electronic energy  $E = -4189.698674$  a.u.

Enthalpy  $H = -4189.663691$  a.u.

Center Atomic Atomic Coordinates (Angstroms)  
Number Number Type X Y Z

Entropy  $S = 220.050$  cal/mol/K

Gibbs free energy  $G = -4189.768244$  a.u.

Total free energy in solution  $E_{\text{sol}} = -4190.88867$  a.u.

---

|    |    |   |           |           |           |
|----|----|---|-----------|-----------|-----------|
| 1  | 6  | 0 | -1.588000 | -2.481270 | -0.447635 |
| 2  | 7  | 0 | 0.752657  | -2.535502 | -0.221078 |
| 3  | 6  | 0 | -0.422665 | -2.950863 | 0.217642  |
| 4  | 6  | 0 | -0.583806 | -3.907738 | 1.363363  |
| 5  | 6  | 0 | -1.551476 | -1.328818 | -1.224991 |
| 6  | 6  | 0 | 0.794497  | -1.900454 | -1.554150 |
| 7  | 6  | 0 | -0.255830 | -0.805913 | -1.735620 |
| 8  | 1  | 0 | -1.298683 | -3.519067 | 2.088910  |
| 9  | 1  | 0 | 0.350873  | -4.151215 | 1.859058  |
| 10 | 1  | 0 | -0.983070 | -4.837570 | 0.946755  |
| 11 | 6  | 0 | -2.864430 | -0.810594 | -1.262516 |
| 12 | 6  | 0 | -3.680585 | -1.715258 | -0.540307 |
| 13 | 7  | 0 | -2.895747 | -2.730853 | -0.062780 |
| 14 | 1  | 0 | -3.198443 | -3.437366 | 0.583460  |
| 15 | 1  | 0 | 0.606728  | -2.703277 | -2.270483 |
| 16 | 1  | 0 | 1.800078  | -1.522922 | -1.711989 |
| 17 | 1  | 0 | -0.321036 | -0.576235 | -2.802076 |
| 18 | 1  | 0 | 0.000763  | 0.127761  | -1.232464 |
| 19 | 6  | 0 | -3.396551 | 0.380262  | -1.802972 |
| 20 | 6  | 0 | -4.737498 | 0.623556  | -1.607142 |
| 21 | 6  | 0 | -5.557943 | -0.316488 | -0.920334 |
| 22 | 6  | 0 | -5.057049 | -1.479199 | -0.386672 |
| 23 | 8  | 0 | -5.388953 | 1.737486  | -2.018245 |
| 24 | 6  | 0 | -4.589262 | 2.772904  | -2.574182 |
| 25 | 1  | 0 | -2.741132 | 1.083250  | -2.296154 |
| 26 | 1  | 0 | -6.605441 | -0.066516 | -0.816056 |
| 27 | 1  | 0 | -5.697629 | -2.168806 | 0.147391  |
| 28 | 1  | 0 | -4.134856 | 2.449909  | -3.514086 |
| 29 | 1  | 0 | -5.264438 | 3.602520  | -2.762119 |
| 30 | 1  | 0 | -3.807389 | 3.077551  | -1.874615 |
| 31 | 6  | 0 | 2.752933  | 0.128534  | 0.242000  |
| 32 | 6  | 0 | 3.878666  | -0.535331 | -0.437913 |
| 33 | 6  | 0 | 1.833601  | -0.682625 | 0.898006  |
| 34 | 6  | 0 | 1.882538  | -2.167861 | 0.732732  |
| 35 | 6  | 0 | 3.989599  | -1.925774 | -0.396717 |
| 36 | 8  | 0 | 3.074834  | -2.716315 | 0.252925  |
| 37 | 8  | 0 | 2.721458  | 1.406653  | 0.209761  |
| 38 | 6  | 0 | 0.674770  | -0.126124 | 1.522788  |
| 39 | 6  | 0 | -0.240600 | -0.788411 | 2.262766  |
| 40 | 1  | 0 | 1.660930  | -2.689303 | 1.657938  |
| 41 | 1  | 0 | 0.443200  | 0.910731  | 1.305943  |
| 42 | 6  | 0 | -1.522619 | -0.155011 | 2.579856  |
| 43 | 8  | 0 | -1.815781 | 1.006330  | 2.423152  |
| 44 | 1  | 0 | -0.101968 | -1.800828 | 2.607828  |
| 45 | 8  | 0 | -2.409660 | -1.081495 | 3.034950  |
| 46 | 6  | 0 | -3.716218 | -0.553902 | 3.289804  |
| 47 | 1  | 0 | -3.664267 | 0.248284  | 4.023285  |
| 48 | 1  | 0 | -4.150171 | -0.165580 | 2.368908  |
| 49 | 1  | 0 | -4.301205 | -1.385937 | 3.673172  |
| 50 | 6  | 0 | 4.858465  | 0.200746  | -1.108951 |
| 51 | 6  | 0 | 5.924554  | -0.439667 | -1.721980 |
| 52 | 6  | 0 | 6.018992  | -1.831074 | -1.664821 |
| 53 | 6  | 0 | 5.053845  | -2.580804 | -1.004063 |
| 54 | 1  | 0 | 4.758885  | 1.277339  | -1.121744 |
| 55 | 1  | 0 | 6.680967  | 0.136514  | -2.237416 |
| 56 | 1  | 0 | 6.850643  | -2.337283 | -2.137929 |
| 57 | 1  | 0 | 5.107245  | -3.659433 | -0.944965 |
| 58 | 30 | 0 | 1.489369  | 2.862784  | 0.322151  |
| 59 | 17 | 0 | 2.107708  | 4.526639  | 1.565844  |
| 60 | 17 | 0 | -0.255518 | 2.681022  | -1.021513 |

---

**cis-endo-TS2-IV**

Standard orientation:

Imaginary frequency: -281.4027 cm<sup>-1</sup>Electronic energy  $E = -4189.690362$  a.u.Enthalpy  $H = -4189.656292$  a.u.Entropy  $S = 213.296$  cal/mol/KGibbs free energy  $G = -4189.757636$  a.u.Total free energy in solution  $E_{\text{sol}} = -4190.87314$  a.u. 1

| Center Number | Atomic Number | Atomic Type | Coordinates (Angstroms) |           |           |
|---------------|---------------|-------------|-------------------------|-----------|-----------|
|               |               |             | X                       | Y         | Z         |
| 6             | 0             | -1.385278   | -2.043148               | -0.558806 |           |
| 2             | 7             | 0           | 0.974649                | -2.322779 | -0.708251 |
| 3             | 6             | 0           | -0.178456               | -2.661076 | -0.052260 |
| 4             | 6             | 0           | -0.271880               | -4.050931 | 0.535754  |
| 5             | 6             | 0           | -1.398742               | -0.871247 | -1.279317 |
| 6             | 6             | 0           | 0.886542                | -1.439151 | -1.894491 |
| 7             | 6             | 0           | -0.122247               | -0.292287 | -1.795227 |
| 8             | 1             | 0           | -1.008816               | -4.092255 | 1.336792  |
| 9             | 1             | 0           | 0.685986                | -4.393884 | 0.923228  |
| 10            | 1             | 0           | -0.564542               | -4.731958 | -0.267900 |
| 11            | 6             | 0           | -2.752486               | -0.440295 | -1.349663 |
| 12            | 6             | 0           | -3.523196               | -1.410825 | -0.669814 |
| 13            | 7             | 0           | -2.672514               | -2.384228 | -0.197984 |
| 14            | 1             | 0           | -2.931644               | -3.140550 | 0.409680  |
| 15            | 1             | 0           | 0.590970                | -2.087010 | -2.722276 |
| 16            | 1             | 0           | 1.888951                | -1.074944 | -2.106877 |
| 17            | 1             | 0           | -0.259093               | 0.127916  | -2.794669 |
| 18            | 1             | 0           | 0.224425                | 0.528534  | -1.165166 |
| 19            | 6             | 0           | -3.364223               | 0.700522  | -1.904296 |
| 20            | 6             | 0           | -4.731256               | 0.830087  | -1.763275 |
| 21            | 6             | 0           | -5.497339               | -0.166612 | -1.106511 |
| 22            | 6             | 0           | -4.914310               | -1.286918 | -0.559009 |
| 23            | 8             | 0           | -5.456172               | 1.888342  | -2.216005 |
| 24            | 6             | 0           | -4.726106               | 2.972587  | -2.763280 |
| 25            | 1             | 0           | -2.757458               | 1.455958  | -2.382217 |
| 26            | 1             | 0           | -6.564625               | -0.004416 | -1.038384 |
| 27            | 1             | 0           | -5.513311               | -2.033498 | -0.052774 |
| 28            | 1             | 0           | -4.205163               | 2.673105  | -3.676732 |
| 29            | 1             | 0           | -5.458920               | 3.739607  | -2.998714 |
| 30            | 1             | 0           | -4.002136               | 3.359322  | -2.041895 |
| 31            | 6             | 0           | 2.776340                | 0.338201  | 0.244277  |
| 32            | 6             | 0           | 3.918935                | 0.001752  | -0.603046 |
| 33            | 6             | 0           | 2.012843                | -0.758055 | 0.752085  |
| 34            | 6             | 0           | 2.171435                | -2.126169 | 0.164992  |
| 35            | 6             | 0           | 4.153223                | -1.333442 | -0.951803 |
| 36            | 8             | 0           | 3.347494                | -2.362328 | -0.569060 |
| 37            | 8             | 0           | 2.529123                | 1.544939  | 0.490779  |
| 38            | 6             | 0           | 0.870036                | -0.560377 | 1.496631  |
| 39            | 6             | 0           | 0.037753                | -1.615911 | 1.884750  |
| 40            | 1             | 0           | 2.133360                | -2.908788 | 0.918817  |
| 41            | 1             | 0           | 0.502696                | 0.441898  | 1.682673  |
| 42            | 6             | 0           | -1.309247               | -1.249535 | 2.342847  |
| 43            | 8             | 0           | -1.809801               | -0.157166 | 2.211092  |
| 44            | 1             | 0           | 0.455782                | -2.536526 | 2.265099  |
| 45            | 8             | 0           | -1.973156               | -2.305428 | 2.872739  |
| 46            | 6             | 0           | -3.305767               | -1.989742 | 3.302241  |
| 47            | 1             | 0           | -3.276612               | -1.227887 | 4.078524  |
| 48            | 1             | 0           | -3.892039               | -1.613081 | 2.464344  |
| 49            | 1             | 0           | -3.717693               | -2.917497 | 3.688678  |
| 50            | 6             | 0           | 4.790855                | 0.996730  | -1.065241 |
| 51            | 6             | 0           | 5.881957                | 0.665801  | -1.846584 |
| 52            | 6             | 0           | 6.106528                | -0.674702 | -2.178110 |
| 53            | 6             | 0           | 5.250278                | -1.673375 | -1.740094 |
| 54            | 1             | 0           | 4.582614                | 2.020368  | -0.785422 |
| 55            | 1             | 0           | 6.555931                | 1.434784  | -2.197916 |

|    |    |   |           |           |           |
|----|----|---|-----------|-----------|-----------|
| 56 | 1  | 0 | 6.959132  | -0.942445 | -2.789015 |
| 57 | 1  | 0 | 5.405706  | -2.712949 | -1.993283 |
| 58 | 30 | 0 | 1.014573  | 2.645520  | 1.073938  |
| 59 | 17 | 0 | 0.982515  | 2.988494  | 3.207491  |
| 60 | 17 | 0 | -0.143849 | 3.257477  | -0.666429 |

**cis-endo-IM2-IV**

Standard orientation:

Center Atomic Atomic Coordinates (Angstroms)  
Number Number Type X Y Z

|    |   |           |           |           |           |
|----|---|-----------|-----------|-----------|-----------|
| 6  | 0 | -1.344306 | 0.156578  | 1.367355  |           |
| 2  | 7 | 0         | -2.250410 | 2.302088  | 0.707344  |
| 3  | 6 | 0         | -2.615917 | 0.900492  | 1.003796  |
| 4  | 6 | 0         | -3.680724 | 0.841227  | 2.100880  |
| 5  | 6 | 0         | -0.174249 | 0.780619  | 1.732097  |
| 6  | 6 | 0         | -1.434095 | 2.912237  | 1.763750  |
| 7  | 6 | 0         | -0.067141 | 2.243886  | 2.011112  |
| 8  | 1 | 0         | -3.928774 | -0.199667 | 2.316627  |
| 9  | 1 | 0         | -4.575915 | 1.373285  | 1.775100  |
| 10 | 1 | 0         | -3.319011 | 1.284934  | 3.026349  |
| 11 | 6 | 0         | 0.850575  | -0.221684 | 1.724240  |
| 12 | 6 | 0         | 0.224326  | -1.433120 | 1.347138  |
| 13 | 7 | 0         | -1.116850 | -1.178846 | 1.157297  |
| 14 | 1 | 0         | -1.802860 | -1.834418 | 0.799045  |
| 15 | 1 | 0         | -2.030081 | 2.864152  | 2.674425  |
| 16 | 1 | 0         | -1.309181 | 3.965772  | 1.526836  |
| 17 | 1 | 0         | 0.229526  | 2.422711  | 3.049321  |
| 18 | 1 | 0         | 0.712763  | 2.692037  | 1.389415  |
| 19 | 6 | 0         | 2.227508  | -0.197235 | 2.006932  |
| 20 | 6 | 0         | 2.935332  | -1.387663 | 1.940940  |
| 21 | 6 | 0         | 2.288612  | -2.601921 | 1.623034  |
| 22 | 6 | 0         | 0.938888  | -2.648145 | 1.321641  |
| 23 | 8 | 0         | 4.268785  | -1.497957 | 2.160630  |
| 24 | 6 | 0         | 5.024555  | -0.301409 | 2.124937  |
| 25 | 1 | 0         | 2.709201  | 0.735462  | 2.264068  |
| 26 | 1 | 0         | 2.896995  | -3.494264 | 1.577443  |
| 27 | 1 | 0         | 0.446455  | -3.584895 | 1.098324  |
| 28 | 1 | 0         | 4.810198  | 0.331361  | 2.990763  |
| 29 | 1 | 0         | 6.067692  | -0.604410 | 2.151447  |
| 30 | 1 | 0         | 4.820935  | 0.248910  | 1.202635  |
| 31 | 6 | 0         | 0.191000  | 0.968032  | -1.563198 |
| 32 | 6 | 0         | 1.068707  | 2.109676  | -1.379593 |
| 33 | 6 | 0         | -1.226130 | 1.186183  | -1.288732 |
| 34 | 6 | 0         | -1.722475 | 2.477322  | -0.683548 |
| 35 | 6 | 0         | 0.526971  | 3.341413  | -0.987001 |
| 36 | 8 | 0         | -0.791140 | 3.546930  | -0.737154 |
| 37 | 8 | 0         | 0.624890  | -0.153779 | -1.860770 |
| 38 | 6 | 0         | -2.069544 | 0.145775  | -1.244197 |
| 39 | 6 | 0         | -3.245598 | 0.350463  | -0.343519 |
| 40 | 1 | 0         | -2.559208 | 2.835637  | -1.285023 |
| 41 | 1 | 0         | -1.792177 | -0.838290 | -1.610278 |
| 42 | 6 | 0         | -4.082076 | -0.892679 | -0.148763 |
| 43 | 8 | 0         | -3.655763 | -1.969712 | 0.206887  |
| 44 | 1 | 0         | -3.908414 | 1.147622  | -0.691658 |
| 45 | 8 | 0         | -5.368588 | -0.665389 | -0.401245 |
| 46 | 6 | 0         | -6.229579 | -1.806752 | -0.232097 |
| 47 | 1 | 0         | -5.911424 | -2.609443 | -0.893234 |
| 48 | 1 | 0         | -6.188974 | -2.149325 | 0.799794  |
| 49 | 1 | 0         | -7.223788 | -1.457462 | -0.489003 |

Imaginary frequency: none  
 Electronic energy  $E = -4189.721766$  a.u.  
 Enthalpy  $H = -4189.688506$  a.u.  
 Entropy  $S = 205.941$  cal/mol/K  
 Gibbs free energy  $G = -4189.786355$  a.u.  
 Total free energy in solution  $E_{\text{sol}} = -4190.89655$  a.u. 1



|    |    |   |           |           |           |
|----|----|---|-----------|-----------|-----------|
| 50 | 6  | 0 | 2.455087  | 1.976331  | -1.562550 |
| 51 | 6  | 0 | 3.283024  | 3.068040  | -1.387930 |
| 52 | 6  | 0 | 2.726057  | 4.302158  | -1.028146 |
| 53 | 6  | 0 | 1.362803  | 4.446498  | -0.823473 |
| 54 | 1  | 0 | 2.842164  | 1.001244  | -1.836567 |
| 55 | 1  | 0 | 4.350216  | 2.972409  | -1.533384 |
| 56 | 1  | 0 | 3.369808  | 5.163036  | -0.897459 |
| 57 | 1  | 0 | 0.924686  | 5.390544  | -0.529719 |
| 58 | 30 | 0 | 1.185618  | -1.929458 | -1.044764 |
| 59 | 17 | 0 | -0.500038 | -3.257362 | -1.617045 |
| 60 | 17 | 0 | 3.351586  | -1.802319 | -1.436026 |

**cis-exo-TS1-IV**

Standard orientation:

Center Atomic Atomic Coordinates (Angstroms)  
Number Number Type X Y Z

|    |   |   |           |           |           |
|----|---|---|-----------|-----------|-----------|
| 1  | 6 | 0 | -1.384270 | -1.411504 | -1.158656 |
| 2  | 7 | 0 | 0.283840  | -2.558374 | 0.074040  |
| 3  | 6 | 0 | -0.012918 | -1.759379 | -0.904987 |
| 4  | 6 | 0 | 1.057578  | -1.167863 | -1.761498 |
| 5  | 6 | 0 | -2.424205 | -1.808943 | -0.348079 |
| 6  | 6 | 0 | -0.783293 | -3.370309 | 0.675711  |
| 7  | 6 | 0 | -2.188867 | -2.738464 | 0.794595  |
| 8  | 1 | 0 | 1.176047  | -0.098565 | -1.576253 |
| 9  | 1 | 0 | 0.751610  | -1.281924 | -2.805103 |
| 10 | 1 | 0 | 2.001275  | -1.687916 | -1.621590 |
| 11 | 6 | 0 | -3.556540 | -1.034637 | -0.721786 |
| 12 | 6 | 0 | -3.130412 | -0.180963 | -1.765906 |
| 13 | 7 | 0 | -1.813189 | -0.447314 | -2.049073 |
| 14 | 1 | 0 | -1.194419 | 0.221759  | -2.485727 |
| 15 | 1 | 0 | -0.436364 | -3.710770 | 1.653262  |
| 16 | 1 | 0 | -0.859422 | -4.257690 | 0.042485  |
| 17 | 1 | 0 | -2.332079 | -2.184471 | 1.726060  |
| 18 | 1 | 0 | -2.911021 | -3.558325 | 0.806448  |
| 19 | 6 | 0 | -4.881410 | -0.971869 | -0.238688 |
| 20 | 6 | 0 | -5.728229 | -0.042379 | -0.806045 |
| 21 | 6 | 0 | -5.283039 | 0.818619  | -1.844108 |
| 22 | 6 | 0 | -4.000666 | 0.761834  | -2.334278 |
| 23 | 1 | 0 | -5.199720 | -1.632487 | 0.554833  |
| 24 | 1 | 0 | -3.673342 | 1.428608  | -3.120734 |
| 25 | 1 | 0 | -5.998537 | 1.527875  | -2.237828 |
| 26 | 8 | 0 | -7.027807 | 0.144467  | -0.445679 |
| 27 | 6 | 0 | -7.527615 | -0.670253 | 0.595536  |
| 28 | 1 | 0 | -7.479453 | -1.728507 | 0.324630  |
| 29 | 1 | 0 | -6.970435 | -0.508041 | 1.523072  |
| 30 | 1 | 0 | -8.564096 | -0.377144 | 0.738172  |
| 31 | 6 | 0 | 3.017010  | -0.131971 | 0.438056  |
| 32 | 6 | 0 | 4.030231  | -1.113962 | 0.043425  |
| 33 | 6 | 0 | 1.888447  | -0.622545 | 1.112925  |
| 34 | 6 | 0 | 1.710914  | -2.031584 | 1.255539  |
| 35 | 6 | 0 | 3.836688  | -2.460615 | 0.349372  |
| 36 | 8 | 0 | 2.727711  | -2.885051 | 1.034884  |
| 37 | 8 | 0 | 3.222232  | 1.090944  | 0.152720  |
| 38 | 6 | 0 | 0.823375  | 0.269199  | 1.495582  |
| 39 | 6 | 0 | -0.371148 | -0.067293 | 2.004756  |
| 40 | 1 | 0 | 1.108893  | -2.385741 | 2.082629  |
| 41 | 1 | 0 | 0.972329  | 1.323040  | 1.302258  |
| 42 | 6 | 0 | -1.406708 | 0.967083  | 2.159610  |

Imaginary frequency: -215.6361 cm<sup>-1</sup>

Electronic energy  $E = -4189.692478$  a.u.

Enthalpy  $H = -4189.657788$  a.u.

Entropy  $S = 179.937$  cal/mol/K

Gibbs free energy  $G = -4189.761774$  a.u.

Total free energy in solution  $E_{\text{sol}} = -4190.87599$  a.u.

|    |    |   |           |           |           |
|----|----|---|-----------|-----------|-----------|
| 43 | 8  | 0 | -1.247097 | 2.157310  | 2.025075  |
| 44 | 1  | 0 | -0.654114 | -1.083412 | 2.235241  |
| 45 | 8  | 0 | -2.604787 | 0.404643  | 2.429558  |
| 46 | 6  | 0 | -3.696646 | 1.332608  | 2.450346  |
| 47 | 1  | 0 | -3.523268 | 2.101981  | 3.199980  |
| 48 | 1  | 0 | -3.805048 | 1.797833  | 1.471785  |
| 49 | 1  | 0 | -4.577049 | 0.744293  | 2.692467  |
| 50 | 6  | 0 | 5.195867  | -0.739398 | -0.636263 |
| 51 | 6  | 0 | 6.133011  | -1.693917 | -0.989855 |
| 52 | 6  | 0 | 5.916625  | -3.039030 | -0.669249 |
| 53 | 6  | 0 | 4.768180  | -3.431914 | 0.000556  |
| 54 | 1  | 0 | 5.336394  | 0.308476  | -0.862885 |
| 55 | 1  | 0 | 7.034117  | -1.401106 | -1.511417 |
| 56 | 1  | 0 | 6.650872  | -3.784470 | -0.945825 |
| 57 | 1  | 0 | 4.577315  | -4.463540 | 0.262352  |
| 58 | 30 | 0 | 2.204192  | 2.677745  | -0.245539 |
| 59 | 17 | 0 | 3.069177  | 4.517714  | 0.483917  |
| 60 | 17 | 0 | 0.494082  | 2.313812  | -1.602096 |

**cis-exo-IM1-IV**

Standard orientation:

Center Atomic Atomic Coordinates (Angstroms)  
Number Number Type X Y Z

|    |   |           |           |           |           |
|----|---|-----------|-----------|-----------|-----------|
| 6  | 0 | -2.008292 | -1.450788 | -0.416930 |           |
| 2  | 7 | 0         | -0.369727 | -1.464856 | 1.257060  |
| 3  | 6 | 0         | -0.641227 | -1.574723 | -0.024222 |
| 4  | 6 | 0         | 0.394318  | -1.792929 | -1.070484 |
| 5  | 6 | 0         | -3.006853 | -0.978002 | 0.419231  |
| 6  | 6 | 0         | -1.481884 | -1.528946 | 2.231933  |
| 7  | 6 | 0         | -2.676483 | -0.664258 | 1.840169  |
| 8  | 1 | 0         | 0.694438  | -0.824973 | -1.490521 |
| 9  | 1 | 0         | -0.036280 | -2.398390 | -1.868997 |
| 10 | 1 | 0         | 1.268579  | -2.309471 | -0.692311 |
| 11 | 6 | 0         | -4.167014 | -0.800889 | -0.370591 |
| 12 | 6 | 0         | -3.816634 | -1.189426 | -1.687240 |
| 13 | 7 | 0         | -2.508692 | -1.584344 | -1.696547 |
| 14 | 1 | 0         | -1.973617 | -1.784042 | -2.523631 |
| 15 | 1 | 0         | -1.087732 | -1.240897 | 3.203079  |
| 16 | 1 | 0         | -1.795549 | -2.575589 | 2.283389  |
| 17 | 1 | 0         | -2.456925 | 0.402800  | 1.948001  |
| 18 | 1 | 0         | -3.502242 | -0.902940 | 2.512685  |
| 19 | 6 | 0         | -5.475107 | -0.348620 | -0.079678 |
| 20 | 6 | 0         | -6.380881 | -0.300672 | -1.115571 |
| 21 | 6 | 0         | -6.012070 | -0.693787 | -2.433934 |
| 22 | 6 | 0         | -4.750734 | -1.137736 | -2.736399 |
| 23 | 1 | 0         | -5.735328 | -0.051641 | 0.925780  |
| 24 | 1 | 0         | -4.487961 | -1.428872 | -3.744627 |
| 25 | 1 | 0         | -6.775825 | -0.625738 | -3.196951 |
| 26 | 8 | 0         | -7.670216 | 0.106710  | -1.003661 |
| 27 | 6 | 0         | -8.106009 | 0.524128  | 0.277608  |
| 28 | 1 | 0         | -8.030246 | -0.292319 | 1.000639  |
| 29 | 1 | 0         | -7.523187 | 1.379816  | 0.627925  |
| 30 | 1 | 0         | -9.146387 | 0.813533  | 0.161480  |
| 31 | 6 | 0         | 2.961569  | -0.471673 | 0.451824  |
| 32 | 6 | 0         | 3.493911  | -1.844660 | 0.444059  |
| 33 | 6 | 0         | 1.794872  | -0.238354 | 1.156869  |
| 34 | 6 | 0         | 1.045289  | -1.352229 | 1.805263  |
| 35 | 6 | 0         | 2.806203  | -2.858271 | 1.111419  |
| 36 | 8 | 0         | 1.618825  | -2.635110 | 1.762518  |

Imaginary frequency: none  
 Electronic energy  $E = -4189.702486$  a.u.  
 Enthalpy  $H = -4189.667319$  a.u.  
 Entropy  $S = 224.670$  cal/mol/K  
 Gibbs free energy  $G = -4189.774067$  a.u.  
 Total free energy in solution  $E_{\text{sol}} = -4190.89611$  a.u. 1

|    |    |   |           |           |           |
|----|----|---|-----------|-----------|-----------|
| 37 | 8  | 0 | 3.646180  | 0.425894  | -0.165368 |
| 38 | 6  | 0 | 1.312978  | 1.092064  | 1.363838  |
| 39 | 6  | 0 | 0.254693  | 1.472926  | 2.109131  |
| 40 | 1  | 0 | 0.865267  | -1.123749 | 2.857432  |
| 41 | 1  | 0 | 1.869731  | 1.889876  | 0.888120  |
| 42 | 6  | 0 | -0.094821 | 2.891253  | 2.207540  |
| 43 | 8  | 0 | 0.515850  | 3.820858  | 1.731474  |
| 44 | 1  | 0 | -0.373058 | 0.789361  | 2.660069  |
| 45 | 8  | 0 | -1.242355 | 3.054614  | 2.914731  |
| 46 | 6  | 0 | -1.649596 | 4.418571  | 3.056383  |
| 47 | 1  | 0 | -0.880303 | 4.990810  | 3.572082  |
| 48 | 1  | 0 | -1.824089 | 4.864938  | 2.078947  |
| 49 | 1  | 0 | -2.566027 | 4.394277  | 3.639388  |
| 50 | 6  | 0 | 4.691642  | -2.156949 | -0.204585 |
| 51 | 6  | 0 | 5.187638  | -3.451884 | -0.184328 |
| 52 | 6  | 0 | 4.482535  | -4.451177 | 0.488259  |
| 53 | 6  | 0 | 3.288515  | -4.161542 | 1.137024  |
| 54 | 1  | 0 | 5.215034  | -1.355304 | -0.707602 |
| 55 | 1  | 0 | 6.117636  | -3.684656 | -0.684975 |
| 56 | 1  | 0 | 4.865096  | -5.463533 | 0.510173  |
| 57 | 1  | 0 | 2.726539  | -4.918504 | 1.667167  |
| 58 | 30 | 0 | 3.125088  | 1.778598  | -1.398781 |
| 59 | 17 | 0 | 4.644206  | 3.201973  | -1.991215 |
| 60 | 17 | 0 | 1.081858  | 1.477403  | -2.194901 |

**cis-exo-TS2-IV**

Standard orientation:

| Center Number | Atomic Number | Atomic Type | Coordinates (Angstroms) |           |           |
|---------------|---------------|-------------|-------------------------|-----------|-----------|
|               |               |             | X                       | Y         | Z         |
| 1             | 6             | 0           | -2.074173               | 0.652169  | 0.619372  |
| 2             | 7             | 0           | -0.209606               | 1.964167  | -0.080050 |
| 3             | 6             | 0           | -0.639992               | 0.819742  | 0.523788  |
| 4             | 6             | 0           | 0.206055                | 0.170826  | 1.584045  |
| 5             | 6             | 0           | -2.987899               | 1.322869  | -0.158605 |
| 6             | 6             | 0           | -1.220973               | 2.968008  | -0.475037 |
| 7             | 6             | 0           | -2.504617               | 2.393995  | -1.082865 |
| 8             | 1             | 0           | 0.097150                | -0.914021 | 1.594176  |
| 9             | 1             | 0           | -0.130380               | 0.583641  | 2.541148  |
| 10            | 1             | 0           | 1.258569                | 0.410143  | 1.481603  |
| 11            | 6             | 0           | -4.261475               | 0.736024  | 0.099921  |
| 12            | 6             | 0           | -4.044355               | -0.290394 | 1.057577  |
| 13            | 7             | 0           | -2.703864               | -0.317786 | 1.365752  |
| 14            | 1             | 0           | -2.242031               | -1.013229 | 1.927178  |
| 15            | 1             | 0           | -0.727098               | 3.667419  | -1.147107 |
| 16            | 1             | 0           | -1.484892               | 3.513126  | 0.433026  |
| 17            | 1             | 0           | -2.334426               | 1.992835  | -2.088546 |
| 18            | 1             | 0           | -3.232654               | 3.201818  | -1.182915 |
| 19            | 6             | 0           | -5.555379               | 0.975101  | -0.381408 |
| 20            | 6             | 0           | -6.596787               | 0.193308  | 0.088235  |
| 21            | 6             | 0           | -6.366605               | -0.826350 | 1.040710  |
| 22            | 6             | 0           | -5.096520               | -1.071551 | 1.534222  |
| 23            | 1             | 0           | -5.765190               | 1.746698  | -1.110131 |
| 24            | 1             | 0           | -4.933404               | -1.851603 | 2.266878  |
| 25            | 1             | 0           | -7.186989               | -1.429632 | 1.400550  |
| 26            | 8             | 0           | -7.829357               | 0.472950  | -0.423621 |
| 27            | 6             | 0           | -8.929796               | -0.282005 | 0.045711  |
| 28            | 1             | 0           | -8.814321               | -1.342952 | -0.191554 |
| 29            | 1             | 0           | -9.063676               | -0.160863 | 1.123913  |
| 30            | 1             | 0           | -9.801521               | 0.109211  | -0.471858 |

Imaginary frequency: -247.4276 cm<sup>-1</sup>  
 Electronic energy  $E = -4189.684557$  a.u.  
 Enthalpy  $H = -4189.650471$  a.u.  
 Entropy  $S = 215.552$  cal/mol/K  
 Gibbs free energy  $G = -4189.752887$  a.u.  
 Total free energy in solution  $E_{\text{sol}} = -4190.87034$  a.u.

|    |    |   |           |           |           |
|----|----|---|-----------|-----------|-----------|
| 31 | 6  | 0 | 3.100414  | 0.680763  | -0.542836 |
| 32 | 6  | 0 | 3.627471  | 1.971162  | -0.096418 |
| 33 | 6  | 0 | 1.751063  | 0.655000  | -0.981177 |
| 34 | 6  | 0 | 0.954822  | 1.912434  | -1.050904 |
| 35 | 6  | 0 | 2.867522  | 3.128617  | -0.284043 |
| 36 | 8  | 0 | 1.678420  | 3.112618  | -0.950748 |
| 37 | 8  | 0 | 3.842938  | -0.337225 | -0.491309 |
| 38 | 6  | 0 | 1.041416  | -0.537751 | -1.032338 |
| 39 | 6  | 0 | -0.335729 | -0.573897 | -1.216507 |
| 40 | 1  | 0 | 0.461621  | 1.975038  | -2.024649 |
| 41 | 1  | 0 | 1.530154  | -1.448535 | -0.705194 |
| 42 | 6  | 0 | -1.090058 | -1.792411 | -0.909589 |
| 43 | 8  | 0 | -0.709612 | -2.679861 | -0.173261 |
| 44 | 1  | 0 | -0.842229 | 0.152879  | -1.835779 |
| 45 | 8  | 0 | -2.309441 | -1.766010 | -1.475028 |
| 46 | 6  | 0 | -3.150988 | -2.876701 | -1.146046 |
| 47 | 1  | 0 | -2.747021 | -3.791441 | -1.576586 |
| 48 | 1  | 0 | -3.220296 | -2.989874 | -0.065885 |
| 49 | 1  | 0 | -4.123272 | -2.641235 | -1.568071 |
| 50 | 6  | 0 | 4.875568  | 2.065793  | 0.530644  |
| 51 | 6  | 0 | 5.350862  | 3.291559  | 0.961375  |
| 52 | 6  | 0 | 4.578566  | 4.439562  | 0.760221  |
| 53 | 6  | 0 | 3.340723  | 4.366969  | 0.137633  |
| 54 | 1  | 0 | 5.448854  | 1.158529  | 0.662920  |
| 55 | 1  | 0 | 6.313715  | 3.362124  | 1.448445  |
| 56 | 1  | 0 | 4.946790  | 5.401455  | 1.093284  |
| 57 | 1  | 0 | 2.732708  | 5.244706  | -0.033166 |
| 58 | 30 | 0 | 3.841573  | -2.168536 | 0.130112  |
| 59 | 17 | 0 | 4.959107  | -3.552824 | -1.089368 |
| 60 | 17 | 0 | 2.722572  | -2.257860 | 2.000113  |

**cis-exo-IM2-IV**

Standard orientation:

| Center Number | Atomic Number | Atomic Type | Coordinates (Angstroms) |           |           |
|---------------|---------------|-------------|-------------------------|-----------|-----------|
|               |               |             | X                       | Y         | Z         |
| 6             | 0             | -2.271246   | -0.428639               | 0.603285  |           |
| 2             | 7             | 0           | -0.248213               | 0.739774  | 1.301244  |
| 3             | 6             | 0           | -0.820464               | -0.596782 | 0.992208  |
| 4             | 6             | 0           | -0.650319               | -1.464484 | 2.249051  |
| 5             | 6             | 0           | -3.000080               | 0.727044  | 0.695904  |
| 6             | 6             | 0           | -1.179421               | 1.587788  | 2.067842  |
| 7             | 6             | 0           | -2.438409               | 1.979010  | 1.289447  |
| 8             | 1             | 0           | -1.152488               | -2.425558 | 2.127253  |
| 9             | 1             | 0           | -1.096167               | -0.972340 | 3.110645  |
| 10            | 1             | 0           | 0.411536                | -1.621636 | 2.442935  |
| 11            | 6             | 0           | -4.312029               | 0.434222  | 0.188391  |
| 12            | 6             | 0           | -4.305678               | -0.929223 | -0.191160 |
| 13            | 7             | 0           | -3.049145               | -1.434196 | 0.074875  |
| 14            | 1             | 0           | -2.724221               | -2.367336 | -0.115640 |
| 15            | 1             | 0           | -0.627033               | 2.459447  | 2.406307  |
| 16            | 1             | 0           | -1.469508               | 1.022699  | 2.952362  |
| 17            | 1             | 0           | -2.203693               | 2.726081  | 0.523369  |
| 18            | 1             | 0           | -3.155983               | 2.444404  | 1.970827  |
| 19            | 6             | 0           | -5.474258               | 1.192484  | 0.026037  |
| 20            | 6             | 0           | -6.600685               | 0.585230  | -0.510353 |
| 21            | 6             | 0           | -6.582543               | -0.772709 | -0.885970 |
| 22            | 6             | 0           | -5.435732               | -1.538480 | -0.727768 |

Imaginary frequency: none  
 Electronic energy  $E = -4189.710157$  a.u.  
 Enthalpy  $H = -4189.676195$  a.u.  
 Entropy  $S = 215.741$  cal/mol/K  
 Gibbs free energy  $G = -4189.778700$  a.u.  
 Total free energy in solution  $E_{\text{sol}} = -4190.89435$  a.u. 1

|    |    |   |           |           |           |
|----|----|---|-----------|-----------|-----------|
| 23 | 1  | 0 | -5.524307 | 2.237710  | 0.302352  |
| 24 | 1  | 0 | -5.431584 | -2.581651 | -1.018291 |
| 25 | 1  | 0 | -7.464027 | -1.237066 | -1.302633 |
| 26 | 8  | 0 | -7.700650 | 1.387496  | -0.643168 |
| 27 | 6  | 0 | -8.865866 | 0.815150  | -1.199585 |
| 28 | 1  | 0 | -8.686188 | 0.455046  | -2.216546 |
| 29 | 1  | 0 | -9.238549 | -0.008537 | -0.584121 |
| 30 | 1  | 0 | -9.607696 | 1.609441  | -1.224805 |
| 31 | 6  | 0 | 2.761988  | 1.245488  | -0.636908 |
| 32 | 6  | 0 | 2.782541  | 2.691728  | -0.610885 |
| 33 | 6  | 0 | 1.474113  | 0.616659  | -0.345807 |
| 34 | 6  | 0 | 0.299258  | 1.421237  | 0.138556  |
| 35 | 6  | 0 | 1.706632  | 3.370078  | -0.017522 |
| 36 | 8  | 0 | 0.644931  | 2.745130  | 0.538304  |
| 37 | 8  | 0 | 3.780564  | 0.580231  | -0.898071 |
| 38 | 6  | 0 | 1.279871  | -0.690708 | -0.510371 |
| 39 | 6  | 0 | -0.056825 | -1.285009 | -0.222628 |
| 40 | 1  | 0 | -0.439269 | 1.533074  | -0.671902 |
| 41 | 1  | 0 | 2.032156  | -1.345228 | -0.934564 |
| 42 | 6  | 0 | 0.139507  | -2.778952 | -0.013541 |
| 43 | 8  | 0 | 1.187793  | -3.286875 | 0.284301  |
| 44 | 1  | 0 | -0.682177 | -1.155322 | -1.113807 |
| 45 | 8  | 0 | -0.989381 | -3.484232 | -0.211584 |
| 46 | 6  | 0 | -0.846971 | -4.903753 | 0.003561  |
| 47 | 1  | 0 | -0.093930 | -5.301263 | -0.671987 |
| 48 | 1  | 0 | -0.547459 | -5.090140 | 1.032607  |
| 49 | 1  | 0 | -1.823718 | -5.328364 | -0.203558 |
| 50 | 6  | 0 | 3.886667  | 3.413347  | -1.092752 |
| 51 | 6  | 0 | 3.908543  | 4.789466  | -1.007803 |
| 52 | 6  | 0 | 2.826616  | 5.455873  | -0.414593 |
| 53 | 6  | 0 | 1.736417  | 4.761886  | 0.081882  |
| 54 | 1  | 0 | 4.705117  | 2.856662  | -1.529360 |
| 55 | 1  | 0 | 4.751744  | 5.349601  | -1.387214 |
| 56 | 1  | 0 | 2.840464  | 6.535755  | -0.338772 |
| 57 | 1  | 0 | 0.902220  | 5.265716  | 0.549843  |
| 58 | 30 | 0 | 4.207926  | -1.255681 | -0.224148 |
| 59 | 17 | 0 | 4.335094  | -2.640778 | -1.881119 |
| 60 | 17 | 0 | 4.371536  | -1.138724 | 1.924468  |

**cis-COM-V**

Standard orientation:

| Center Number | Atomic Number | Atomic Type | Coordinates (Angstroms) |           |           |
|---------------|---------------|-------------|-------------------------|-----------|-----------|
|               |               |             | X                       | Y         | Z         |
| 6             | 0             | -1.583419   | -1.307477               | -0.252127 |           |
| 2             | 6             | 0           | -2.951906               | -0.758461 | -0.265268 |
| 3             | 6             | 0           | -0.563012               | -0.391841 | -0.809635 |
| 4             | 6             | 0           | -0.949928               | 0.790175  | -1.367529 |
| 5             | 6             | 0           | -3.206348               | 0.484722  | -0.837377 |
| 6             | 8             | 0           | -2.196760               | 1.234477  | -1.404649 |
| 7             | 8             | 0           | -1.311118               | -2.414448 | 0.170378  |
| 8             | 6             | 0           | 0.820350                | -0.850316 | -0.775519 |
| 9             | 6             | 0           | 1.937934                | -0.156139 | -1.103385 |
| 10            | 1             | 0           | -0.269845               | 1.490904  | -1.831399 |
| 11            | 1             | 0           | 0.949626                | -1.855802 | -0.381854 |
| 12            | 6             | 0           | 3.255896                | -0.842674 | -0.984937 |
| 13            | 8             | 0           | 3.410639                | -1.971616 | -0.590380 |
| 14            | 1             | 0           | 1.936852                | 0.833031  | -1.546214 |
| 15            | 8             | 0           | 4.244161                | -0.028945 | -1.368474 |
| 16            | 6             | 0           | 5.558158                | -0.603956 | -1.276711 |

Imaginary frequency: none  
 Electronic energy  $E = -3501.466988$  a.u.  
 Enthalpy  $H = -3501.445926$  a.u.  
 Entropy  $S = 156.386$  cal/mol/K  
 Gibbs free energy  $G = -3501.520230$  a.u.  
 Total free energy in solution  $E_{\text{sol}} = -3502.20823$  a.u. 1

|    |    |   |           |           |           |
|----|----|---|-----------|-----------|-----------|
| 17 | 1  | 0 | 5.766432  | -0.886774 | -0.246961 |
| 18 | 1  | 0 | 5.622011  | -1.484453 | -1.912783 |
| 19 | 1  | 0 | 6.237816  | 0.171454  | -1.613514 |
| 20 | 6  | 0 | -4.018276 | -1.474815 | 0.287670  |
| 21 | 6  | 0 | -5.295864 | -0.944977 | 0.264229  |
| 22 | 6  | 0 | -5.524315 | 0.307955  | -0.318486 |
| 23 | 6  | 0 | -4.482869 | 1.033354  | -0.874849 |
| 24 | 1  | 0 | -3.802070 | -2.438536 | 0.729282  |
| 25 | 1  | 0 | -6.120062 | -1.495975 | 0.696596  |
| 26 | 1  | 0 | -6.524720 | 0.719838  | -0.335039 |
| 27 | 1  | 0 | -4.631393 | 2.003094  | -1.329222 |
| 28 | 30 | 0 | 1.144224  | 0.675617  | 0.991442  |
| 29 | 17 | 0 | 1.044329  | 2.775642  | 0.463715  |
| 30 | 17 | 0 | 1.035366  | -0.634133 | 2.680779  |

**cis-endo-TS1-V**

Standard orientation:

Imaginary frequency: -171.0069 cm<sup>-1</sup>

Electronic energy  $E = -4189.678900$  a.u.

Enthalpy  $H = -4189.643782$  a.u.

Entropy  $S = 218.369$  cal/mol/K

Gibbs free energy  $G = -4189.747536$  a.u.

Total free energy in solution  $E_{\text{sol}} = -4190.86312$  a.u. 1

| Center Number | Atomic Number | Atomic Type | Coordinates (Angstroms) |           |           |
|---------------|---------------|-------------|-------------------------|-----------|-----------|
|               |               |             | X                       | Y         | Z         |
| 6             | 0             | -1.908718   | -1.289550               | 1.496142  |           |
| 2             | 7             | 0           | 0.396880                | -1.688228 | 1.094549  |
| 3             | 6             | 0           | -0.519945               | -1.274226 | 1.902854  |
| 4             | 6             | 0           | -0.152754               | -0.714798 | 3.250277  |
| 5             | 6             | 0           | -2.287093               | -1.474892 | 0.184823  |
| 6             | 6             | 0           | -0.011928               | -2.367366 | -0.142992 |
| 7             | 6             | 0           | -1.265770               | -1.820546 | -0.847642 |
| 8             | 1             | 0           | -0.272453               | 0.371957  | 3.280583  |
| 9             | 1             | 0           | 0.871479                | -0.973416 | 3.509788  |
| 10            | 1             | 0           | -0.807717               | -1.144659 | 4.011788  |
| 11            | 6             | 0           | -3.667463               | -1.136629 | 0.100846  |
| 12            | 6             | 0           | -4.075611               | -0.773220 | 1.405506  |
| 13            | 7             | 0           | -2.991773               | -0.873987 | 2.241134  |
| 14            | 1             | 0           | -2.985457               | -0.632223 | 3.215763  |
| 15            | 1             | 0           | -0.196594               | -3.406712 | 0.144394  |
| 16            | 1             | 0           | 0.838981                | -2.361318 | -0.822524 |
| 17            | 1             | 0           | -1.630267               | -2.597344 | -1.523537 |
| 18            | 1             | 0           | -1.051844               | -0.941987 | -1.461947 |
| 19            | 6             | 0           | -4.582326               | -1.090140 | -0.972006 |
| 20            | 6             | 0           | -5.876094               | -0.690424 | -0.701302 |
| 21            | 6             | 0           | -6.274371               | -0.343136 | 0.616497  |
| 22            | 6             | 0           | -5.395441               | -0.380651 | 1.673351  |
| 23            | 8             | 0           | -6.865780               | -0.590762 | -1.628348 |
| 24            | 6             | 0           | -6.516368               | -0.869465 | -2.972065 |
| 25            | 1             | 0           | -4.257111               | -1.350777 | -1.968540 |
| 26            | 1             | 0           | -7.303493               | -0.041717 | 0.758105  |
| 27            | 1             | 0           | -5.714938               | -0.106938 | 2.670585  |
| 28            | 1             | 0           | -6.187739               | -1.906022 | -3.084765 |
| 29            | 1             | 0           | -7.417820               | -0.708201 | -3.556584 |
| 30            | 1             | 0           | -5.727210               | -0.196655 | -3.317475 |
| 31            | 6             | 0           | 2.676904                | -0.610271 | -1.403594 |
| 32            | 6             | 0           | 3.704298                | -1.572144 | -0.941682 |
| 33            | 6             | 0           | 1.925923                | 0.039427  | -0.321673 |
| 34            | 6             | 0           | 2.026081                | -0.489967 | 0.990873  |
| 35            | 6             | 0           | 3.846056                | -1.857363 | 0.413097  |
| 36            | 8             | 0           | 3.057589                | -1.249310 | 1.368647  |
| 37            | 8             | 0           | 2.468599                | -0.401301 | -2.587199 |
| 38            | 6             | 0           | 0.718304                | 0.754097  | -0.717244 |
| 39            | 6             | 0           | -0.196305               | 1.328498  | 0.095684  |
| 40            | 1             | 0           | 1.655284                | 0.081342  | 1.824787  |

|    |    |   |           |           |           |
|----|----|---|-----------|-----------|-----------|
| 41 | 1  | 0 | 0.545520  | 0.784575  | -1.789988 |
| 42 | 6  | 0 | -1.488502 | 1.759312  | -0.479153 |
| 43 | 8  | 0 | -1.810732 | 1.638642  | -1.639909 |
| 44 | 1  | 0 | -0.088135 | 1.408077  | 1.168897  |
| 45 | 8  | 0 | -2.297798 | 2.245348  | 0.473402  |
| 46 | 6  | 0 | -3.607323 | 2.608928  | 0.012551  |
| 47 | 1  | 0 | -3.532556 | 3.391188  | -0.740386 |
| 48 | 1  | 0 | -4.106128 | 1.739551  | -0.412351 |
| 49 | 1  | 0 | -4.135816 | 2.966109  | 0.890979  |
| 50 | 6  | 0 | 4.538376  | -2.218612 | -1.857042 |
| 51 | 6  | 0 | 5.494725  | -3.117821 | -1.415728 |
| 52 | 6  | 0 | 5.622523  | -3.382060 | -0.048394 |
| 53 | 6  | 0 | 4.799385  | -2.755343 | 0.876246  |
| 54 | 1  | 0 | 4.409303  | -1.981861 | -2.904858 |
| 55 | 1  | 0 | 6.144910  | -3.612066 | -2.124920 |
| 56 | 1  | 0 | 6.371231  | -4.082410 | 0.298361  |
| 57 | 1  | 0 | 4.879032  | -2.942010 | 1.938280  |
| 58 | 30 | 0 | 2.412167  | 2.214731  | 0.007483  |
| 59 | 17 | 0 | 2.315136  | 2.624577  | 2.163856  |
| 60 | 17 | 0 | 3.209826  | 3.200503  | -1.732139 |

**cis-endo-IM1-V**

Standard orientation:

Center Atomic Atomic Coordinates (Angstroms)  
Number Number Type X Y Z

|    |   |          |           |           |           |
|----|---|----------|-----------|-----------|-----------|
| 6  | 0 | 1.949445 | 0.817898  | 1.656318  |           |
| 2  | 7 | 0        | -0.330479 | 1.097779  | 1.178603  |
| 3  | 6 | 0        | 0.579615  | 0.586067  | 1.975632  |
| 4  | 6 | 0        | 0.198243  | -0.265534 | 3.151933  |
| 5  | 6 | 0        | 2.347802  | 1.242258  | 0.394366  |
| 6  | 6 | 0        | 0.074708  | 2.114686  | 0.188178  |
| 7  | 6 | 0        | 1.340260  | 1.736536  | -0.585946 |
| 8  | 1 | 0        | 0.042238  | -1.308322 | 2.863829  |
| 9  | 1 | 0        | -0.720959 | 0.098990  | 3.607297  |
| 10 | 1 | 0        | 0.987395  | -0.231051 | 3.901259  |
| 11 | 6 | 0        | 3.730139  | 0.964278  | 0.280132  |
| 12 | 6 | 0        | 4.133388  | 0.398038  | 1.513680  |
| 13 | 7 | 0        | 3.045222  | 0.319384  | 2.336619  |
| 14 | 1 | 0        | 3.045281  | -0.088267 | 3.254144  |
| 15 | 1 | 0        | 0.264515  | 3.028975  | 0.755148  |
| 16 | 1 | 0        | -0.766139 | 2.289105  | -0.475646 |
| 17 | 1 | 0        | 1.692117  | 2.635634  | -1.096193 |
| 18 | 1 | 0        | 1.164929  | 0.973526  | -1.348653 |
| 19 | 6 | 0        | 4.654217  | 1.121445  | -0.778220 |
| 20 | 6 | 0        | 5.952267  | 0.714595  | -0.559947 |
| 21 | 6 | 0        | 6.347203  | 0.165648  | 0.693951  |
| 22 | 6 | 0        | 5.464890  | 0.003570  | 1.732032  |
| 23 | 8 | 0        | 6.952711  | 0.783951  | -1.472077 |
| 24 | 6 | 0        | 6.616577  | 1.276286  | -2.758700 |
| 25 | 1 | 0        | 4.326964  | 1.530157  | -1.722828 |
| 26 | 1 | 0        | 7.383391  | -0.128247 | 0.795137  |
| 27 | 1 | 0        | 5.784301  | -0.423996 | 2.673242  |
| 28 | 1 | 0        | 6.263992  | 2.309142  | -2.700196 |
| 29 | 1 | 0        | 7.530614  | 1.235008  | -3.343632 |
| 30 | 1 | 0        | 5.850289  | 0.652288  | -3.225169 |
| 31 | 6 | 0        | -2.518807 | 0.746899  | -1.328539 |
| 32 | 6 | 0        | -3.369887 | 1.817595  | -0.749334 |
| 33 | 6 | 0        | -1.833403 | -0.119341 | -0.357874 |
| 34 | 6 | 0        | -1.667431 | 0.414617  | 1.047488  |

Imaginary frequency: none  
 Electronic energy  $E = -4189.689428$  a.u.  
 Enthalpy  $H = -4189.654397$  a.u.  
 Entropy  $S = 220.689$  cal/mol/K  
 Gibbs free energy  $G = -4189.759254$  a.u.  
 Total free energy in solution  $E_{\text{sol}} = -4190.88243$  a.u. 1

|    |    |   |           |           |           |
|----|----|---|-----------|-----------|-----------|
| 35 | 6  | 0 | -3.397165 | 2.034625  | 0.626685  |
| 36 | 8  | 0 | -2.681506 | 1.265607  | 1.510297  |
| 37 | 8  | 0 | -2.407204 | 0.616451  | -2.539014 |
| 38 | 6  | 0 | -0.666998 | -0.800277 | -0.917350 |
| 39 | 6  | 0 | 0.260139  | -1.532346 | -0.262924 |
| 40 | 1  | 0 | -1.633349 | -0.399597 | 1.759423  |
| 41 | 1  | 0 | -0.514460 | -0.625290 | -1.979865 |
| 42 | 6  | 0 | 1.539097  | -1.816294 | -0.925799 |
| 43 | 8  | 0 | 1.880761  | -1.410608 | -2.018690 |
| 44 | 1  | 0 | 0.144909  | -1.877020 | 0.755040  |
| 45 | 8  | 0 | 2.359529  | -2.525243 | -0.124233 |
| 46 | 6  | 0 | 3.658399  | -2.770170 | -0.672974 |
| 47 | 1  | 0 | 3.575821  | -3.338649 | -1.597493 |
| 48 | 1  | 0 | 4.164401  | -1.827064 | -0.876379 |
| 49 | 1  | 0 | 4.193077  | -3.339425 | 0.081890  |
| 50 | 6  | 0 | -4.136527 | 2.634850  | -1.582931 |
| 51 | 6  | 0 | -4.925037 | 3.641619  | -1.049462 |
| 52 | 6  | 0 | -4.946360 | 3.837806  | 0.333597  |
| 53 | 6  | 0 | -4.185097 | 3.040391  | 1.177417  |
| 54 | 1  | 0 | -4.092975 | 2.439543  | -2.646275 |
| 55 | 1  | 0 | -5.524562 | 4.267160  | -1.696984 |
| 56 | 1  | 0 | -5.562968 | 4.619371  | 0.759072  |
| 57 | 1  | 0 | -4.189569 | 3.174800  | 2.250535  |
| 58 | 30 | 0 | -2.965171 | -1.880150 | -0.157064 |
| 59 | 17 | 0 | -2.430553 | -2.758789 | 1.822892  |
| 60 | 17 | 0 | -4.362958 | -2.597572 | -1.642897 |

### cis-endo-TS2-V

Standard orientation:

| Center Number | Atomic Number | Atomic Type | Coordinates (Angstroms) |           |           |
|---------------|---------------|-------------|-------------------------|-----------|-----------|
|               |               |             | X                       | Y         | Z         |
| 6             | 0             | -1.968950   | -0.088027               | -1.299221 |           |
| 2             | 7             | 0           | 0.269595                | 0.652991  | -1.642344 |
| 3             | 6             | 0           | -0.601347               | -0.410001 | -1.684745 |
| 4             | 6             | 0           | -0.425588               | -1.411817 | -2.808887 |
| 5             | 6             | 0           | -2.310503               | 0.947744  | -0.465921 |
| 6             | 6             | 0           | -0.207441               | 1.963341  | -1.140813 |
| 7             | 6             | 0           | -1.244075               | 1.892454  | -0.014402 |
| 8             | 1             | 0           | -0.945354               | -2.340824 | -2.575933 |
| 9             | 1             | 0           | 0.619721                | -1.649804 | -2.997438 |
| 10            | 1             | 0           | -0.844102               | -0.972943 | -3.717838 |
| 11            | 6             | 0           | -3.707644               | 0.830877  | -0.206296 |
| 12            | 6             | 0           | -4.154395               | -0.307978 | -0.914968 |
| 13            | 7             | 0           | -3.077029               | -0.857709 | -1.570753 |
| 14            | 1             | 0           | -3.093202               | -1.690273 | -2.132213 |
| 15            | 1             | 0           | -0.664051               | 2.467312  | -1.994908 |
| 16            | 1             | 0           | 0.664876                | 2.542311  | -0.847103 |
| 17            | 1             | 0           | -1.639478               | 2.897498  | 0.147260  |
| 18            | 1             | 0           | -0.798514               | 1.565497  | 0.931025  |
| 19            | 6             | 0           | -4.616880               | 1.589589  | 0.557913  |
| 20            | 6             | 0           | -5.936938               | 1.183570  | 0.586931  |
| 21            | 6             | 0           | -6.369307               | 0.042367  | -0.133515 |
| 22            | 6             | 0           | -5.496492               | -0.708318 | -0.886957 |
| 23            | 8             | 0           | -6.924797               | 1.811667  | 1.282411  |
| 24            | 6             | 0           | -6.556525               | 2.947684  | 2.040129  |

Imaginary frequency: -313.0444 cm<sup>-1</sup>  
 Electronic energy  $E = -4189.678521$  a.u.  
 Enthalpy  $H = -4189.644605$  a.u.  
 Entropy  $S = 211.708$  cal/mol/K  
 Gibbs free energy  $G = -4189.745194$  a.u.  
 Total free energy in solution  $E_{\text{sol}} = -4190.86184$  a.u. 1



|    |    |   |           |           |           |
|----|----|---|-----------|-----------|-----------|
| 25 | 1  | 0 | -4.271949 | 2.455012  | 1.105143  |
| 26 | 1  | 0 | -7.417020 | -0.217816 | -0.067535 |
| 27 | 1  | 0 | -5.840734 | -1.576365 | -1.435109 |
| 28 | 1  | 0 | -6.157228 | 3.736546  | 1.396623  |
| 29 | 1  | 0 | -7.466019 | 3.296773  | 2.521357  |
| 30 | 1  | 0 | -5.815088 | 2.688315  | 2.800613  |
| 31 | 6  | 0 | 2.181932  | 1.226752  | 1.043311  |
| 32 | 6  | 0 | 3.041716  | 2.201798  | 0.350153  |
| 33 | 6  | 0 | 1.699975  | 0.112659  | 0.183150  |
| 34 | 6  | 0 | 1.666219  | 0.289999  | -1.317714 |
| 35 | 6  | 0 | 3.202080  | 2.141070  | -1.037217 |
| 36 | 8  | 0 | 2.555016  | 1.245379  | -1.839869 |
| 37 | 8  | 0 | 1.895953  | 1.306413  | 2.223656  |
| 38 | 6  | 0 | 0.733940  | -0.736779 | 0.710252  |
| 39 | 6  | 0 | 0.024088  | -1.647382 | -0.104402 |
| 40 | 1  | 0 | 1.885859  | -0.636592 | -1.836247 |
| 41 | 1  | 0 | 0.414738  | -0.569130 | 1.736613  |
| 42 | 6  | 0 | -1.185424 | -2.243058 | 0.496594  |
| 43 | 8  | 0 | -1.736641 | -1.823233 | 1.486708  |
| 44 | 1  | 0 | 0.568821  | -2.260174 | -0.811375 |
| 45 | 8  | 0 | -1.654010 | -3.274483 | -0.235029 |
| 46 | 6  | 0 | -2.866339 | -3.847261 | 0.278440  |
| 47 | 1  | 0 | -2.697228 | -4.241631 | 1.278106  |
| 48 | 1  | 0 | -3.647707 | -3.089189 | 0.322476  |
| 49 | 1  | 0 | -3.127014 | -4.645634 | -0.409995 |
| 50 | 6  | 0 | 3.724102  | 3.180537  | 1.081980  |
| 51 | 6  | 0 | 4.562013  | 4.076405  | 0.443854  |
| 52 | 6  | 0 | 4.719004  | 3.997231  | -0.944126 |
| 53 | 6  | 0 | 4.044917  | 3.040577  | -1.687487 |
| 54 | 1  | 0 | 3.576342  | 3.194441  | 2.153869  |
| 55 | 1  | 0 | 5.096205  | 4.826442  | 1.010779  |
| 56 | 1  | 0 | 5.375908  | 4.691839  | -1.452081 |
| 57 | 1  | 0 | 4.152373  | 2.968749  | -2.761098 |
| 58 | 30 | 0 | 2.949773  | -1.672271 | 0.715496  |
| 59 | 17 | 0 | 3.265877  | -2.754597 | -1.160432 |
| 60 | 17 | 0 | 3.700694  | -1.807129 | 2.722937  |

**cis-endo-IM2-V**

Standard orientation:

Imaginary frequency: none

Electronic energy  $E = -4189.722061$  a.u.

Enthalpy  $H = -4189.688125$  a.u.

Entropy  $S = 215.427$  cal/mol/K

Gibbs free energy  $G = -4189.790481$  a.u.

Total free energy in solution  $E_{\text{sol}} = -4190.90114$  a.u. 1

| Center Number | Atomic Number | Atomic Type | Coordinates (Angstroms) |           |           |
|---------------|---------------|-------------|-------------------------|-----------|-----------|
|               |               |             | X                       | Y         | Z         |
| 6             | 0             | 1.368145    | -1.379482               | 0.535241  |           |
| 2             | 7             | 0           | -0.176410               | -0.355395 | 2.061734  |
| 3             | 6             | 0           | 0.064218                | -1.583808 | 1.262834  |
| 4             | 6             | 0           | 0.182788                | -2.784508 | 2.213862  |
| 5             | 6             | 0           | 2.412211                | -0.740087 | 1.151270  |
| 6             | 6             | 0           | 0.866325                | -0.119032 | 3.069191  |
| 7             | 6             | 0           | 2.322854                | -0.118777 | 2.513956  |
| 8             | 1             | 0           | 0.245058                | -3.704101 | 1.631745  |
| 9             | 1             | 0           | -0.690150               | -2.837573 | 2.867695  |
| 10            | 1             | 0           | 1.089419                | -2.721453 | 2.811768  |
| 11            | 6             | 0           | 3.491682                | -0.723016 | 0.210910  |
| 12            | 6             | 0           | 3.028292                | -1.377282 | -0.951144 |
| 13            | 7             | 0           | 1.729376                | -1.778001 | -0.726552 |
| 14            | 1             | 0           | 1.112492                | -2.224729 | -1.388117 |
| 15            | 1             | 0           | 0.754915                | -0.873865 | 3.844552  |
| 16            | 1             | 0           | 0.645647                | 0.842423  | 3.533739  |
| 17            | 1             | 0           | 2.963610                | -0.647305 | 3.226767  |
| 18            | 1             | 0           | 2.694046                | 0.907165  | 2.457077  |

|    |    |   |           |           |           |
|----|----|---|-----------|-----------|-----------|
| 19 | 6  | 0 | 4.800545  | -0.205753 | 0.253585  |
| 20 | 6  | 0 | 5.599518  | -0.360550 | -0.865470 |
| 21 | 6  | 0 | 5.121402  | -1.017828 | -2.021672 |
| 22 | 6  | 0 | 3.842636  | -1.529550 | -2.078193 |
| 23 | 8  | 0 | 6.887580  | 0.088207  | -0.962638 |
| 24 | 6  | 0 | 7.421692  | 0.745556  | 0.165920  |
| 25 | 1  | 0 | 5.156608  | 0.289547  | 1.145889  |
| 26 | 1  | 0 | 5.797547  | -1.106656 | -2.861142 |
| 27 | 1  | 0 | 3.485770  | -2.031651 | -2.968537 |
| 28 | 1  | 0 | 7.437217  | 0.085473  | 1.037987  |
| 29 | 1  | 0 | 8.439316  | 1.022900  | -0.097326 |
| 30 | 1  | 0 | 6.848891  | 1.645911  | 0.407095  |
| 31 | 6  | 0 | -1.591876 | 1.829598  | -0.676793 |
| 32 | 6  | 0 | -0.639430 | 2.902074  | -0.585150 |
| 33 | 6  | 0 | -1.267523 | 0.611865  | 0.089527  |
| 34 | 6  | 0 | -0.519826 | 0.836235  | 1.364388  |
| 35 | 6  | 0 | 0.489937  | 2.719395  | 0.238869  |
| 36 | 8  | 0 | 0.674296  | 1.628813  | 1.000406  |
| 37 | 8  | 0 | -2.635031 | 1.860803  | -1.361436 |
| 38 | 6  | 0 | -1.509994 | -0.597386 | -0.424180 |
| 39 | 6  | 0 | -1.208526 | -1.805916 | 0.401346  |
| 40 | 1  | 0 | -1.089788 | 1.487701  | 2.034266  |
| 41 | 1  | 0 | -1.917649 | -0.719002 | -1.421827 |
| 42 | 6  | 0 | -1.180482 | -3.045674 | -0.470113 |
| 43 | 8  | 0 | -0.663828 | -3.101583 | -1.566314 |
| 44 | 1  | 0 | -2.021869 | -1.937799 | 1.121828  |
| 45 | 8  | 0 | -1.818395 | -4.064018 | 0.092612  |
| 46 | 6  | 0 | -1.878390 | -5.262147 | -0.704172 |
| 47 | 1  | 0 | -2.397392 | -5.052704 | -1.636444 |
| 48 | 1  | 0 | -0.872007 | -5.617205 | -0.915491 |
| 49 | 1  | 0 | -2.428899 | -5.977971 | -0.103670 |
| 50 | 6  | 0 | -0.788610 | 4.082778  | -1.335870 |
| 51 | 6  | 0 | 0.186217  | 5.053583  | -1.294224 |
| 52 | 6  | 0 | 1.324315  | 4.848666  | -0.495592 |
| 53 | 6  | 0 | 1.481467  | 3.705265  | 0.265840  |
| 54 | 1  | 0 | -1.675455 | 4.189071  | -1.946588 |
| 55 | 1  | 0 | 0.083466  | 5.962502  | -1.870282 |
| 56 | 1  | 0 | 2.096417  | 5.607318  | -0.466590 |
| 57 | 1  | 0 | 2.350720  | 3.547283  | 0.889036  |
| 58 | 30 | 0 | -3.921948 | 0.619266  | -0.387076 |
| 59 | 17 | 0 | -4.704598 | -1.105580 | -1.450149 |
| 60 | 17 | 0 | -4.200974 | 1.506604  | 1.585829  |

-----  
**cis-exo-TS1-V**

Standard orientation:

| Center Number | Atomic Number | Atomic Type | Coordinates (Angstroms) |           |           |
|---------------|---------------|-------------|-------------------------|-----------|-----------|
|               |               |             | X                       | Y         | Z         |
| 1             | 6             | 0           | -1.817703               | -1.716081 | -0.553572 |
| 2             | 7             | 0           | 0.308583                | -1.871621 | 0.480297  |
| 3             | 6             | 0           | -0.374922               | -1.797009 | -0.618214 |
| 4             | 6             | 0           | 0.279780                | -1.796336 | -1.965166 |
| 5             | 6             | 0           | -2.485240               | -1.383141 | 0.605747  |
| 6             | 6             | 0           | -0.436219               | -2.111302 | 1.725652  |
| 7             | 6             | 0           | -1.718594               | -1.284211 | 1.886213  |
| 8             | 1             | 0           | -0.027509               | -0.926552 | -2.549766 |
| 9             | 1             | 0           | -0.048522               | -2.698322 | -2.492537 |
| 10            | 1             | 0           | 1.361757                | -1.833418 | -1.888164 |
| 11            | 6             | 0           | -3.827434               | -1.083557 | 0.238444  |
| 12            | 6             | 0           | -3.914782               | -1.279152 | -1.160776 |

Imaginary frequency: -166.2868 cm<sup>-1</sup>  
Electronic energy  $E = -4189.676411$  a.u.  
Enthalpy  $H = -4189.641476$  a.u.  
Entropy  $S = 219.250$  cal/mol/K  
Gibbs free energy  $G = -4189.745649$  a.u.  
Total free energy in solution  $E_{\text{sol}} = -4190.86100$  a.u.

|    |    |   |           |           |           |
|----|----|---|-----------|-----------|-----------|
| 13 | 7  | 0 | -2.682914 | -1.666331 | -1.623580 |
| 14 | 1  | 0 | -2.426491 | -1.751200 | -2.591651 |
| 15 | 1  | 0 | 0.249144  | -1.950734 | 2.558305  |
| 16 | 1  | 0 | -0.706970 | -3.170938 | 1.721762  |
| 17 | 1  | 0 | -1.505157 | -0.236052 | 2.125088  |
| 18 | 1  | 0 | -2.282136 | -1.689871 | 2.729042  |
| 19 | 6  | 0 | -4.956263 | -0.650909 | 0.966881  |
| 20 | 6  | 0 | -6.129175 | -0.431840 | 0.272955  |
| 21 | 6  | 0 | -6.203446 | -0.646171 | -1.128547 |
| 22 | 6  | 0 | -5.116872 | -1.072221 | -1.854483 |
| 23 | 1  | 0 | -4.883671 | -0.496416 | 2.033654  |
| 24 | 1  | 0 | -5.188266 | -1.229583 | -2.922936 |
| 25 | 1  | 0 | -7.155793 | -0.461300 | -1.606862 |
| 26 | 8  | 0 | -7.293461 | -0.006955 | 0.832878  |
| 27 | 6  | 0 | -7.289231 | 0.227110  | 2.228732  |
| 28 | 1  | 0 | -7.057034 | -0.688790 | 2.778605  |
| 29 | 1  | 0 | -6.567079 | 1.004124  | 2.493547  |
| 30 | 1  | 0 | -8.292098 | 0.559692  | 2.481268  |
| 31 | 6  | 0 | 3.179957  | -0.286274 | -1.125162 |
| 32 | 6  | 0 | 4.056006  | -1.315259 | -0.517805 |
| 33 | 6  | 0 | 2.078495  | 0.159433  | -0.262623 |
| 34 | 6  | 0 | 1.770277  | -0.620099 | 0.891155  |
| 35 | 6  | 0 | 3.776147  | -1.825854 | 0.746278  |
| 36 | 8  | 0 | 2.693639  | -1.389163 | 1.480214  |
| 37 | 8  | 0 | 3.351692  | 0.121946  | -2.261984 |
| 38 | 6  | 0 | 0.996949  | 0.881180  | -0.922320 |
| 39 | 6  | 0 | -0.180327 | 1.241832  | -0.367392 |
| 40 | 1  | 0 | 1.112977  | -0.200506 | 1.638828  |
| 41 | 1  | 0 | 1.162423  | 1.079758  | -1.977249 |
| 42 | 6  | 0 | -1.298868 | 1.645546  | -1.240572 |
| 43 | 8  | 0 | -1.321794 | 1.517076  | -2.447093 |
| 44 | 1  | 0 | -0.395070 | 1.164499  | 0.690086  |
| 45 | 8  | 0 | -2.331653 | 2.099634  | -0.519581 |
| 46 | 6  | 0 | -3.505202 | 2.423360  | -1.276354 |
| 47 | 1  | 0 | -3.283582 | 3.216493  | -1.987935 |
| 48 | 1  | 0 | -3.859026 | 1.542668  | -1.809159 |
| 49 | 1  | 0 | -4.240528 | 2.748331  | -0.547077 |
| 50 | 6  | 0 | 5.173468  | -1.795282 | -1.205845 |
| 51 | 6  | 0 | 5.989499  | -2.754129 | -0.629366 |
| 52 | 6  | 0 | 5.691663  | -3.245251 | 0.645883  |
| 53 | 6  | 0 | 4.583630  | -2.786052 | 1.342916  |
| 54 | 1  | 0 | 5.371764  | -1.383141 | -2.186518 |
| 55 | 1  | 0 | 6.858497  | -3.119406 | -1.159885 |
| 56 | 1  | 0 | 6.330276  | -3.992420 | 1.098992  |
| 57 | 1  | 0 | 4.332074  | -3.149444 | 2.329698  |
| 58 | 30 | 0 | 2.363259  | 2.185542  | 0.564149  |
| 59 | 17 | 0 | 1.536740  | 2.231983  | 2.599056  |
| 60 | 17 | 0 | 3.530650  | 3.528702  | -0.651529 |

**cis-exo-IM1-V**

Standard orientation:

| Center Number | Atomic Number | Atomic Type | Coordinates (Angstroms) |          |           |
|---------------|---------------|-------------|-------------------------|----------|-----------|
|               |               |             | X                       | Y        | Z         |
| 1             | 6             | 0           | -1.896221               | 1.640813 | 0.017982  |
| 2             | 7             | 0           | 0.167414                | 1.079350 | -0.941148 |
| 3             | 6             | 0           | -0.472163               | 1.572310 | 0.096737  |
| 4             | 6             | 0           | 0.212982                | 2.044638 | 1.338268  |
| 5             | 6             | 0           | -2.627669               | 0.919882 | -0.916266 |

Imaginary frequency: none  
 Electronic energy  $E = -4189.681769$  a.u.  
 Enthalpy  $H = -4189.646957$  a.u.  
 Entropy  $S = 217.478$  cal/mol/K  
 Gibbs free energy  $G = -4189.750288$  a.u.  
 Total free energy in solution  $E_{\text{sol}} = -4190.87551$  a.u.

|    |    |   |           |           |           |
|----|----|---|-----------|-----------|-----------|
| 6  | 6  | 0 | -0.573393 | 0.968376  | -2.215694 |
| 7  | 6  | 0 | -1.927557 | 0.274326  | -2.064105 |
| 8  | 1  | 0 | 0.251375  | 1.260693  | 2.097074  |
| 9  | 1  | 0 | -0.346026 | 2.891006  | 1.740301  |
| 10 | 1  | 0 | 1.222346  | 2.384925  | 1.125922  |
| 11 | 6  | 0 | -3.966755 | 0.883810  | -0.462054 |
| 12 | 6  | 0 | -4.002007 | 1.622485  | 0.745834  |
| 13 | 7  | 0 | -2.743640 | 2.080526  | 1.017671  |
| 14 | 1  | 0 | -2.472381 | 2.548167  | 1.864260  |
| 15 | 1  | 0 | 0.073866  | 0.461013  | -2.926638 |
| 16 | 1  | 0 | -0.740895 | 1.988450  | -2.567764 |
| 17 | 1  | 0 | -1.838951 | -0.801970 | -1.890676 |
| 18 | 1  | 0 | -2.478409 | 0.408944  | -2.997160 |
| 19 | 6  | 0 | -5.136672 | 0.268197  | -0.963715 |
| 20 | 6  | 0 | -6.298132 | 0.413710  | -0.237740 |
| 21 | 6  | 0 | -6.319338 | 1.169376  | 0.969536  |
| 22 | 6  | 0 | -5.196642 | 1.777665  | 1.470384  |
| 23 | 1  | 0 | -5.097058 | -0.300650 | -1.881137 |
| 24 | 1  | 0 | -5.232711 | 2.342462  | 2.392417  |
| 25 | 1  | 0 | -7.267791 | 1.243365  | 1.484365  |
| 26 | 8  | 0 | -7.498055 | -0.121905 | -0.573093 |
| 27 | 6  | 0 | -7.546235 | -0.912133 | -1.748171 |
| 28 | 1  | 0 | -7.281734 | -0.320240 | -2.627962 |
| 29 | 1  | 0 | -6.873392 | -1.770025 | -1.667987 |
| 30 | 1  | 0 | -8.571827 | -1.258290 | -1.835807 |
| 31 | 6  | 0 | 2.757927  | 0.523369  | 1.252267  |
| 32 | 6  | 0 | 3.536779  | 1.540270  | 0.496695  |
| 33 | 6  | 0 | 1.850228  | -0.289104 | 0.437654  |
| 34 | 6  | 0 | 1.460916  | 0.254015  | -0.904675 |
| 35 | 6  | 0 | 3.343350  | 1.716908  | -0.873232 |
| 36 | 8  | 0 | 2.463793  | 0.942956  | -1.594653 |
| 37 | 8  | 0 | 2.876980  | 0.401396  | 2.463538  |
| 38 | 6  | 0 | 0.797544  | -0.980121 | 1.167879  |
| 39 | 6  | 0 | -0.319342 | -1.508679 | 0.630602  |
| 40 | 1  | 0 | 1.184983  | -0.568643 | -1.561603 |
| 41 | 1  | 0 | 0.908576  | -0.988796 | 2.249394  |
| 42 | 6  | 0 | -1.452142 | -1.888115 | 1.480782  |
| 43 | 8  | 0 | -1.501037 | -1.837510 | 2.690153  |
| 44 | 1  | 0 | -0.459768 | -1.611643 | -0.436003 |
| 45 | 8  | 0 | -2.516726 | -2.232539 | 0.717843  |
| 46 | 6  | 0 | -3.714170 | -2.494160 | 1.453557  |
| 47 | 1  | 0 | -3.555121 | -3.303236 | 2.163762  |
| 48 | 1  | 0 | -4.026799 | -1.600349 | 1.993617  |
| 49 | 1  | 0 | -4.460147 | -2.769574 | 0.713272  |
| 50 | 6  | 0 | 4.476245  | 2.334592  | 1.157910  |
| 51 | 6  | 0 | 5.213066  | 3.278652  | 0.461386  |
| 52 | 6  | 0 | 5.011117  | 3.433655  | -0.912246 |
| 53 | 6  | 0 | 4.078340  | 2.657292  | -1.586511 |
| 54 | 1  | 0 | 4.610906  | 2.165946  | 2.218224  |
| 55 | 1  | 0 | 5.948100  | 3.884190  | 0.974168  |
| 56 | 1  | 0 | 5.588650  | 4.164212  | -1.464210 |
| 57 | 1  | 0 | 3.912292  | 2.755928  | -2.650642 |
| 58 | 30 | 0 | 3.121982  | -1.858826 | -0.205337 |
| 59 | 17 | 0 | 2.088150  | -2.915967 | -1.850314 |
| 60 | 17 | 0 | 5.149266  | -2.031773 | 0.540113  |

**cis-exo-TS2-V**

Standard orientation:

Imaginary frequency: -267.3131 cm<sup>-1</sup>

Electronic energy  $E = -4189.673593$  a.u.

Enthalpy  $H = -4189.639651$  a.u.

Entropy  $S = 212.239$  cal/mol/K  
Gibbs free energy  $G = -4189.740493$  a.u.

Center Atomic Atomic Coordinates (Angstroms)  
Number Number Type X Y Z

Total free energy in solution  $E_{\text{sol}} = -4190.85785$  a.u.

---

|    |    |   |           |           |           |
|----|----|---|-----------|-----------|-----------|
| 1  | 6  | 0 | 1.792060  | 1.069761  | -0.617819 |
| 2  | 7  | 0 | -0.317065 | 1.464041  | 0.427821  |
| 3  | 6  | 0 | 0.342693  | 1.051912  | -0.701726 |
| 4  | 6  | 0 | -0.272740 | 1.356136  | -2.047049 |
| 5  | 6  | 0 | 2.498098  | 1.016532  | 0.560964  |
| 6  | 6  | 0 | 0.491081  | 1.932444  | 1.576736  |
| 7  | 6  | 0 | 1.751103  | 1.108459  | 1.853508  |
| 8  | 1  | 0 | 0.010792  | 0.614500  | -2.794394 |
| 9  | 1  | 0 | 0.093869  | 2.342783  | -2.345962 |
| 10 | 1  | 0 | -1.355806 | 1.418251  | -1.991184 |
| 11 | 6  | 0 | 3.868251  | 0.838025  | 0.215295  |
| 12 | 6  | 0 | 3.924296  | 0.792123  | -1.197930 |
| 13 | 7  | 0 | 2.648308  | 0.942076  | -1.688105 |
| 14 | 1  | 0 | 2.371733  | 0.829472  | -2.648462 |
| 15 | 1  | 0 | -0.174209 | 1.963409  | 2.437213  |
| 16 | 1  | 0 | 0.789665  | 2.957454  | 1.348662  |
| 17 | 1  | 0 | 1.501506  | 0.113976  | 2.241718  |
| 18 | 1  | 0 | 2.335814  | 1.615065  | 2.624295  |
| 19 | 6  | 0 | 5.049505  | 0.711930  | 0.975418  |
| 20 | 6  | 0 | 6.240571  | 0.538273  | 0.298264  |
| 21 | 6  | 0 | 6.279366  | 0.496209  | -1.118936 |
| 22 | 6  | 0 | 5.138987  | 0.626024  | -1.876967 |
| 23 | 1  | 0 | 5.003888  | 0.744900  | 2.054324  |
| 24 | 1  | 0 | 5.183920  | 0.597860  | -2.958329 |
| 25 | 1  | 0 | 7.246394  | 0.360419  | -1.583990 |
| 26 | 8  | 0 | 7.455727  | 0.395558  | 0.893454  |
| 27 | 6  | 0 | 7.487323  | 0.420055  | 2.307729  |
| 28 | 1  | 0 | 7.123576  | 1.376770  | 2.691831  |
| 29 | 1  | 0 | 6.888031  | -0.392446 | 2.727305  |
| 30 | 1  | 0 | 8.528551  | 0.287156  | 2.588093  |
| 31 | 6  | 0 | -3.372044 | 0.271682  | -0.889184 |
| 32 | 6  | 0 | -3.896744 | 1.597147  | -0.502291 |
| 33 | 6  | 0 | -2.161479 | -0.160179 | -0.143466 |
| 34 | 6  | 0 | -1.562317 | 0.752189  | 0.884180  |
| 35 | 6  | 0 | -3.390355 | 2.258294  | 0.617650  |
| 36 | 8  | 0 | -2.458182 | 1.683880  | 1.436924  |
| 37 | 8  | 0 | -3.834557 | -0.377948 | -1.808594 |
| 38 | 6  | 0 | -1.273944 | -0.965354 | -0.866271 |
| 39 | 6  | 0 | 0.081217  | -1.066842 | -0.533469 |
| 40 | 1  | 0 | -1.225816 | 0.164260  | 1.738987  |
| 41 | 1  | 0 | -1.625328 | -1.352664 | -1.820225 |
| 42 | 6  | 0 | 1.014885  | -1.670171 | -1.497753 |
| 43 | 8  | 0 | 0.845890  | -1.682605 | -2.702163 |
| 44 | 1  | 0 | 0.397280  | -1.063486 | 0.500739  |
| 45 | 8  | 0 | 2.121117  | -2.117498 | -0.896221 |
| 46 | 6  | 0 | 3.124682  | -2.639162 | -1.776607 |
| 47 | 1  | 0 | 2.735426  | -3.500147 | -2.316570 |
| 48 | 1  | 0 | 3.432295  | -1.874162 | -2.487203 |
| 49 | 1  | 0 | 3.954736  | -2.919880 | -1.136623 |
| 50 | 6  | 0 | -4.899736 | 2.203651  | -1.264815 |
| 51 | 6  | 0 | -5.390842 | 3.448161  | -0.909516 |
| 52 | 6  | 0 | -4.878731 | 4.093012  | 0.220602  |
| 53 | 6  | 0 | -3.882830 | 3.505890  | 0.988162  |
| 54 | 1  | 0 | -5.273657 | 1.662603  | -2.124202 |
| 55 | 1  | 0 | -6.168550 | 3.916898  | -1.497114 |
| 56 | 1  | 0 | -5.261204 | 5.064918  | 0.505382  |
| 57 | 1  | 0 | -3.479551 | 3.986679  | 1.868735  |
| 58 | 30 | 0 | -2.553526 | -2.138508 | 0.818483  |
| 59 | 17 | 0 | -1.308437 | -2.202965 | 2.625949  |
| 60 | 17 | 0 | -4.009233 | -3.463532 | -0.041890 |

---

**cis-exo-IM2-V**

Standard orientation:

Imaginary frequency: none

Electronic energy  $E = -4189.734831$  a.u.Enthalpy  $H = -4189.700876$  a.u.Entropy  $S = 213.344$  cal/mol/KGibbs free energy  $G = -4189.802243$  a.u.Total free energy in solution  $E_{\text{sol}} = -4190.91577$  a.u.

| Center<br>Number | Atomic<br>Number | Atomic<br>Type | Coordinates (Angstroms) |           |           |
|------------------|------------------|----------------|-------------------------|-----------|-----------|
|                  |                  |                | X                       | Y         | Z         |
| 1                | 6                | 0              | 2.412891                | 0.192547  | -0.497376 |
| 2                | 7                | 0              | 0.482719                | 1.332151  | 0.329517  |
| 3                | 6                | 0              | 0.931131                | 0.377805  | -0.712955 |
| 4                | 6                | 0              | 0.655456                | 0.880587  | -2.140543 |
| 5                | 6                | 0              | 3.194010                | 0.850642  | 0.417224  |
| 6                | 6                | 0              | 1.381117                | 2.444553  | 0.654938  |
| 7                | 6                | 0              | 2.649971                | 1.916718  | 1.311178  |
| 8                | 1                | 0              | 1.089946                | 0.202022  | -2.872010 |
| 9                | 1                | 0              | 1.105424                | 1.865941  | -2.263222 |
| 10               | 1                | 0              | -0.414197               | 0.967009  | -2.331311 |
| 11               | 6                | 0              | 4.533335                | 0.371658  | 0.242962  |
| 12               | 6                | 0              | 4.491237                | -0.572410 | -0.803055 |
| 13               | 7                | 0              | 3.190681                | -0.659850 | -1.243573 |
| 14               | 1                | 0              | 2.829439                | -1.281787 | -1.948850 |
| 15               | 1                | 0              | 0.836436                | 3.110122  | 1.326564  |
| 16               | 1                | 0              | 1.637070                | 3.018461  | -0.242506 |
| 17               | 1                | 0              | 2.418197                | 1.533328  | 2.309087  |
| 18               | 1                | 0              | 3.369442                | 2.731627  | 1.427010  |
| 19               | 6                | 0              | 5.754678                | 0.672869  | 0.874763  |
| 20               | 6                | 0              | 6.891286                | 0.014593  | 0.440046  |
| 21               | 6                | 0              | 6.832842                | -0.932878 | -0.607667 |
| 22               | 6                | 0              | 5.644607                | -1.235905 | -1.236287 |
| 23               | 1                | 0              | 5.785072                | 1.396365  | 1.677210  |
| 24               | 1                | 0              | 5.611218                | -1.961283 | -2.039316 |
| 25               | 1                | 0              | 7.757798                | -1.411873 | -0.898835 |
| 26               | 8                | 0              | 8.140799                | 0.205255  | 0.959331  |
| 27               | 6                | 0              | 8.257588                | 1.126759  | 2.022408  |
| 28               | 1                | 0              | 7.955391                | 2.130662  | 1.710231  |
| 29               | 1                | 0              | 7.652613                | 0.818829  | 2.879955  |
| 30               | 1                | 0              | 9.307832                | 1.135061  | 2.302755  |
| 31               | 6                | 0              | -3.213367               | 0.844824  | 0.025908  |
| 32               | 6                | 0              | -3.538969               | 2.223958  | -0.275938 |
| 33               | 6                | 0              | -1.779920               | 0.527820  | 0.048288  |
| 34               | 6                | 0              | -0.874904               | 1.673478  | 0.366819  |
| 35               | 6                | 0              | -2.501681               | 3.120812  | -0.608690 |
| 36               | 8                | 0              | -1.200269               | 2.776002  | -0.567902 |
| 37               | 8                | 0              | -4.091851               | -0.023172 | 0.195006  |
| 38               | 6                | 0              | -1.314138               | -0.674632 | -0.288902 |
| 39               | 6                | 0              | 0.163393                | -0.935764 | -0.386410 |
| 40               | 1                | 0              | -1.118519               | 2.079158  | 1.355028  |
| 41               | 1                | 0              | -1.987322               | -1.478780 | -0.571384 |
| 42               | 6                | 0              | 0.373169                | -2.123243 | -1.318688 |
| 43               | 8                | 0              | 1.079243                | -2.172113 | -2.301601 |
| 44               | 1                | 0              | 0.503413                | -1.266894 | 0.603347  |
| 45               | 8                | 0              | -0.364880               | -3.142372 | -0.894632 |
| 46               | 6                | 0              | -0.348145               | -4.331328 | -1.706762 |
| 47               | 1                | 0              | -0.622651               | -4.080409 | -2.728518 |
| 48               | 1                | 0              | 0.646360                | -4.771921 | -1.688291 |
| 49               | 1                | 0              | -1.084070               | -4.988306 | -1.257152 |
| 50               | 6                | 0              | -4.879153               | 2.647001  | -0.337866 |
| 51               | 6                | 0              | -5.185901               | 3.930698  | -0.732401 |
| 52               | 6                | 0              | -4.146920               | 4.808029  | -1.080904 |
| 53               | 6                | 0              | -2.821121               | 4.417572  | -1.020799 |
| 54               | 1                | 0              | -5.649753               | 1.933349  | -0.078676 |
| 55               | 1                | 0              | -6.214561               | 4.259935  | -0.779591 |

|    |    |   |           |           |           |
|----|----|---|-----------|-----------|-----------|
| 56 | 1  | 0 | -4.384084 | 5.815933  | -1.397366 |
| 57 | 1  | 0 | -2.014658 | 5.090116  | -1.277755 |
| 58 | 30 | 0 | -3.709895 | -1.776590 | 1.049811  |
| 59 | 17 | 0 | -3.935667 | -3.423131 | -0.347443 |
| 60 | 17 | 0 | -3.082690 | -1.448896 | 3.092753  |

**cis-COM-VI**

Standard orientation:

| Center Number | Atomic Number | Atomic Type | Coordinates (Angstroms) |           |           |
|---------------|---------------|-------------|-------------------------|-----------|-----------|
|               |               |             | X                       | Y         | Z         |
| 1             | 6             | 0           | 2.404820                | -1.335359 | 0.053400  |
| 2             | 6             | 0           | 3.685001                | -0.605688 | 0.102016  |
| 3             | 6             | 0           | 1.264697                | -0.517896 | -0.399660 |
| 4             | 6             | 0           | 1.443613                | 0.798729  | -0.679910 |
| 5             | 6             | 0           | 3.739016                | 0.743487  | -0.238698 |
| 6             | 8             | 0           | 2.612254                | 1.433977  | -0.617261 |
| 7             | 8             | 0           | 2.295313                | -2.511197 | 0.356057  |
| 8             | 6             | 0           | -0.034248               | -1.161995 | -0.471131 |
| 9             | 6             | 0           | -1.129470               | -0.689092 | -1.100223 |
| 10            | 1             | 0           | 0.642714                | 1.476042  | -0.951089 |
| 11            | 1             | 0           | -0.098263               | -2.116188 | 0.043416  |
| 12            | 6             | 0           | -2.395644               | -1.443994 | -1.026002 |
| 13            | 8             | 0           | -2.577068               | -2.621509 | -0.945898 |
| 14            | 1             | 0           | -1.122476               | 0.203400  | -1.716207 |
| 15            | 8             | 0           | -3.437274               | -0.524238 | -0.985025 |
| 16            | 6             | 0           | -4.752751               | -1.094587 | -0.762677 |
| 17            | 1             | 0           | -4.951805               | -1.824097 | -1.541722 |
| 18            | 1             | 0           | -4.775035               | -1.561460 | 0.218886  |
| 19            | 1             | 0           | -5.441024               | -0.258084 | -0.819963 |
| 20            | 6             | 0           | 4.865212                | -1.249730 | 0.489692  |
| 21            | 6             | 0           | 6.057937                | -0.551459 | 0.528387  |
| 22            | 6             | 0           | 6.085693                | 0.805566  | 0.180118  |
| 23            | 6             | 0           | 4.929430                | 1.463429  | -0.205115 |
| 24            | 1             | 0           | 4.802095                | -2.297539 | 0.751963  |
| 25            | 1             | 0           | 6.970195                | -1.049480 | 0.827735  |
| 26            | 1             | 0           | 7.019886                | 1.350740  | 0.212311  |
| 27            | 1             | 0           | 4.922642                | 2.510534  | -0.475103 |
| 28            | 30            | 0           | -2.486600               | 0.791871  | 0.391396  |
| 29            | 17            | 0           | -2.949518               | -0.159679 | 2.268477  |
| 30            | 17            | 0           | -1.844396               | 2.667048  | -0.478846 |

Imaginary frequency: none  
 Electronic energy  $E = -3501.474572$  a.u.  
 Enthalpy  $H = -3501.453639$  a.u.  
 Entropy  $S = 154.359$  cal/mol/K  
 Gibbs free energy  $G = -3501.526980$  a.u.  
 Total free energy in solution  $E_{\text{sol}} = -3502.21159$  a.u.

**cis-endo-TS1-VI**

Standard orientation:

| Center Number | Atomic Number | Atomic Type | Coordinates (Angstroms) |          |           |
|---------------|---------------|-------------|-------------------------|----------|-----------|
|               |               |             | X                       | Y        | Z         |
| 1             | 6             | 0           | 2.278436                | 1.194667 | 1.100438  |
| 2             | 7             | 0           | 0.052574                | 1.494013 | 0.370116  |
| 3             | 6             | 0           | 0.856810                | 1.321801 | 1.360480  |
| 4             | 6             | 0           | 0.347294                | 1.198269 | 2.767237  |
| 5             | 6             | 0           | 2.770295                | 0.932307 | -0.158107 |
| 6             | 6             | 0           | 0.596805                | 1.708474 | -0.969657 |

Imaginary frequency:  $-155.0924$  cm<sup>-1</sup>  
 Electronic energy  $E = -4189.684792$  a.u.  
 Enthalpy  $H = -4189.649355$  a.u.  
 Entropy  $S = 224.532$  cal/mol/K  
 Gibbs free energy  $G = -4189.756037$  a.u.  
 Total free energy in solution  $E_{\text{sol}} = -4190.85703$  a.u.

|    |    |   |           |           |           |
|----|----|---|-----------|-----------|-----------|
| 7  | 6  | 0 | 1.815011  | 0.844408  | -1.306348 |
| 8  | 1  | 0 | 0.375579  | 0.154385  | 3.087343  |
| 9  | 1  | 0 | -0.672034 | 1.566963  | 2.846030  |
| 10 | 1  | 0 | 0.974904  | 1.785777  | 3.441147  |
| 11 | 6  | 0 | 4.167920  | 0.697672  | -0.018402 |
| 12 | 6  | 0 | 4.465100  | 0.846051  | 1.356602  |
| 13 | 7  | 0 | 3.299862  | 1.134829  | 2.022862  |
| 14 | 1  | 0 | 3.217590  | 1.292120  | 3.011235  |
| 15 | 1  | 0 | 0.880628  | 2.764911  | -1.027024 |
| 16 | 1  | 0 | -0.209527 | 1.537659  | -1.683265 |
| 17 | 1  | 0 | 2.256057  | 1.211464  | -2.234767 |
| 18 | 1  | 0 | 1.519681  | -0.196657 | -1.478748 |
| 19 | 6  | 0 | 5.192039  | 0.385045  | -0.937305 |
| 20 | 6  | 0 | 6.475171  | 0.238145  | -0.450734 |
| 21 | 6  | 0 | 6.757782  | 0.396720  | 0.930659  |
| 22 | 6  | 0 | 5.773591  | 0.700690  | 1.840576  |
| 23 | 8  | 0 | 7.563815  | -0.059274 | -1.211644 |
| 24 | 6  | 0 | 7.351113  | -0.225068 | -2.600114 |
| 25 | 1  | 0 | 4.959763  | 0.270509  | -1.986112 |
| 26 | 1  | 0 | 7.785345  | 0.268287  | 1.242908  |
| 27 | 1  | 0 | 6.005523  | 0.817089  | 2.891311  |
| 28 | 1  | 0 | 6.959528  | 0.691693  | -3.049170 |
| 29 | 1  | 0 | 8.322612  | -0.454778 | -3.028980 |
| 30 | 1  | 0 | 6.660020  | -1.049502 | -2.795519 |
| 31 | 30 | 0 | -2.070067 | -2.918733 | 0.759299  |
| 32 | 17 | 0 | -1.240417 | -2.111545 | 2.624487  |
| 33 | 17 | 0 | -3.794758 | -4.092234 | 0.170648  |
| 34 | 6  | 0 | -3.059308 | 1.799229  | -1.588778 |
| 35 | 6  | 0 | -3.250832 | 3.099875  | -0.902930 |
| 36 | 6  | 0 | -2.385513 | 0.792760  | -0.776983 |
| 37 | 6  | 0 | -1.974556 | 1.100919  | 0.531010  |
| 38 | 6  | 0 | -2.909856 | 3.246867  | 0.438549  |
| 39 | 8  | 0 | -2.399735 | 2.198390  | 1.172441  |
| 40 | 8  | 0 | -3.422046 | 1.616769  | -2.742574 |
| 41 | 6  | 0 | -2.071798 | -0.458597 | -1.349595 |
| 42 | 6  | 0 | -1.239186 | -1.412908 | -0.816519 |
| 43 | 1  | 0 | -1.753516 | 0.305186  | 1.230360  |
| 44 | 1  | 0 | -2.536139 | -0.663991 | -2.310274 |
| 45 | 6  | 0 | -0.975462 | -2.649504 | -1.555418 |
| 46 | 8  | 0 | -1.119428 | -2.902241 | -2.717778 |
| 47 | 1  | 0 | -0.580248 | -1.192492 | 0.017424  |
| 48 | 8  | 0 | -0.578692 | -3.617251 | -0.630984 |
| 49 | 6  | 0 | -0.458103 | -4.958478 | -1.154813 |
| 50 | 1  | 0 | -1.435664 | -5.303303 | -1.483038 |
| 51 | 1  | 0 | 0.243724  | -4.952830 | -1.983800 |
| 52 | 1  | 0 | -0.087721 | -5.557651 | -0.329540 |
| 53 | 6  | 0 | -3.793223 | 4.193870  | -1.581725 |
| 54 | 6  | 0 | -3.982650 | 5.399944  | -0.927794 |
| 55 | 6  | 0 | -3.635534 | 5.521337  | 0.421563  |
| 56 | 6  | 0 | -3.099419 | 4.446187  | 1.115029  |
| 57 | 1  | 0 | -4.058020 | 4.054015  | -2.621537 |
| 58 | 1  | 0 | -4.402137 | 6.245781  | -1.455865 |
| 59 | 1  | 0 | -3.786785 | 6.461711  | 0.935496  |
| 60 | 1  | 0 | -2.829118 | 4.512754  | 2.160061  |

**cis-endo-IM1-VI**

Standard orientation:

Center Atomic Atomic Coordinates (Angstroms)  
Number Number Type X Y Z

Imaginary frequency: none

Electronic energy  $E = -4189.695584$  a.u.

Enthalpy  $H = -4189.660454$  a.u.

Entropy  $S = 222.065$  cal/mol/K

Gibbs free energy  $G = -4189.765964$  a.u.

Total free energy in solution  $E_{\text{sol}} = -4190.88363$  a.u.



|    |    |   |           |           |           |
|----|----|---|-----------|-----------|-----------|
| 1  | 6  | 0 | -2.415276 | 0.350511  | -1.091746 |
| 2  | 7  | 0 | -0.325707 | 1.079832  | -0.319196 |
| 3  | 6  | 0 | -1.052701 | 0.695161  | -1.343936 |
| 4  | 6  | 0 | -0.467261 | 0.570251  | -2.711204 |
| 5  | 6  | 0 | -2.899466 | 0.089649  | 0.180416  |
| 6  | 6  | 0 | -0.974344 | 1.352876  | 0.981086  |
| 7  | 6  | 0 | -1.989951 | 0.278269  | 1.349744  |
| 8  | 1  | 0 | 0.188504  | -0.308660 | -2.746051 |
| 9  | 1  | 0 | 0.122515  | 1.450049  | -2.959417 |
| 10 | 1  | 0 | -1.247662 | 0.431705  | -3.454989 |
| 11 | 6  | 0 | -4.213067 | -0.417129 | 0.033211  |
| 12 | 6  | 0 | -4.484972 | -0.425883 | -1.357082 |
| 13 | 7  | 0 | -3.378332 | 0.019430  | -2.024257 |
| 14 | 1  | 0 | -3.321326 | 0.161390  | -3.017061 |
| 15 | 1  | 0 | -1.470562 | 2.323673  | 0.891220  |
| 16 | 1  | 0 | -0.184947 | 1.421181  | 1.722025  |
| 17 | 1  | 0 | -2.531647 | 0.605726  | 2.238144  |
| 18 | 1  | 0 | -1.486235 | -0.662054 | 1.598384  |
| 19 | 6  | 0 | -5.188699 | -0.856641 | 0.958036  |
| 20 | 6  | 0 | -6.401813 | -1.275517 | 0.458754  |
| 21 | 6  | 0 | -6.663660 | -1.264212 | -0.941207 |
| 22 | 6  | 0 | -5.730584 | -0.846695 | -1.854722 |
| 23 | 8  | 0 | -7.438554 | -1.725619 | 1.207935  |
| 24 | 6  | 0 | -7.244376 | -1.786091 | 2.610127  |
| 25 | 1  | 0 | -4.971426 | -0.854886 | 2.016092  |
| 26 | 1  | 0 | -7.639266 | -1.605979 | -1.259578 |
| 27 | 1  | 0 | -5.946623 | -0.850917 | -2.914840 |
| 28 | 1  | 0 | -7.049674 | -0.791811 | 3.020287  |
| 29 | 1  | 0 | -8.168761 | -2.177223 | 3.024632  |
| 30 | 1  | 0 | -6.416949 | -2.455031 | 2.860016  |
| 31 | 30 | 0 | 3.109455  | -2.143227 | -0.674331 |
| 32 | 17 | 0 | 1.828840  | -2.138379 | -2.495555 |
| 33 | 17 | 0 | 5.231714  | -2.594070 | -0.455720 |
| 34 | 6  | 0 | 2.184232  | 2.672886  | 1.434869  |
| 35 | 6  | 0 | 1.654247  | 3.878966  | 0.740539  |
| 36 | 6  | 0 | 1.914113  | 1.413069  | 0.759092  |
| 37 | 6  | 0 | 1.148798  | 1.408566  | -0.518706 |
| 38 | 6  | 0 | 1.184082  | 3.788647  | -0.568473 |
| 39 | 8  | 0 | 1.215259  | 2.602146  | -1.263961 |
| 40 | 8  | 0 | 2.757854  | 2.769224  | 2.512420  |
| 41 | 6  | 0 | 2.300041  | 0.227880  | 1.333570  |
| 42 | 6  | 0 | 1.989004  | -1.069831 | 0.882083  |
| 43 | 1  | 0 | 1.519857  | 0.624628  | -1.178338 |
| 44 | 1  | 0 | 2.905655  | 0.309944  | 2.232220  |
| 45 | 6  | 0 | 2.349986  | -2.205520 | 1.722943  |
| 46 | 8  | 0 | 2.777874  | -2.237723 | 2.845969  |
| 47 | 1  | 0 | 1.127626  | -1.229234 | 0.238770  |
| 48 | 8  | 0 | 2.233176  | -3.363329 | 0.948956  |
| 49 | 6  | 0 | 2.774877  | -4.554761 | 1.549582  |
| 50 | 1  | 0 | 3.846129  | -4.431387 | 1.693168  |
| 51 | 1  | 0 | 2.284332  | -4.733501 | 2.502785  |
| 52 | 1  | 0 | 2.567393  | -5.353850 | 0.845079  |
| 53 | 6  | 0 | 1.647798  | 5.119999  | 1.378111  |
| 54 | 6  | 0 | 1.176595  | 6.246982  | 0.721337  |
| 55 | 6  | 0 | 0.716159  | 6.137017  | -0.592479 |
| 56 | 6  | 0 | 0.717320  | 4.910189  | -1.244784 |
| 57 | 1  | 0 | 2.032884  | 5.162131  | 2.388649  |
| 58 | 1  | 0 | 1.173849  | 7.207517  | 1.218941  |
| 59 | 1  | 0 | 0.354382  | 7.014124  | -1.113860 |
| 60 | 1  | 0 | 0.375805  | 4.806678  | -2.266042 |

---

**cis-endo-TS2-VI**

Standard orientation:

Imaginary frequency: -175.9002 cm<sup>-1</sup>Electronic energy  $E = -4189.673113$  a.u.Enthalpy  $H = -4189.639047$  a.u.Entropy  $S = 213.773$  cal/mol/KGibbs free energy  $G = -4189.740618$  a.u.Total free energy in solution  $E_{\text{sol}} = -4190.85827$  a.u. 1

| Center Number | Atomic Number | Atomic Type | Coordinates (Angstroms) |           |           |
|---------------|---------------|-------------|-------------------------|-----------|-----------|
|               |               |             | X                       | Y         | Z         |
| 6             | 0             | 1.024130    | -0.924854               | -1.274027 |           |
| 2             | 7             | 0           | -1.348089               | -0.994719 | -1.338427 |
| 3             | 6             | 0           | -0.231981               | -0.261769 | -1.557917 |
| 4             | 6             | 0           | -0.229097               | 0.789188  | -2.641393 |
| 5             | 6             | 0           | 1.152776                | -1.991825 | -0.422508 |
| 6             | 6             | 0           | -1.223700               | -2.376243 | -0.816445 |
| 7             | 6             | 0           | -0.075817               | -2.600007 | 0.174027  |
| 8             | 1             | 0           | 0.545728                | 1.533750  | -2.462339 |
| 9             | 1             | 0           | -1.173545               | 1.318586  | -2.737091 |
| 10            | 1             | 0           | -0.033698               | 0.282039  | -3.590771 |
| 11            | 6             | 0           | 2.551438                | -2.239479 | -0.272032 |
| 12            | 6             | 0           | 3.219815                | -1.273295 | -1.066654 |
| 13            | 7             | 0           | 2.269211                | -0.462487 | -1.649805 |
| 14            | 1             | 0           | 2.449984                | 0.235401  | -2.349158 |
| 15            | 1             | 0           | -1.058057               | -3.014159 | -1.687519 |
| 16            | 1             | 0           | -2.181891               | -2.649757 | -0.380672 |
| 17            | 1             | 0           | 0.041844                | -3.676220 | 0.318289  |
| 18            | 1             | 0           | -0.288319               | -2.158181 | 1.151197  |
| 19            | 6             | 0           | 3.294894                | -3.179698 | 0.449512  |
| 20            | 6             | 0           | 4.677026                | -3.148195 | 0.360816  |
| 21            | 6             | 0           | 5.330198                | -2.188608 | -0.443070 |
| 22            | 6             | 0           | 4.609544                | -1.247976 | -1.161910 |
| 23            | 8             | 0           | 5.341057                | -4.092195 | 1.087689  |
| 24            | 6             | 0           | 6.754485                | -4.086610 | 1.047944  |
| 25            | 1             | 0           | 2.825713                | -3.925364 | 1.077180  |
| 26            | 1             | 0           | 6.408199                | -2.175387 | -0.507916 |
| 27            | 1             | 0           | 5.122182                | -0.518520 | -1.776381 |
| 28            | 1             | 0           | 7.158722                | -3.142756 | 1.423136  |
| 29            | 1             | 0           | 7.074039                | -4.898195 | 1.696097  |
| 30            | 1             | 0           | 7.124584                | -4.265572 | 0.034694  |
| 31            | 6             | 0           | -3.293025               | -0.847664 | 1.493044  |
| 32            | 6             | 0           | -4.399868               | -1.585035 | 0.846595  |
| 33            | 6             | 0           | -2.427828               | -0.092756 | 0.574879  |
| 34            | 6             | 0           | -2.562086               | -0.239150 | -0.909410 |
| 35            | 6             | 0           | -4.553541               | -1.561336 | -0.541098 |
| 36            | 8             | 0           | -3.709723               | -0.895682 | -1.386793 |
| 37            | 8             | 0           | -3.117249               | -0.866265 | 2.700964  |
| 38            | 6             | 0           | -1.295147               | 0.494579  | 1.047693  |
| 39            | 6             | 0           | -0.374497               | 1.174923  | 0.198452  |
| 40            | 1             | 0           | -2.529879               | 0.716729  | -1.425701 |
| 41            | 1             | 0           | -1.037982               | 0.336815  | 2.090711  |
| 42            | 6             | 0           | 0.989246                | 1.272877  | 0.653715  |
| 43            | 8             | 0           | 1.558898                | 0.580371  | 1.453438  |
| 44            | 1             | 0           | -0.734035               | 1.858467  | -0.559485 |
| 45            | 8             | 0           | 1.680705                | 2.299256  | -0.030837 |
| 46            | 6             | 0           | 3.065201                | 2.446098  | 0.367386  |
| 47            | 1             | 0           | 3.113433                | 2.730473  | 1.415663  |
| 48            | 1             | 0           | 3.574789                | 1.499224  | 0.208616  |
| 49            | 1             | 0           | 3.468798                | 3.227148  | -0.270525 |
| 50            | 6             | 0           | -5.314508               | -2.301863 | 1.624508  |
| 51            | 6             | 0           | -6.366610               | -2.978484 | 1.033128  |
| 52            | 6             | 0           | -6.509595               | -2.939221 | -0.357342 |
| 53            | 6             | 0           | -5.611112               | -2.237540 | -1.147020 |
| 54            | 1             | 0           | -5.164670               | -2.297287 | 2.696252  |
| 55            | 1             | 0           | -7.073516               | -3.529622 | 1.638270  |
| 56            | 1             | 0           | -7.331089               | -3.462077 | -0.830517 |

|    |    |   |           |           |           |
|----|----|---|-----------|-----------|-----------|
| 57 | 1  | 0 | -5.705725 | -2.197074 | -2.223614 |
| 58 | 30 | 0 | 0.337940  | 3.854593  | 0.191141  |
| 59 | 17 | 0 | -0.537884 | 4.342786  | -1.726266 |
| 60 | 17 | 0 | 0.631225  | 4.555683  | 2.201210  |

**cis-endo-IM2-VI**

Standard orientation:

Center Atomic Atomic Coordinates (Angstroms)  
Number Number Type X Y Z

|    |   |   |           |           |           |
|----|---|---|-----------|-----------|-----------|
| 1  | 6 | 0 | 0.894620  | -0.608011 | -0.727715 |
| 2  | 7 | 0 | -1.465076 | -0.844675 | -1.052595 |
| 3  | 6 | 0 | -0.404300 | 0.143390  | -0.839100 |
| 4  | 6 | 0 | -0.350755 | 1.110311  | -2.027489 |
| 5  | 6 | 0 | 1.019082  | -1.747394 | 0.012491  |
| 6  | 6 | 0 | -1.351727 | -2.179743 | -0.402442 |
| 7  | 6 | 0 | -0.212589 | -2.338838 | 0.614351  |
| 8  | 1 | 0 | 0.493824  | 1.800202  | -1.925553 |
| 9  | 1 | 0 | -1.248024 | 1.723406  | -2.103255 |
| 10 | 1 | 0 | -0.222055 | 0.545741  | -2.950036 |
| 11 | 6 | 0 | 2.401044  | -2.131717 | -0.038750 |
| 12 | 6 | 0 | 3.052376  | -1.160354 | -0.840260 |
| 13 | 7 | 0 | 2.107515  | -0.247346 | -1.263689 |
| 14 | 1 | 0 | 2.323980  | 0.593307  | -1.774962 |
| 15 | 1 | 0 | -1.203474 | -2.910738 | -1.198022 |
| 16 | 1 | 0 | -2.302067 | -2.410015 | 0.078682  |
| 17 | 1 | 0 | -0.084382 | -3.402871 | 0.822002  |
| 18 | 1 | 0 | -0.463718 | -1.851392 | 1.561119  |
| 19 | 6 | 0 | 3.145120  | -3.178393 | 0.516258  |
| 20 | 6 | 0 | 4.509196  | -3.232623 | 0.271973  |
| 21 | 6 | 0 | 5.146413  | -2.253335 | -0.519052 |
| 22 | 6 | 0 | 4.423252  | -1.212091 | -1.080967 |
| 23 | 8 | 0 | 5.172715  | -4.279026 | 0.848394  |
| 24 | 6 | 0 | 6.564516  | -4.379728 | 0.626661  |
| 25 | 1 | 0 | 2.692666  | -3.942884 | 1.133997  |
| 26 | 1 | 0 | 6.210193  | -2.303038 | -0.698767 |
| 27 | 1 | 0 | 4.915415  | -0.461522 | -1.686524 |
| 28 | 1 | 0 | 7.094803  | -3.507846 | 1.019930  |
| 29 | 1 | 0 | 6.888950  | -5.269027 | 1.160838  |
| 30 | 1 | 0 | 6.791360  | -4.493255 | -0.436975 |
| 31 | 6 | 0 | -4.296084 | -0.025497 | 1.236373  |
| 32 | 6 | 0 | -5.319316 | -0.686646 | 0.407823  |
| 33 | 6 | 0 | -2.982669 | 0.145641  | 0.562447  |
| 34 | 6 | 0 | -2.779860 | -0.262255 | -0.875799 |
| 35 | 6 | 0 | -4.981373 | -1.232080 | -0.836455 |
| 36 | 8 | 0 | -3.724536 | -1.210615 | -1.359151 |
| 37 | 8 | 0 | -4.499854 | 0.355415  | 2.374367  |
| 38 | 6 | 0 | -1.957355 | 0.710557  | 1.199295  |
| 39 | 6 | 0 | -0.657708 | 1.009682  | 0.509192  |
| 40 | 1 | 0 | -2.861735 | 0.615926  | -1.521527 |
| 41 | 1 | 0 | -2.075044 | 1.011385  | 2.233982  |
| 42 | 6 | 0 | 0.472935  | 0.876066  | 1.492866  |
| 43 | 8 | 0 | 0.477748  | 0.285549  | 2.529816  |
| 44 | 1 | 0 | -0.694207 | 2.064981  | 0.211495  |
| 45 | 8 | 0 | 1.613989  | 1.544584  | 1.054505  |
| 46 | 6 | 0 | 2.843949  | 1.162419  | 1.743208  |
| 47 | 1 | 0 | 2.817205  | 1.555426  | 2.755234  |
| 48 | 1 | 0 | 2.905893  | 0.078060  | 1.745496  |
| 49 | 1 | 0 | 3.649620  | 1.594147  | 1.156674  |

Imaginary frequency: none  
 Electronic energy  $E = -4189.694959$  a.u.  
 Enthalpy  $H = -4189.661008$  a.u.  
 Entropy  $S = 212.419$  cal/mol/K  
 Gibbs free energy  $G = -4189.761935$  a.u.  
 Total free energy in solution  $E_{\text{sol}} = -4190.87866$  a.u.

|    |    |   |           |           |           |
|----|----|---|-----------|-----------|-----------|
| 50 | 6  | 0 | -6.633203 | -0.799856 | 0.877444  |
| 51 | 6  | 0 | -7.598504 | -1.441097 | 0.123950  |
| 52 | 6  | 0 | -7.246390 | -1.985627 | -1.116115 |
| 53 | 6  | 0 | -5.951025 | -1.886108 | -1.598170 |
| 54 | 1  | 0 | -6.854042 | -0.370419 | 1.846092  |
| 55 | 1  | 0 | -8.613606 | -1.523874 | 0.487684  |
| 56 | 1  | 0 | -7.994100 | -2.491368 | -1.713976 |
| 57 | 1  | 0 | -5.662867 | -2.301609 | -2.554108 |
| 58 | 30 | 0 | 1.629941  | 3.217923  | -0.109608 |
| 59 | 17 | 0 | 3.241491  | 2.949686  | -1.528579 |
| 60 | 17 | 0 | 0.128023  | 4.620694  | 0.500177  |

**cis-exo-TS1-VI**

Standard orientation:

Imaginary frequency: -211.7019 cm<sup>-1</sup>

Electronic energy  $E = -4189.679927$  a.u.

Enthalpy  $H = -4189.645850$  a.u.

Entropy  $S = 208.397$  cal/mol/K

Gibbs free energy  $G = -4189.744866$  a.u.

Total free energy in solution  $E_{\text{sol}} = -4190.86385$  a.u.

| Center Number | Atomic Number | Atomic Type | Coordinates (Angstroms) |           |           |
|---------------|---------------|-------------|-------------------------|-----------|-----------|
|               |               |             | X                       | Y         | Z         |
| 1             | 6             | 0           | -0.201008               | -1.122360 | 1.562605  |
| 2             | 7             | 0           | -2.143700               | -1.335739 | 0.248595  |
| 3             | 6             | 0           | -1.572269               | -0.775069 | 1.281359  |
| 4             | 6             | 0           | -2.294831               | 0.208574  | 2.148637  |
| 5             | 6             | 0           | 0.598719                | -1.696630 | 0.588671  |
| 6             | 6             | 0           | -1.505600               | -2.534746 | -0.315220 |
| 7             | 6             | 0           | -0.016134               | -2.349730 | -0.605307 |
| 8             | 1             | 0           | -1.877652               | 1.211517  | 2.051392  |
| 9             | 1             | 0           | -2.176591               | -0.125293 | 3.184691  |
| 10            | 1             | 0           | -3.355573               | 0.231452  | 1.921215  |
| 11            | 6             | 0           | 1.940352                | -1.397590 | 0.936481  |
| 12            | 6             | 0           | 1.900358                | -0.712693 | 2.173372  |
| 13            | 7             | 0           | 0.590178                | -0.549513 | 2.534824  |
| 14            | 1             | 0           | 0.264288                | -0.028659 | 3.330299  |
| 15            | 1             | 0           | -2.065781               | -2.806812 | -1.208191 |
| 16            | 1             | 0           | -1.637007               | -3.328143 | 0.423344  |
| 17            | 1             | 0           | 0.168831                | -1.757613 | -1.504284 |
| 18            | 1             | 0           | 0.424660                | -3.333237 | -0.785349 |
| 19            | 6             | 0           | 3.181462                | -1.612593 | 0.271941  |
| 20            | 6             | 0           | 4.343165                | -1.234995 | 0.938928  |
| 21            | 6             | 0           | 4.278238                | -0.577364 | 2.201934  |
| 22            | 6             | 0           | 3.082432                | -0.317200 | 2.823593  |
| 23            | 1             | 0           | 3.210337                | -2.187431 | -0.643591 |
| 24            | 1             | 0           | 3.056781                | 0.194750  | 3.777040  |
| 25            | 1             | 0           | 5.218369                | -0.283293 | 2.647479  |
| 26            | 8             | 0           | 5.583115                | -1.437983 | 0.482997  |
| 27            | 6             | 0           | 5.730005                | -1.995319 | -0.820524 |
| 28            | 1             | 0           | 5.327556                | -3.010419 | -0.850054 |
| 29            | 1             | 0           | 5.238539                | -1.360854 | -1.559690 |
| 30            | 1             | 0           | 6.798015                | -2.014313 | -1.011081 |
| 31            | 30            | 0           | 2.863287                | 0.477208  | -0.936884 |
| 32            | 17            | 0           | 1.867355                | -0.370737 | -2.714154 |
| 33            | 17            | 0           | 4.852915                | 1.431308  | -1.035264 |
| 34            | 6             | 0           | -4.303630               | 1.495629  | -0.195650 |
| 35            | 6             | 0           | -5.405508               | 0.493003  | -0.163803 |
| 36            | 6             | 0           | -3.030497               | 0.972296  | -0.635931 |
| 37            | 6             | 0           | -2.912627               | -0.432393 | -0.959408 |
| 38            | 6             | 0           | -5.223510               | -0.781465 | -0.696079 |
| 39            | 8             | 0           | -4.037708               | -1.148653 | -1.288042 |
| 40            | 8             | 0           | -4.495803               | 2.648937  | 0.181201  |
| 41            | 6             | 0           | -1.883391               | 1.767377  | -0.477999 |
| 42            | 6             | 0           | -0.558927               | 1.398433  | -0.539551 |
| 43            | 1             | 0           | -2.159699               | -0.640126 | -1.718132 |

|    |   |   |           |           |           |
|----|---|---|-----------|-----------|-----------|
| 44 | 1 | 0 | -2.090689 | 2.781820  | -0.148370 |
| 45 | 6 | 0 | 0.397746  | 2.340052  | -0.024735 |
| 46 | 8 | 0 | 0.216333  | 3.470879  | 0.350126  |
| 47 | 1 | 0 | -0.209268 | 0.437597  | -0.883442 |
| 48 | 8 | 0 | 1.709020  | 1.789380  | 0.163387  |
| 49 | 6 | 0 | 2.549296  | 2.668477  | 0.965510  |
| 50 | 1 | 0 | 2.814521  | 3.547400  | 0.386411  |
| 51 | 1 | 0 | 1.995711  | 2.958165  | 1.853477  |
| 52 | 1 | 0 | 3.435741  | 2.097357  | 1.212937  |
| 53 | 6 | 0 | -6.646294 | 0.820133  | 0.386834  |
| 54 | 6 | 0 | -7.676768 | -0.106852 | 0.402142  |
| 55 | 6 | 0 | -7.473482 | -1.376617 | -0.144803 |
| 56 | 6 | 0 | -6.247857 | -1.721466 | -0.698253 |
| 57 | 1 | 0 | -6.763915 | 1.819661  | 0.784516  |
| 58 | 1 | 0 | -8.636701 | 0.151713  | 0.829057  |
| 59 | 1 | 0 | -8.276565 | -2.102610 | -0.139915 |
| 60 | 1 | 0 | -6.068719 | -2.695642 | -1.132890 |

**cis-exo-IM1-VI**

Standard orientation:

| Center Number | Atomic Number | Atomic Type | Coordinates (Angstroms) |           |           |
|---------------|---------------|-------------|-------------------------|-----------|-----------|
|               |               |             | X                       | Y         | Z         |
| 6             | 0             | -0.239432   | -1.174158               | 1.486690  |           |
| 2             | 7             | 0           | -2.129243               | -1.297947 | 0.099615  |
| 3             | 6             | 0           | -1.589485               | -0.787370 | 1.181648  |
| 4             | 6             | 0           | -2.322931               | 0.162202  | 2.077245  |
| 5             | 6             | 0           | 0.582885                | -1.715913 | 0.509165  |
| 6             | 6             | 0           | -1.501054               | -2.499284 | -0.474546 |
| 7             | 6             | 0           | -0.004603               | -2.321930 | -0.721625 |
| 8             | 1             | 0           | -1.943399               | 1.179652  | 1.976705  |
| 9             | 1             | 0           | -2.164678               | -0.177410 | 3.105556  |
| 10            | 1             | 0           | -3.389765               | 0.152771  | 1.878740  |
| 11            | 6             | 0           | 1.915471                | -1.434351 | 0.895923  |
| 12            | 6             | 0           | 1.849536                | -0.792741 | 2.154874  |
| 13            | 7             | 0           | 0.534098                | -0.641661 | 2.497063  |
| 14            | 1             | 0           | 0.195263                | -0.135270 | 3.296458  |
| 15            | 1             | 0           | -2.045452               | -2.740025 | -1.385185 |
| 16            | 1             | 0           | -1.660545               | -3.304988 | 0.244385  |
| 17            | 1             | 0           | 0.209902                | -1.700706 | -1.594250 |
| 18            | 1             | 0           | 0.430632                | -3.303869 | -0.922496 |
| 19            | 6             | 0           | 3.169306                | -1.629567 | 0.249156  |
| 20            | 6             | 0           | 4.315954                | -1.273248 | 0.950147  |
| 21            | 6             | 0           | 4.225081                | -0.656412 | 2.233673  |
| 22            | 6             | 0           | 3.018860                | -0.416847 | 2.841097  |
| 23            | 1             | 0           | 3.216025                | -2.168123 | -0.687325 |
| 24            | 1             | 0           | 2.974172                | 0.064460  | 3.809625  |
| 25            | 1             | 0           | 5.156537                | -0.375977 | 2.705499  |
| 26            | 8             | 0           | 5.565225                | -1.460404 | 0.514557  |
| 27            | 6             | 0           | 5.739617                | -1.971653 | -0.804505 |
| 28            | 1             | 0           | 5.341243                | -2.986192 | -0.876908 |
| 29            | 1             | 0           | 5.260532                | -1.313312 | -1.530734 |
| 30            | 1             | 0           | 6.811188                | -1.981154 | -0.974461 |
| 31            | 30            | 0           | 2.880356                | 0.524849  | -0.913256 |
| 32            | 17            | 0           | 1.944812                | -0.303683 | -2.729929 |
| 33            | 17            | 0           | 4.881103                | 1.457647  | -0.912413 |
| 34            | 6             | 0           | -4.297915               | 1.505866  | -0.201052 |
| 35            | 6             | 0           | -5.394368               | 0.496272  | -0.141206 |
| 36            | 6             | 0           | -3.027813               | 0.988311  | -0.650416 |
| 37            | 6             | 0           | -2.903892               | -0.432705 | -0.988729 |

Imaginary frequency: none  
 Electronic energy  $E = -4189.679158$  a.u.  
 Enthalpy  $H = -4189.644770$  a.u.  
 Entropy  $S = 209.321$  cal/mol/K  
 Gibbs free energy  $G = -4189.744226$  a.u.  
 Total free energy in solution  $E_{\text{sol}} = -4190.86545$  a.u. 1

|    |   |   |           |           |           |
|----|---|---|-----------|-----------|-----------|
| 38 | 6 | 0 | -5.221649 | -0.776468 | -0.681771 |
| 39 | 8 | 0 | -4.056043 | -1.134353 | -1.316749 |
| 40 | 8 | 0 | -4.494414 | 2.659791  | 0.174054  |
| 41 | 6 | 0 | -1.887183 | 1.780840  | -0.494699 |
| 42 | 6 | 0 | -0.555507 | 1.414939  | -0.553589 |
| 43 | 1 | 0 | -2.211108 | -0.581193 | -1.819149 |
| 44 | 1 | 0 | -2.095441 | 2.792383  | -0.156267 |
| 45 | 6 | 0 | 0.389639  | 2.342805  | -0.008129 |
| 46 | 8 | 0 | 0.213954  | 3.469515  | 0.383025  |
| 47 | 1 | 0 | -0.200954 | 0.460946  | -0.911194 |
| 48 | 8 | 0 | 1.700210  | 1.776667  | 0.204625  |
| 49 | 6 | 0 | 2.516352  | 2.629769  | 1.056789  |
| 50 | 1 | 0 | 2.803591  | 3.523860  | 0.512331  |
| 51 | 1 | 0 | 1.935277  | 2.897182  | 1.934129  |
| 52 | 1 | 0 | 3.392800  | 2.048679  | 1.316917  |
| 53 | 6 | 0 | -6.618433 | 0.816251  | 0.448789  |
| 54 | 6 | 0 | -7.644760 | -0.115083 | 0.494401  |
| 55 | 6 | 0 | -7.452600 | -1.382085 | -0.061404 |
| 56 | 6 | 0 | -6.242332 | -1.720140 | -0.653016 |
| 57 | 1 | 0 | -6.727806 | 1.814847  | 0.851257  |
| 58 | 1 | 0 | -8.592058 | 0.138714  | 0.951301  |
| 59 | 1 | 0 | -8.251824 | -2.111925 | -0.033815 |
| 60 | 1 | 0 | -6.073268 | -2.692453 | -1.095940 |

### cis-exo-TS2-VI

Standard orientation:

| Center Number | Atomic Number | Atomic Type | Coordinates (Angstroms) |           |           |
|---------------|---------------|-------------|-------------------------|-----------|-----------|
|               |               |             | X                       | Y         | Z         |
| 1             | 6             | 0           | -0.074827               | -0.646416 | 1.566199  |
| 2             | 7             | 0           | -2.068272               | -1.135080 | 0.402690  |
| 3             | 6             | 0           | -1.441244               | -0.321514 | 1.238767  |
| 4             | 6             | 0           | -2.145021               | 0.766637  | 1.989077  |
| 5             | 6             | 0           | 0.689000                | -1.466101 | 0.757423  |
| 6             | 6             | 0           | -1.448633               | -2.448593 | 0.141065  |
| 7             | 6             | 0           | 0.027828                | -2.360336 | -0.239478 |
| 8             | 1             | 0           | -1.623527               | 1.722683  | 1.908424  |
| 9             | 1             | 0           | -2.155093               | 0.450656  | 3.039106  |
| 10            | 1             | 0           | -3.175489               | 0.880242  | 1.671958  |
| 11            | 6             | 0           | 2.048137                | -1.167622 | 1.048300  |
| 12            | 6             | 0           | 2.043851                | -0.235963 | 2.116420  |
| 13            | 7             | 0           | 0.741315                | 0.075390  | 2.409856  |
| 14            | 1             | 0           | 0.440654                | 0.804697  | 3.034112  |
| 15            | 1             | 0           | -2.044918               | -2.930821 | -0.630568 |
| 16            | 1             | 0           | -1.553764               | -3.024522 | 1.062362  |
| 17            | 1             | 0           | 0.179035                | -1.986665 | -1.254165 |
| 18            | 1             | 0           | 0.454532                | -3.365958 | -0.207186 |
| 19            | 6             | 0           | 3.276896                | -1.590401 | 0.468593  |
| 20            | 6             | 0           | 4.454227                | -1.137017 | 1.051820  |
| 21            | 6             | 0           | 4.423520                | -0.244180 | 2.158647  |
| 22            | 6             | 0           | 3.243027                | 0.208660  | 2.695596  |
| 23            | 1             | 0           | 3.274361                | -2.314520 | -0.334512 |
| 24            | 1             | 0           | 3.244307                | 0.905668  | 3.523736  |
| 25            | 1             | 0           | 5.377333                | 0.086672  | 2.545095  |
| 26            | 8             | 0           | 5.684271                | -1.462290 | 0.633053  |
| 27            | 6             | 0           | 5.792960                | -2.210780 | -0.573446 |
| 28            | 1             | 0           | 5.360689                | -3.206410 | -0.449360 |
| 29            | 1             | 0           | 5.306378                | -1.678646 | -1.392767 |
| 30            | 1             | 0           | 6.856757                | -2.294574 | -0.771533 |

Imaginary frequency: -162.6235 cm<sup>-1</sup>  
 Electronic energy  $E = -4189.676742$  a.u.  
 Enthalpy  $H = -4189.643754$  a.u.  
 Entropy  $S = 201.810$  cal/mol/K  
 Gibbs free energy  $G = -4189.739641$  a.u.  
 Total free energy in solution  $E_{\text{sol}} = -4190.86193$  a.u.

|    |    |   |           |           |           |
|----|----|---|-----------|-----------|-----------|
| 31 | 6  | 0 | -4.409090 | 1.374678  | -0.596655 |
| 32 | 6  | 0 | -5.440040 | 0.349536  | -0.279434 |
| 33 | 6  | 0 | -3.086653 | 0.840366  | -0.867435 |
| 34 | 6  | 0 | -2.869614 | -0.613873 | -0.852030 |
| 35 | 6  | 0 | -5.172379 | -1.005387 | -0.467116 |
| 36 | 8  | 0 | -3.982417 | -1.435079 | -1.002517 |
| 37 | 8  | 0 | -4.672325 | 2.571415  | -0.549899 |
| 38 | 6  | 0 | -1.994396 | 1.685453  | -0.760954 |
| 39 | 6  | 0 | -0.650825 | 1.313309  | -0.724929 |
| 40 | 1  | 0 | -2.171225 | -0.915651 | -1.634791 |
| 41 | 1  | 0 | -2.233381 | 2.718048  | -0.523809 |
| 42 | 6  | 0 | 0.242212  | 2.216374  | -0.072509 |
| 43 | 8  | 0 | -0.056069 | 3.193719  | 0.583525  |
| 44 | 1  | 0 | -0.265718 | 0.410508  | -1.175568 |
| 45 | 8  | 0 | 1.620622  | 1.859544  | -0.113053 |
| 46 | 6  | 0 | 2.436315  | 2.801835  | 0.639565  |
| 47 | 1  | 0 | 2.340880  | 3.786922  | 0.193787  |
| 48 | 1  | 0 | 2.084286  | 2.830172  | 1.667056  |
| 49 | 1  | 0 | 3.455800  | 2.443470  | 0.572165  |
| 50 | 6  | 0 | -6.690176 | 0.729928  | 0.212155  |
| 51 | 6  | 0 | -7.649783 | -0.224918 | 0.510420  |
| 52 | 6  | 0 | -7.363413 | -1.577464 | 0.309026  |
| 53 | 6  | 0 | -6.126746 | -1.975399 | -0.181557 |
| 54 | 1  | 0 | -6.872925 | 1.788973  | 0.339937  |
| 55 | 1  | 0 | -8.617336 | 0.074058  | 0.891049  |
| 56 | 1  | 0 | -8.110343 | -2.327846 | 0.535313  |
| 57 | 1  | 0 | -5.886774 | -3.016131 | -0.352574 |
| 58 | 30 | 0 | 2.761935  | 0.348057  | -0.996481 |
| 59 | 17 | 0 | 1.773733  | -0.705300 | -2.662725 |
| 60 | 17 | 0 | 4.774658  | 1.231874  | -1.230493 |

**cis-exo-IM2-VI**

Standard orientation:

| Center Number | Atomic Number | Atomic Type | Coordinates (Angstroms) |           |           |
|---------------|---------------|-------------|-------------------------|-----------|-----------|
|               |               |             | X                       | Y         | Z         |
| 1             | 6             | 0           | 0.755987                | 0.220636  | -0.600547 |
| 2             | 7             | 0           | -1.357354               | 0.690460  | 0.459363  |
| 3             | 6             | 0           | -0.722504               | -0.096962 | -0.603351 |
| 4             | 6             | 0           | -1.270530               | 0.199624  | -2.011578 |
| 5             | 6             | 0           | 1.405091                | 1.027028  | 0.330047  |
| 6             | 6             | 0           | -0.776573               | 1.969150  | 0.848768  |
| 7             | 6             | 0           | 0.631214                | 1.740029  | 1.404590  |
| 8             | 1             | 0           | -0.866270               | -0.500870 | -2.745492 |
| 9             | 1             | 0           | -0.998658               | 1.215414  | -2.300360 |
| 10            | 1             | 0           | -2.352426               | 0.113739  | -2.031931 |
| 11            | 6             | 0           | 2.686595                | 1.364546  | -0.235540 |
| 12            | 6             | 0           | 2.760239                | 0.735341  | -1.489011 |
| 13            | 7             | 0           | 1.572761                | 0.063451  | -1.696783 |
| 14            | 1             | 0           | 1.382505                | -0.533165 | -2.484108 |
| 15            | 1             | 0           | -1.428154               | 2.395931  | 1.612105  |
| 16            | 1             | 0           | -0.739789               | 2.675551  | 0.010566  |
| 17            | 1             | 0           | 0.572066                | 1.161608  | 2.327571  |
| 18            | 1             | 0           | 1.114296                | 2.694805  | 1.621136  |
| 19            | 6             | 0           | 3.764108                | 2.127641  | 0.246885  |
| 20            | 6             | 0           | 4.886504                | 2.226156  | -0.553074 |
| 21            | 6             | 0           | 4.947214                | 1.581140  | -1.814030 |
| 22            | 6             | 0           | 3.902301                | 0.829061  | -2.293433 |
| 23            | 1             | 0           | 3.705941                | 2.594633  | 1.219178  |
| 24            | 1             | 0           | 3.968923                | 0.327070  | -3.249529 |

Imaginary frequency: none  
 Electronic energy  $E = -4189.730332$  a.u.  
 Enthalpy  $H = -4189.696597$  a.u.  
 Entropy  $S = 207.289$  cal/mol/K  
 Gibbs free energy  $G = -4189.795086$  a.u.  
 Total free energy in solution  $E_{\text{sol}} = -4190.90813$  a.u.

|    |    |   |           |           |           |
|----|----|---|-----------|-----------|-----------|
| 25 | 1  | 0 | 5.859567  | 1.695441  | -2.383315 |
| 26 | 8  | 0 | 6.005858  | 2.922983  | -0.227797 |
| 27 | 6  | 0 | 6.040830  | 3.524145  | 1.053206  |
| 28 | 1  | 0 | 5.259176  | 4.282298  | 1.152063  |
| 29 | 1  | 0 | 5.925041  | 2.773587  | 1.838884  |
| 30 | 1  | 0 | 7.016113  | 3.995181  | 1.137615  |
| 31 | 6  | 0 | -4.767368 | -0.920325 | 0.199795  |
| 32 | 6  | 0 | -5.492984 | 0.366467  | 0.099566  |
| 33 | 6  | 0 | -3.284924 | -0.784596 | 0.212490  |
| 34 | 6  | 0 | -2.760044 | 0.577078  | 0.579803  |
| 35 | 6  | 0 | -4.791544 | 1.553982  | -0.155278 |
| 36 | 8  | 0 | -3.432369 | 1.585914  | -0.241035 |
| 37 | 8  | 0 | -5.325990 | -2.000531 | 0.222288  |
| 38 | 6  | 0 | -2.484798 | -1.792336 | -0.130448 |
| 39 | 6  | 0 | -1.003479 | -1.568376 | -0.149552 |
| 40 | 1  | 0 | -3.046831 | 0.812685  | 1.611440  |
| 41 | 1  | 0 | -2.902968 | -2.757504 | -0.390727 |
| 42 | 6  | 0 | -0.245431 | -2.570813 | -0.967925 |
| 43 | 8  | 0 | -0.627186 | -3.147215 | -1.949880 |
| 44 | 1  | 0 | -0.637420 | -1.635559 | 0.879562  |
| 45 | 8  | 0 | 1.012016  | -2.742317 | -0.460909 |
| 46 | 6  | 0 | 1.818930  | -3.735999 | -1.149120 |
| 47 | 1  | 0 | 1.261510  | -4.667112 | -1.184924 |
| 48 | 1  | 0 | 2.033443  | -3.387814 | -2.156729 |
| 49 | 1  | 0 | 2.728438  | -3.819200 | -0.568281 |
| 50 | 6  | 0 | -6.890449 | 0.388353  | 0.156616  |
| 51 | 6  | 0 | -7.582501 | 1.571442  | -0.031711 |
| 52 | 6  | 0 | -6.871622 | 2.747301  | -0.295546 |
| 53 | 6  | 0 | -5.486224 | 2.746548  | -0.356829 |
| 54 | 1  | 0 | -7.399602 | -0.548800 | 0.340761  |
| 55 | 1  | 0 | -8.662923 | 1.587964  | 0.016603  |
| 56 | 1  | 0 | -7.406759 | 3.675692  | -0.450578 |
| 57 | 1  | 0 | -4.923484 | 3.648655  | -0.554874 |
| 58 | 30 | 0 | 1.952352  | -1.229239 | 0.920972  |
| 59 | 17 | 0 | 0.934040  | -1.543985 | 2.852383  |
| 60 | 17 | 0 | 4.030255  | -1.709468 | 0.397974  |

**cis-COM-VII**

Standard orientation:

Imaginary frequency: none

Electronic energy  $E = -3501.484007$  a.u.

Enthalpy  $H = -3501.463968$  a.u.

Entropy  $S = 150.143$  cal/mol/K

Gibbs free energy  $G = -3501.535306$  a.u.

Total free energy in solution  $E_{sol} = -3502.22559$  a.u. 1

| Center Number | Atomic Number | Atomic Type | Coordinates (Angstroms) |           |           |
|---------------|---------------|-------------|-------------------------|-----------|-----------|
|               |               |             | X                       | Y         | Z         |
| 6             | 0             | 2.922016    | -0.768036               | 0.011083  |           |
| 2             | 6             | 0           | 4.392833                | -0.661307 | 0.013994  |
| 3             | 6             | 0           | 2.219735                | 0.530762  | 0.015824  |
| 4             | 6             | 0           | 2.940698                | 1.676225  | 0.050063  |
| 5             | 6             | 0           | 5.008418                | 0.587432  | 0.035321  |
| 6             | 8             | 0           | 4.272851                | 1.748781  | 0.060704  |
| 7             | 8             | 0           | 2.333700                | -1.835161 | 0.004520  |
| 8             | 6             | 0           | 0.765486                | 0.500768  | 0.006031  |
| 9             | 6             | 0           | -0.071710               | 1.543402  | -0.119069 |
| 10            | 1             | 0           | 2.500323                | 2.663169  | 0.081353  |
| 11            | 1             | 0           | 0.343734                | -0.493933 | 0.101843  |
| 12            | 6             | 0           | -1.510466               | 1.312899  | -0.100368 |
| 13            | 8             | 0           | -2.026228               | 0.198124  | 0.037974  |
| 14            | 1             | 0           | 0.240033                | 2.570529  | -0.248697 |
| 15            | 8             | 0           | -2.212751               | 2.418852  | -0.245798 |
| 16            | 6             | 0           | -3.648469               | 2.299839  | -0.241519 |
| 17            | 1             | 0           | -3.971935               | 1.696405  | -1.090269 |
| 18            | 1             | 0           | -3.983356               | 1.876250  | 0.705927  |



|    |    |   |           |           |           |
|----|----|---|-----------|-----------|-----------|
| 19 | 1  | 0 | -4.018331 | 3.313586  | -0.345741 |
| 20 | 30 | 0 | -3.798680 | -0.678576 | 0.059309  |
| 21 | 17 | 0 | -4.431431 | -1.088056 | -1.965035 |
| 22 | 17 | 0 | -4.577275 | -0.705637 | 2.073030  |
| 23 | 6  | 0 | 5.195505  | -1.807721 | -0.005349 |
| 24 | 6  | 0 | 6.573202  | -1.691596 | -0.004410 |
| 25 | 6  | 0 | 7.167967  | -0.423171 | 0.016383  |
| 26 | 6  | 0 | 6.393298  | 0.724682  | 0.037117  |
| 27 | 1  | 0 | 4.698023  | -2.768425 | -0.021227 |
| 28 | 1  | 0 | 7.193591  | -2.577467 | -0.019914 |
| 29 | 1  | 0 | 8.246488  | -0.334351 | 0.016959  |
| 30 | 1  | 0 | 6.828157  | 1.714459  | 0.054778  |

**cis-endo-TS1-VII**

Standard orientation:

Center Atomic Atomic Coordinates (Angstroms)  
Number Number Type X Y Z

|    |   |   |           |           |           |
|----|---|---|-----------|-----------|-----------|
| 1  | 6 | 0 | 0.096503  | 1.671916  | -1.353806 |
| 2  | 7 | 0 | -2.240697 | 1.394073  | -1.060528 |
| 3  | 6 | 0 | -1.208659 | 2.182373  | -0.994568 |
| 4  | 6 | 0 | -1.338370 | 3.637537  | -0.641820 |
| 5  | 6 | 0 | 0.369301  | 0.325112  | -1.446297 |
| 6  | 6 | 0 | -2.056193 | 0.079855  | -1.713186 |
| 7  | 6 | 0 | -0.752162 | -0.663854 | -1.387133 |
| 8  | 1 | 0 | -0.599378 | 3.930845  | 0.105168  |
| 9  | 1 | 0 | -2.337352 | 3.890874  | -0.296164 |
| 10 | 1 | 0 | -1.159549 | 4.219851  | -1.551430 |
| 11 | 6 | 0 | 1.788690  | 0.202504  | -1.518111 |
| 12 | 6 | 0 | 2.314253  | 1.516601  | -1.509364 |
| 13 | 7 | 0 | 1.268643  | 2.396670  | -1.386156 |
| 14 | 1 | 0 | 1.349481  | 3.397709  | -1.362146 |
| 15 | 1 | 0 | -2.080873 | 0.292016  | -2.785570 |
| 16 | 1 | 0 | -2.922510 | -0.531838 | -1.474945 |
| 17 | 1 | 0 | -0.617257 | -1.448236 | -2.135544 |
| 18 | 1 | 0 | -0.782660 | -1.168862 | -0.419340 |
| 19 | 6 | 0 | 2.670456  | -0.911171 | -1.593457 |
| 20 | 6 | 0 | 4.030406  | -0.655144 | -1.718360 |
| 21 | 6 | 0 | 4.527454  | 0.674687  | -1.744621 |
| 22 | 6 | 0 | 3.690410  | 1.758085  | -1.645469 |
| 23 | 8 | 0 | 4.975072  | -1.606662 | -1.799841 |
| 24 | 6 | 0 | 4.568998  | -2.951959 | -1.571806 |
| 25 | 1 | 0 | 2.269817  | -1.912345 | -1.653274 |
| 26 | 1 | 0 | 5.598773  | 0.798085  | -1.816919 |
| 27 | 1 | 0 | 4.086909  | 2.765461  | -1.652878 |
| 28 | 1 | 0 | 3.908583  | -3.299210 | -2.369871 |
| 29 | 1 | 0 | 5.482323  | -3.538555 | -1.569883 |
| 30 | 1 | 0 | 4.066003  | -3.042692 | -0.607009 |
| 31 | 6 | 0 | -3.486170 | -1.036968 | 1.087339  |
| 32 | 6 | 0 | -4.781716 | -1.061742 | 0.359782  |
| 33 | 6 | 0 | -2.844819 | 0.267023  | 1.144256  |
| 34 | 6 | 0 | -3.371209 | 1.353771  | 0.377253  |
| 35 | 6 | 0 | -5.288923 | 0.099832  | -0.216463 |
| 36 | 8 | 0 | -4.629850 | 1.307377  | -0.127674 |
| 37 | 8 | 0 | -3.018716 | -2.048289 | 1.593775  |
| 38 | 6 | 0 | -1.533538 | 0.360988  | 1.652645  |
| 39 | 6 | 0 | -0.801473 | 1.515257  | 1.765183  |
| 40 | 1 | 0 | -3.163577 | 2.361180  | 0.705174  |
| 41 | 1 | 0 | -1.047715 | -0.585900 | 1.879292  |
| 42 | 6 | 0 | 0.626749  | 1.455356  | 1.859221  |

Imaginary frequency: -304.3765 cm<sup>-1</sup>

Electronic energy  $E = -4189.698130$  a.u.

Enthalpy  $H = -4189.663860$  a.u.

Entropy  $S = 208.437$  cal/mol/K

Gibbs free energy  $G = -4189.762895$  a.u.

Total free energy in solution  $E_{\text{sol}} = -4190.87627$  a.u.

|    |    |   |           |           |           |
|----|----|---|-----------|-----------|-----------|
| 43 | 8  | 0 | 1.301783  | 0.422161  | 1.730626  |
| 44 | 1  | 0 | -1.247695 | 2.499023  | 1.769363  |
| 45 | 8  | 0 | 1.213384  | 2.638591  | 2.044269  |
| 46 | 6  | 0 | 2.652377  | 2.618621  | 2.115095  |
| 47 | 1  | 0 | 2.984947  | 1.920647  | 2.879146  |
| 48 | 1  | 0 | 3.073211  | 2.311771  | 1.158688  |
| 49 | 1  | 0 | 2.938709  | 3.636700  | 2.360064  |
| 50 | 6  | 0 | -5.510095 | -2.247049 | 0.239810  |
| 51 | 6  | 0 | -6.720374 | -2.261813 | -0.435167 |
| 52 | 6  | 0 | -7.212738 | -1.082142 | -1.000223 |
| 53 | 6  | 0 | -6.501383 | 0.105548  | -0.896013 |
| 54 | 1  | 0 | -5.091679 | -3.135333 | 0.694693  |
| 55 | 1  | 0 | -7.283180 | -3.181371 | -0.524011 |
| 56 | 1  | 0 | -8.158449 | -1.088706 | -1.526690 |
| 57 | 1  | 0 | -6.861553 | 1.030554  | -1.325268 |
| 58 | 30 | 0 | 2.461924  | -0.928662 | 0.851202  |
| 59 | 17 | 0 | 4.499455  | -0.508349 | 1.588802  |
| 60 | 17 | 0 | 1.279444  | -2.798815 | 0.781348  |

### cis-endo-IM-VII

Standard orientation:

| Center Number | Atomic Number | Atomic Type | Coordinates (Angstroms) |   |   |
|---------------|---------------|-------------|-------------------------|---|---|
|               |               |             | X                       | Y | Z |

|    |   |   |           |           |           |
|----|---|---|-----------|-----------|-----------|
| 1  | 6 | 0 | 0.346643  | 1.276050  | -1.282028 |
| 2  | 7 | 0 | -2.060850 | 1.167806  | -1.354778 |
| 3  | 6 | 0 | -0.925211 | 1.944077  | -0.861477 |
| 4  | 6 | 0 | -1.009709 | 3.383425  | -1.374136 |
| 5  | 6 | 0 | 0.534730  | -0.075458 | -1.273013 |
| 6  | 6 | 0 | -1.823373 | -0.215283 | -1.834002 |
| 7  | 6 | 0 | -0.651701 | -0.981813 | -1.200072 |
| 8  | 1 | 0 | -0.250629 | 4.012318  | -0.900920 |
| 9  | 1 | 0 | -1.984871 | 3.812969  | -1.143203 |
| 10 | 1 | 0 | -0.882688 | 3.393021  | -2.456624 |
| 11 | 6 | 0 | 1.954122  | -0.289712 | -1.367779 |
| 12 | 6 | 0 | 2.555093  | 0.987776  | -1.488817 |
| 13 | 7 | 0 | 1.554177  | 1.928052  | -1.400717 |
| 14 | 1 | 0 | 1.675638  | 2.919749  | -1.511168 |
| 15 | 1 | 0 | -1.638476 | -0.151500 | -2.907920 |
| 16 | 1 | 0 | -2.754107 | -0.765578 | -1.702345 |
| 17 | 1 | 0 | -0.476731 | -1.891146 | -1.780374 |
| 18 | 1 | 0 | -0.859278 | -1.298475 | -0.177433 |
| 19 | 6 | 0 | 2.769761  | -1.452971 | -1.367791 |
| 20 | 6 | 0 | 4.135818  | -1.290175 | -1.545217 |
| 21 | 6 | 0 | 4.700596  | -0.005446 | -1.738318 |
| 22 | 6 | 0 | 3.930491  | 1.132634  | -1.711923 |
| 23 | 8 | 0 | 5.025677  | -2.304874 | -1.525276 |
| 24 | 6 | 0 | 4.541763  | -3.578086 | -1.117648 |
| 25 | 1 | 0 | 2.313324  | -2.425400 | -1.256943 |
| 26 | 1 | 0 | 5.773403  | 0.049660  | -1.858602 |
| 27 | 1 | 0 | 4.383523  | 2.108736  | -1.828542 |
| 28 | 1 | 0 | 3.849419  | -3.987418 | -1.857369 |
| 29 | 1 | 0 | 5.416138  | -4.217943 | -1.044241 |
| 30 | 1 | 0 | 4.046241  | -3.508185 | -0.146176 |
| 31 | 6 | 0 | -3.738417 | -0.488162 | 1.414479  |

Imaginary frequency: none

Electronic energy  $E = -4189.722451$  a.u.

Enthalpy  $H = -4189.688792$  a.u.

Entropy  $S = 206.252$  cal/mol/K

Gibbs free energy  $G = -4189.786789$  a.u.

Total free energy in solution  $E_{\text{sol}} = -4190.89940$  a.u.

|    |    |   |           |           |           |
|----|----|---|-----------|-----------|-----------|
| 32 | 6  | 0 | -4.909081 | -0.822300 | 0.586552  |
| 33 | 6  | 0 | -2.872469 | 0.572584  | 0.845146  |
| 34 | 6  | 0 | -3.195508 | 1.281530  | -0.444919 |
| 35 | 6  | 0 | -5.152183 | -0.145201 | -0.613784 |
| 36 | 8  | 0 | -4.363063 | 0.844378  | -1.117140 |
| 37 | 8  | 0 | -3.487923 | -1.031813 | 2.473351  |
| 38 | 6  | 0 | -1.698583 | 0.890750  | 1.395040  |
| 39 | 6  | 0 | -0.898608 | 1.994934  | 0.770980  |
| 40 | 1  | 0 | -3.343647 | 2.348811  | -0.252452 |
| 41 | 1  | 0 | -1.334048 | 0.363443  | 2.269098  |
| 42 | 6  | 0 | 0.521902  | 1.978107  | 1.268040  |
| 43 | 8  | 0 | 1.127850  | 0.952416  | 1.543035  |
| 44 | 1  | 0 | -1.337341 | 2.960296  | 1.043387  |
| 45 | 8  | 0 | 1.064773  | 3.175470  | 1.373136  |
| 46 | 6  | 0 | 2.454875  | 3.188591  | 1.788670  |
| 47 | 1  | 0 | 2.553531  | 2.699738  | 2.754090  |
| 48 | 1  | 0 | 3.060163  | 2.650782  | 1.062213  |
| 49 | 1  | 0 | 2.721942  | 4.238299  | 1.843235  |
| 50 | 6  | 0 | -5.789971 | -1.828576 | 1.001670  |
| 51 | 6  | 0 | -6.895127 | -2.158561 | 0.240930  |
| 52 | 6  | 0 | -7.127854 | -1.471921 | -0.956250 |
| 53 | 6  | 0 | -6.268995 | -0.473443 | -1.385410 |
| 54 | 1  | 0 | -5.566143 | -2.329509 | 1.934518  |
| 55 | 1  | 0 | -7.572181 | -2.937162 | 0.564670  |
| 56 | 1  | 0 | -7.990912 | -1.720567 | -1.560878 |
| 57 | 1  | 0 | -6.435504 | 0.065474  | -2.307970 |
| 58 | 30 | 0 | 2.322938  | -0.659657 | 0.986881  |
| 59 | 17 | 0 | 4.275486  | 0.039780  | 1.741031  |
| 60 | 17 | 0 | 1.172705  | -2.479569 | 1.460944  |

**cis-exo-TS1-VII**

Standard orientation:

Imaginary frequency: -251.3803 cm<sup>-1</sup>

Electronic energy  $E = -4189.695484$  a.u.

Enthalpy  $H = -4189.661216$  a.u.

Entropy  $S = 213.925$  cal/mol/K

Gibbs free energy  $G = -4189.762859$  a.u.

Total free energy in solution  $E_{\text{sol}} = -4190.87712$  a.u.

| Center Number | Atomic Number | Atomic Type | Coordinates (Angstroms) |           |           |
|---------------|---------------|-------------|-------------------------|-----------|-----------|
|               |               |             | X                       | Y         | Z         |
| 1             | 6             | 0           | -4.053932               | 1.207316  | -0.588390 |
| 2             | 6             | 0           | -5.202533               | 0.407308  | -0.091130 |
| 3             | 6             | 0           | -2.972338               | 0.416504  | -1.151456 |
| 4             | 6             | 0           | -3.073808               | -1.004689 | -1.169260 |
| 5             | 8             | 0           | -4.264703               | -1.623468 | -1.006653 |
| 6             | 8             | 0           | -4.028974               | 2.427131  | -0.479959 |
| 7             | 6             | 0           | -1.731541               | 1.034956  | -1.381327 |
| 8             | 6             | 0           | -0.552746               | 0.399577  | -1.686438 |
| 9             | 1             | 0           | -2.500764               | -1.534670 | -1.921673 |
| 10            | 1             | 0           | -1.705472               | 2.102351  | -1.182959 |
| 11            | 6             | 0           | 0.695660                | 1.048161  | -1.489466 |
| 12            | 8             | 0           | 0.838039                | 2.240824  | -1.123924 |
| 13            | 1             | 0           | -0.494381               | -0.647835 | -1.940224 |
| 14            | 8             | 0           | 1.745609                | 0.251256  | -1.675177 |
| 15            | 6             | 0           | 3.042031                | 0.767697  | -1.357317 |
| 16            | 1             | 0           | 3.246229                | 1.681711  | -1.914024 |
| 17            | 1             | 0           | 3.124079                | 0.925836  | -0.278387 |
| 18            | 1             | 0           | 3.740627                | -0.014751 | -1.635998 |
| 19            | 6             | 0           | -5.252780               | -0.967855 | -0.305602 |
| 20            | 6             | 0           | -6.253609               | 1.019052  | 0.596428  |
| 21            | 6             | 0           | -7.323284               | 0.267629  | 1.054970  |
| 22            | 6             | 0           | -7.353695               | -1.110737 | 0.822295  |
| 23            | 6             | 0           | -6.320956               | -1.737483 | 0.139353  |
| 24            | 1             | 0           | -6.323287               | -2.801236 | -0.055345 |
| 25            | 1             | 0           | -8.189323               | -1.700232 | 1.177035  |

|    |    |   |           |           |           |
|----|----|---|-----------|-----------|-----------|
| 26 | 1  | 0 | -8.134854 | 0.744198  | 1.588416  |
| 27 | 1  | 0 | -6.194098 | 2.088995  | 0.747270  |
| 28 | 30 | 0 | 2.046686  | 3.135308  | 0.087271  |
| 29 | 17 | 0 | 1.747450  | 2.364673  | 2.133943  |
| 30 | 17 | 0 | 3.440830  | 4.553234  | -0.750276 |
| 31 | 6  | 0 | 0.209501  | -1.486464 | 0.986853  |
| 32 | 7  | 0 | -1.989369 | -1.768029 | 0.159986  |
| 33 | 6  | 0 | -1.158964 | -1.048847 | 0.856948  |
| 34 | 6  | 0 | -1.601080 | 0.195103  | 1.564230  |
| 35 | 6  | 0 | 0.753447  | -2.487024 | 0.205411  |
| 36 | 6  | 0 | -1.572883 | -3.121782 | -0.232230 |
| 37 | 6  | 0 | -0.127174 | -3.253511 | -0.728820 |
| 38 | 1  | 0 | -1.077460 | 1.081811  | 1.201481  |
| 39 | 1  | 0 | -1.345873 | 0.074674  | 2.621610  |
| 40 | 1  | 0 | -2.674306 | 0.334796  | 1.486349  |
| 41 | 6  | 0 | 2.160128  | -2.444444 | 0.401629  |
| 42 | 6  | 0 | 2.401522  | -1.398836 | 1.325799  |
| 43 | 7  | 0 | 1.203435  | -0.838472 | 1.680541  |
| 44 | 1  | 0 | 1.118566  | 0.046632  | 2.163897  |
| 45 | 1  | 0 | -2.287436 | -3.484366 | -0.971928 |
| 46 | 1  | 0 | -1.686531 | -3.741280 | 0.661642  |
| 47 | 1  | 0 | -0.006645 | -2.878361 | -1.751900 |
| 48 | 1  | 0 | 0.127705  | -4.315297 | -0.753007 |
| 49 | 6  | 0 | 3.239451  | -3.179589 | -0.137111 |
| 50 | 6  | 0 | 4.515456  | -2.838268 | 0.262796  |
| 51 | 6  | 0 | 4.740096  | -1.783306 | 1.188505  |
| 52 | 6  | 0 | 3.703780  | -1.062102 | 1.730638  |
| 53 | 8  | 0 | 5.652476  | -3.448900 | -0.169379 |
| 54 | 6  | 0 | 5.502852  | -4.506765 | -1.095761 |
| 55 | 1  | 0 | 6.506967  | -4.855928 | -1.319901 |
| 56 | 1  | 0 | 5.022170  | -4.158947 | -2.014409 |
| 57 | 1  | 0 | 4.917643  | -5.324593 | -0.666424 |
| 58 | 1  | 0 | 3.053182  | -3.979378 | -0.839313 |
| 59 | 1  | 0 | 5.766887  | -1.570945 | 1.454753  |
| 60 | 1  | 0 | 3.881394  | -0.255668 | 2.430318  |

**cis-exo-IM1-VII**

Standard orientation:

| Center Number | Atomic Number | Atomic Type | Coordinates (Angstroms) |           |           |
|---------------|---------------|-------------|-------------------------|-----------|-----------|
|               |               |             | X                       | Y         | Z         |
| 1             | 6             | 0           | -4.017921               | 1.204116  | -0.656772 |
| 2             | 6             | 0           | -5.102224               | 0.383619  | -0.048572 |
| 3             | 6             | 0           | -2.913115               | 0.442328  | -1.204431 |
| 4             | 6             | 0           | -2.946363               | -1.043616 | -1.178263 |
| 5             | 8             | 0           | -4.190400               | -1.653604 | -0.983246 |
| 6             | 8             | 0           | -4.057826               | 2.429013  | -0.617333 |
| 7             | 6             | 0           | -1.728630               | 1.086956  | -1.500522 |
| 8             | 6             | 0           | -0.521897               | 0.468297  | -1.831870 |
| 9             | 1             | 0           | -2.583698               | -1.442330 | -2.127545 |
| 10            | 1             | 0           | -1.729584               | 2.162260  | -1.346618 |
| 11            | 6             | 0           | 0.707547                | 1.105181  | -1.629347 |
| 12            | 8             | 0           | 0.866469                | 2.301972  | -1.246394 |
| 13            | 1             | 0           | -0.464624               | -0.573393 | -2.110014 |
| 14            | 8             | 0           | 1.774913                | 0.311741  | -1.832447 |
| 15            | 6             | 0           | 3.055396                | 0.819023  | -1.462195 |
| 16            | 1             | 0           | 3.259684                | 1.776655  | -1.938956 |
| 17            | 1             | 0           | 3.130644                | 0.897465  | -0.371882 |
| 18            | 1             | 0           | 3.772184                | 0.073573  | -1.793435 |
| 19            | 6             | 0           | -5.123086               | -1.000911 | -0.212701 |

Imaginary frequency: none  
 Electronic energy  $E = -4189.698841$  a.u.  
 Enthalpy  $H = -4189.664712$  a.u.  
 Entropy  $S = 213.407$  cal/mol/K  
 Gibbs free energy  $G = -4189.766109$  a.u.  
 Total free energy in solution  $E_{\text{sol}} = -4190.88566$  a.u.

|    |    |   |           |           |           |
|----|----|---|-----------|-----------|-----------|
| 20 | 6  | 0 | -6.112846 | 0.990783  | 0.699506  |
| 21 | 6  | 0 | -7.123523 | 0.230541  | 1.267653  |
| 22 | 6  | 0 | -7.130590 | -1.153985 | 1.084068  |
| 23 | 6  | 0 | -6.133750 | -1.776769 | 0.343967  |
| 24 | 1  | 0 | -6.124213 | -2.846381 | 0.183414  |
| 25 | 1  | 0 | -7.919109 | -1.753507 | 1.521017  |
| 26 | 1  | 0 | -7.904695 | 0.705651  | 1.845920  |
| 27 | 1  | 0 | -6.073687 | 2.067137  | 0.805585  |
| 28 | 30 | 0 | 1.985451  | 3.077439  | 0.096312  |
| 29 | 17 | 0 | 1.469034  | 2.274232  | 2.102251  |
| 30 | 17 | 0 | 3.552007  | 4.454020  | -0.469220 |
| 31 | 6  | 0 | 0.111792  | -1.512941 | 0.906658  |
| 32 | 7  | 0 | -1.944488 | -1.676383 | -0.206201 |
| 33 | 6  | 0 | -1.201294 | -1.014920 | 0.661564  |
| 34 | 6  | 0 | -1.674443 | 0.185098  | 1.418714  |
| 35 | 6  | 0 | 0.728794  | -2.466564 | 0.106644  |
| 36 | 6  | 0 | -1.543403 | -3.052812 | -0.556718 |
| 37 | 6  | 0 | -0.066658 | -3.184573 | -0.933117 |
| 38 | 1  | 0 | -1.216280 | 1.102095  | 1.042949  |
| 39 | 1  | 0 | -1.350833 | 0.055165  | 2.454619  |
| 40 | 1  | 0 | -2.754908 | 0.277674  | 1.401307  |
| 41 | 6  | 0 | 2.109431  | -2.429836 | 0.409943  |
| 42 | 6  | 0 | 2.268998  | -1.436143 | 1.408799  |
| 43 | 7  | 0 | 1.047641  | -0.913452 | 1.722261  |
| 44 | 1  | 0 | 0.942598  | -0.009257 | 2.170505  |
| 45 | 1  | 0 | -2.205692 | -3.389486 | -1.351091 |
| 46 | 1  | 0 | -1.734712 | -3.665528 | 0.326722  |
| 47 | 1  | 0 | 0.150160  | -2.765228 | -1.921439 |
| 48 | 1  | 0 | 0.178005  | -4.247995 | -0.974055 |
| 49 | 6  | 0 | 3.233923  | -3.123524 | -0.096612 |
| 50 | 6  | 0 | 4.472286  | -2.783776 | 0.401601  |
| 51 | 6  | 0 | 4.616732  | -1.771395 | 1.394852  |
| 52 | 6  | 0 | 3.539485  | -1.096224 | 1.908897  |
| 53 | 8  | 0 | 5.646197  | -3.347697 | 0.017060  |
| 54 | 6  | 0 | 5.583339  | -4.355522 | -0.974397 |
| 55 | 1  | 0 | 6.607874  | -4.672367 | -1.147096 |
| 56 | 1  | 0 | 5.158452  | -3.964585 | -1.902710 |
| 57 | 1  | 0 | 4.988903  | -5.206004 | -0.630112 |
| 58 | 1  | 0 | 3.106686  | -3.884649 | -0.852461 |
| 59 | 1  | 0 | 5.621821  | -1.555101 | 1.731390  |
| 60 | 1  | 0 | 3.659010  | -0.322455 | 2.655464  |

### cis-exo-TS2-VII

Standard orientation:

| Center Number | Atomic Number | Atomic Type | Coordinates (Angstroms) |           |           |
|---------------|---------------|-------------|-------------------------|-----------|-----------|
|               |               |             | X                       | Y         | Z         |
| 1             | 6             | 0           | -4.325281               | 0.790717  | -0.858006 |
| 2             | 6             | 0           | -5.440699               | 0.003501  | -0.276338 |
| 3             | 6             | 0           | -3.014283               | 0.124250  | -0.879784 |
| 4             | 6             | 0           | -2.956393               | -1.316488 | -0.429882 |
| 5             | 8             | 0           | -3.888222               | -1.613431 | 0.613402  |
| 6             | 8             | 0           | -4.504829               | 1.915761  | -1.300840 |
| 7             | 6             | 0           | -1.925645               | 0.846424  | -1.261658 |
| 8             | 6             | 0           | -0.604638               | 0.333559  | -1.404198 |
| 9             | 1             | 0           | -3.181114               | -1.980237 | -1.271538 |
| 10            | 1             | 0           | -2.089028               | 1.911962  | -1.396461 |
| 11            | 6             | 0           | 0.526432                | 1.155978  | -1.288187 |
| 12            | 8             | 0           | 0.510657                | 2.340011  | -0.845900 |
| 13            | 1             | 0           | -0.423528               | -0.648389 | -1.807984 |

Imaginary frequency: -197.2077 cm<sup>-1</sup>  
 Electronic energy  $E = -4189.694765$  a.u.  
 Enthalpy  $H = -4189.661019$  a.u.  
 Entropy  $S = 209.945$  cal/mol/K  
 Gibbs free energy  $G = -4189.760771$  a.u.  
 Total free energy in solution  $E_{\text{sol}} = -4190.87752$  a.u.

|    |    |   |           |           |           |
|----|----|---|-----------|-----------|-----------|
| 14 | 8  | 0 | 1.678226  | 0.556143  | -1.618452 |
| 15 | 6  | 0 | 2.893873  | 1.267279  | -1.389296 |
| 16 | 1  | 0 | 2.888112  | 2.231347  | -1.898874 |
| 17 | 1  | 0 | 3.068829  | 1.382634  | -0.315278 |
| 18 | 1  | 0 | 3.680105  | 0.636871  | -1.792699 |
| 19 | 6  | 0 | -5.172596 | -1.169341 | 0.428822  |
| 20 | 6  | 0 | -6.759104 | 0.448007  | -0.388130 |
| 21 | 6  | 0 | -7.792591 | -0.271710 | 0.190686  |
| 22 | 6  | 0 | -7.505605 | -1.442479 | 0.897209  |
| 23 | 6  | 0 | -6.199283 | -1.898230 | 1.020438  |
| 24 | 1  | 0 | -5.957267 | -2.799497 | 1.567089  |
| 25 | 1  | 0 | -8.308281 | -2.006378 | 1.355449  |
| 26 | 1  | 0 | -8.814312 | 0.072118  | 0.101613  |
| 27 | 1  | 0 | -6.933865 | 1.367763  | -0.930830 |
| 28 | 30 | 0 | 1.723921  | 3.380814  | 0.217524  |
| 29 | 17 | 0 | 1.914674  | 2.463455  | 2.227754  |
| 30 | 17 | 0 | 2.686042  | 5.098228  | -0.666094 |
| 31 | 6  | 0 | 0.577569  | -1.357968 | 0.710473  |
| 32 | 7  | 0 | -1.657140 | -1.756001 | 0.070729  |
| 33 | 6  | 0 | -0.781255 | -0.906888 | 0.635150  |
| 34 | 6  | 0 | -1.230838 | 0.188802  | 1.555639  |
| 35 | 6  | 0 | 1.079983  | -2.425082 | -0.010977 |
| 36 | 6  | 0 | -1.245146 | -3.147950 | -0.194591 |
| 37 | 6  | 0 | 0.144961  | -3.263779 | -0.821787 |
| 38 | 1  | 0 | -0.604426 | 1.074893  | 1.457539  |
| 39 | 1  | 0 | -1.117484 | -0.206735 | 2.570427  |
| 40 | 1  | 0 | -2.271176 | 0.454434  | 1.413000  |
| 41 | 6  | 0 | 2.488280  | -2.411198 | 0.160015  |
| 42 | 6  | 0 | 2.774332  | -1.310992 | 1.006557  |
| 43 | 7  | 0 | 1.601372  | -0.688744 | 1.335291  |
| 44 | 1  | 0 | 1.538413  | 0.190381  | 1.837455  |
| 45 | 1  | 0 | -2.006340 | -3.599554 | -0.826614 |
| 46 | 1  | 0 | -1.242756 | -3.671638 | 0.764561  |
| 47 | 1  | 0 | 0.138715  | -2.935842 | -1.867353 |
| 48 | 1  | 0 | 0.435956  | -4.316261 | -0.816179 |
| 49 | 6  | 0 | 3.536364  | -3.222408 | -0.329899 |
| 50 | 6  | 0 | 4.825672  | -2.898821 | 0.036895  |
| 51 | 6  | 0 | 5.095466  | -1.788569 | 0.883591  |
| 52 | 6  | 0 | 4.091240  | -0.992879 | 1.378022  |
| 53 | 8  | 0 | 5.936609  | -3.577668 | -0.357534 |
| 54 | 6  | 0 | 5.740230  | -4.701102 | -1.193501 |
| 55 | 1  | 0 | 6.728386  | -5.107518 | -1.390218 |
| 56 | 1  | 0 | 5.268929  | -4.410751 | -2.136532 |
| 57 | 1  | 0 | 5.125139  | -5.456284 | -0.696436 |
| 58 | 1  | 0 | 3.317219  | -4.060748 | -0.975250 |
| 59 | 1  | 0 | 6.131460  | -1.595555 | 1.127777  |
| 60 | 1  | 0 | 4.303078  | -0.149153 | 2.022264  |

**cis-exo-IM2-VII**

Standard orientation:

| Center Number | Atomic Number | Atomic Type | Coordinates (Angstroms) |           |           |
|---------------|---------------|-------------|-------------------------|-----------|-----------|
|               |               |             | X                       | Y         | Z         |
| 1             | 6             | 0           | 4.454185                | -0.004971 | 1.143847  |
| 2             | 6             | 0           | 5.278373                | -0.828829 | 0.232909  |
| 3             | 6             | 0           | 2.996494                | -0.306726 | 1.077485  |
| 4             | 6             | 0           | 2.641457                | -1.659200 | 0.527907  |
| 5             | 8             | 0           | 3.316994                | -1.844759 | -0.756340 |
| 6             | 8             | 0           | 4.907609                | 0.874438  | 1.851502  |
| 7             | 6             | 0           | 2.079026                | 0.589117  | 1.432722  |

Imaginary frequency: none

Electronic energy  $E = -4189.726393$  a.u.

Enthalpy  $H = -4189.692670$  a.u.

Entropy  $S = 211.313$  cal/mol/K

Gibbs free energy  $G = -4189.793072$  a.u.

Total free energy in solution  $E_{\text{sol}} = -4190.91038$  a.u.

|    |    |   |           |           |           |
|----|----|---|-----------|-----------|-----------|
| 8  | 6  | 0 | 0.618048  | 0.264301  | 1.261469  |
| 9  | 1  | 0 | 3.059030  | -2.436615 | 1.179852  |
| 10 | 1  | 0 | 2.396017  | 1.547800  | 1.827970  |
| 11 | 6  | 0 | -0.233345 | 1.491435  | 1.165926  |
| 12 | 8  | 0 | -0.027069 | 2.386602  | 0.340342  |
| 13 | 1  | 0 | 0.255846  | -0.308293 | 2.117170  |
| 14 | 8  | 0 | -1.209917 | 1.523408  | 2.035098  |
| 15 | 6  | 0 | -2.157328 | 2.605336  | 1.945024  |
| 16 | 1  | 0 | -1.646287 | 3.564428  | 2.023652  |
| 17 | 1  | 0 | -2.714098 | 2.511833  | 1.010894  |
| 18 | 1  | 0 | -2.828966 | 2.465694  | 2.784106  |
| 19 | 6  | 0 | 4.665917  | -1.676261 | -0.703457 |
| 20 | 6  | 0 | 6.670580  | -0.685610 | 0.229228  |
| 21 | 6  | 0 | 7.444987  | -1.374200 | -0.686544 |
| 22 | 6  | 0 | 6.821371  | -2.206304 | -1.623254 |
| 23 | 6  | 0 | 5.444026  | -2.362652 | -1.636350 |
| 24 | 1  | 0 | 4.949205  | -3.006397 | -2.350777 |
| 25 | 1  | 0 | 7.420396  | -2.742673 | -2.348423 |
| 26 | 1  | 0 | 8.521004  | -1.264823 | -0.686756 |
| 27 | 1  | 0 | 7.107401  | -0.012274 | 0.955386  |
| 28 | 30 | 0 | -1.046021 | 3.809494  | -0.585171 |
| 29 | 17 | 0 | -2.297866 | 2.728992  | -2.002101 |
| 30 | 17 | 0 | -0.745546 | 5.782100  | 0.202472  |
| 31 | 6  | 0 | -0.981758 | -1.136286 | -0.063144 |
| 32 | 7  | 0 | 1.250592  | -1.856482 | 0.417912  |
| 33 | 6  | 0 | 0.447936  | -0.690696 | 0.021907  |
| 34 | 6  | 0 | 0.882297  | -0.064009 | -1.313683 |
| 35 | 6  | 0 | -1.460152 | -2.381459 | 0.225642  |
| 36 | 6  | 0 | 0.826820  | -3.169594 | -0.065795 |
| 37 | 6  | 0 | -0.537971 | -3.521433 | 0.525981  |
| 38 | 1  | 0 | 0.195433  | 0.721726  | -1.629250 |
| 39 | 1  | 0 | 0.874820  | -0.846214 | -2.073551 |
| 40 | 1  | 0 | 1.884635  | 0.354970  | -1.261051 |
| 41 | 6  | 0 | -2.888611 | -2.323614 | 0.067383  |
| 42 | 6  | 0 | -3.195312 | -1.008761 | -0.332434 |
| 43 | 7  | 0 | -2.018620 | -0.279113 | -0.378483 |
| 44 | 1  | 0 | -1.932289 | 0.562537  | -0.934319 |
| 45 | 1  | 0 | 1.588385  | -3.885786 | 0.247193  |
| 46 | 1  | 0 | 0.775169  | -3.197130 | -1.160281 |
| 47 | 1  | 0 | -0.438875 | -3.696977 | 1.601217  |
| 48 | 1  | 0 | -0.909632 | -4.443824 | 0.072155  |
| 49 | 6  | 0 | -3.915724 | -3.272763 | 0.216560  |
| 50 | 6  | 0 | -5.213715 | -2.872985 | -0.055185 |
| 51 | 6  | 0 | -5.501728 | -1.554498 | -0.473357 |
| 52 | 6  | 0 | -4.505035 | -0.612412 | -0.615765 |
| 53 | 8  | 0 | -6.307944 | -3.682743 | 0.049032  |
| 54 | 6  | 0 | -6.084153 | -5.016952 | 0.454009  |
| 55 | 1  | 0 | -7.060156 | -5.494922 | 0.474447  |
| 56 | 1  | 0 | -5.636955 | -5.057173 | 1.451462  |
| 57 | 1  | 0 | -5.435439 | -5.541055 | -0.253790 |
| 58 | 1  | 0 | -3.682361 | -4.279102 | 0.534071  |
| 59 | 1  | 0 | -6.535547 | -1.310888 | -0.677802 |
| 60 | 1  | 0 | -4.729388 | 0.395531  | -0.942011 |

## 5.2.2 *trans-2a* as diene

### **trans-endo-TS-I**

Standard orientation:

Imaginary frequency: -344.2917 cm<sup>-1</sup>

Electronic energy  $E = -4189.680077$  a.u.

Enthalpy  $H = -4189.645642$  a.u.

Center Atomic Atomic Coordinates (Angstroms) Entropy  $S = 213.921$  cal/mol/K

| Number | Number | Type | X         | Y         | Z         | Gibbs free energy $G = -4189.747282$ a.u.                         |
|--------|--------|------|-----------|-----------|-----------|-------------------------------------------------------------------|
| -----  |        |      |           |           |           | Total free energy in solution $E_{\text{sol}} = -4190.86113$ a.u. |
| 1      | 6      | 0    | 0.635509  | 0.643973  | -0.965506 |                                                                   |
| 2      | 7      | 0    | -1.649291 | 0.088898  | -1.313511 |                                                                   |
| 3      | 6      | 0    | -0.630832 | 0.837172  | -1.657272 |                                                                   |
| 4      | 6      | 0    | -0.644748 | 1.659804  | -2.914604 |                                                                   |
| 5      | 6      | 0    | 0.804558  | -0.227615 | 0.105590  |                                                                   |
| 6      | 6      | 0    | -1.430492 | -1.057771 | -0.407392 |                                                                   |
| 7      | 6      | 0    | -0.410321 | -0.862007 | 0.718360  |                                                                   |
| 8      | 1      | 0    | -0.147038 | 2.620723  | -2.779307 |                                                                   |
| 9      | 1      | 0    | -1.658556 | 1.818767  | -3.277539 |                                                                   |
| 10     | 1      | 0    | -0.110152 | 1.085865  | -3.679039 |                                                                   |
| 11     | 6      | 0    | 2.166619  | -0.047852 | 0.551262  |                                                                   |
| 12     | 6      | 0    | 2.743974  | 0.923132  | -0.304818 |                                                                   |
| 13     | 7      | 0    | 1.782712  | 1.335636  | -1.190526 |                                                                   |
| 14     | 1      | 0    | 1.914020  | 2.030968  | -1.907911 |                                                                   |
| 15     | 1      | 0    | -1.083485 | -1.871969 | -1.053976 |                                                                   |
| 16     | 1      | 0    | -2.396339 | -1.356357 | -0.009076 |                                                                   |
| 17     | 1      | 0    | -0.185167 | -1.838597 | 1.148475  |                                                                   |
| 18     | 1      | 0    | -0.805205 | -0.222608 | 1.512758  |                                                                   |
| 19     | 6      | 0    | 2.943060  | -0.663345 | 1.562011  |                                                                   |
| 20     | 6      | 0    | 4.266548  | -0.281060 | 1.675147  |                                                                   |
| 21     | 6      | 0    | 4.825638  | 0.700791  | 0.812350  |                                                                   |
| 22     | 6      | 0    | 4.087648  | 1.304432  | -0.176456 |                                                                   |
| 23     | 8      | 0    | 5.133901  | -0.788754 | 2.580075  |                                                                   |
| 24     | 6      | 0    | 4.663321  | -1.846655 | 3.402614  |                                                                   |
| 25     | 1      | 0    | 2.498741  | -1.419237 | 2.192205  |                                                                   |
| 26     | 1      | 0    | 5.870141  | 0.942453  | 0.953579  |                                                                   |
| 27     | 1      | 0    | 4.530709  | 2.034088  | -0.840946 |                                                                   |
| 28     | 1      | 0    | 4.322428  | -2.687389 | 2.793664  |                                                                   |
| 29     | 1      | 0    | 5.509943  | -2.149835 | 4.011197  |                                                                   |
| 30     | 1      | 0    | 3.850382  | -1.504823 | 4.047789  |                                                                   |
| 31     | 30     | 0    | 2.009779  | -1.796184 | -1.023848 |                                                                   |
| 32     | 17     | 0    | 1.644455  | -3.668991 | 0.022632  |                                                                   |
| 33     | 17     | 0    | 2.686698  | -1.242721 | -3.012828 |                                                                   |
| 34     | 6      | 0    | -3.566975 | 0.604106  | 1.476333  |                                                                   |
| 35     | 6      | 0    | -4.590314 | -0.380335 | 1.052037  |                                                                   |
| 36     | 6      | 0    | -2.969253 | 1.370661  | 0.393473  |                                                                   |
| 37     | 6      | 0    | -3.179280 | 0.966798  | -0.963462 |                                                                   |
| 38     | 6      | 0    | -4.858018 | -0.573827 | -0.301665 |                                                                   |
| 39     | 8      | 0    | -4.198369 | 0.123777  | -1.286744 |                                                                   |
| 40     | 8      | 0    | -3.264841 | 0.750544  | 2.656350  |                                                                   |
| 41     | 6      | 0    | -1.933545 | 2.278905  | 0.696923  |                                                                   |
| 42     | 6      | 0    | -1.245102 | 2.995075  | -0.241328 |                                                                   |
| 43     | 1      | 0    | -3.081167 | 1.705309  | -1.746159 |                                                                   |
| 44     | 1      | 0    | -1.611842 | 2.300187  | 1.732777  |                                                                   |
| 45     | 6      | 0    | 0.041579  | 3.642467  | -0.010924 |                                                                   |
| 46     | 8      | 0    | 0.726948  | 4.106953  | -0.909165 |                                                                   |
| 47     | 1      | 0    | -1.633122 | 3.154073  | -1.235261 |                                                                   |
| 48     | 8      | 0    | 0.448140  | 3.610236  | 1.267745  |                                                                   |
| 49     | 6      | 0    | 1.747241  | 4.161702  | 1.505396  |                                                                   |
| 50     | 1      | 0    | 2.506867  | 3.562188  | 1.004426  |                                                                   |
| 51     | 1      | 0    | 1.796099  | 5.185524  | 1.140309  |                                                                   |
| 52     | 1      | 0    | 1.885531  | 4.126741  | 2.581507  |                                                                   |
| 53     | 6      | 0    | -5.296972 | -1.130720 | 1.995124  |                                                                   |
| 54     | 6      | 0    | -6.254994 | -2.044813 | 1.589256  |                                                                   |
| 55     | 6      | 0    | -6.511616 | -2.218099 | 0.225643  |                                                                   |
| 56     | 6      | 0    | -5.815779 | -1.487813 | -0.727260 |                                                                   |
| 57     | 1      | 0    | -5.065377 | -0.963924 | 3.038908  |                                                                   |
| 58     | 1      | 0    | -6.802560 | -2.622876 | 2.321423  |                                                                   |
| 59     | 1      | 0    | -7.258971 | -2.931590 | -0.096906 |                                                                   |
| 60     | 1      | 0    | -5.993726 | -1.609485 | -1.786941 |                                                                   |



-----  
**trans-endo-IM-I**

Standard orientation:

Imaginary frequency: none  $\text{cm}^{-1}$   
Electronic energy  $E = -4189.713118$  a.u.  
Enthalpy  $H = -4189.679399$  a.u.  
Entropy  $S = 209.646$  cal/mol/K  
Gibbs free energy  $G = -4189.779008$  a.u.  
Total free energy in solution  $E_{\text{sol}} = -4190.89299$  a.u.

-----

| Center Number | Atomic Number | Atomic Type | Coordinates (Angstroms) |           |           |
|---------------|---------------|-------------|-------------------------|-----------|-----------|
|               |               |             | X                       | Y         | Z         |
| 6             | 0             | -0.771201   | 0.840929                | 0.592082  |           |
| 2             | 7             | 0           | 1.481567                | 0.071763  | 1.009635  |
| 3             | 6             | 0           | 0.580263                | 1.224853  | 1.116219  |
| 4             | 6             | 0           | 0.458082                | 1.644711  | 2.586075  |
| 5             | 6             | 0           | -0.991806               | -0.071581 | -0.417460 |
| 6             | 6             | 0           | 1.211697                | -1.008737 | 0.024099  |
| 7             | 6             | 0           | 0.193663                | -0.697181 | -1.079529 |
| 8             | 1             | 0           | -0.092217               | 2.585587  | 2.669699  |
| 9             | 1             | 0           | 1.444264                | 1.802735  | 3.022417  |
| 10            | 1             | 0           | -0.049707               | 0.861106  | 3.148841  |
| 11            | 6             | 0           | -2.413733               | -0.020282 | -0.710647 |
| 12            | 6             | 0           | -2.963799               | 0.936746  | 0.169621  |
| 13            | 7             | 0           | -1.934316               | 1.475611  | 0.913328  |
| 14            | 1             | 0           | -2.071788               | 1.996256  | 1.764534  |
| 15            | 1             | 0           | 0.854899                | -1.883200 | 0.574514  |
| 16            | 1             | 0           | 2.159644                | -1.298178 | -0.428936 |
| 17            | 1             | 0           | -0.068214               | -1.630794 | -1.578306 |
| 18            | 1             | 0           | 0.601050                | -0.006414 | -1.822019 |
| 19            | 6             | 0           | -3.245652               | -0.743643 | -1.592971 |
| 20            | 6             | 0           | -4.604255               | -0.485443 | -1.549791 |
| 21            | 6             | 0           | -5.139715               | 0.478802  | -0.657448 |
| 22            | 6             | 0           | -4.340604               | 1.190536  | 0.205950  |
| 23            | 8             | 0           | -5.525202               | -1.111987 | -2.319724 |
| 24            | 6             | 0           | -5.064258               | -2.178603 | -3.135364 |
| 25            | 1             | 0           | -2.816268               | -1.488657 | -2.245862 |
| 26            | 1             | 0           | -6.211704               | 0.620287  | -0.668634 |
| 27            | 1             | 0           | -4.764859               | 1.904811  | 0.899119  |
| 28            | 1             | 0           | -4.576375               | -2.945783 | -2.529001 |
| 29            | 1             | 0           | -5.947799               | -2.591502 | -3.613202 |
| 30            | 1             | 0           | -4.371296               | -1.815233 | -3.898147 |
| 31            | 30            | 0           | -1.935882               | -1.604061 | 0.978774  |
| 32            | 17            | 0           | -1.634949               | -3.533139 | 0.009969  |
| 33            | 17            | 0           | -2.512620               | -0.965476 | 2.980220  |
| 34            | 6             | 0           | 4.192832                | 0.817933  | -1.308668 |
| 35            | 6             | 0           | 5.036444                | -0.281249 | -0.811968 |
| 36            | 6             | 0           | 3.090312                | 1.199632  | -0.394626 |
| 37            | 6             | 0           | 2.865132                | 0.525066  | 0.935498  |
| 38            | 6             | 0           | 4.751120                | -0.905779 | 0.408302  |
| 39            | 8             | 0           | 3.707404                | -0.579701 | 1.217896  |
| 40            | 8             | 0           | 4.369907                | 1.369660  | -2.380084 |
| 41            | 6             | 0           | 2.182098                | 2.118602  | -0.730586 |
| 42            | 6             | 0           | 1.123228                | 2.491345  | 0.262237  |
| 43            | 1             | 0           | 3.020182                | 1.242656  | 1.746025  |
| 44            | 1             | 0           | 2.217754                | 2.605517  | -1.697573 |
| 45            | 6             | 0           | -0.010980               | 3.223801  | -0.414495 |
| 46            | 8             | 0           | -0.351893               | 3.046935  | -1.557300 |
| 47            | 1             | 0           | 1.561333                | 3.166707  | 1.004751  |
| 48            | 8             | 0           | -0.620510               | 4.078637  | 0.422993  |
| 49            | 6             | 0           | -1.771851               | 4.729813  | -0.139252 |
| 50            | 1             | 0           | -1.480998               | 5.313098  | -1.009915 |
| 51            | 1             | 0           | -2.507623               | 3.983461  | -0.436407 |
| 52            | 1             | 0           | -2.156787               | 5.372601  | 0.646222  |
| 53            | 6             | 0           | 6.130822                | -0.716855 | -1.570318 |
| 54            | 6             | 0           | 6.931070                | -1.751757 | -1.126684 |
| 55            | 6             | 0           | 6.633854                | -2.367690 | 0.094943  |

-----

1

|    |   |   |          |           |           |
|----|---|---|----------|-----------|-----------|
| 56 | 6 | 0 | 5.556517 | -1.953827 | 0.860001  |
| 57 | 1 | 0 | 6.316957 | -0.211062 | -2.508805 |
| 58 | 1 | 0 | 7.775490 | -2.084495 | -1.714756 |
| 59 | 1 | 0 | 7.252544 | -3.181003 | 0.452566  |
| 60 | 1 | 0 | 5.312586 | -2.421057 | 1.804155  |

**trans-exo-TS-I**

Standard orientation:

| Center Number | Atomic Number | Atomic Type | Coordinates (Angstroms) |           |           |
|---------------|---------------|-------------|-------------------------|-----------|-----------|
|               |               |             | X                       | Y         | Z         |
| 6             | 0             | 0.541594    | 0.368394                | 0.350589  |           |
| 2             | 7             | 0           | -1.477986               | -0.647998 | -0.405420 |
| 3             | 6             | 0           | -0.904029               | 0.224471  | 0.401313  |
| 4             | 6             | 0           | -1.633189               | 0.744381  | 1.601971  |
| 5             | 6             | 0           | 1.334321                | -0.186322 | -0.643240 |
| 6             | 6             | 0           | -0.619999               | -1.512788 | -1.239187 |
| 7             | 6             | 0           | 0.655935                | -0.866441 | -1.795150 |
| 8             | 1             | 0           | -1.381481               | 1.784259  | 1.811339  |
| 9             | 1             | 0           | -1.329768               | 0.112757  | 2.445111  |
| 10            | 1             | 0           | -2.708321               | 0.644705  | 1.488743  |
| 11            | 6             | 0           | 2.680986                | 0.270886  | -0.384343 |
| 12            | 6             | 0           | 2.612392                | 1.067942  | 0.784687  |
| 13            | 7             | 0           | 1.298815                | 1.139584  | 1.179979  |
| 14            | 1             | 0           | 0.998709                | 1.469257  | 2.082990  |
| 15            | 1             | 0           | -1.243795               | -1.920421 | -2.033424 |
| 16            | 1             | 0           | -0.328995               | -2.355038 | -0.602647 |
| 17            | 1             | 0           | 0.441966                | -0.135224 | -2.581004 |
| 18            | 1             | 0           | 1.277527                | -1.650278 | -2.229075 |
| 19            | 6             | 0           | 3.928170                | 0.005015  | -0.997490 |
| 20            | 6             | 0           | 5.057983                | 0.546916  | -0.412848 |
| 21            | 6             | 0           | 4.967923                | 1.349345  | 0.756172  |
| 22            | 6             | 0           | 3.765043                | 1.614388  | 1.364125  |
| 23            | 1             | 0           | 3.971462                | -0.621950 | -1.875292 |
| 24            | 1             | 0           | 3.714085                | 2.210595  | 2.265135  |
| 25            | 1             | 0           | 5.893669                | 1.732913  | 1.162634  |
| 26            | 8             | 0           | 6.316793                | 0.363786  | -0.871005 |
| 27            | 6             | 0           | 6.481803                | -0.519999 | -1.970098 |
| 28            | 1             | 0           | 6.086004                | -1.510375 | -1.731994 |
| 29            | 1             | 0           | 5.986543                | -0.128046 | -2.861707 |
| 30            | 1             | 0           | 7.551827                | -0.581445 | -2.144652 |
| 31            | 30            | 0           | 2.316226                | -1.768312 | 0.703289  |
| 32            | 17            | 0           | 2.823496                | -3.403078 | -0.642528 |
| 33            | 17            | 0           | 1.932417                | -1.586421 | 2.835921  |
| 34            | 6             | 0           | -4.681883               | 1.113995  | -0.160161 |
| 35            | 6             | 0           | -5.308147               | -0.223713 | -0.023479 |
| 36            | 6             | 0           | -3.404543               | 1.112525  | -0.856967 |
| 37            | 6             | 0           | -2.854308               | -0.121365 | -1.345734 |
| 38            | 6             | 0           | -4.756101               | -1.332738 | -0.661952 |
| 39            | 8             | 0           | -3.652066               | -1.224893 | -1.472721 |
| 40            | 8             | 0           | -5.191408               | 2.116945  | 0.326104  |
| 41            | 6             | 0           | -2.559997               | 2.222367  | -0.734739 |
| 42            | 6             | 0           | -1.236168               | 2.222183  | -1.111487 |
| 43            | 1             | 0           | -2.269645               | -0.027327 | -2.257112 |
| 44            | 1             | 0           | -2.953337               | 3.057191  | -0.164435 |
| 45            | 6             | 0           | -0.262454               | 3.238566  | -0.728486 |
| 46            | 8             | 0           | 0.871426                | 3.292252  | -1.160290 |
| 47            | 1             | 0           | -0.846871               | 1.528846  | -1.842558 |
| 48            | 8             | 0           | -0.714739               | 4.076362  | 0.234180  |
| 49            | 6             | 0           | 0.226253                | 5.077275  | 0.632279  |

Imaginary frequency: -351.8176 cm<sup>-1</sup>  
 Electronic energy  $E = -4189.669954$  a.u.  
 Enthalpy  $H = -4189.635464$  a.u.  
 Entropy  $S = 215.570$  cal/mol/K  
 Gibbs free energy  $G = -4189.737888$  a.u.  
 Total free energy in solution  $E_{sol} = -4190.85409$  a.u. 1

|    |   |   |           |           |           |
|----|---|---|-----------|-----------|-----------|
| 50 | 1 | 0 | 1.128158  | 4.611883  | 1.028762  |
| 51 | 1 | 0 | 0.499231  | 5.699995  | -0.217632 |
| 52 | 1 | 0 | -0.274941 | 5.665236  | 1.395331  |
| 53 | 6 | 0 | -6.461544 | -0.392954 | 0.746737  |
| 54 | 6 | 0 | -7.045352 | -1.642330 | 0.872053  |
| 55 | 6 | 0 | -6.477304 | -2.740289 | 0.218402  |
| 56 | 6 | 0 | -5.333422 | -2.593358 | -0.552651 |
| 57 | 1 | 0 | -6.871992 | 0.485155  | 1.227790  |
| 58 | 1 | 0 | -7.937987 | -1.770324 | 1.469768  |
| 59 | 1 | 0 | -6.930649 | -3.718744 | 0.312516  |
| 60 | 1 | 0 | -4.878357 | -3.427612 | -1.068886 |

**trans-exo-IM-I**

Standard orientation:

| Center Number | Atomic Number | Atomic Type | Coordinates (Angstroms) |           |           |
|---------------|---------------|-------------|-------------------------|-----------|-----------|
|               |               |             | X                       | Y         | Z         |
| 6             | 0             | 1.935846    | 0.541768                | 0.223937  |           |
| 2             | 7             | 0           | -0.342589               | -0.363536 | 0.164379  |
| 3             | 6             | 0           | 0.475494                | 0.902862  | 0.323351  |
| 4             | 6             | 0           | 0.130760                | 1.513435  | 1.688709  |
| 5             | 6             | 0           | 2.479554                | -0.714168 | 0.163790  |
| 6             | 6             | 0           | 0.295591                | -1.529169 | 0.864881  |
| 7             | 6             | 0           | 1.636524                | -1.940128 | 0.273305  |
| 8             | 1             | 0           | 0.843584                | 2.298496  | 1.939343  |
| 9             | 1             | 0           | 0.193576                | 0.756410  | 2.471460  |
| 10            | 1             | 0           | -0.874955               | 1.940661  | 1.680085  |
| 11            | 6             | 0           | 3.898185                | -0.547969 | 0.034619  |
| 12            | 6             | 0           | 4.140277                | 0.840285  | 0.022728  |
| 13            | 7             | 0           | 2.929298                | 1.487022  | 0.140907  |
| 14            | 1             | 0           | 2.765490                | 2.484546  | 0.107499  |
| 15            | 1             | 0           | -0.421932               | -2.343428 | 0.849688  |
| 16            | 1             | 0           | 0.418908                | -1.239096 | 1.906428  |
| 17            | 1             | 0           | 1.498818                | -2.441913 | -0.689593 |
| 18            | 1             | 0           | 2.090482                | -2.671900 | 0.946838  |
| 19            | 6             | 0           | 4.968787                | -1.455946 | -0.064092 |
| 20            | 6             | 0           | 6.248097                | -0.940456 | -0.175540 |
| 21            | 6             | 0           | 6.475747                | 0.455132  | -0.189865 |
| 22            | 6             | 0           | 5.436924                | 1.354684  | -0.090516 |
| 23            | 1             | 0           | 4.780181                | -2.520039 | -0.052676 |
| 24            | 1             | 0           | 5.623000                | 2.420944  | -0.098961 |
| 25            | 1             | 0           | 7.499641                | 0.791761  | -0.279835 |
| 26            | 8             | 0           | 7.378883                | -1.697402 | -0.280873 |
| 27            | 6             | 0           | 7.215959                | -3.100055 | -0.250559 |
| 28            | 1             | 0           | 6.758171                | -3.423079 | 0.688732  |
| 29            | 1             | 0           | 6.603489                | -3.444716 | -1.088643 |
| 30            | 1             | 0           | 8.213754                | -3.522803 | -0.332626 |
| 31            | 30            | 0           | -2.246099               | -0.192122 | 1.036770  |
| 32            | 17            | 0           | -2.488257               | -1.634038 | 2.674993  |
| 33            | 17            | 0           | -3.463545               | 1.630185  | 0.851431  |
| 34            | 6             | 0           | -2.875737               | 0.069832  | -2.143554 |
| 35            | 6             | 0           | -3.325698               | -1.158129 | -1.441441 |
| 36            | 6             | 0           | -1.466076               | 0.402717  | -1.815811 |
| 37            | 6             | 0           | -0.548149               | -0.664439 | -1.291008 |
| 38            | 6             | 0           | -2.379868               | -2.132016 | -1.100654 |
| 39            | 8             | 0           | -1.052717               | -1.968541 | -1.431898 |
| 40            | 8             | 0           | -3.608770               | 0.785549  | -2.788090 |
| 41            | 6             | 0           | -1.144098               | 1.667500  | -1.549582 |
| 42            | 6             | 0           | 0.156364                | 1.936764  | -0.859286 |

Imaginary frequency: none  
 Electronic energy  $E = -4189.735147$  a.u.  
 Enthalpy  $H = -4189.701689$  a.u.  
 Entropy  $S = 207.741$  cal/mol/K  
 Gibbs free energy  $G = -4189.800393$  a.u.  
 Total free energy in solution  $E_{\text{sol}} = -4190.91514$  a.u. 1

|    |   |   |           |           |           |
|----|---|---|-----------|-----------|-----------|
| 43 | 1 | 0 | 0.419282  | -0.668643 | -1.797626 |
| 44 | 1 | 0 | -1.841326 | 2.466531  | -1.759461 |
| 45 | 6 | 0 | 0.290491  | 3.360741  | -0.340622 |
| 46 | 8 | 0 | 1.355457  | 3.873556  | -0.061212 |
| 47 | 1 | 0 | 0.966313  | 1.817891  | -1.585143 |
| 48 | 8 | 0 | -0.872985 | 3.971131  | -0.197205 |
| 49 | 6 | 0 | -0.821487 | 5.293181  | 0.370077  |
| 50 | 1 | 0 | -0.355020 | 5.249739  | 1.351827  |
| 51 | 1 | 0 | -0.248779 | 5.950822  | -0.279836 |
| 52 | 1 | 0 | -1.855705 | 5.610017  | 0.442718  |
| 53 | 6 | 0 | -4.673879 | -1.367908 | -1.130432 |
| 54 | 6 | 0 | -5.061633 | -2.536771 | -0.497338 |
| 55 | 6 | 0 | -4.107408 | -3.511722 | -0.191113 |
| 56 | 6 | 0 | -2.766207 | -3.322023 | -0.494687 |
| 57 | 1 | 0 | -5.380035 | -0.589599 | -1.387803 |
| 58 | 1 | 0 | -6.098590 | -2.694383 | -0.234900 |
| 59 | 1 | 0 | -4.411086 | -4.422790 | 0.306969  |
| 60 | 1 | 0 | -2.015725 | -4.063025 | -0.255346 |

**trans-endo-TS-II**

Standard orientation:

Center Atomic Atomic Coordinates (Angstroms)  
Number Number Type X Y Z

|    |   |           |           |           |           |
|----|---|-----------|-----------|-----------|-----------|
| 6  | 0 | -1.521355 | -0.982350 | -0.465032 |           |
| 2  | 7 | 0         | 0.861723  | -0.670453 | -0.359488 |
| 3  | 6 | 0         | -0.213965 | -1.477834 | -0.110214 |
| 4  | 6 | 0         | 0.005538  | -2.963449 | -0.035577 |
| 5  | 6 | 0         | -1.821430 | 0.337492  | -0.715511 |
| 6  | 6 | 0         | 0.575342  | 0.632159  | -1.044477 |
| 7  | 6 | 0         | -0.728286 | 1.353528  | -0.690389 |
| 8  | 1 | 0         | -0.764997 | -3.447083 | 0.563765  |
| 9  | 1 | 0         | 0.983180  | -3.210913 | 0.372782  |
| 10 | 1 | 0         | -0.025821 | -3.363442 | -1.054863 |
| 11 | 6 | 0         | -3.228534 | 0.415327  | -0.907899 |
| 12 | 6 | 0         | -3.727404 | -0.901322 | -0.762213 |
| 13 | 7 | 0         | -2.671484 | -1.741942 | -0.505495 |
| 14 | 1 | 0         | -2.754767 | -2.678054 | -0.144508 |
| 15 | 1 | 0         | 0.547832  | 0.386420  | -2.107149 |
| 16 | 1 | 0         | 1.441402  | 1.274811  | -0.899854 |
| 17 | 1 | 0         | -0.883147 | 2.123316  | -1.450429 |
| 18 | 1 | 0         | -0.682008 | 1.864213  | 0.274412  |
| 19 | 6 | 0         | -4.109670 | 1.481284  | -1.187296 |
| 20 | 6 | 0         | -5.455545 | 1.195161  | -1.302566 |
| 21 | 6 | 0         | -5.939962 | -0.129895 | -1.153142 |
| 22 | 6 | 0         | -5.094862 | -1.183115 | -0.891190 |
| 23 | 8 | 0         | -6.423630 | 2.115573  | -1.562866 |
| 24 | 6 | 0         | -6.008553 | 3.458040  | -1.726284 |
| 25 | 1 | 0         | -3.725206 | 2.484731  | -1.299452 |
| 26 | 1 | 0         | -7.005387 | -0.282623 | -1.260593 |
| 27 | 1 | 0         | -5.476072 | -2.191165 | -0.789366 |
| 28 | 1 | 0         | -5.320893 | 3.555891  | -2.570607 |
| 29 | 1 | 0         | -6.910910 | 4.030311  | -1.923031 |
| 30 | 1 | 0         | -5.527062 | 3.833398  | -0.819198 |
| 31 | 6 | 0         | 1.511106  | 1.920899  | 1.977039  |
| 32 | 6 | 0         | 2.768284  | 2.285790  | 1.283229  |
| 33 | 6 | 0         | 1.172269  | 0.498849  | 1.935717  |
| 34 | 6 | 0         | 1.897942  | -0.392593 | 1.099370  |
| 35 | 6 | 0         | 3.493052  | 1.332836  | 0.573523  |
| 36 | 8 | 0         | 3.088090  | 0.003224  | 0.524041  |

Imaginary frequency: -471.1310 cm<sup>-1</sup>

Electronic energy  $E = -4189.686841$  a.u.

Enthalpy  $H = -4189.653495$  a.u.

Entropy  $S = 204.992$  cal/mol/K

Gibbs free energy  $G = -4189.750893$  a.u.

Total free energy in solution  $E_{sol} = -4190.86255$  a.u. 1

|    |    |   |           |           |           |
|----|----|---|-----------|-----------|-----------|
| 37 | 8  | 0 | 0.808588  | 2.754098  | 2.530570  |
| 38 | 6  | 0 | -0.060789 | 0.053604  | 2.406064  |
| 39 | 6  | 0 | -0.480152 | -1.255928 | 2.251322  |
| 40 | 1  | 0 | 1.994031  | -1.433840 | 1.383476  |
| 41 | 1  | 0 | -0.753112 | 0.808461  | 2.761270  |
| 42 | 6  | 0 | -1.876572 | -1.664112 | 2.449770  |
| 43 | 8  | 0 | -2.271848 | -2.809065 | 2.315959  |
| 44 | 1  | 0 | 0.219342  | -2.078489 | 2.241887  |
| 45 | 8  | 0 | -2.690938 | -0.635871 | 2.714268  |
| 46 | 6  | 0 | -4.076976 | -0.972322 | 2.858654  |
| 47 | 1  | 0 | -4.475374 | -1.319786 | 1.907132  |
| 48 | 1  | 0 | -4.197919 | -1.746798 | 3.613021  |
| 49 | 1  | 0 | -4.567654 | -0.052689 | 3.160523  |
| 50 | 6  | 0 | 3.238608  | 3.601582  | 1.302733  |
| 51 | 6  | 0 | 4.403211  | 3.938806  | 0.633178  |
| 52 | 6  | 0 | 5.105599  | 2.960215  | -0.075780 |
| 53 | 6  | 0 | 4.656157  | 1.647010  | -0.113288 |
| 54 | 1  | 0 | 2.660804  | 4.330695  | 1.855155  |
| 55 | 1  | 0 | 4.766572  | 4.957321  | 0.652948  |
| 56 | 1  | 0 | 6.010473  | 3.221770  | -0.607980 |
| 57 | 1  | 0 | 5.175430  | 0.877494  | -0.668309 |
| 58 | 30 | 0 | 2.709159  | -1.333171 | -1.233527 |
| 59 | 17 | 0 | 3.189156  | -0.209681 | -3.034183 |
| 60 | 17 | 0 | 3.498161  | -3.179949 | -0.368440 |

**trans-endo-IM-II**

Standard orientation:

| Center Number | Atomic Number | Atomic Type | Coordinates (Angstroms) |           |           |
|---------------|---------------|-------------|-------------------------|-----------|-----------|
|               |               |             | X                       | Y         | Z         |
| 6             | 0             | -1.611355   | -0.758376               | -0.269176 |           |
| 2             | 7             | 0           | 0.845021                | -0.570156 | -0.295878 |
| 3             | 6             | 0           | -0.330815               | -1.416277 | 0.153861  |
| 4             | 6             | 0           | -0.173373               | -2.812687 | -0.443493 |
| 5             | 6             | 0           | -1.833865               | 0.584934  | -0.363566 |
| 6             | 6             | 0           | 0.512387                | 0.768259  | -0.905084 |
| 7             | 6             | 0           | -0.680564               | 1.530918  | -0.327277 |
| 8             | 1             | 0           | -0.955385               | -3.481586 | -0.086604 |
| 9             | 1             | 0           | 0.787020                | -3.245429 | -0.164178 |
| 10            | 1             | 0           | -0.222107               | -2.750787 | -1.533337 |
| 11            | 6             | 0           | -3.233556               | 0.763141  | -0.616529 |
| 12            | 6             | 0           | -3.802319               | -0.526102 | -0.654174 |
| 13            | 7             | 0           | -2.794717               | -1.442210 | -0.430379 |
| 14            | 1             | 0           | -2.893810               | -2.440975 | -0.461094 |
| 15            | 1             | 0           | 0.298601                | 0.572177  | -1.954045 |
| 16            | 1             | 0           | 1.423957                | 1.361978  | -0.883007 |
| 17            | 1             | 0           | -0.860255               | 2.382996  | -0.988161 |
| 18            | 1             | 0           | -0.486206               | 1.932344  | 0.668401  |
| 19            | 6             | 0           | -4.040648               | 1.896578  | -0.822621 |
| 20            | 6             | 0           | -5.389816               | 1.700048  | -1.059425 |
| 21            | 6             | 0           | -5.944243               | 0.399733  | -1.098106 |
| 22            | 6             | 0           | -5.165669               | -0.719521 | -0.900476 |
| 23            | 8             | 0           | -6.289407               | 2.702280  | -1.271949 |
| 24            | 6             | 0           | -5.794086               | 4.025774  | -1.246196 |
| 25            | 1             | 0           | -3.604931               | 2.884665  | -0.787608 |
| 26            | 1             | 0           | -7.005209               | 0.315983  | -1.290163 |
| 27            | 1             | 0           | -5.600841               | -1.710471 | -0.937523 |
| 28            | 1             | 0           | -5.042040               | 4.179904  | -2.024886 |
| 29            | 1             | 0           | -6.648120               | 4.671454  | -1.432884 |
| 30            | 1             | 0           | -5.360706               | 4.264692  | -0.271036 |

Imaginary frequency: none  
 Electronic energy  $E = -4189.724164$  a.u.  
 Enthalpy  $H = -4189.690556$  a.u.  
 Entropy  $S = 208.612$  cal/mol/K  
 Gibbs free energy  $G = -4189.789674$  a.u.  
 Total free energy in solution  $E_{\text{sol}} = -4190.90151$  a.u. 1

|    |    |   |           |           |           |
|----|----|---|-----------|-----------|-----------|
| 31 | 6  | 0 | 1.836986  | 1.556378  | 2.437599  |
| 32 | 6  | 0 | 2.961944  | 2.058162  | 1.617726  |
| 33 | 6  | 0 | 1.261821  | 0.275955  | 1.968462  |
| 34 | 6  | 0 | 1.834300  | -0.463875 | 0.812217  |
| 35 | 6  | 0 | 3.470588  | 1.320794  | 0.545048  |
| 36 | 8  | 0 | 3.016485  | 0.056382  | 0.228662  |
| 37 | 8  | 0 | 1.382405  | 2.162154  | 3.388511  |
| 38 | 6  | 0 | 0.120708  | -0.251792 | 2.416342  |
| 39 | 6  | 0 | -0.364235 | -1.510003 | 1.755886  |
| 40 | 1  | 0 | 2.089617  | -1.488923 | 1.090692  |
| 41 | 1  | 0 | -0.462554 | 0.212971  | 3.200565  |
| 42 | 6  | 0 | -1.758729 | -1.845196 | 2.263972  |
| 43 | 8  | 0 | -2.458896 | -1.087073 | 2.881980  |
| 44 | 1  | 0 | 0.291201  | -2.346473 | 2.030274  |
| 45 | 8  | 0 | -2.114851 | -3.104397 | 1.963606  |
| 46 | 6  | 0 | -3.445649 | -3.453807 | 2.385299  |
| 47 | 1  | 0 | -3.528542 | -3.362260 | 3.465740  |
| 48 | 1  | 0 | -4.167152 | -2.788006 | 1.912934  |
| 49 | 1  | 0 | -3.589852 | -4.482538 | 2.070678  |
| 50 | 6  | 0 | 3.512010  | 3.316095  | 1.888569  |
| 51 | 6  | 0 | 4.536306  | 3.821193  | 1.107294  |
| 52 | 6  | 0 | 5.018430  | 3.068077  | 0.032896  |
| 53 | 6  | 0 | 4.491804  | 1.817054  | -0.256056 |
| 54 | 1  | 0 | 3.102246  | 3.869400  | 2.723444  |
| 55 | 1  | 0 | 4.957329  | 4.794080  | 1.321220  |
| 56 | 1  | 0 | 5.812343  | 3.460063  | -0.589266 |
| 57 | 1  | 0 | 4.845111  | 1.223928  | -1.089258 |
| 58 | 30 | 0 | 2.447274  | -1.235264 | -1.568296 |
| 59 | 17 | 0 | 2.699900  | -0.052059 | -3.375164 |
| 60 | 17 | 0 | 3.349151  | -3.100426 | -0.855580 |

### trans-exo-TS-II

Standard orientation:

| Center Number | Atomic Number | Atomic Type | Coordinates (Angstroms) |           |           |
|---------------|---------------|-------------|-------------------------|-----------|-----------|
|               |               |             | X                       | Y         | Z         |
| 6             | 0             | 1.659493    | 0.054303                | 0.490312  |           |
| 2             | 7             | 0           | -0.560183               | -0.446443 | -0.340250 |
| 3             | 6             | 0           | 0.254842                | 0.409415  | 0.379537  |
| 4             | 6             | 0           | -0.359292               | 1.171025  | 1.518881  |
| 5             | 6             | 0           | 2.336715                | -0.708348 | -0.427143 |
| 6             | 6             | 0           | 0.147270                | -1.578409 | -1.025835 |
| 7             | 6             | 0           | 1.555968                | -1.295292 | -1.556949 |
| 8             | 1             | 0           | 0.238136                | 2.050740  | 1.756899  |
| 9             | 1             | 0           | -0.423750               | 0.514122  | 2.390995  |
| 10            | 1             | 0           | -1.376796               | 1.482446  | 1.294190  |
| 11            | 6             | 0           | 3.708257                | -0.714223 | -0.037976 |
| 12            | 6             | 0           | 3.792623                | 0.071134  | 1.134851  |
| 13            | 7             | 0           | 2.536531                | 0.556057  | 1.425181  |
| 14            | 1             | 0           | 2.277871                | 1.026986  | 2.274157  |
| 15            | 1             | 0           | -0.521515               | -1.943510 | -1.804650 |
| 16            | 1             | 0           | 0.227923                | -2.378037 | -0.289936 |
| 17            | 1             | 0           | 1.556634                | -0.636807 | -2.432787 |
| 18            | 1             | 0           | 1.975540                | -2.248008 | -1.886992 |
| 19            | 6             | 0           | 4.863513                | -1.323088 | -0.567145 |
| 20            | 6             | 0           | 6.058234                | -1.135966 | 0.100968  |
| 21            | 6             | 0           | 6.123106                | -0.357277 | 1.282849  |
| 22            | 6             | 0           | 5.005488                | 0.247749  | 1.810508  |
| 23            | 1             | 0           | 4.798469                | -1.915356 | -1.468408 |
| 24            | 1             | 0           | 5.069936                | 0.840405  | 2.714174  |

Imaginary frequency: -470.2858 cm<sup>-1</sup>  
 Electronic energy  $E = -4189.672189$  a.u.  
 Enthalpy  $H = -4189.638153$  a.u.  
 Entropy  $S = 208.601$  cal/mol/K  
 Gibbs free energy  $G = -4189.737266$  a.u.  
 Total free energy in solution  $E_{\text{sol}} = -4190.85265$  a.u. 1

|    |    |   |           |           |           |
|----|----|---|-----------|-----------|-----------|
| 25 | 1  | 0 | 7.089995  | -0.254451 | 1.756377  |
| 26 | 8  | 0 | 7.252968  | -1.661130 | -0.288201 |
| 27 | 6  | 0 | 7.256930  | -2.450924 | -1.461057 |
| 28 | 1  | 0 | 6.614026  | -3.328065 | -1.346031 |
| 29 | 1  | 0 | 6.927834  | -1.869919 | -2.326826 |
| 30 | 1  | 0 | 8.285346  | -2.770208 | -1.606413 |
| 31 | 30 | 0 | -2.201822 | -1.381518 | 0.636340  |
| 32 | 17 | 0 | -2.133830 | -3.554526 | 0.233568  |
| 33 | 17 | 0 | -3.043927 | -0.550075 | 2.483986  |
| 34 | 6  | 0 | -3.127948 | 2.126458  | -0.873556 |
| 35 | 6  | 0 | -4.036067 | 0.969960  | -0.696599 |
| 36 | 6  | 0 | -1.788257 | 1.751113  | -1.338646 |
| 37 | 6  | 0 | -1.521526 | 0.411309  | -1.740805 |
| 38 | 6  | 0 | -3.671710 | -0.289200 | -1.183214 |
| 39 | 8  | 0 | -2.541978 | -0.455314 | -1.964606 |
| 40 | 8  | 0 | -3.440677 | 3.265149  | -0.570798 |
| 41 | 6  | 0 | -0.704654 | 2.551650  | -1.008520 |
| 42 | 6  | 0 | 0.589825  | 2.049033  | -1.066720 |
| 43 | 1  | 0 | -0.742916 | 0.235619  | -2.470350 |
| 44 | 1  | 0 | -0.908994 | 3.493258  | -0.511655 |
| 45 | 6  | 0 | 1.772113  | 2.806700  | -0.614046 |
| 46 | 8  | 0 | 2.889652  | 2.614941  | -1.030906 |
| 47 | 1  | 0 | 0.860759  | 1.314486  | -1.810619 |
| 48 | 8  | 0 | 1.482232  | 3.704818  | 0.349033  |
| 49 | 6  | 0 | 2.617780  | 4.445231  | 0.818166  |
| 50 | 1  | 0 | 3.362841  | 3.763132  | 1.225196  |
| 51 | 1  | 0 | 3.062358  | 5.006935  | -0.000858 |
| 52 | 1  | 0 | 2.235980  | 5.112998  | 1.583943  |
| 53 | 6  | 0 | -5.212432 | 1.089414  | 0.039771  |
| 54 | 6  | 0 | -6.006814 | -0.024230 | 0.274431  |
| 55 | 6  | 0 | -5.633185 | -1.268469 | -0.230882 |
| 56 | 6  | 0 | -4.467571 | -1.412325 | -0.978338 |
| 57 | 1  | 0 | -5.463881 | 2.066370  | 0.430415  |
| 58 | 1  | 0 | -6.908558 | 0.068994  | 0.864008  |
| 59 | 1  | 0 | -6.244842 | -2.139804 | -0.039842 |
| 60 | 1  | 0 | -4.164094 | -2.364058 | -1.391344 |

**trans-exo-IM-II**

Standard orientation:

| Center Number | Atomic Number | Atomic Type | Coordinates (Angstroms) |           |           |
|---------------|---------------|-------------|-------------------------|-----------|-----------|
|               |               |             | X                       | Y         | Z         |
| 1             | 6             | 0           | 1.935846                | 0.541768  | 0.223937  |
| 2             | 7             | 0           | -0.342589               | -0.363536 | 0.164379  |
| 3             | 6             | 0           | 0.475494                | 0.902862  | 0.323351  |
| 4             | 6             | 0           | 0.130760                | 1.513435  | 1.688709  |
| 5             | 6             | 0           | 2.479554                | -0.714168 | 0.163790  |
| 6             | 6             | 0           | 0.295591                | -1.529169 | 0.864881  |
| 7             | 6             | 0           | 1.636524                | -1.940128 | 0.273305  |
| 8             | 1             | 0           | 0.843584                | 2.298496  | 1.939343  |
| 9             | 1             | 0           | 0.193576                | 0.756410  | 2.471460  |
| 10            | 1             | 0           | -0.874955               | 1.940661  | 1.680085  |
| 11            | 6             | 0           | 3.898185                | -0.547969 | 0.034619  |
| 12            | 6             | 0           | 4.140277                | 0.840285  | 0.022728  |
| 13            | 7             | 0           | 2.929298                | 1.487022  | 0.140907  |
| 14            | 1             | 0           | 2.765490                | 2.484546  | 0.107499  |
| 15            | 1             | 0           | -0.421932               | -2.343428 | 0.849688  |
| 16            | 1             | 0           | 0.418908                | -1.239096 | 1.906428  |
| 17            | 1             | 0           | 1.498818                | -2.441913 | -0.689593 |

Imaginary frequency: none

Electronic energy  $E = -4189.729775$  a.u.

Enthalpy  $H = -4189.696505$  a.u.

Entropy  $S = 204.768$  cal/mol/K

Gibbs free energy  $G = -4189.793796$  a.u.

Total free energy in solution  $E_{\text{sol}} = -4190.90962$  a.u.

|    |    |   |           |           |           |
|----|----|---|-----------|-----------|-----------|
| 18 | 1  | 0 | 2.090482  | -2.671900 | 0.946838  |
| 19 | 6  | 0 | 4.968787  | -1.455946 | -0.064092 |
| 20 | 6  | 0 | 6.248097  | -0.940456 | -0.175540 |
| 21 | 6  | 0 | 6.475747  | 0.455132  | -0.189865 |
| 22 | 6  | 0 | 5.436924  | 1.354684  | -0.090516 |
| 23 | 1  | 0 | 4.780181  | -2.520039 | -0.052676 |
| 24 | 1  | 0 | 5.623000  | 2.420944  | -0.098961 |
| 25 | 1  | 0 | 7.499641  | 0.791761  | -0.279835 |
| 26 | 8  | 0 | 7.378883  | -1.697402 | -0.280873 |
| 27 | 6  | 0 | 7.215959  | -3.100055 | -0.250559 |
| 28 | 1  | 0 | 6.758171  | -3.423079 | 0.688732  |
| 29 | 1  | 0 | 6.603489  | -3.444716 | -1.088643 |
| 30 | 1  | 0 | 8.213754  | -3.522803 | -0.332626 |
| 31 | 30 | 0 | -2.246099 | -0.192122 | 1.036770  |
| 32 | 17 | 0 | -2.488257 | -1.634038 | 2.674993  |
| 33 | 17 | 0 | -3.463545 | 1.630185  | 0.851431  |
| 34 | 6  | 0 | -2.875737 | 0.069832  | -2.143554 |
| 35 | 6  | 0 | -3.325698 | -1.158129 | -1.441441 |
| 36 | 6  | 0 | -1.466076 | 0.402717  | -1.815811 |
| 37 | 6  | 0 | -0.548149 | -0.664439 | -1.291008 |
| 38 | 6  | 0 | -2.379868 | -2.132016 | -1.100654 |
| 39 | 8  | 0 | -1.052717 | -1.968541 | -1.431898 |
| 40 | 8  | 0 | -3.608770 | 0.785549  | -2.788090 |
| 41 | 6  | 0 | -1.144098 | 1.667500  | -1.549582 |
| 42 | 6  | 0 | 0.156364  | 1.936764  | -0.859286 |
| 43 | 1  | 0 | 0.419282  | -0.668643 | -1.797626 |
| 44 | 1  | 0 | -1.841326 | 2.466531  | -1.759461 |
| 45 | 6  | 0 | 0.290491  | 3.360741  | -0.340622 |
| 46 | 8  | 0 | 1.355457  | 3.873556  | -0.061212 |
| 47 | 1  | 0 | 0.966313  | 1.817891  | -1.585143 |
| 48 | 8  | 0 | -0.872985 | 3.971131  | -0.197205 |
| 49 | 6  | 0 | -0.821487 | 5.293181  | 0.370077  |
| 50 | 1  | 0 | -0.355020 | 5.249739  | 1.351827  |
| 51 | 1  | 0 | -0.248779 | 5.950822  | -0.279836 |
| 52 | 1  | 0 | -1.855705 | 5.610017  | 0.442718  |
| 53 | 6  | 0 | -4.673879 | -1.367908 | -1.130432 |
| 54 | 6  | 0 | -5.061633 | -2.536771 | -0.497338 |
| 55 | 6  | 0 | -4.107408 | -3.511722 | -0.191113 |
| 56 | 6  | 0 | -2.766207 | -3.322023 | -0.494687 |
| 57 | 1  | 0 | -5.380035 | -0.589599 | -1.387803 |
| 58 | 1  | 0 | -6.098590 | -2.694383 | -0.234900 |
| 59 | 1  | 0 | -4.411086 | -4.422790 | 0.306969  |
| 60 | 1  | 0 | -2.015725 | -4.063025 | -0.255346 |

**trans-COM-III**

Standard orientation:

Imaginary frequency: none

Electronic energy  $E = -3501.457489$  a.u.

Enthalpy  $H = -3501.436232$  a.u.

Entropy  $S = 208.601$  cal/mol/K

Gibbs free energy  $G = -3501.511236$  a.u.

Total free energy in solution  $E_{\text{sol}} = -3502.20223$  a.u.

| Center Number | Atomic Number | Atomic Type | Coordinates (Angstroms) |           |           |
|---------------|---------------|-------------|-------------------------|-----------|-----------|
|               |               |             | X                       | Y         | Z         |
| 1             | 6             | 0           | -0.771307               | 2.219618  | -0.003796 |
| 2             | 6             | 0           | 0.689418                | 2.413261  | -0.096013 |
| 3             | 6             | 0           | -1.216338               | 0.813056  | -0.091304 |
| 4             | 6             | 0           | -0.314987               | -0.166534 | -0.254043 |
| 5             | 6             | 0           | 1.549491                | 1.330026  | -0.235483 |
| 6             | 8             | 0           | 1.044846                | 0.031872  | -0.286128 |
| 7             | 8             | 0           | -1.552339               | 3.144848  | 0.113451  |
| 8             | 6             | 0           | -2.658106               | 0.549368  | -0.044638 |
| 9             | 6             | 0           | -3.210386               | -0.591850 | 0.375966  |
| 10            | 1             | 0           | -0.556840               | -1.208028 | -0.412297 |
| 11            | 1             | 0           | -3.288496               | 1.373399  | -0.353968 |



|    |    |   |           |           |           |
|----|----|---|-----------|-----------|-----------|
| 12 | 6  | 0 | -4.673005 | -0.828106 | 0.384936  |
| 13 | 8  | 0 | -5.175758 | -1.850378 | 0.788039  |
| 14 | 1  | 0 | -2.632585 | -1.422101 | 0.763038  |
| 15 | 8  | 0 | -5.378127 | 0.207076  | -0.096793 |
| 16 | 6  | 0 | -6.798290 | 0.012903  | -0.085270 |
| 17 | 1  | 0 | -7.062558 | -0.849688 | -0.693762 |
| 18 | 1  | 0 | -7.145250 | -0.148599 | 0.933554  |
| 19 | 1  | 0 | -7.220097 | 0.923465  | -0.498543 |
| 20 | 6  | 0 | 1.236803  | 3.700089  | -0.063388 |
| 21 | 6  | 0 | 2.603427  | 3.881026  | -0.172176 |
| 22 | 6  | 0 | 3.442525  | 2.771854  | -0.320562 |
| 23 | 6  | 0 | 2.923474  | 1.486821  | -0.356328 |
| 24 | 1  | 0 | 0.552367  | 4.530687  | 0.046121  |
| 25 | 1  | 0 | 3.024577  | 4.876692  | -0.145211 |
| 26 | 1  | 0 | 4.512130  | 2.908242  | -0.407909 |
| 27 | 1  | 0 | 3.571702  | 0.627198  | -0.452674 |
| 28 | 30 | 0 | 2.183748  | -1.742130 | -0.007689 |
| 29 | 17 | 0 | 1.161356  | -3.111194 | -1.290401 |
| 30 | 17 | 0 | 3.686133  | -1.427859 | 1.471363  |

-----

**trans-endo-TS-III**

Standard orientation:

| Center Number | Atomic Number | Atomic Type | Coordinates (Angstroms) |           |           |
|---------------|---------------|-------------|-------------------------|-----------|-----------|
|               |               |             | X                       | Y         | Z         |
| 1             | 6             | 0           | -1.919194               | -0.717674 | -1.380907 |
| 2             | 7             | 0           | 0.307477                | 0.037212  | -1.039194 |
| 3             | 6             | 0           | -0.504871               | -0.958904 | -1.236776 |
| 4             | 6             | 0           | -0.006757               | -2.372850 | -1.303781 |
| 5             | 6             | 0           | -2.509473               | 0.474397  | -1.021097 |
| 6             | 6             | 0           | -0.240097               | 1.398776  | -1.181564 |
| 7             | 6             | 0           | -1.649158               | 1.623159  | -0.612515 |
| 8             | 1             | 0           | -0.378603               | -2.965353 | -0.463969 |
| 9             | 1             | 0           | 1.077814                | -2.427326 | -1.325431 |
| 10            | 1             | 0           | -0.381223               | -2.827918 | -2.224860 |
| 11            | 6             | 0           | -3.913124               | 0.249066  | -0.993047 |
| 12            | 6             | 0           | -4.114306               | -1.099247 | -1.373114 |
| 13            | 7             | 0           | -2.890119               | -1.670111 | -1.608840 |
| 14            | 1             | 0           | -2.733022               | -2.637563 | -1.826874 |
| 15            | 1             | 0           | -0.264032               | 1.586668  | -2.258592 |
| 16            | 1             | 0           | 0.467996                | 2.091194  | -0.734428 |
| 17            | 1             | 0           | -2.021433               | 2.567817  | -1.015055 |
| 18            | 1             | 0           | -1.645819               | 1.711924  | 0.477089  |
| 19            | 6             | 0           | -5.013696               | 1.067732  | -0.659711 |
| 20            | 6             | 0           | -6.275366               | 0.511705  | -0.723698 |
| 21            | 6             | 0           | -6.461048               | -0.839160 | -1.120057 |
| 22            | 6             | 0           | -5.401811               | -1.651109 | -1.448966 |
| 23            | 8             | 0           | -7.428598               | 1.169306  | -0.429296 |
| 24            | 6             | 0           | -7.308657               | 2.514071  | -0.003136 |
| 25            | 1             | 0           | -4.850642               | 2.091284  | -0.355599 |
| 26            | 1             | 0           | -7.477073               | -1.208979 | -1.151434 |
| 27            | 1             | 0           | -5.561535               | -2.679939 | -1.744907 |
| 28            | 1             | 0           | -6.856116               | 3.132623  | -0.782847 |
| 29            | 1             | 0           | -8.319946               | 2.858582  | 0.194004  |
| 30            | 1             | 0           | -6.711737               | 2.583184  | 0.909891  |
| 31            | 6             | 0           | 1.763987                | 1.973653  | 1.506016  |
| 32            | 6             | 0           | 2.801679                | 2.306443  | 0.485231  |
| 33            | 6             | 0           | 1.171939                | 0.662518  | 1.362062  |
| 34            | 6             | 0           | 1.568765                | -0.186576 | 0.312218  |
| 35            | 6             | 0           | 3.245861                | 1.357212  | -0.425712 |

Imaginary frequency: -289.4825 cm<sup>-1</sup>

Electronic energy  $E = -4189.661738$  a.u.

Enthalpy  $H = -4189.627028$  a.u.

Entropy  $S = 216.281$  cal/mol/K

Gibbs free energy  $G = -4189.729790$  a.u.

Total free energy in solution  $E_{\text{sol}} = -4190.84757$  a.u.

|    |    |   |           |           |           |
|----|----|---|-----------|-----------|-----------|
| 36 | 8  | 0 | 2.804648  | 0.025298  | -0.311928 |
| 37 | 8  | 0 | 1.428357  | 2.799542  | 2.347258  |
| 38 | 6  | 0 | -0.064483 | 0.381587  | 2.036421  |
| 39 | 6  | 0 | -0.832015 | -0.719343 | 1.883113  |
| 40 | 1  | 0 | 1.424598  | -1.251229 | 0.415556  |
| 41 | 1  | 0 | -0.462253 | 1.198050  | 2.632043  |
| 42 | 6  | 0 | -2.231210 | -0.691459 | 2.319420  |
| 43 | 8  | 0 | -2.787508 | 0.223927  | 2.888090  |
| 44 | 1  | 0 | -0.507572 | -1.609449 | 1.362682  |
| 45 | 8  | 0 | -2.881163 | -1.812265 | 1.929971  |
| 46 | 6  | 0 | -4.284934 | -1.804291 | 2.209094  |
| 47 | 1  | 0 | -4.456907 | -1.708248 | 3.279743  |
| 48 | 1  | 0 | -4.766609 | -0.975278 | 1.691692  |
| 49 | 1  | 0 | -4.663331 | -2.753846 | 1.841296  |
| 50 | 6  | 0 | 3.296045  | 3.606363  | 0.373113  |
| 51 | 6  | 0 | 4.204354  | 3.927850  | -0.625078 |
| 52 | 6  | 0 | 4.620909  | 2.951942  | -1.531590 |
| 53 | 6  | 0 | 4.139706  | 1.650963  | -1.441319 |
| 54 | 1  | 0 | 2.940943  | 4.335819  | 1.089050  |
| 55 | 1  | 0 | 4.588908  | 4.935906  | -0.704253 |
| 56 | 1  | 0 | 5.326386  | 3.200263  | -2.313215 |
| 57 | 1  | 0 | 4.461953  | 0.880279  | -2.127570 |
| 58 | 30 | 0 | 4.236224  | -1.445676 | -0.027480 |
| 59 | 17 | 0 | 3.124701  | -3.256096 | 0.342822  |
| 60 | 17 | 0 | 6.238644  | -0.760099 | -0.303048 |

**trans-endo-IM-III**

Standard orientation:

| Center Number | Atomic Number | Atomic Type | Coordinates (Angstroms) |           |           |
|---------------|---------------|-------------|-------------------------|-----------|-----------|
|               |               |             | X                       | Y         | Z         |
| 1             | 6             | 0           | -1.538706               | -0.915546 | -0.285332 |
| 2             | 7             | 0           | 0.914317                | -0.651426 | -0.272266 |
| 3             | 6             | 0           | -0.246554               | -1.500688 | 0.209173  |
| 4             | 6             | 0           | -0.034688               | -2.934383 | -0.269300 |
| 5             | 6             | 0           | -1.791825               | 0.405119  | -0.527128 |
| 6             | 6             | 0           | 0.555867                | 0.576051  | -1.066704 |
| 7             | 6             | 0           | -0.663102               | 1.377163  | -0.610593 |
| 8             | 1             | 0           | -0.797116               | -3.598346 | 0.136474  |
| 9             | 1             | 0           | 0.936751                | -3.304015 | 0.059264  |
| 10            | 1             | 0           | -0.071812               | -2.963404 | -1.360951 |
| 11            | 6             | 0           | -3.198020               | 0.524330  | -0.778489 |
| 12            | 6             | 0           | -3.737084               | -0.774118 | -0.666699 |
| 13            | 7             | 0           | -2.704227               | -1.640936 | -0.375984 |
| 14            | 1             | 0           | -2.803647               | -2.617500 | -0.157432 |
| 15            | 1             | 0           | 0.362497                | 0.226769  | -2.079674 |
| 16            | 1             | 0           | 1.451921                | 1.190766  | -1.120914 |
| 17            | 1             | 0           | -0.854654               | 2.128676  | -1.381122 |
| 18            | 1             | 0           | -0.489473               | 1.913728  | 0.323994  |
| 19            | 6             | 0           | -4.036624               | 1.610811  | -1.090087 |
| 20            | 6             | 0           | -5.386467               | 1.361101  | -1.266629 |
| 21            | 6             | 0           | -5.911676               | 0.053168  | -1.146711 |
| 22            | 6             | 0           | -5.101735               | -1.021922 | -0.853502 |
| 23            | 8             | 0           | -6.315729               | 2.313762  | -1.563017 |
| 24            | 6             | 0           | -5.854083               | 3.641912  | -1.707296 |
| 25            | 1             | 0           | -3.623711               | 2.605598  | -1.177373 |
| 26            | 1             | 0           | -6.974786               | -0.072801 | -1.300458 |
| 27            | 1             | 0           | -5.511796               | -2.021174 | -0.775955 |
| 28            | 1             | 0           | -5.127159               | 3.719898  | -2.520454 |
| 29            | 1             | 0           | -6.729144               | 4.241482  | -1.943306 |

Imaginary frequency: none  
 Electronic energy  $E = -4189.724159$  a.u.  
 Enthalpy  $H = -4189.690553$  a.u.  
 Entropy  $S = 208.589$  cal/mol/K  
 Gibbs free energy  $G = -4189.789660$  a.u.  
 Total free energy in solution  $E_{\text{sol}} = -4190.90152$  a.u.

|    |    |   |           |           |           |
|----|----|---|-----------|-----------|-----------|
| 30 | 1  | 0 | -5.401633 | 4.004946  | -0.780211 |
| 31 | 6  | 0 | 1.589594  | 1.814554  | 2.266288  |
| 32 | 6  | 0 | 2.718235  | 2.313766  | 1.451239  |
| 33 | 6  | 0 | 1.137233  | 0.450669  | 1.911368  |
| 34 | 6  | 0 | 1.825412  | -0.354952 | 0.868390  |
| 35 | 6  | 0 | 3.342774  | 1.508176  | 0.494483  |
| 36 | 8  | 0 | 3.001906  | 0.186296  | 0.296687  |
| 37 | 8  | 0 | 1.037707  | 2.478504  | 3.122715  |
| 38 | 6  | 0 | 0.021664  | -0.122411 | 2.369228  |
| 39 | 6  | 0 | -0.324006 | -1.474788 | 1.812865  |
| 40 | 1  | 0 | 2.133158  | -1.323948 | 1.267566  |
| 41 | 1  | 0 | -0.616543 | 0.375849  | 3.085506  |
| 42 | 6  | 0 | -1.686219 | -1.992398 | 2.244745  |
| 43 | 8  | 0 | -2.021726 | -3.150957 | 2.143948  |
| 44 | 1  | 0 | 0.399117  | -2.218407 | 2.168772  |
| 45 | 8  | 0 | -2.477071 | -1.030987 | 2.712047  |
| 46 | 6  | 0 | -3.811491 | -1.445588 | 3.051865  |
| 47 | 1  | 0 | -4.321253 | -1.795537 | 2.156543  |
| 48 | 1  | 0 | -3.776505 | -2.240120 | 3.793738  |
| 49 | 1  | 0 | -4.296176 | -0.558920 | 3.445545  |
| 50 | 6  | 0 | 3.157934  | 3.633231  | 1.608442  |
| 51 | 6  | 0 | 4.187747  | 4.131295  | 0.830335  |
| 52 | 6  | 0 | 4.787969  | 3.307784  | -0.126871 |
| 53 | 6  | 0 | 4.372268  | 1.995413  | -0.301940 |
| 54 | 1  | 0 | 2.660068  | 4.238457  | 2.354641  |
| 55 | 1  | 0 | 4.523115  | 5.151566  | 0.956544  |
| 56 | 1  | 0 | 5.587766  | 3.692395  | -0.746105 |
| 57 | 1  | 0 | 4.817685  | 1.345561  | -1.043718 |
| 58 | 30 | 0 | 2.617542  | -1.367310 | -1.367980 |
| 59 | 17 | 0 | 3.566913  | -3.070633 | -0.373826 |
| 60 | 17 | 0 | 2.931867  | -0.366727 | -3.273799 |

### trans-exo-TS1-III

Standard orientation:

| Center Number | Atomic Number | Atomic Type | Coordinates (Angstroms) |           |           |
|---------------|---------------|-------------|-------------------------|-----------|-----------|
|               |               |             | X                       | Y         | Z         |
| 1             | 6             | 0           | 1.909432                | -0.672498 | -1.200314 |
| 2             | 7             | 0           | -0.393361               | -0.154223 | -0.966068 |
| 3             | 6             | 0           | 0.530865                | -1.074995 | -1.075677 |
| 4             | 6             | 0           | 0.177358                | -2.524840 | -1.203478 |
| 5             | 6             | 0           | 2.349311                | 0.601820  | -0.909229 |
| 6             | 6             | 0           | 0.012380                | 1.243165  | -1.202632 |
| 7             | 6             | 0           | 1.346221                | 1.659464  | -0.575110 |
| 8             | 1             | 0           | 0.776361                | -3.143596 | -0.533241 |
| 9             | 1             | 0           | 0.387518                | -2.814253 | -2.239302 |
| 10            | 1             | 0           | -0.878622               | -2.697520 | -1.024192 |
| 11            | 6             | 0           | 3.770082                | 0.558399  | -0.902224 |
| 12            | 6             | 0           | 4.134679                | -0.771905 | -1.221109 |
| 13            | 7             | 0           | 2.988563                | -1.505505 | -1.398125 |
| 14            | 1             | 0           | 2.946657                | -2.498467 | -1.547498 |
| 15            | 1             | 0           | -0.793382               | 1.886943  | -0.855210 |
| 16            | 1             | 0           | 0.085634                | 1.351656  | -2.288108 |
| 17            | 1             | 0           | 1.259809                | 1.788714  | 0.509462  |
| 18            | 1             | 0           | 1.626168                | 2.632636  | -0.983709 |

Imaginary frequency: -217.3364 cm<sup>-1</sup>  
 Electronic energy  $E = -4189.659210$  a.u.  
 Enthalpy  $H = -4189.624524$  a.u.  
 Entropy  $S = 220.769$  cal/mol/K  
 Gibbs free energy  $G = -4189.729418$  a.u.  
 Total free energy in solution  $E_{\text{sol}} = -4190.84841$  a.u.

|    |    |   |           |           |           |
|----|----|---|-----------|-----------|-----------|
| 19 | 6  | 0 | 4.764815  | 1.525379  | -0.642701 |
| 20 | 6  | 0 | 6.085112  | 1.130307  | -0.715149 |
| 21 | 6  | 0 | 6.434123  | -0.204499 | -1.050007 |
| 22 | 6  | 0 | 5.479768  | -1.159409 | -1.308843 |
| 23 | 1  | 0 | 4.480930  | 2.537155  | -0.391861 |
| 24 | 1  | 0 | 5.761941  | -2.173621 | -1.560897 |
| 25 | 1  | 0 | 7.488353  | -0.442580 | -1.095152 |
| 26 | 8  | 0 | 7.151873  | 1.942906  | -0.485373 |
| 27 | 6  | 0 | 6.873999  | 3.282488  | -0.124041 |
| 28 | 1  | 0 | 6.332327  | 3.799337  | -0.920635 |
| 29 | 1  | 0 | 6.291395  | 3.326020  | 0.799962  |
| 30 | 1  | 0 | 7.837906  | 3.759441  | 0.029461  |
| 31 | 6  | 0 | -2.668979 | -2.398482 | 0.779627  |
| 32 | 6  | 0 | -3.632275 | -1.901043 | -0.245446 |
| 33 | 6  | 0 | -1.596855 | -1.479181 | 1.090266  |
| 34 | 6  | 0 | -1.544887 | -0.218724 | 0.459873  |
| 35 | 6  | 0 | -3.601000 | -0.585661 | -0.690383 |
| 36 | 8  | 0 | -2.719254 | 0.323456  | -0.078108 |
| 37 | 8  | 0 | -2.765260 | -3.533359 | 1.231474  |
| 38 | 6  | 0 | -0.391187 | -1.987835 | 1.660818  |
| 39 | 6  | 0 | 0.774893  | -1.304979 | 1.771948  |
| 40 | 1  | 0 | -1.012259 | 0.578046  | 0.963098  |
| 41 | 1  | 0 | -0.387327 | -3.051978 | 1.876387  |
| 42 | 6  | 0 | 2.035742  | -2.021395 | 1.960716  |
| 43 | 8  | 0 | 2.185329  | -3.227653 | 1.923284  |
| 44 | 1  | 0 | 0.851782  | -0.232627 | 1.655836  |
| 45 | 8  | 0 | 3.066708  | -1.160736 | 2.090486  |
| 46 | 6  | 0 | 4.356817  | -1.770764 | 2.159949  |
| 47 | 1  | 0 | 4.455385  | -2.342045 | 3.082032  |
| 48 | 1  | 0 | 4.505747  | -2.436239 | 1.311238  |
| 49 | 1  | 0 | 5.070653  | -0.952495 | 2.129431  |
| 50 | 6  | 0 | -4.550972 | -2.771968 | -0.832416 |
| 51 | 6  | 0 | -5.400469 | -2.325532 | -1.833861 |
| 52 | 6  | 0 | -5.332518 | -1.000587 | -2.267080 |
| 53 | 6  | 0 | -4.425149 | -0.114303 | -1.698231 |
| 54 | 1  | 0 | -4.566358 | -3.792682 | -0.473736 |
| 55 | 1  | 0 | -6.113777 | -3.003929 | -2.282720 |
| 56 | 1  | 0 | -5.989214 | -0.650294 | -3.052130 |
| 57 | 1  | 0 | -4.369114 | 0.916354  | -2.018094 |
| 58 | 30 | 0 | -3.321390 | 2.164442  | 0.629035  |
| 59 | 17 | 0 | -1.585768 | 3.025574  | 1.584543  |
| 60 | 17 | 0 | -5.312833 | 2.698508  | 0.063821  |

**trans-exo-IM1-III**

Standard orientation:

| Center Number | Atomic Number | Atomic Type | Coordinates (Angstroms) |           |           |
|---------------|---------------|-------------|-------------------------|-----------|-----------|
|               |               |             | X                       | Y         | Z         |
| 1             | 6             | 0           | 2.367896                | -0.151287 | 0.941117  |
| 2             | 7             | 0           | 0.206320                | -0.165734 | 0.053463  |
| 3             | 6             | 0           | 0.978220                | 0.186674  | 1.057276  |
| 4             | 6             | 0           | 0.524022                | 0.932694  | 2.274018  |
| 5             | 6             | 0           | 2.982432                | -0.441511 | -0.265541 |
| 6             | 6             | 0           | 0.760887                | -1.007329 | -1.038700 |
| 7             | 6             | 0           | 2.138221                | -0.544936 | -1.490073 |
| 8             | 1             | 0           | 0.027937                | 1.858478  | 1.985165  |
| 9             | 1             | 0           | 1.387576                | 1.181570  | 2.885517  |
| 10            | 1             | 0           | -0.182983               | 0.348169  | 2.862572  |
| 11            | 6             | 0           | 4.377144                | -0.500259 | -0.027428 |
| 12            | 6             | 0           | 4.555796                | -0.260559 | 1.356032  |

Imaginary frequency: none  
 Electronic energy  $E = -4189.664942$  a.u.  
 Enthalpy  $H = -4189.630607$  a.u.  
 Entropy  $S = 217.434$  cal/mol/K  
 Gibbs free energy  $G = -4189.733917$  a.u.  
 Total free energy in solution  $E_{\text{sol}} = -4190.86620$  a.u.

|    |    |   |           |           |           |
|----|----|---|-----------|-----------|-----------|
| 13 | 7  | 0 | 3.333556  | -0.018483 | 1.921791  |
| 14 | 1  | 0 | 3.165024  | 0.056419  | 2.909595  |
| 15 | 1  | 0 | 0.046662  | -0.986421 | -1.858392 |
| 16 | 1  | 0 | 0.820704  | -2.026887 | -0.648216 |
| 17 | 1  | 0 | 2.082576  | 0.418710  | -2.007463 |
| 18 | 1  | 0 | 2.533324  | -1.275035 | -2.197869 |
| 19 | 6  | 0 | 5.489962  | -0.744557 | -0.864085 |
| 20 | 6  | 0 | 6.738522  | -0.756043 | -0.281998 |
| 21 | 6  | 0 | 6.899430  | -0.532001 | 1.114646  |
| 22 | 6  | 0 | 5.832789  | -0.287480 | 1.941661  |
| 23 | 1  | 0 | 5.346295  | -0.915110 | -1.921009 |
| 24 | 1  | 0 | 5.976533  | -0.112722 | 2.999667  |
| 25 | 1  | 0 | 7.908932  | -0.558194 | 1.502167  |
| 26 | 8  | 0 | 7.902378  | -0.972648 | -0.943656 |
| 27 | 6  | 0 | 7.820352  | -1.182385 | -2.342512 |
| 28 | 1  | 0 | 7.230946  | -2.074469 | -2.569340 |
| 29 | 1  | 0 | 7.380535  | -0.314840 | -2.840892 |
| 30 | 1  | 0 | 8.841238  | -1.322779 | -2.685293 |
| 31 | 6  | 0 | -2.508825 | 0.638374  | 1.920817  |
| 32 | 6  | 0 | -2.510504 | -0.858337 | 2.052167  |
| 33 | 6  | 0 | -1.921778 | 1.129045  | 0.720807  |
| 34 | 6  | 0 | -1.250940 | 0.197568  | -0.182553 |
| 35 | 6  | 0 | -2.199253 | -1.678805 | 0.976453  |
| 36 | 8  | 0 | -1.901526 | -1.094752 | -0.267478 |
| 37 | 8  | 0 | -2.936804 | 1.325293  | 2.852835  |
| 38 | 6  | 0 | -1.779112 | 2.528774  | 0.501381  |
| 39 | 6  | 0 | -0.964411 | 3.132834  | -0.402256 |
| 40 | 1  | 0 | -1.243378 | 0.574140  | -1.204932 |
| 41 | 1  | 0 | -2.358550 | 3.152753  | 1.173295  |
| 42 | 6  | 0 | -0.863591 | 4.580006  | -0.563645 |
| 43 | 8  | 0 | -0.108050 | 5.133174  | -1.337954 |
| 44 | 1  | 0 | -0.316332 | 2.584076  | -1.075970 |
| 45 | 8  | 0 | -1.691875 | 5.273705  | 0.253320  |
| 46 | 6  | 0 | -1.598089 | 6.691215  | 0.119232  |
| 47 | 1  | 0 | -0.589931 | 7.031233  | 0.352613  |
| 48 | 1  | 0 | -1.843857 | 6.994569  | -0.897246 |
| 49 | 1  | 0 | -2.314426 | 7.100988  | 0.825693  |
| 50 | 6  | 0 | -2.836247 | -1.466575 | 3.263113  |
| 51 | 6  | 0 | -2.847411 | -2.851510 | 3.376341  |
| 52 | 6  | 0 | -2.536470 | -3.646238 | 2.273394  |
| 53 | 6  | 0 | -2.206029 | -3.060272 | 1.054952  |
| 54 | 1  | 0 | -3.095354 | -0.815841 | 4.088297  |
| 55 | 1  | 0 | -3.109470 | -3.316259 | 4.317680  |
| 56 | 1  | 0 | -2.554385 | -4.724911 | 2.356649  |
| 57 | 1  | 0 | -1.975490 | -3.655223 | 0.180158  |
| 58 | 30 | 0 | -3.279357 | -1.247397 | -1.764680 |
| 59 | 17 | 0 | -2.128097 | -0.590417 | -3.477507 |
| 60 | 17 | 0 | -5.067997 | -2.238509 | -1.156792 |

**trans-exo-TS2-III**

Standard orientation:

| Center Number | Atomic Number | Atomic Type | Coordinates (Angstroms) |           |          |
|---------------|---------------|-------------|-------------------------|-----------|----------|
|               |               |             | X                       | Y         | Z        |
| 1             | 6             | 0           | 2.006023                | 0.427784  | 1.057665 |
| 2             | 7             | 0           | -0.272686               | -0.084086 | 0.697920 |
| 3             | 6             | 0           | 0.652917                | 0.858413  | 0.925704 |
| 4             | 6             | 0           | 0.287563                | 2.246631  | 1.354747 |
| 5             | 6             | 0           | 2.465677                | -0.811920 | 0.643926 |
| 6             | 6             | 0           | 0.145055                | -1.499464 | 0.834721 |

Imaginary frequency: -39.9693 cm<sup>-1</sup>  
 Electronic energy  $E = -4189.65906$  a.u.  
 Enthalpy  $H = -4189.62463$  a.u.  
 Entropy  $S = 216.278$  cal/mol/K  
 Gibbs free energy  $G = -4189.72739$  a.u.  
 Total free energy in solution  $E_{\text{sol}} = -4190.85315$  a.u.

|    |    |   |           |           |           |
|----|----|---|-----------|-----------|-----------|
| 7  | 6  | 0 | 1.478272  | -1.825654 | 0.164471  |
| 8  | 1  | 0 | 0.938689  | 2.985886  | 0.889129  |
| 9  | 1  | 0 | 0.419183  | 2.276265  | 2.442386  |
| 10 | 1  | 0 | -0.745948 | 2.492096  | 1.143631  |
| 11 | 6  | 0 | 3.877733  | -0.788045 | 0.744200  |
| 12 | 6  | 0 | 4.225053  | 0.493616  | 1.237761  |
| 13 | 7  | 0 | 3.077010  | 1.214673  | 1.426947  |
| 14 | 1  | 0 | 3.033847  | 2.178752  | 1.705308  |
| 15 | 1  | 0 | -0.656978 | -2.115434 | 0.437746  |
| 16 | 1  | 0 | 0.232002  | -1.686150 | 1.907099  |
| 17 | 1  | 0 | 1.396178  | -1.810314 | -0.927690 |
| 18 | 1  | 0 | 1.765914  | -2.839994 | 0.447756  |
| 19 | 6  | 0 | 4.881074  | -1.742173 | 0.463858  |
| 20 | 6  | 0 | 6.192127  | -1.379881 | 0.683919  |
| 21 | 6  | 0 | 6.523500  | -0.091150 | 1.184106  |
| 22 | 6  | 0 | 5.563034  | 0.848260  | 1.466892  |
| 23 | 1  | 0 | 4.608952  | -2.714840 | 0.080996  |
| 24 | 1  | 0 | 5.834509  | 1.825570  | 1.843655  |
| 25 | 1  | 0 | 7.573226  | 0.123524  | 1.332381  |
| 26 | 8  | 0 | 7.267856  | -2.179567 | 0.459008  |
| 27 | 6  | 0 | 7.010833  | -3.468106 | -0.066960 |
| 28 | 1  | 0 | 6.400817  | -4.057955 | 0.622493  |
| 29 | 1  | 0 | 6.507255  | -3.401171 | -1.034761 |
| 30 | 1  | 0 | 7.980517  | -3.941633 | -0.191473 |
| 31 | 6  | 0 | -2.650073 | 2.284693  | -0.430812 |
| 32 | 6  | 0 | -3.469734 | 1.692850  | 0.673298  |
| 33 | 6  | 0 | -1.564483 | 1.454736  | -0.882773 |
| 34 | 6  | 0 | -1.374907 | 0.102734  | -0.336586 |
| 35 | 6  | 0 | -3.360508 | 0.350084  | 1.009054  |
| 36 | 8  | 0 | -2.570690 | -0.489836 | 0.203490  |
| 37 | 8  | 0 | -2.856852 | 3.437272  | -0.803230 |
| 38 | 6  | 0 | -0.454437 | 2.054187  | -1.493045 |
| 39 | 6  | 0 | 0.763869  | 1.441152  | -1.669852 |
| 40 | 1  | 0 | -1.069063 | -0.593600 | -1.117961 |
| 41 | 1  | 0 | -0.544159 | 3.118107  | -1.686173 |
| 42 | 6  | 0 | 2.003054  | 2.145380  | -1.956315 |
| 43 | 8  | 0 | 3.080824  | 1.606516  | -2.117610 |
| 44 | 1  | 0 | 0.883151  | 0.367279  | -1.648889 |
| 45 | 8  | 0 | 1.867134  | 3.497239  | -1.948107 |
| 46 | 6  | 0 | 3.070730  | 4.208527  | -2.239935 |
| 47 | 1  | 0 | 3.837840  | 3.980650  | -1.500547 |
| 48 | 1  | 0 | 3.445147  | 3.935040  | -3.225044 |
| 49 | 1  | 0 | 2.805391  | 5.261506  | -2.209447 |
| 50 | 6  | 0 | -4.315647 | 2.494598  | 1.438327  |
| 51 | 6  | 0 | -5.022084 | 1.952758  | 2.504045  |
| 52 | 6  | 0 | -4.886141 | 0.600593  | 2.817568  |
| 53 | 6  | 0 | -4.046809 | -0.217303 | 2.067453  |
| 54 | 1  | 0 | -4.395887 | 3.537867  | 1.162484  |
| 55 | 1  | 0 | -5.681680 | 2.578083  | 3.091059  |
| 56 | 1  | 0 | -5.438613 | 0.175229  | 3.644884  |
| 57 | 1  | 0 | -3.944127 | -1.272729 | 2.281171  |
| 58 | 30 | 0 | -3.460918 | -1.995762 | -0.844597 |
| 59 | 17 | 0 | -1.839885 | -2.971309 | -1.896653 |
| 60 | 17 | 0 | -5.531009 | -2.229637 | -0.370841 |

**trans-exo-IM2-III**

Standard orientation:

| Center Number                             | Atomic Number | Atomic Type | Coordinates (Angstroms) |   |   |  |
|-------------------------------------------|---------------|-------------|-------------------------|---|---|--|
|                                           |               |             | X                       | Y | Z |  |
| -----                                     |               |             |                         |   |   |  |
| Imaginary frequency: none                 |               |             |                         |   |   |  |
| Electronic energy $E = -4189.704039$ a.u. |               |             |                         |   |   |  |
| Enthalpy $H = -4189.670446$ a.u.          |               |             |                         |   |   |  |
| Entropy $S = 210.230$ cal/mol/K           |               |             |                         |   |   |  |
| Gibbs free energy $G = -4189.770333$ a.u. |               |             |                         |   |   |  |

Total free energy in solution  $E_{\text{sol}} = -4190.88746$  a.u.

---

|    |    |   |           |           |           |
|----|----|---|-----------|-----------|-----------|
| 1  | 6  | 0 | -1.744516 | 1.166996  | -0.548269 |
| 2  | 7  | 0 | 0.625270  | 0.712579  | -0.971045 |
| 3  | 6  | 0 | -0.386940 | 1.791064  | -0.781469 |
| 4  | 6  | 0 | -0.360326 | 2.658836  | -2.047853 |
| 5  | 6  | 0 | -2.046564 | -0.168855 | -0.628733 |
| 6  | 6  | 0 | 0.099061  | -0.429078 | -1.739082 |
| 7  | 6  | 0 | -1.028408 | -1.179793 | -1.028359 |
| 8  | 1  | 0 | -1.167764 | 3.392525  | -2.035015 |
| 9  | 1  | 0 | -0.497324 | 2.035243  | -2.929657 |
| 10 | 1  | 0 | 0.603114  | 3.164618  | -2.122386 |
| 11 | 6  | 0 | -3.435013 | -0.307588 | -0.301503 |
| 12 | 6  | 0 | -3.914376 | 0.990821  | -0.038184 |
| 13 | 7  | 0 | -2.869416 | 1.875136  | -0.203735 |
| 14 | 1  | 0 | -2.873793 | 2.860340  | 0.020395  |
| 15 | 1  | 0 | 0.929868  | -1.084020 | -1.994880 |
| 16 | 1  | 0 | -0.293164 | -0.036239 | -2.676130 |
| 17 | 1  | 0 | -0.672161 | -1.718282 | -0.133690 |
| 18 | 1  | 0 | -1.434205 | -1.949500 | -1.688678 |
| 19 | 6  | 0 | -4.298797 | -1.414608 | -0.214777 |
| 20 | 6  | 0 | -5.616340 | -1.183034 | 0.139164  |
| 21 | 6  | 0 | -6.083407 | 0.125015  | 0.403262  |
| 22 | 6  | 0 | -5.248167 | 1.217799  | 0.317928  |
| 23 | 1  | 0 | -3.926880 | -2.409432 | -0.414993 |
| 24 | 1  | 0 | -5.616757 | 2.215085  | 0.521524  |
| 25 | 1  | 0 | -7.123972 | 0.236745  | 0.676211  |
| 26 | 8  | 0 | -6.564139 | -2.157194 | 0.264089  |
| 27 | 6  | 0 | -6.147857 | -3.488460 | 0.038369  |
| 28 | 1  | 0 | -5.786515 | -3.621009 | -0.985371 |
| 29 | 1  | 0 | -5.361271 | -3.779801 | 0.739946  |
| 30 | 1  | 0 | -7.025239 | -4.110359 | 0.196540  |
| 31 | 6  | 0 | 3.505999  | 1.407357  | 1.033343  |
| 32 | 6  | 0 | 4.183605  | 0.306827  | 0.316975  |
| 33 | 6  | 0 | 2.040931  | 1.466338  | 0.809933  |
| 34 | 6  | 0 | 1.254740  | 0.305804  | 0.278068  |
| 35 | 6  | 0 | 3.442541  | -0.728783 | -0.246002 |
| 36 | 8  | 0 | 2.081324  | -0.856896 | 0.028675  |
| 37 | 8  | 0 | 4.108350  | 2.266011  | 1.646681  |
| 38 | 6  | 0 | 1.408776  | 2.635342  | 0.869206  |
| 39 | 6  | 0 | -0.037379 | 2.688890  | 0.491243  |
| 40 | 1  | 0 | 0.540728  | -0.057953 | 1.028661  |
| 41 | 1  | 0 | 1.939550  | 3.523678  | 1.183568  |
| 42 | 6  | 0 | -0.545573 | 4.106334  | 0.286637  |
| 43 | 8  | 0 | -1.713674 | 4.427941  | 0.345578  |
| 44 | 1  | 0 | -0.626430 | 2.286657  | 1.322236  |
| 45 | 8  | 0 | 0.424466  | 4.972076  | 0.006925  |
| 46 | 6  | 0 | -0.012104 | 6.321249  | -0.238227 |
| 47 | 1  | 0 | -0.673005 | 6.341074  | -1.102289 |
| 48 | 1  | 0 | -0.540011 | 6.703306  | 0.632311  |
| 49 | 1  | 0 | 0.894327  | 6.886221  | -0.426532 |
| 50 | 6  | 0 | 5.564312  | 0.338277  | 0.115808  |
| 51 | 6  | 0 | 6.184944  | -0.647447 | -0.636162 |
| 52 | 6  | 0 | 5.418217  | -1.665839 | -1.201994 |
| 53 | 6  | 0 | 4.039907  | -1.715836 | -1.015431 |
| 54 | 1  | 0 | 6.117107  | 1.155250  | 0.560762  |
| 55 | 1  | 0 | 7.255190  | -0.623529 | -0.789796 |
| 56 | 1  | 0 | 5.892551  | -2.433195 | -1.799657 |
| 57 | 1  | 0 | 3.442272  | -2.503720 | -1.454753 |
| 58 | 30 | 0 | 1.192902  | -2.672343 | 0.469233  |
| 59 | 17 | 0 | 0.574772  | -2.478530 | 2.522913  |
| 60 | 17 | 0 | 1.296495  | -4.063748 | -1.177077 |

---

**trans-COM-IV**

Standard orientation:

| Center Number | Atomic Number | Atomic Type | Coordinates (Angstroms) |           |           |
|---------------|---------------|-------------|-------------------------|-----------|-----------|
|               |               |             | X                       | Y         | Z         |
| 1             | 30            | 0           | -1.402644               | -1.941182 | 0.205145  |
| 2             | 17            | 0           | -1.304249               | -1.600542 | 2.338815  |
| 3             | 17            | 0           | -2.558392               | -3.056065 | -1.238307 |
| 4             | 6             | 0           | -0.192990               | 0.611328  | -0.425465 |
| 5             | 6             | 0           | -1.420935               | 1.385363  | -0.367353 |
| 6             | 6             | 0           | 1.040837                | 1.343887  | -0.256183 |
| 7             | 6             | 0           | 0.971963                | 2.678467  | -0.014607 |
| 8             | 6             | 0           | -1.355130               | 2.748824  | -0.071489 |
| 9             | 8             | 0           | -0.156878               | 3.376051  | 0.101876  |
| 10            | 8             | 0           | -0.182639               | -0.624385 | -0.622286 |
| 11            | 6             | 0           | 2.318274                | 0.627972  | -0.340733 |
| 12            | 6             | 0           | 3.430152                | 0.994089  | 0.302418  |
| 13            | 1             | 0           | 1.842899                | 3.307399  | 0.103097  |
| 14            | 1             | 0           | 2.324343                | -0.260771 | -0.958687 |
| 15            | 6             | 0           | 4.719636                | 0.276441  | 0.166932  |
| 16            | 8             | 0           | 5.730440                | 0.624389  | 0.730166  |
| 17            | 1             | 0           | 3.468692                | 1.832322  | 0.986872  |
| 18            | 8             | 0           | 4.645671                | -0.791122 | -0.640906 |
| 19            | 6             | 0           | 5.873709                | -1.518942 | -0.778316 |
| 20            | 1             | 0           | 6.644318                | -0.875527 | -1.198400 |
| 21            | 1             | 0           | 6.201287                | -1.884140 | 0.192872  |
| 22            | 1             | 0           | 5.649458                | -2.343660 | -1.447060 |
| 23            | 6             | 0           | -2.682937               | 0.805280  | -0.587359 |
| 24            | 6             | 0           | -3.823788               | 1.570926  | -0.480779 |
| 25            | 6             | 0           | -3.729157               | 2.933705  | -0.154267 |
| 26            | 6             | 0           | -2.500702               | 3.533624  | 0.045081  |
| 27            | 1             | 0           | -2.751378               | -0.234530 | -0.883846 |
| 28            | 1             | 0           | -4.791736               | 1.121606  | -0.653855 |
| 29            | 1             | 0           | -4.629799               | 3.526800  | -0.066344 |
| 30            | 1             | 0           | -2.400226               | 4.583025  | 0.284291  |

Imaginary frequency: -470.2858 cm<sup>-1</sup>  
 Electronic energy  $E = -3501.484084$  a.u.  
 Enthalpy  $H = -3501.462982$  a.u.  
 Entropy  $S = 158.706$  cal/mol/K  
 Gibbs free energy  $G = -3501.538388$  a.u.  
 Total free energy in solution  $E_{\text{sol}} = -4190.85265$  a.u.

**trans-endo-TS1-IV**

Standard orientation:

| Center Number | Atomic Number | Atomic Type | Coordinates (Angstroms) |          |           |
|---------------|---------------|-------------|-------------------------|----------|-----------|
|               |               |             | X                       | Y        | Z         |
| 1             | 6             | 0           | 0.920310                | 2.395856 | -1.041138 |
| 2             | 7             | 0           | -1.452879               | 2.380420 | -0.930894 |
| 3             | 6             | 0           | -0.333066               | 2.978412 | -0.633117 |
| 4             | 6             | 0           | -0.329835               | 4.288283 | 0.103117  |
| 5             | 6             | 0           | 1.008556                | 1.092912 | -1.486318 |
| 6             | 6             | 0           | -1.390791               | 1.296542 | -1.927493 |
| 7             | 6             | 0           | -0.224738               | 0.311909 | -1.790391 |
| 8             | 1             | 0           | 0.402797                | 4.298405 | 0.911228  |
| 9             | 1             | 0           | -1.318661               | 4.532532 | 0.487176  |
| 10            | 1             | 0           | -0.060167               | 5.069173 | -0.614741 |
| 11            | 6             | 0           | 2.380356                | 0.727594 | -1.435883 |
| 12            | 6             | 0           | 3.083813                | 1.868251 | -0.984715 |
| 13            | 7             | 0           | 2.184605                | 2.888193 | -0.774526 |
| 14            | 1             | 0           | 2.372403                | 3.667071 | -0.165072 |
| 15            | 1             | 0           | -1.303545               | 1.800775 | -2.894274 |
| 16            | 1             | 0           | -2.346479               | 0.777012 | -1.919464 |

Imaginary frequency: -232.2591 cm<sup>-1</sup>  
 Electronic energy  $E = -4189.697289$  a.u.  
 Enthalpy  $H = -4189.662800$  a.u.  
 Entropy  $S = 213.613$  cal/mol/K  
 Gibbs free energy  $G = -4189.764294$  a.u.  
 Total free energy in solution  $E_{\text{sol}} = -4190.87613$  a.u.



|    |    |   |           |           |           |
|----|----|---|-----------|-----------|-----------|
| 17 | 1  | 0 | -0.128324 | -0.245395 | -2.724788 |
| 18 | 1  | 0 | -0.398459 | -0.441562 | -1.019527 |
| 19 | 6  | 0 | 3.052671  | -0.484660 | -1.693099 |
| 20 | 6  | 0 | 4.416518  | -0.516224 | -1.483021 |
| 21 | 6  | 0 | 5.117701  | 0.642797  | -1.054879 |
| 22 | 6  | 0 | 4.475078  | 1.834634  | -0.806658 |
| 23 | 8  | 0 | 5.194664  | -1.615543 | -1.653296 |
| 24 | 6  | 0 | 4.526034  | -2.819256 | -2.001199 |
| 25 | 1  | 0 | 2.491448  | -1.353851 | -2.005054 |
| 26 | 1  | 0 | 6.187328  | 0.550212  | -0.920375 |
| 27 | 1  | 0 | 5.024175  | 2.704362  | -0.469711 |
| 28 | 1  | 0 | 4.048006  | -2.730215 | -2.979979 |
| 29 | 1  | 0 | 5.293701  | -3.587182 | -2.037877 |
| 30 | 1  | 0 | 3.771462  | -3.079679 | -1.255153 |
| 31 | 6  | 0 | -2.587782 | -0.543063 | 0.535293  |
| 32 | 6  | 0 | -3.895342 | -0.477058 | -0.119256 |
| 33 | 6  | 0 | -2.034785 | 0.673849  | 0.983561  |
| 34 | 6  | 0 | -2.622128 | 1.895665  | 0.549720  |
| 35 | 6  | 0 | -4.486587 | 0.766736  | -0.338987 |
| 36 | 8  | 0 | -3.867668 | 1.929958  | 0.044083  |
| 37 | 8  | 0 | -2.033174 | -1.677341 | 0.664614  |
| 38 | 6  | 0 | -0.736767 | 0.694252  | 1.611746  |
| 39 | 6  | 0 | -0.102714 | 1.784500  | 2.075838  |
| 40 | 1  | 0 | -2.416683 | 2.810101  | 1.081819  |
| 41 | 1  | 0 | -0.197829 | -0.244060 | 1.643610  |
| 42 | 6  | 0 | 1.344802  | 1.794289  | 2.348799  |
| 43 | 8  | 0 | 2.001432  | 2.821050  | 2.368154  |
| 44 | 1  | 0 | -0.574460 | 2.752561  | 2.155455  |
| 45 | 8  | 0 | 1.856311  | 0.575381  | 2.493191  |
| 46 | 6  | 0 | 3.280317  | 0.491742  | 2.632939  |
| 47 | 1  | 0 | 3.762852  | 0.849800  | 1.724944  |
| 48 | 1  | 0 | 3.606112  | 1.086161  | 3.484270  |
| 49 | 1  | 0 | 3.485014  | -0.562138 | 2.789643  |
| 50 | 6  | 0 | -4.568278 | -1.628266 | -0.545472 |
| 51 | 6  | 0 | -5.804156 | -1.524451 | -1.158668 |
| 52 | 6  | 0 | -6.381105 | -0.265123 | -1.359048 |
| 53 | 6  | 0 | -5.726429 | 0.888506  | -0.954471 |
| 54 | 1  | 0 | -4.093533 | -2.585360 | -0.379530 |
| 55 | 1  | 0 | -6.323813 | -2.415104 | -1.484700 |
| 56 | 1  | 0 | -7.347693 | -0.185001 | -1.839056 |
| 57 | 1  | 0 | -6.147014 | 1.873290  | -1.104101 |
| 58 | 30 | 0 | -0.309032 | -2.538152 | 0.777743  |
| 59 | 17 | 0 | 0.583956  | -2.741950 | 2.745106  |
| 60 | 17 | 0 | 0.407679  | -3.220253 | -1.177827 |

**trans-endo-IM1-IV**

Standard orientation:

| Center Number | Atomic Number | Atomic Type | Coordinates (Angstroms) |           |           |
|---------------|---------------|-------------|-------------------------|-----------|-----------|
|               |               |             | X                       | Y         | Z         |
| 1             | 6             | 0           | -0.982916               | -2.505748 | -0.720552 |
| 2             | 7             | 0           | 1.358564                | -2.355235 | -0.510083 |
| 3             | 6             | 0           | 0.233787                | -2.959998 | -0.143088 |
| 4             | 6             | 0           | 0.215562                | -4.144417 | 0.778623  |
| 5             | 6             | 0           | -1.072515               | -1.292143 | -1.390102 |
| 6             | 6             | 0           | 1.326741                | -1.550169 | -1.749845 |
| 7             | 6             | 0           | 0.152958                | -0.576118 | -1.841407 |
| 8             | 1             | 0           | -0.551235               | -4.036825 | 1.546268  |
| 9             | 1             | 0           | 1.179591                | -4.334774 | 1.242422  |
| 10            | 1             | 0           | -0.027844               | -5.014071 | 0.160188  |

Imaginary frequency: none

Electronic energy  $E = -4189.703272$  a.u.

Enthalpy  $H = -4189.668848$  a.u.

Entropy  $S = 211.812$  cal/mol/K

Gibbs free energy  $G = -4189.769486$  a.u.

Total free energy in solution  $E_{\text{sol}} = -4190.88710$  a.u.

|    |    |   |           |           |           |
|----|----|---|-----------|-----------|-----------|
| 11 | 6  | 0 | -2.438147 | -0.926592 | -1.405710 |
| 12 | 6  | 0 | -3.142217 | -1.972537 | -0.762162 |
| 13 | 7  | 0 | -2.254058 | -2.949973 | -0.383344 |
| 14 | 1  | 0 | -2.436382 | -3.549862 | 0.406608  |
| 15 | 1  | 0 | 1.250836  | -2.275067 | -2.562990 |
| 16 | 1  | 0 | 2.279981  | -1.038987 | -1.840462 |
| 17 | 1  | 0 | 0.061085  | -0.251975 | -2.880894 |
| 18 | 1  | 0 | 0.301313  | 0.332316  | -1.255788 |
| 19 | 6  | 0 | -3.102908 | 0.233467  | -1.858002 |
| 20 | 6  | 0 | -4.460793 | 0.312846  | -1.638096 |
| 21 | 6  | 0 | -5.164709 | -0.757084 | -1.015141 |
| 22 | 6  | 0 | -4.532163 | -1.896135 | -0.576179 |
| 23 | 8  | 0 | -5.233985 | 1.375123  | -1.967541 |
| 24 | 6  | 0 | -4.560463 | 2.517731  | -2.480136 |
| 25 | 1  | 0 | -2.535231 | 1.037539  | -2.303101 |
| 26 | 1  | 0 | -6.231461 | -0.630538 | -0.884691 |
| 27 | 1  | 0 | -5.083392 | -2.689985 | -0.089793 |
| 28 | 1  | 0 | -4.098288 | 2.294606  | -3.444948 |
| 29 | 1  | 0 | -5.323231 | 3.280158  | -2.608158 |
| 30 | 1  | 0 | -3.795461 | 2.865423  | -1.782179 |
| 31 | 6  | 0 | 2.618567  | 0.557376  | 0.405718  |
| 32 | 6  | 0 | 3.885545  | 0.315799  | -0.301712 |
| 33 | 6  | 0 | 1.977509  | -0.548285 | 0.961276  |
| 34 | 6  | 0 | 2.380142  | -1.927436 | 0.544228  |
| 35 | 6  | 0 | 4.359282  | -0.990489 | -0.441457 |
| 36 | 8  | 0 | 3.668927  | -2.078239 | 0.028161  |
| 37 | 8  | 0 | 2.204198  | 1.766392  | 0.480732  |
| 38 | 6  | 0 | 0.737871  | -0.409460 | 1.651852  |
| 39 | 6  | 0 | 0.054780  | -1.414127 | 2.248693  |
| 40 | 1  | 0 | 2.290926  | -2.653884 | 1.344562  |
| 41 | 1  | 0 | 0.257923  | 0.561762  | 1.636774  |
| 42 | 6  | 0 | -1.379547 | -1.346423 | 2.529345  |
| 43 | 8  | 0 | -2.072822 | -2.345240 | 2.662916  |
| 44 | 1  | 0 | 0.493912  | -2.380695 | 2.434354  |
| 45 | 8  | 0 | -1.865898 | -0.105231 | 2.535454  |
| 46 | 6  | 0 | -3.286706 | 0.016699  | 2.668820  |
| 47 | 1  | 0 | -3.779879 | -0.414368 | 1.798192  |
| 48 | 1  | 0 | -3.622608 | -0.492301 | 3.569951  |
| 49 | 1  | 0 | -3.474970 | 1.083564  | 2.729301  |
| 50 | 6  | 0 | 4.642370  | 1.368909  | -0.822975 |
| 51 | 6  | 0 | 5.849468  | 1.121407  | -1.458007 |
| 52 | 6  | 0 | 6.309669  | -0.191152 | -1.578622 |
| 53 | 6  | 0 | 5.567817  | -1.252254 | -1.075331 |
| 54 | 1  | 0 | 4.257367  | 2.372511  | -0.706832 |
| 55 | 1  | 0 | 6.432112  | 1.941146  | -1.855858 |
| 56 | 1  | 0 | 7.252297  | -0.391011 | -2.071619 |
| 57 | 1  | 0 | 5.901738  | -2.277169 | -1.161999 |
| 58 | 30 | 0 | 0.522008  | 2.666611  | 0.647197  |
| 59 | 17 | 0 | -0.161773 | 3.306381  | 2.606762  |
| 60 | 17 | 0 | -0.492824 | 2.940452  | -1.293772 |

**trans-endo-TS2-IV**

Standard orientation:

Imaginary frequency: -280.7259 cm<sup>-1</sup>

Electronic energy  $E = -4189.696145$  a.u.

Enthalpy  $H = -4189.662511$  a.u.

Center Atomic Atomic Coordinates (Angstroms)  
Number Number Type X Y Z

Entropy  $S = 209.451$  cal/mol/K  
Gibbs free energy  $G = -4189.762028$  a.u.

Total free energy in solution  $E_{\text{sol}} = -4190.87591$  a.u.

---

|    |    |   |           |           |           |
|----|----|---|-----------|-----------|-----------|
| 1  | 6  | 0 | 1.093476  | 2.164783  | -0.673129 |
| 2  | 7  | 0 | -1.286020 | 2.277549  | -0.765212 |
| 3  | 6  | 0 | -0.136616 | 2.750563  | -0.176000 |
| 4  | 6  | 0 | -0.124065 | 4.191166  | 0.280896  |
| 5  | 6  | 0 | 1.156625  | 0.956265  | -1.327952 |
| 6  | 6  | 0 | -1.167386 | 1.356942  | -1.918905 |
| 7  | 6  | 0 | -0.087444 | 0.280961  | -1.803896 |
| 8  | 1  | 0 | 0.618461  | 4.353826  | 1.061423  |
| 9  | 1  | 0 | -1.101526 | 4.499653  | 0.649797  |
| 10 | 1  | 0 | 0.113473  | 4.811221  | -0.587492 |
| 11 | 6  | 0 | 2.529772  | 0.588100  | -1.390324 |
| 12 | 6  | 0 | 3.256422  | 1.634299  | -0.777998 |
| 13 | 7  | 0 | 2.366873  | 2.602579  | -0.365135 |
| 14 | 1  | 0 | 2.572976  | 3.291986  | 0.340561  |
| 15 | 1  | 0 | -0.931882 | 1.989999  | -2.776623 |
| 16 | 1  | 0 | -2.149254 | 0.924482  | -2.094693 |
| 17 | 1  | 0 | 0.060901  | -0.164972 | -2.790546 |
| 18 | 1  | 0 | -0.374896 | -0.539143 | -1.144346 |
| 19 | 6  | 0 | 3.189664  | -0.556562 | -1.877967 |
| 20 | 6  | 0 | 4.561197  | -0.619602 | -1.729606 |
| 21 | 6  | 0 | 5.283571  | 0.448655  | -1.138563 |
| 22 | 6  | 0 | 4.652537  | 1.577187  | -0.664518 |
| 23 | 8  | 0 | 5.328498  | -1.674837 | -2.113118 |
| 24 | 6  | 0 | 4.643697  | -2.814249 | -2.605668 |
| 25 | 1  | 0 | 2.615124  | -1.365166 | -2.305994 |
| 26 | 1  | 0 | 6.357083  | 0.337881  | -1.063204 |
| 27 | 1  | 0 | 5.217370  | 2.381261  | -0.209884 |
| 28 | 1  | 0 | 4.123421  | -2.585026 | -3.539450 |
| 29 | 1  | 0 | 5.406309  | -3.565954 | -2.789996 |
| 30 | 1  | 0 | 3.924537  | -3.186130 | -1.871598 |
| 31 | 6  | 0 | -2.683580 | -0.507081 | 0.425371  |
| 32 | 6  | 0 | -3.887557 | -0.383052 | -0.389775 |
| 33 | 6  | 0 | -2.068461 | 0.711497  | 0.844861  |
| 34 | 6  | 0 | -2.416782 | 2.003822  | 0.174044  |
| 35 | 6  | 0 | -4.314551 | 0.886628  | -0.800209 |
| 36 | 8  | 0 | -3.643229 | 2.035473  | -0.514315 |
| 37 | 8  | 0 | -2.252476 | -1.653543 | 0.721858  |
| 38 | 6  | 0 | -0.898578 | 0.710104  | 1.572684  |
| 39 | 6  | 0 | -0.209230 | 1.899747  | 1.839745  |
| 40 | 1  | 0 | -2.449295 | 2.840343  | 0.867681  |
| 41 | 1  | 0 | -0.423252 | -0.227121 | 1.832397  |
| 42 | 6  | 0 | 1.185386  | 1.870097  | 2.302916  |
| 43 | 8  | 0 | 1.817456  | 2.863906  | 2.619865  |
| 44 | 1  | 0 | -0.749515 | 2.788690  | 2.129388  |
| 45 | 8  | 0 | 1.708833  | 0.644516  | 2.246576  |
| 46 | 6  | 0 | 3.074278  | 0.514373  | 2.664685  |
| 47 | 1  | 0 | 3.727394  | 1.006474  | 1.946086  |
| 48 | 1  | 0 | 3.204743  | 0.956316  | 3.649920  |
| 49 | 1  | 0 | 3.263887  | -0.553541 | 2.686566  |
| 50 | 6  | 0 | -4.627147 | -1.513149 | -0.766231 |
| 51 | 6  | 0 | -5.777887 | -1.378813 | -1.519356 |
| 52 | 6  | 0 | -6.197424 | -0.102032 | -1.909560 |
| 53 | 6  | 0 | -5.473927 | 1.027528  | -1.559279 |
| 54 | 1  | 0 | -4.269594 | -2.481369 | -0.443696 |
| 55 | 1  | 0 | -6.349193 | -2.251264 | -1.804803 |
| 56 | 1  | 0 | -7.098285 | 0.011207  | -2.499125 |
| 57 | 1  | 0 | -5.778810 | 2.019669  | -1.861958 |
| 58 | 30 | 0 | -0.534846 | -2.498868 | 1.099398  |
| 59 | 17 | 0 | 0.075117  | -2.576682 | 3.179247  |
| 60 | 17 | 0 | 0.391978  | -3.211633 | -0.743627 |

---

**trans-endo-IM2-IV**

Standard orientation:

Imaginary frequency: none

Electronic energy  $E = -4189.713892$  a.u.Enthalpy  $H = -4189.680353$  a.u.Entropy  $S = 209.369$  cal/mol/KGibbs free energy  $G = -4189.779831$  a.u.Total free energy in solution  $E_{\text{sol}} = -4190.89503$  a.u.

| Center Number | Atomic Number | Atomic Type | Coordinates (Angstroms) |           |           |
|---------------|---------------|-------------|-------------------------|-----------|-----------|
|               |               |             | X                       | Y         | Z         |
| 1             | 6             | 0           | 1.117119                | 1.871844  | -0.888328 |
| 2             | 7             | 0           | -1.270449               | 2.255922  | -1.241304 |
| 3             | 6             | 0           | -0.069797               | 2.703075  | -0.482133 |
| 4             | 6             | 0           | 0.126200                | 4.199451  | -0.730258 |
| 5             | 6             | 0           | 1.069416                | 0.613449  | -1.425414 |
| 6             | 6             | 0           | -1.048836               | 1.313133  | -2.350724 |
| 7             | 6             | 0           | -0.196053               | 0.084497  | -2.018561 |
| 8             | 1             | 0           | 0.940524                | 4.610686  | -0.134733 |
| 9             | 1             | 0           | -0.792829               | 4.727115  | -0.468411 |
| 10            | 1             | 0           | 0.322414                | 4.360174  | -1.790467 |
| 11            | 6             | 0           | 2.416318                | 0.117745  | -1.444245 |
| 12            | 6             | 0           | 3.233384                | 1.141554  | -0.924107 |
| 13            | 7             | 0           | 2.420942                | 2.211419  | -0.602778 |
| 14            | 1             | 0           | 2.716936                | 3.054065  | -0.139958 |
| 15            | 1             | 0           | -0.541318               | 1.872280  | -3.138872 |
| 16            | 1             | 0           | -2.029834               | 1.040141  | -2.734402 |
| 17            | 1             | 0           | 0.016472                | -0.462755 | -2.941202 |
| 18            | 1             | 0           | -0.717227               | -0.618943 | -1.363964 |
| 19            | 6             | 0           | 2.981614                | -1.104538 | -1.845055 |
| 20            | 6             | 0           | 4.348746                | -1.264991 | -1.703577 |
| 21            | 6             | 0           | 5.159185                | -0.223799 | -1.195887 |
| 22            | 6             | 0           | 4.618200                | 0.983047  | -0.805227 |
| 23            | 8             | 0           | 5.023322                | -2.406901 | -2.021331 |
| 24            | 6             | 0           | 4.242110                | -3.511323 | -2.437653 |
| 25            | 1             | 0           | 2.343461                | -1.896533 | -2.207919 |
| 26            | 1             | 0           | 6.221169                | -0.412363 | -1.115027 |
| 27            | 1             | 0           | 5.248665                | 1.773538  | -0.416917 |
| 28            | 1             | 0           | 3.727325                | -3.296868 | -3.378490 |
| 29            | 1             | 0           | 4.937806                | -4.333333 | -2.585197 |
| 30            | 1             | 0           | 3.505577                | -3.780657 | -1.675796 |
| 31            | 6             | 0           | -2.642879               | -0.473880 | 0.629552  |
| 32            | 6             | 0           | -3.850473               | -0.577817 | -0.158091 |
| 33            | 6             | 0           | -1.972763               | 0.818249  | 0.589837  |
| 34            | 6             | 0           | -2.378685               | 1.911538  | -0.363154 |
| 35            | 6             | 0           | -4.223560               | 0.484346  | -1.001167 |
| 36            | 8             | 0           | -3.536882               | 1.638635  | -1.138308 |
| 37            | 8             | 0           | -2.203621               | -1.440682 | 1.286168  |
| 38            | 6             | 0           | -0.894224               | 1.113157  | 1.326166  |
| 39            | 6             | 0           | -0.254669               | 2.444116  | 1.090621  |
| 40            | 1             | 0           | -2.622577               | 2.810315  | 0.209828  |
| 41            | 1             | 0           | -0.481847               | 0.436743  | 2.063958  |
| 42            | 6             | 0           | 1.078958                | 2.589077  | 1.808370  |
| 43            | 8             | 0           | 1.658961                | 3.643512  | 1.946698  |
| 44            | 1             | 0           | -0.897455               | 3.246281  | 1.473945  |
| 45            | 8             | 0           | 1.539630                | 1.420909  | 2.234750  |
| 46            | 6             | 0           | 2.824789                | 1.430598  | 2.876800  |
| 47            | 1             | 0           | 3.591548                | 1.665992  | 2.140605  |
| 48            | 1             | 0           | 2.833227                | 2.168489  | 3.675561  |
| 49            | 1             | 0           | 2.952965                | 0.425218  | 3.262375  |
| 50            | 6             | 0           | -4.626007               | -1.751696 | -0.129452 |
| 51            | 6             | 0           | -5.759462               | -1.861138 | -0.903704 |
| 52            | 6             | 0           | -6.124441               | -0.790943 | -1.734938 |
| 53            | 6             | 0           | -5.370161               | 0.366702  | -1.791567 |
| 54            | 1             | 0           | -4.299887               | -2.554524 | 0.517783  |
| 55            | 1             | 0           | -6.358424               | -2.760640 | -0.877848 |

|    |    |   |           |           |           |
|----|----|---|-----------|-----------|-----------|
| 56 | 1  | 0 | -7.011601 | -0.869676 | -2.350505 |
| 57 | 1  | 0 | -5.637886 | 1.193652  | -2.434448 |
| 58 | 30 | 0 | -0.350398 | -2.051185 | 1.616044  |
| 59 | 17 | 0 | 0.419419  | -1.614835 | 3.593000  |
| 60 | 17 | 0 | 0.275630  | -3.134032 | -0.155063 |

**trans-exo-TS1-IV**

Standard orientation:

| Center Number | Atomic Number | Atomic Type | Coordinates (Angstroms) |           |           |
|---------------|---------------|-------------|-------------------------|-----------|-----------|
|               |               |             | X                       | Y         | Z         |
| 1             | 6             | 0           | 1.176376                | -1.610573 | 1.185168  |
| 2             | 7             | 0           | -0.563292               | -2.639269 | -0.051550 |
| 3             | 6             | 0           | -0.211435               | -1.879750 | 0.944594  |
| 4             | 6             | 0           | -1.237473               | -1.228242 | 1.813529  |
| 5             | 6             | 0           | 2.170251                | -1.980963 | 0.301536  |
| 6             | 6             | 0           | 0.467268                | -3.483140 | -0.671293 |
| 7             | 6             | 0           | 1.859034                | -2.851956 | -0.867990 |
| 8             | 1             | 0           | -1.258275               | -0.145679 | 1.670761  |
| 9             | 1             | 0           | -0.956193               | -1.410569 | 2.854728  |
| 10            | 1             | 0           | -2.222436               | -1.654724 | 1.645240  |
| 11            | 6             | 0           | 3.332606                | -1.244966 | 0.658211  |
| 12            | 6             | 0           | 2.977295                | -0.451578 | 1.774358  |
| 13            | 7             | 0           | 1.671810                | -0.712047 | 2.111459  |
| 14            | 1             | 0           | 1.093157                | -0.043484 | 2.600052  |
| 15            | 1             | 0           | 0.075502                | -3.853313 | -1.620018 |
| 16            | 1             | 0           | 0.573774                | -4.347814 | -0.010852 |
| 17            | 1             | 0           | 1.942650                | -2.259543 | -1.782440 |
| 18            | 1             | 0           | 2.575002                | -3.672134 | -0.961231 |
| 19            | 6             | 0           | 4.624838                | -1.160507 | 0.097007  |
| 20            | 6             | 0           | 5.516078                | -0.277098 | 0.669367  |
| 21            | 6             | 0           | 5.145984                | 0.514666  | 1.790588  |
| 22            | 6             | 0           | 3.893467                | 0.441928  | 2.350881  |
| 23            | 1             | 0           | 4.875155                | -1.754118 | -0.769709 |
| 24            | 1             | 0           | 3.621432                | 1.061283  | 3.195151  |
| 25            | 1             | 0           | 5.893509                | 1.189986  | 2.184799  |
| 26            | 8             | 0           | 6.788192                | -0.069718 | 0.235641  |
| 27            | 6             | 0           | 7.184935                | -0.764032 | -0.932744 |
| 28            | 1             | 0           | 7.168645                | -1.845195 | -0.770615 |
| 29            | 1             | 0           | 6.535274                | -0.511729 | -1.774992 |
| 30            | 1             | 0           | 8.201484                | -0.443308 | -1.143009 |
| 31            | 6             | 0           | -2.947023               | 0.070024  | -0.424125 |
| 32            | 6             | 0           | -4.085594               | -0.769461 | -0.041706 |
| 33            | 6             | 0           | -1.895773               | -0.556458 | -1.100567 |
| 34            | 6             | 0           | -1.895883               | -1.981711 | -1.238989 |
| 35            | 6             | 0           | -4.067758               | -2.129533 | -0.348597 |
| 36            | 8             | 0           | -3.020631               | -2.694009 | -1.031709 |
| 37            | 8             | 0           | -2.989110               | 1.309932  | -0.124652 |
| 38            | 6             | 0           | -0.677270               | 0.164478  | -1.399783 |
| 39            | 6             | 0           | 0.323050                | -0.227148 | -2.203283 |
| 40            | 1             | 0           | -1.339666               | -2.418769 | -2.057501 |
| 41            | 1             | 0           | -0.497410               | 1.067439  | -0.831060 |
| 42            | 6             | 0           | 1.639335                | 0.440097  | -2.188358 |
| 43            | 8             | 0           | 2.629644                | -0.032213 | -2.708873 |
| 44            | 1             | 0           | 0.270615                | -1.099866 | -2.841459 |
| 45            | 8             | 0           | 1.636423                | 1.580653  | -1.491408 |
| 46            | 6             | 0           | 2.919654                | 2.188251  | -1.288853 |
| 47            | 1             | 0           | 3.589159                | 1.483287  | -0.798345 |
| 48            | 1             | 0           | 3.342812                | 2.491659  | -2.244658 |
| 49            | 1             | 0           | 2.729817                | 3.048280  | -0.654976 |

Imaginary frequency: -230.4263 cm<sup>-1</sup>  
 Electronic energy  $E = -4189.695916$  a.u.  
 Enthalpy  $H = -4189.660997$  a.u.  
 Entropy  $S = 208.601$  cal/mol/K  
 Gibbs free energy  $G = -4189.764464$  a.u.  
 Total free energy in solution  $E_{\text{sol}} = -4190.87618$  a.u.

|    |    |   |           |           |           |
|----|----|---|-----------|-----------|-----------|
| 50 | 6  | 0 | -5.192822 | -0.248473 | 0.637910  |
| 51 | 6  | 0 | -6.245741 | -1.074232 | 0.991825  |
| 52 | 6  | 0 | -6.204453 | -2.435668 | 0.671794  |
| 53 | 6  | 0 | -5.116225 | -2.972647 | 0.000883  |
| 54 | 1  | 0 | -5.195860 | 0.808065  | 0.867707  |
| 55 | 1  | 0 | -7.101021 | -0.667482 | 1.514198  |
| 56 | 1  | 0 | -7.028009 | -3.080585 | 0.949141  |
| 57 | 1  | 0 | -5.059300 | -4.020407 | -0.260266 |
| 58 | 30 | 0 | -1.733387 | 2.723716  | 0.185916  |
| 59 | 17 | 0 | -2.074039 | 4.595754  | -0.840967 |
| 60 | 17 | 0 | -0.200096 | 2.234920  | 1.718751  |

**trans-exo-IM1-IV**

Standard orientation:

| Center Number | Atomic Number | Atomic Type | Coordinates (Angstroms) |           |           |
|---------------|---------------|-------------|-------------------------|-----------|-----------|
|               |               |             | X                       | Y         | Z         |
| 1             | 6             | 0           | -2.031779               | -1.507278 | -0.286604 |
| 2             | 7             | 0           | -0.283267               | -1.522219 | 1.273597  |
| 3             | 6             | 0           | -0.645799               | -1.659011 | 0.016489  |
| 4             | 6             | 0           | 0.312395                | -1.934136 | -1.088978 |
| 5             | 6             | 0           | -2.959104               | -0.985336 | 0.601480  |
| 6             | 6             | 0           | -1.328360               | -1.532920 | 2.323416  |
| 7             | 6             | 0           | -2.533125               | -0.654808 | 1.992519  |
| 8             | 1             | 0           | 0.640159                | -0.988699 | -1.537957 |
| 9             | 1             | 0           | -0.194621               | -2.517575 | -1.857927 |
| 10            | 1             | 0           | 1.177022                | -2.497946 | -0.758189 |
| 11            | 6             | 0           | -4.161131               | -0.784556 | -0.115681 |
| 12            | 6             | 0           | -3.911157               | -1.213293 | -1.442501 |
| 13            | 7             | 0           | -2.620035               | -1.651168 | -1.528010 |
| 14            | 1             | 0           | -2.149264               | -1.888972 | -2.383296 |
| 15            | 1             | 0           | -0.862950               | -1.226215 | 3.256695  |
| 16            | 1             | 0           | -1.657820               | -2.570759 | 2.426402  |
| 17            | 1             | 0           | -2.300879               | 0.412165  | 2.071473  |
| 18            | 1             | 0           | -3.317457               | -0.873815 | 2.719286  |
| 19            | 6             | 0           | -5.428875               | -0.274841 | 0.248872  |
| 20            | 6             | 0           | -6.397986               | -0.213068 | -0.727040 |
| 21            | 6             | 0           | -6.132102               | -0.652699 | -2.055614 |
| 22            | 6             | 0           | -4.910900               | -1.151483 | -2.428910 |
| 23            | 1             | 0           | -5.607933               | 0.056775  | 1.261111  |
| 24            | 1             | 0           | -4.726573               | -1.474758 | -3.444702 |
| 25            | 1             | 0           | -6.941359               | -0.572761 | -2.768904 |
| 26            | 8             | 0           | -7.658493               | 0.253073  | -0.543324 |
| 27            | 6             | 0           | -7.980885               | 0.748598  | 0.743930  |
| 28            | 1             | 0           | -7.902421               | -0.040069 | 1.496846  |
| 29            | 1             | 0           | -7.326973               | 1.581137  | 1.015216  |
| 30            | 1             | 0           | -9.008674               | 1.094441  | 0.683847  |
| 31            | 6             | 0           | 2.974462                | -0.624712 | 0.176067  |
| 32            | 6             | 0           | 3.485259                | -2.003800 | 0.171614  |
| 33            | 6             | 0           | 1.898145                | -0.342707 | 1.000329  |
| 34            | 6             | 0           | 1.169314                | -1.421295 | 1.723445  |
| 35            | 6             | 0           | 2.848019                | -2.977572 | 0.941214  |
| 36            | 8             | 0           | 1.722249                | -2.713293 | 1.679838  |
| 37            | 8             | 0           | 3.585810                | 0.236540  | -0.558098 |
| 38            | 6             | 0           | 1.481017                | 1.007301  | 1.223974  |
| 39            | 6             | 0           | 0.440158                | 1.431547  | 1.969654  |
| 40            | 1             | 0           | 1.061489                | -1.159398 | 2.777728  |
| 41            | 1             | 0           | 2.105932                | 1.791899  | 0.808195  |
| 42            | 6             | 0           | 0.072707                | 2.845409  | 2.102164  |

Imaginary frequency: none  
 Electronic energy  $E = -4189.705774$  a.u.  
 Enthalpy  $H = -4189.670623$  a.u.  
 Entropy  $S = 221.782$  cal/mol/K  
 Gibbs free energy  $G = -4189.775999$  a.u.  
 Total free energy in solution  $E_{\text{sol}} = -4190.89565$  a.u.

|    |    |   |           |           |           |
|----|----|---|-----------|-----------|-----------|
| 43 | 8  | 0 | -0.922686 | 3.227461  | 2.685195  |
| 44 | 1  | 0 | -0.226913 | 0.765847  | 2.493510  |
| 45 | 8  | 0 | 0.934791  | 3.664078  | 1.484102  |
| 46 | 6  | 0 | 0.604034  | 5.055172  | 1.511433  |
| 47 | 1  | 0 | -0.372186 | 5.215870  | 1.057551  |
| 48 | 1  | 0 | 0.586452  | 5.415128  | 2.538994  |
| 49 | 1  | 0 | 1.384723  | 5.543516  | 0.937277  |
| 50 | 6  | 0 | 4.610150  | -2.363086 | -0.575149 |
| 51 | 6  | 0 | 5.091312  | -3.663180 | -0.543684 |
| 52 | 6  | 0 | 4.442006  | -4.620930 | 0.237021  |
| 53 | 6  | 0 | 3.316897  | -4.285581 | 0.979652  |
| 54 | 1  | 0 | 5.088495  | -1.592408 | -1.163784 |
| 55 | 1  | 0 | 5.966194  | -3.932791 | -1.119730 |
| 56 | 1  | 0 | 4.813337  | -5.637228 | 0.268148  |
| 57 | 1  | 0 | 2.796919  | -5.011031 | 1.590424  |
| 58 | 30 | 0 | 2.738847  | 1.775270  | -1.332602 |
| 59 | 17 | 0 | 3.617396  | 3.741773  | -1.037212 |
| 60 | 17 | 0 | 0.964463  | 1.222343  | -2.538412 |

-----

**trans-exo-TS2-IV**

Standard orientation:

-----

| Center<br>Number | Atomic<br>Number | Atomic<br>Type | Coordinates (Angstroms) |   |   |
|------------------|------------------|----------------|-------------------------|---|---|
|                  |                  |                | X                       | Y | Z |

-----

|    |   |   |            |           |           |
|----|---|---|------------|-----------|-----------|
| 1  | 6 | 0 | -2.224705  | 0.279049  | -0.006487 |
| 2  | 7 | 0 | -0.445873  | 1.718438  | -0.654473 |
| 3  | 6 | 0 | -0.792642  | 0.558941  | -0.020786 |
| 4  | 6 | 0 | -0.037907  | 0.141170  | 1.214766  |
| 5  | 6 | 0 | -3.177805  | 1.241573  | -0.233217 |
| 6  | 6 | 0 | -1.468537  | 2.402676  | -1.470201 |
| 7  | 6 | 0 | -2.763669  | 2.595268  | -0.697862 |
| 8  | 1 | 0 | 1.024473   | 0.350570  | 1.167344  |
| 9  | 1 | 0 | -0.182307  | -0.915782 | 1.429216  |
| 10 | 1 | 0 | -0.458238  | 0.723171  | 2.039664  |
| 11 | 6 | 0 | -4.443643  | 0.661925  | 0.091135  |
| 12 | 6 | 0 | -4.175434  | -0.668681 | 0.491115  |
| 13 | 7 | 0 | -2.808558  | -0.872568 | 0.486359  |
| 14 | 1 | 0 | -2.408988  | -1.783797 | 0.303527  |
| 15 | 1 | 0 | -1.677128  | 1.816660  | -2.375738 |
| 16 | 1 | 0 | -1.031483  | 3.357147  | -1.761249 |
| 17 | 1 | 0 | -3.511742  | 3.036276  | -1.359295 |
| 18 | 1 | 0 | -2.611843  | 3.283514  | 0.139364  |
| 19 | 6 | 0 | -5.760015  | 1.136321  | 0.059854  |
| 20 | 6 | 0 | -6.784255  | 0.267373  | 0.397618  |
| 21 | 6 | 0 | -6.508878  | -1.067836 | 0.767448  |
| 22 | 6 | 0 | -5.209191  | -1.544435 | 0.816668  |
| 23 | 1 | 0 | -6.003867  | 2.150760  | -0.226583 |
| 24 | 1 | 0 | -5.009467  | -2.567575 | 1.106883  |
| 25 | 1 | 0 | -7.316197  | -1.738136 | 1.022853  |
| 26 | 8 | 0 | -8.045782  | 0.784732  | 0.344666  |
| 27 | 6 | 0 | -9.125904  | -0.072468 | 0.659138  |
| 28 | 1 | 0 | -9.170943  | -0.922815 | -0.026527 |
| 29 | 1 | 0 | -9.058093  | -0.436275 | 1.687842  |
| 30 | 1 | 0 | -10.024965 | 0.528044  | 0.548229  |
| 31 | 6 | 0 | 3.095201   | 0.947717  | -0.485767 |
| 32 | 6 | 0 | 3.394747   | 2.299117  | -0.022747 |
| 33 | 6 | 0 | 1.832300   | 0.746808  | -1.117385 |
| 34 | 6 | 0 | 0.888718   | 1.876029  | -1.326634 |
| 35 | 6 | 0 | 2.501388   | 3.339043  | -0.298918 |
| 36 | 8 | 0 | 1.384150   | 3.168473  | -1.056473 |

Imaginary frequency: -283.0278 cm<sup>-1</sup>

Electronic energy  $E = -4189.687524$  a.u.

Enthalpy  $H = -4189.653351$  a.u.

Entropy  $S = 215.898$  cal/mol/K

Gibbs free energy  $G = -4189.755930$  a.u.

Total free energy in solution  $E_{\text{sol}} = -4190.86742$  a.u.

|    |    |   |           |           |           |
|----|----|---|-----------|-----------|-----------|
| 37 | 8  | 0 | 3.926751  | 0.022774  | -0.271144 |
| 38 | 6  | 0 | 1.351970  | -0.535171 | -1.280242 |
| 39 | 6  | 0 | 0.018950  | -0.899266 | -1.503279 |
| 40 | 1  | 0 | 0.619868  | 1.901167  | -2.386435 |
| 41 | 1  | 0 | 2.024874  | -1.346886 | -1.042843 |
| 42 | 6  | 0 | -0.372059 | -2.287627 | -1.206799 |
| 43 | 8  | 0 | -1.498949 | -2.732527 | -1.340726 |
| 44 | 1  | 0 | -0.644623 | -0.371814 | -2.174792 |
| 45 | 8  | 0 | 0.630282  | -2.997638 | -0.671621 |
| 46 | 6  | 0 | 0.340623  | -4.360625 | -0.331568 |
| 47 | 1  | 0 | -0.379077 | -4.393803 | 0.484922  |
| 48 | 1  | 0 | -0.063979 | -4.880492 | -1.197017 |
| 49 | 1  | 0 | 1.292940  | -4.783337 | -0.029343 |
| 50 | 6  | 0 | 4.545992  | 2.563564  | 0.730657  |
| 51 | 6  | 0 | 4.805264  | 3.842347  | 1.187538  |
| 52 | 6  | 0 | 3.906276  | 4.872551  | 0.892237  |
| 53 | 6  | 0 | 2.758206  | 4.630332  | 0.153068  |
| 54 | 1  | 0 | 5.214467  | 1.739954  | 0.940203  |
| 55 | 1  | 0 | 5.693645  | 4.044710  | 1.769694  |
| 56 | 1  | 0 | 4.102762  | 5.876183  | 1.247215  |
| 57 | 1  | 0 | 2.053439  | 5.415441  | -0.083220 |
| 58 | 30 | 0 | 3.669890  | -1.783008 | 0.421914  |
| 59 | 17 | 0 | 4.174469  | -3.439680 | -0.879140 |
| 60 | 17 | 0 | 2.853134  | -1.635286 | 2.438065  |

**trans-exo-IM2-IV**

Standard orientation:

| Center Number | Atomic Number | Atomic Type | Coordinates (Angstroms) |           |           |
|---------------|---------------|-------------|-------------------------|-----------|-----------|
|               |               |             | X                       | Y         | Z         |
| 1             | 6             | 0           | -2.897096               | -0.004669 | 0.132657  |
| 2             | 7             | 0           | -0.982231               | 1.325341  | -0.344329 |
| 3             | 6             | 0           | -1.392163               | 0.042299  | 0.263899  |
| 4             | 6             | 0           | -0.966791               | -0.077189 | 1.740223  |
| 5             | 6             | 0           | -3.708681               | 1.026111  | -0.257758 |
| 6             | 6             | 0           | -1.793274               | 2.496779  | 0.012023  |
| 7             | 6             | 0           | -3.184119               | 2.382283  | -0.595563 |
| 8             | 1             | 0           | 0.115965                | -0.168952 | 1.832076  |
| 9             | 1             | 0           | -1.441535               | -0.945111 | 2.202232  |
| 10            | 1             | 0           | -1.290889               | 0.807225  | 2.287126  |
| 11            | 6             | 0           | -5.054812               | 0.528572  | -0.236248 |
| 12            | 6             | 0           | -4.978380               | -0.819681 | 0.183799  |
| 13            | 7             | 0           | -3.653558               | -1.117075 | 0.423129  |
| 14            | 1             | 0           | -3.269146               | -2.041113 | 0.557404  |
| 15            | 1             | 0           | -1.270225               | 3.376181  | -0.366598 |
| 16            | 1             | 0           | -1.870084               | 2.606423  | 1.099274  |
| 17            | 1             | 0           | -3.130807               | 2.529311  | -1.678446 |
| 18            | 1             | 0           | -3.827781               | 3.166350  | -0.188137 |
| 19            | 6             | 0           | -6.298618               | 1.095062  | -0.529574 |
| 20            | 6             | 0           | -7.435100               | 0.309333  | -0.408676 |
| 21            | 6             | 0           | -7.346875               | -1.035628 | 0.003404  |
| 22            | 6             | 0           | -6.119221               | -1.608088 | 0.303945  |
| 23            | 1             | 0           | -6.404251               | 2.122699  | -0.852086 |
| 24            | 1             | 0           | -6.059601               | -2.640688 | 0.623765  |
| 25            | 1             | 0           | -8.237717               | -1.639773 | 0.092822  |
| 26            | 8             | 0           | -8.618507               | 0.925148  | -0.715457 |
| 27            | 6             | 0           | -9.802648               | 0.165262  | -0.597829 |
| 28            | 1             | 0           | -9.792198               | -0.696618 | -1.271082 |
| 29            | 1             | 0           | -9.955055               | -0.179702 | 0.428855  |
| 30            | 1             | 0           | -10.615336              | 0.830691  | -0.878423 |

Imaginary frequency: none  
 Electronic energy  $E = -4189.724077$  a.u.  
 Enthalpy  $H = -4189.690179$  a.u.  
 Entropy  $S = 214.004$  cal/mol/K  
 Gibbs free energy  $G = -4189.791860$  a.u.  
 Total free energy in solution  $E_{\text{sol}} = -4190.91087$  a.u.



|    |    |   |           |           |           |
|----|----|---|-----------|-----------|-----------|
| 31 | 6  | 0 | 2.635316  | 0.619135  | -0.911582 |
| 32 | 6  | 0 | 3.138531  | 1.730784  | -0.121524 |
| 33 | 6  | 0 | 1.191748  | 0.421750  | -0.856242 |
| 34 | 6  | 0 | 0.387874  | 1.604035  | -0.435351 |
| 35 | 6  | 0 | 2.270181  | 2.381394  | 0.780233  |
| 36 | 8  | 0 | 0.947575  | 2.131085  | 0.825245  |
| 37 | 8  | 0 | 3.385628  | -0.182456 | -1.508659 |
| 38 | 6  | 0 | 0.662783  | -0.793880 | -0.996981 |
| 39 | 6  | 0 | -0.742857 | -1.113538 | -0.584539 |
| 40 | 1  | 0 | 0.534556  | 2.419174  | -1.153228 |
| 41 | 1  | 0 | 1.299818  | -1.603115 | -1.329544 |
| 42 | 6  | 0 | -0.715162 | -2.417604 | 0.219422  |
| 43 | 8  | 0 | -1.677003 | -3.119979 | 0.445261  |
| 44 | 1  | 0 | -1.369329 | -1.288820 | -1.464147 |
| 45 | 8  | 0 | 0.500387  | -2.681241 | 0.677974  |
| 46 | 6  | 0 | 0.635941  | -3.847515 | 1.510549  |
| 47 | 1  | 0 | 0.020435  | -3.730217 | 2.400408  |
| 48 | 1  | 0 | 0.320118  | -4.730650 | 0.960035  |
| 49 | 1  | 0 | 1.690429  | -3.888025 | 1.760257  |
| 50 | 6  | 0 | 4.510822  | 2.047818  | -0.123318 |
| 51 | 6  | 0 | 5.013548  | 2.974436  | 0.763837  |
| 52 | 6  | 0 | 4.145125  | 3.589953  | 1.679023  |
| 53 | 6  | 0 | 2.791415  | 3.307023  | 1.689800  |
| 54 | 1  | 0 | 5.163149  | 1.572580  | -0.847660 |
| 55 | 1  | 0 | 6.066101  | 3.220797  | 0.756664  |
| 56 | 1  | 0 | 4.538040  | 4.309347  | 2.386141  |
| 57 | 1  | 0 | 2.113485  | 3.783590  | 2.384321  |
| 58 | 30 | 0 | 4.933567  | -1.001082 | -0.587310 |
| 59 | 17 | 0 | 4.025102  | -2.014661 | 1.108756  |
| 60 | 17 | 0 | 6.864652  | -0.645506 | -1.475523 |

**trans-COM-V**

Standard orientation:

| Center Number | Atomic Number | Atomic Type | Coordinates (Angstroms) |           |           |
|---------------|---------------|-------------|-------------------------|-----------|-----------|
|               |               |             | X                       | Y         | Z         |
| 1             | 6             | 0           | -1.523841               | -1.298561 | -0.189402 |
| 2             | 6             | 0           | -2.927693               | -0.851459 | -0.139630 |
| 3             | 6             | 0           | -0.604458               | -0.328394 | -0.821642 |
| 4             | 6             | 0           | -1.100781               | 0.819392  | -1.361310 |
| 5             | 6             | 0           | -3.298704               | 0.363279  | -0.709165 |
| 6             | 8             | 0           | -2.376587               | 1.175623  | -1.333506 |
| 7             | 8             | 0           | -1.148029               | -2.371703 | 0.245085  |
| 8             | 6             | 0           | 0.806821                | -0.687802 | -0.847175 |
| 9             | 6             | 0           | 1.847988                | 0.063126  | -1.291575 |
| 10            | 1             | 0           | -0.498266               | 1.563327  | -1.863285 |
| 11            | 1             | 0           | 1.016379                | -1.661261 | -0.412785 |
| 12            | 6             | 0           | 3.244078                | -0.456933 | -1.314744 |
| 13            | 8             | 0           | 4.124456                | 0.070601  | -1.948866 |
| 14            | 1             | 0           | 1.727268                | 1.013517  | -1.797898 |
| 15            | 8             | 0           | 3.398340                | -1.544681 | -0.556562 |
| 16            | 6             | 0           | 4.730648                | -2.083302 | -0.536270 |
| 17            | 1             | 0           | 5.018612                | -2.394473 | -1.538271 |
| 18            | 1             | 0           | 5.426793                | -1.329608 | -0.175186 |
| 19            | 1             | 0           | 4.687581                | -2.929559 | 0.140454  |
| 20            | 6             | 0           | -3.910915               | -1.634724 | 0.474008  |
| 21            | 6             | 0           | -5.222726               | -1.197603 | 0.510778  |
| 22            | 6             | 0           | -5.568904               | 0.029044  | -0.069900 |
| 23            | 6             | 0           | -4.611770               | 0.819456  | -0.685501 |

Imaginary frequency: none  
 Electronic energy  $E = -3501.466869$  a.u.  
 Enthalpy  $H = -3501.446589$  a.u.  
 Entropy  $S = 151.290$  cal/mol/K  
 Gibbs free energy  $G = -3501.518472$  a.u.  
 Total free energy in solution  $E_{\text{sol}} = -3502.20922$  a.u.

|    |    |   |           |           |           |
|----|----|---|-----------|-----------|-----------|
| 24 | 1  | 0 | -3.603867 | -2.575044 | 0.912241  |
| 25 | 1  | 0 | -5.982755 | -1.800619 | 0.988799  |
| 26 | 1  | 0 | -6.595716 | 0.368966  | -0.038317 |
| 27 | 1  | 0 | -4.851987 | 1.770646  | -1.139795 |
| 28 | 30 | 0 | 1.311826  | 0.859739  | 0.867644  |
| 29 | 17 | 0 | 0.912842  | 2.925925  | 0.358003  |
| 30 | 17 | 0 | 1.508174  | -0.442977 | 2.555801  |

**trans-endo-TS1-V**

Standard orientation:

Imaginary frequency: -189.5696 cm<sup>-1</sup>

Electronic energy  $E = -4189.680096$  a.u.

Enthalpy  $H = -4189.644993$  a.u.

Center Atomic Atomic Coordinates (Angstroms)  
Number Number Type X Y Z

Entropy  $S = 219.622$  cal/mol/K

Gibbs free energy  $G = -4189.749342$  a.u.

Total free energy in solution  $E_{\text{sol}} = -4190.87613$  a.u.

|    |   |   |           |           |           |
|----|---|---|-----------|-----------|-----------|
| 1  | 6 | 0 | -1.921799 | 0.516984  | -1.859416 |
| 2  | 7 | 0 | 0.376870  | 1.107243  | -1.954840 |
| 3  | 6 | 0 | -0.576321 | 0.331356  | -2.362919 |
| 4  | 6 | 0 | -0.326866 | -0.754540 | -3.371389 |
| 5  | 6 | 0 | -2.197638 | 1.300941  | -0.762006 |
| 6  | 6 | 0 | 0.001732  | 2.303401  | -1.181448 |
| 7  | 6 | 0 | -1.114432 | 2.123502  | -0.142561 |
| 8  | 1 | 0 | -0.756784 | -1.704215 | -3.048522 |
| 9  | 1 | 0 | 0.733671  | -0.876926 | -3.580706 |
| 10 | 1 | 0 | -0.812913 | -0.461277 | -4.306992 |
| 11 | 6 | 0 | -3.544692 | 1.026588  | -0.387616 |
| 12 | 6 | 0 | -4.033241 | 0.075425  | -1.313975 |
| 13 | 7 | 0 | -3.040730 | -0.202972 | -2.222156 |
| 14 | 1 | 0 | -3.023743 | -1.033567 | -2.790218 |
| 15 | 1 | 0 | -0.330105 | 3.035897  | -1.923714 |
| 16 | 1 | 0 | 0.903817  | 2.699790  | -0.718475 |
| 17 | 1 | 0 | -1.474205 | 3.115748  | 0.139314  |
| 18 | 1 | 0 | -0.744851 | 1.653015  | 0.774066  |
| 19 | 6 | 0 | -4.367585 | 1.488200  | 0.661133  |
| 20 | 6 | 0 | -5.645763 | 0.974274  | 0.754109  |
| 21 | 6 | 0 | -6.121092 | 0.018377  | -0.180927 |
| 22 | 6 | 0 | -5.336508 | -0.433429 | -1.216862 |
| 23 | 8 | 0 | -6.550051 | 1.314428  | 1.712705  |
| 24 | 6 | 0 | -6.137293 | 2.263350  | 2.677412  |
| 25 | 1 | 0 | -3.988188 | 2.215699  | 1.364004  |
| 26 | 1 | 0 | -7.132631 | -0.341455 | -0.049418 |
| 27 | 1 | 0 | -5.712005 | -1.163333 | -1.922144 |
| 28 | 1 | 0 | -5.885201 | 3.217203  | 2.206339  |
| 29 | 1 | 0 | -6.982190 | 2.399525  | 3.346866  |
| 30 | 1 | 0 | -5.276105 | 1.898390  | 3.243524  |
| 31 | 6 | 0 | 2.052207  | 1.091554  | 1.094165  |
| 32 | 6 | 0 | 3.152139  | 1.967257  | 0.632649  |
| 33 | 6 | 0 | 1.682978  | 0.037598  | 0.142001  |
| 34 | 6 | 0 | 2.043313  | 0.202514  | -1.222015 |
| 35 | 6 | 0 | 3.603140  | 1.883567  | -0.681733 |
| 36 | 8 | 0 | 3.054230  | 0.994826  | -1.584169 |
| 37 | 8 | 0 | 1.505815  | 1.241757  | 2.176072  |
| 38 | 6 | 0 | 0.524199  | -0.775836 | 0.486448  |
| 39 | 6 | 0 | -0.004143 | -1.750536 | -0.286776 |
| 40 | 1 | 0 | 1.925346  | -0.603979 | -1.924543 |
| 41 | 1 | 0 | 0.059212  | -0.528798 | 1.435318  |
| 42 | 6 | 0 | -1.357446 | -2.293249 | -0.060715 |
| 43 | 8 | 0 | -2.003197 | -2.807232 | -0.953100 |
| 44 | 1 | 0 | 0.453208  | -2.079544 | -1.209815 |

|    |    |   |           |           |           |
|----|----|---|-----------|-----------|-----------|
| 45 | 8  | 0 | -1.816972 | -2.097806 | 1.175244  |
| 46 | 6  | 0 | -3.180171 | -2.495872 | 1.389082  |
| 47 | 1  | 0 | -3.843977 | -1.895210 | 0.769190  |
| 48 | 1  | 0 | -3.301741 | -3.549007 | 1.145099  |
| 49 | 1  | 0 | -3.369290 | -2.317241 | 2.442358  |
| 50 | 6  | 0 | 3.741998  | 2.897377  | 1.491503  |
| 51 | 6  | 0 | 4.769973  | 3.708415  | 1.039276  |
| 52 | 6  | 0 | 5.210102  | 3.601036  | -0.283736 |
| 53 | 6  | 0 | 4.628592  | 2.691504  | -1.155723 |
| 54 | 1  | 0 | 3.372200  | 2.947500  | 2.507097  |
| 55 | 1  | 0 | 5.234299  | 4.421107  | 1.707427  |
| 56 | 1  | 0 | 6.013919  | 4.233356  | -0.637464 |
| 57 | 1  | 0 | 4.949638  | 2.591397  | -2.183259 |
| 58 | 30 | 0 | 2.574427  | -1.948174 | 0.691855  |
| 59 | 17 | 0 | 3.200917  | -2.934496 | -1.157194 |
| 60 | 17 | 0 | 2.893902  | -2.178744 | 2.809913  |

**trans-endo-IM1-V**

Standard orientation:

| Center Number | Atomic Number | Atomic Type | Coordinates (Angstroms) |           |           |
|---------------|---------------|-------------|-------------------------|-----------|-----------|
|               |               |             | X                       | Y         | Z         |
| 1             | 6             | 0           | 2.041301                | -0.037929 | 1.711683  |
| 2             | 7             | 0           | -0.254870               | 0.451152  | 1.698185  |
| 3             | 6             | 0           | 0.695753                | -0.404024 | 2.025115  |
| 4             | 6             | 0           | 0.458999                | -1.688518 | 2.763880  |
| 5             | 6             | 0           | 2.357117                | 0.968059  | 0.812039  |
| 6             | 6             | 0           | 0.137602                | 1.826709  | 1.320359  |
| 7             | 6             | 0           | 1.284085                | 1.877858  | 0.312020  |
| 8             | 1             | 0           | 0.989119                | -2.505691 | 2.273012  |
| 9             | 1             | 0           | -0.588450               | -1.954044 | 2.870016  |
| 10            | 1             | 0           | 0.875244                | -1.551257 | 3.767233  |
| 11            | 6             | 0           | 3.727216                | 0.811446  | 0.483255  |
| 12            | 6             | 0           | 4.192244                | -0.303007 | 1.222776  |
| 13            | 7             | 0           | 3.166341                | -0.789659 | 1.988295  |
| 14            | 1             | 0           | 3.145351                | -1.728567 | 2.350917  |
| 15            | 1             | 0           | 0.455900                | 2.310311  | 2.246411  |
| 16            | 1             | 0           | -0.747426               | 2.337727  | 0.956080  |
| 17            | 1             | 0           | 1.628552                | 2.912119  | 0.249483  |
| 18            | 1             | 0           | 0.957682                | 1.585459  | -0.691873 |
| 19            | 6             | 0           | 4.593684                | 1.505484  | -0.391495 |
| 20            | 6             | 0           | 5.889690                | 1.049811  | -0.505351 |
| 21            | 6             | 0           | 6.340075                | -0.076080 | 0.239397  |
| 22            | 6             | 0           | 5.516839                | -0.754825 | 1.103213  |
| 23            | 8             | 0           | 6.839013                | 1.598755  | -1.305004 |
| 24            | 6             | 0           | 6.454833                | 2.713115  | -2.090623 |
| 25            | 1             | 0           | 4.231483                | 2.356938  | -0.949218 |
| 26            | 1             | 0           | 7.369064                | -0.378285 | 0.098028  |
| 27            | 1             | 0           | 5.875018                | -1.610024 | 1.660769  |
| 28            | 1             | 0           | 6.139729                | 3.546796  | -1.457837 |
| 29            | 1             | 0           | 7.335560                | 2.998514  | -2.658337 |
| 30            | 1             | 0           | 5.645365                | 2.447060  | -2.775312 |
| 31            | 6             | 0           | -1.901742               | 1.147841  | -0.982187 |
| 32            | 6             | 0           | -2.910099               | 1.986313  | -0.287327 |
| 33            | 6             | 0           | -1.573058               | -0.105315 | -0.287312 |
| 34            | 6             | 0           | -1.596657               | -0.042761 | 1.228610  |
| 35            | 6             | 0           | -3.228211               | 1.730129  | 1.046360  |
| 36            | 8             | 0           | -2.607074               | 0.752209  | 1.786779  |
| 37            | 8             | 0           | -1.430389               | 1.470618  | -2.064326 |
| 38            | 6             | 0           | -0.452733               | -0.840489 | -0.857416 |

Imaginary frequency: none  
 Electronic energy  $E = -4189.690802$  a.u.  
 Enthalpy  $H = -4189.656023$  a.u.  
 Entropy  $S = 216.077$  cal/mol/K  
 Gibbs free energy  $G = -4189.758688$  a.u.  
 Total free energy in solution  $E_{\text{sol}} = -4190.88710$  a.u.

|    |    |   |           |           |           |
|----|----|---|-----------|-----------|-----------|
| 39 | 6  | 0 | 0.112611  | -1.938558 | -0.311304 |
| 40 | 1  | 0 | -1.722326 | -1.025747 | 1.661761  |
| 41 | 1  | 0 | -0.013659 | -0.397967 | -1.746592 |
| 42 | 6  | 0 | 1.470731  | -2.384596 | -0.639934 |
| 43 | 8  | 0 | 2.143917  | -3.059139 | 0.122015  |
| 44 | 1  | 0 | -0.356061 | -2.479678 | 0.498675  |
| 45 | 8  | 0 | 1.941975  | -1.910472 | -1.800496 |
| 46 | 6  | 0 | 3.314877  | -2.220147 | -2.070006 |
| 47 | 1  | 0 | 3.958266  | -1.760693 | -1.319882 |
| 48 | 1  | 0 | 3.465228  | -3.297694 | -2.064634 |
| 49 | 1  | 0 | 3.516789  | -1.807070 | -3.053271 |
| 50 | 6  | 0 | -3.570518 | 3.014371  | -0.962724 |
| 51 | 6  | 0 | -4.539363 | 3.766498  | -0.318463 |
| 52 | 6  | 0 | -4.849405 | 3.491291  | 1.015552  |
| 53 | 6  | 0 | -4.197345 | 2.478252  | 1.705914  |
| 54 | 1  | 0 | -3.307226 | 3.180069  | -1.999014 |
| 55 | 1  | 0 | -5.060133 | 4.553749  | -0.846458 |
| 56 | 1  | 0 | -5.609747 | 4.070677  | 1.523513  |
| 57 | 1  | 0 | -4.422863 | 2.250761  | 2.738827  |
| 58 | 30 | 0 | -3.198351 | -1.377984 | -0.707004 |
| 59 | 17 | 0 | -3.201253 | -2.966702 | 0.835081  |
| 60 | 17 | 0 | -4.557624 | -0.950105 | -2.338343 |

**trans-endo-TS2-V**

Standard orientation:

Imaginary frequency: -470.2858 cm<sup>-1</sup>

Electronic energy  $E = -4189.681718$  a.u.

Enthalpy  $H = -4189.647848$  a.u.

Center Atomic Atomic Coordinates (Angstroms)  
Number Number Type X Y Z

Entropy  $S = 210.758$  cal/mol/K

Gibbs free energy  $G = -4189.747986$  a.u.

Total free energy in solution  $E_{\text{sol}} = -4190.87591$  a.u.

|    |   |   |           |           |           |
|----|---|---|-----------|-----------|-----------|
| 1  | 6 | 0 | -1.921770 | -0.100464 | -1.404308 |
| 2  | 7 | 0 | 0.310097  | 0.674885  | -1.722847 |
| 3  | 6 | 0 | -0.553946 | -0.393356 | -1.819929 |
| 4  | 6 | 0 | -0.371722 | -1.329999 | -2.997368 |
| 5  | 6 | 0 | -2.275223 | 0.927018  | -0.564430 |
| 6  | 6 | 0 | -0.191257 | 1.980879  | -1.237745 |
| 7  | 6 | 0 | -1.237853 | 1.908542  | -0.122578 |
| 8  | 1 | 0 | -0.840511 | -2.294045 | -2.802840 |
| 9  | 1 | 0 | 0.680325  | -1.498341 | -3.222864 |
| 10 | 1 | 0 | -0.835813 | -0.863113 | -3.869324 |
| 11 | 6 | 0 | -3.665400 | 0.773702  | -0.283991 |
| 12 | 6 | 0 | -4.092133 | -0.376672 | -0.986594 |
| 13 | 7 | 0 | -3.018750 | -0.885881 | -1.680861 |
| 14 | 1 | 0 | -2.975199 | -1.813266 | -2.070296 |
| 15 | 1 | 0 | -0.645055 | 2.469491  | -2.102169 |
| 16 | 1 | 0 | 0.669559  | 2.575379  | -0.941906 |
| 17 | 1 | 0 | -1.661577 | 2.906494  | 0.010640  |
| 18 | 1 | 0 | -0.791554 | 1.618077  | 0.834422  |
| 19 | 6 | 0 | -4.581032 | 1.505123  | 0.499893  |
| 20 | 6 | 0 | -5.884867 | 1.052240  | 0.565454  |
| 21 | 6 | 0 | -6.294705 | -0.108239 | -0.137544 |
| 22 | 6 | 0 | -5.417612 | -0.826354 | -0.917724 |
| 23 | 8 | 0 | -6.875896 | 1.648035  | 1.284620  |
| 24 | 6 | 0 | -6.537684 | 2.819773  | 2.000621  |
| 25 | 1 | 0 | -4.253451 | 2.386100  | 1.033044  |
| 26 | 1 | 0 | -7.329904 | -0.406344 | -0.041654 |
| 27 | 1 | 0 | -5.744553 | -1.706227 | -1.457110 |
| 28 | 1 | 0 | -6.187259 | 3.604980  | 1.325132  |
| 29 | 1 | 0 | -7.449086 | 3.144647  | 2.494993  |
| 30 | 1 | 0 | -5.767984 | 2.614499  | 2.749524  |
| 31 | 6 | 0 | 2.045029  | 1.183510  | 1.063228  |
| 32 | 6 | 0 | 2.930194  | 2.191708  | 0.456332  |

|    |    |   |           |           |           |
|----|----|---|-----------|-----------|-----------|
| 33 | 6  | 0 | 1.651268  | 0.083682  | 0.143504  |
| 34 | 6  | 0 | 1.696687  | 0.313267  | -1.348635 |
| 35 | 6  | 0 | 3.180083  | 2.174636  | -0.919645 |
| 36 | 8  | 0 | 2.600982  | 1.293739  | -1.787588 |
| 37 | 8  | 0 | 1.671661  | 1.227242  | 2.221594  |
| 38 | 6  | 0 | 0.702444  | -0.830909 | 0.583415  |
| 39 | 6  | 0 | 0.091257  | -1.718810 | -0.331963 |
| 40 | 1  | 0 | 1.952572  | -0.590656 | -1.891053 |
| 41 | 1  | 0 | 0.332707  | -0.727215 | 1.599621  |
| 42 | 6  | 0 | -1.106412 | -2.494323 | 0.040155  |
| 43 | 8  | 0 | -1.601230 | -3.345681 | -0.673846 |
| 44 | 1  | 0 | 0.713348  | -2.220135 | -1.062563 |
| 45 | 8  | 0 | -1.645314 | -2.091423 | 1.193932  |
| 46 | 6  | 0 | -2.865933 | -2.750370 | 1.564312  |
| 47 | 1  | 0 | -3.644723 | -2.517042 | 0.840524  |
| 48 | 1  | 0 | -2.710433 | -3.826115 | 1.606358  |
| 49 | 1  | 0 | -3.122190 | -2.354267 | 2.541302  |
| 50 | 6  | 0 | 3.542131  | 3.163121  | 1.257243  |
| 51 | 6  | 0 | 4.398535  | 4.094210  | 0.699532  |
| 52 | 6  | 0 | 4.645835  | 4.058347  | -0.677205 |
| 53 | 6  | 0 | 4.042667  | 3.109883  | -1.488660 |
| 54 | 1  | 0 | 3.325518  | 3.144470  | 2.317332  |
| 55 | 1  | 0 | 4.877878  | 4.838749  | 1.320180  |
| 56 | 1  | 0 | 5.317972  | 4.780996  | -1.122151 |
| 57 | 1  | 0 | 4.219516  | 3.072098  | -2.554652 |
| 58 | 30 | 0 | 2.937562  | -1.681893 | 0.709612  |
| 59 | 17 | 0 | 3.496349  | -2.613683 | -1.181634 |
| 60 | 17 | 0 | 3.440738  | -1.899354 | 2.786410  |

**trans-endo-IM2-V**

Standard orientation:

| Center Number | Atomic Number | Atomic Type | Coordinates (Angstroms) |           |           |
|---------------|---------------|-------------|-------------------------|-----------|-----------|
|               |               |             | X                       | Y         | Z         |
| 1             | 6             | 0           | 1.813667                | 0.307090  | 1.544405  |
| 2             | 7             | 0           | -0.276487               | 1.349621  | 2.282060  |
| 3             | 6             | 0           | 0.595971                | 0.152975  | 2.420719  |
| 4             | 6             | 0           | 0.953233                | 0.002659  | 3.902360  |
| 5             | 6             | 0           | 1.967480                | 1.192320  | 0.511483  |
| 6             | 6             | 0           | 0.329212                | 2.536415  | 1.667187  |
| 7             | 6             | 0           | 0.986839                | 2.300033  | 0.302871  |
| 8             | 1             | 0           | 1.558266                | -0.881074 | 4.094501  |
| 9             | 1             | 0           | 0.032840                | -0.071362 | 4.484216  |
| 10            | 1             | 0           | 1.489985                | 0.896063  | 4.223207  |
| 11            | 6             | 0           | 3.236724                | 0.911341  | -0.095882 |
| 12            | 6             | 0           | 3.802128                | -0.159094 | 0.626831  |
| 13            | 7             | 0           | 2.920206                | -0.508723 | 1.627511  |
| 14            | 1             | 0           | 3.038256                | -1.264631 | 2.281277  |
| 15            | 1             | 0           | 1.102300                | 2.887448  | 2.354239  |
| 16            | 1             | 0           | -0.434894               | 3.309420  | 1.628947  |
| 17            | 1             | 0           | 1.497513                | 3.213768  | -0.014313 |
| 18            | 1             | 0           | 0.240460                | 2.069825  | -0.464480 |
| 19            | 6             | 0           | 3.937572                | 1.479677  | -1.175514 |
| 20            | 6             | 0           | 5.175808                | 0.951994  | -1.498094 |
| 21            | 6             | 0           | 5.728116                | -0.122038 | -0.763903 |
| 22            | 6             | 0           | 5.055979                | -0.685072 | 0.299305  |
| 23            | 8             | 0           | 5.961682                | 1.396918  | -2.521867 |
| 24            | 6             | 0           | 5.448865                | 2.446588  | -3.315563 |
| 25            | 1             | 0           | 3.503185                | 2.297432  | -1.732849 |

Imaginary frequency: none

Electronic energy  $E = -4189.711481$  a.u.

Enthalpy  $H = -4189.677784$  a.u.

Entropy  $S = 208.601$  cal/mol/K

Gibbs free energy  $G = -4189.779490$  a.u.

Total free energy in solution  $E_{\text{sol}} = -4190.89503$  a.u.

|    |    |   |           |           |           |
|----|----|---|-----------|-----------|-----------|
| 26 | 1  | 0 | 6.699541  | -0.486781 | -1.068740 |
| 27 | 1  | 0 | 5.490050  | -1.504777 | 0.858285  |
| 28 | 1  | 0 | 5.285454  | 3.349308  | -2.719636 |
| 29 | 1  | 0 | 6.199367  | 2.645490  | -4.076162 |
| 30 | 1  | 0 | 4.510092  | 2.155049  | -3.795014 |
| 31 | 6  | 0 | -2.370906 | 0.656866  | -0.599503 |
| 32 | 6  | 0 | -2.856431 | 2.019392  | -0.581426 |
| 33 | 6  | 0 | -1.659432 | 0.228468  | 0.597472  |
| 34 | 6  | 0 | -1.645024 | 1.041268  | 1.865977  |
| 35 | 6  | 0 | -2.832056 | 2.739299  | 0.625522  |
| 36 | 8  | 0 | -2.407795 | 2.234270  | 1.806791  |
| 37 | 8  | 0 | -2.525921 | -0.087114 | -1.588714 |
| 38 | 6  | 0 | -0.867674 | -0.849765 | 0.621559  |
| 39 | 6  | 0 | -0.165300 | -1.150476 | 1.905187  |
| 40 | 1  | 0 | -2.102665 | 0.454377  | 2.666269  |
| 41 | 1  | 0 | -0.639130 | -1.441438 | -0.256879 |
| 42 | 6  | 0 | 0.775697  | -2.342705 | 1.804248  |
| 43 | 8  | 0 | 1.396042  | -2.797537 | 2.740209  |
| 44 | 1  | 0 | -0.902249 | -1.413953 | 2.674199  |
| 45 | 8  | 0 | 0.839719  | -2.822181 | 0.570310  |
| 46 | 6  | 0 | 1.733136  | -3.927151 | 0.354199  |
| 47 | 1  | 0 | 2.759328  | -3.590371 | 0.493329  |
| 48 | 1  | 0 | 1.505648  | -4.728084 | 1.053349  |
| 49 | 1  | 0 | 1.557060  | -4.231355 | -0.671722 |
| 50 | 6  | 0 | -3.377689 | 2.617355  | -1.741489 |
| 51 | 6  | 0 | -3.850712 | 3.911763  | -1.707617 |
| 52 | 6  | 0 | -3.820579 | 4.619202  | -0.497086 |
| 53 | 6  | 0 | -3.322583 | 4.046107  | 0.660190  |
| 54 | 1  | 0 | -3.387717 | 2.031282  | -2.650657 |
| 55 | 1  | 0 | -4.245258 | 4.375792  | -2.600609 |
| 56 | 1  | 0 | -4.196073 | 5.633876  | -0.460697 |
| 57 | 1  | 0 | -3.305688 | 4.578372  | 1.601160  |
| 58 | 30 | 0 | -2.508765 | -2.072615 | -1.459267 |
| 59 | 17 | 0 | -4.076167 | -2.681015 | -0.092245 |
| 60 | 17 | 0 | -0.937999 | -3.020951 | -2.610381 |

-----

**trans-exo-TS1-V**

Standard orientation:

| Center Number | Atomic Number | Atomic Type | Coordinates (Angstroms) |           |           |
|---------------|---------------|-------------|-------------------------|-----------|-----------|
|               |               |             | X                       | Y         | Z         |
| 1             | 6             | 0           | -2.257388               | -1.662106 | -0.107069 |
| 2             | 7             | 0           | -0.210120               | -1.322637 | 1.025712  |
| 3             | 6             | 0           | -0.815489               | -1.766285 | -0.022143 |
| 4             | 6             | 0           | -0.046011               | -2.337501 | -1.176675 |
| 5             | 6             | 0           | -2.977840               | -0.814885 | 0.705875  |
| 6             | 6             | 0           | -1.020120               | -0.856380 | 2.158959  |
| 7             | 6             | 0           | -2.264758               | -0.049000 | 1.772437  |
| 8             | 1             | 0           | 0.148331                | -1.569221 | -1.929481 |
| 9             | 1             | 0           | -0.612601               | -3.139354 | -1.652022 |
| 10            | 1             | 0           | 0.902873                | -2.749816 | -0.842419 |
| 11            | 6             | 0           | -4.317142               | -0.812668 | 0.225403  |
| 12            | 6             | 0           | -4.350841               | -1.699251 | -0.875864 |
| 13            | 7             | 0           | -3.085183               | -2.191572 | -1.075539 |
| 14            | 1             | 0           | -2.832231               | -2.872127 | -1.768855 |
| 15            | 1             | 0           | -0.375991               | -0.280341 | 2.825323  |
| 16            | 1             | 0           | -1.339239               | -1.750425 | 2.704682  |
| 17            | 1             | 0           | -2.017300               | 0.956307  | 1.415174  |
| 18            | 1             | 0           | -2.882117               | 0.071407  | 2.664881  |
| 19            | 6             | 0           | -5.488567               | -0.142658 | 0.637192  |

Imaginary frequency: -134.3246 cm<sup>-1</sup>

Electronic energy  $E = -4189.676003$  a.u.

Enthalpy  $H = -4189.640552$  a.u.

Entropy  $S = 225.800$  cal/mol/K

Gibbs free energy  $G = -4189.747837$  a.u.

Total free energy in solution  $E_{\text{sol}} = -4190.86100$  a.u.

|    |    |   |           |           |           |
|----|----|---|-----------|-----------|-----------|
| 20 | 6  | 0 | -6.653094 | -0.390527 | -0.059936 |
| 21 | 6  | 0 | -6.673623 | -1.293864 | -1.154712 |
| 22 | 6  | 0 | -5.542169 | -1.952551 | -1.572351 |
| 23 | 1  | 0 | -5.452899 | 0.541887  | 1.472050  |
| 24 | 1  | 0 | -5.574905 | -2.634745 | -2.411965 |
| 25 | 1  | 0 | -7.621520 | -1.443001 | -1.653962 |
| 26 | 8  | 0 | -7.858010 | 0.177702  | 0.215869  |
| 27 | 6  | 0 | -7.901385 | 1.102626  | 1.286120  |
| 28 | 1  | 0 | -7.622362 | 0.624570  | 2.228972  |
| 29 | 1  | 0 | -7.238333 | 1.951049  | 1.097429  |
| 30 | 1  | 0 | -8.929652 | 1.448620  | 1.343727  |
| 31 | 6  | 0 | 2.723512  | -0.829418 | -1.196803 |
| 32 | 6  | 0 | 3.433740  | -2.009286 | -0.651079 |
| 33 | 6  | 0 | 1.975608  | -0.064611 | -0.198587 |
| 34 | 6  | 0 | 1.712451  | -0.647440 | 1.067615  |
| 35 | 6  | 0 | 3.250135  | -2.386449 | 0.676285  |
| 36 | 8  | 0 | 2.432581  | -1.674877 | 1.527959  |
| 37 | 8  | 0 | 2.757149  | -0.544316 | -2.384220 |
| 38 | 6  | 0 | 1.142527  | 1.024026  | -0.685208 |
| 39 | 6  | 0 | 0.321176  | 1.790083  | 0.069891  |
| 40 | 1  | 0 | 1.383081  | -0.028867 | 1.887318  |
| 41 | 1  | 0 | 1.242774  | 1.229923  | -1.746558 |
| 42 | 6  | 0 | -0.562910 | 2.827417  | -0.495219 |
| 43 | 8  | 0 | -1.503187 | 3.290541  | 0.112824  |
| 44 | 1  | 0 | 0.190871  | 1.643057  | 1.134096  |
| 45 | 8  | 0 | -0.235143 | 3.182873  | -1.743404 |
| 46 | 6  | 0 | -1.089163 | 4.174785  | -2.328701 |
| 47 | 1  | 0 | -2.108118 | 3.797804  | -2.396419 |
| 48 | 1  | 0 | -1.079077 | 5.078271  | -1.722816 |
| 49 | 1  | 0 | -0.677943 | 4.365054  | -3.314603 |
| 50 | 6  | 0 | 4.278078  | -2.775372 | -1.459232 |
| 51 | 6  | 0 | 4.927846  | -3.881480 | -0.937760 |
| 52 | 6  | 0 | 4.731385  | -4.237216 | 0.400778  |
| 53 | 6  | 0 | 3.889715  | -3.495720 | 1.216877  |
| 54 | 1  | 0 | 4.403093  | -2.463840 | -2.487798 |
| 55 | 1  | 0 | 5.589284  | -4.468040 | -1.561065 |
| 56 | 1  | 0 | 5.240075  | -5.100279 | 0.810144  |
| 57 | 1  | 0 | 3.722352  | -3.748587 | 2.254774  |
| 58 | 30 | 0 | 2.993624  | 1.890384  | 0.408045  |
| 59 | 17 | 0 | 2.787538  | 2.128740  | 2.573651  |
| 60 | 17 | 0 | 4.241802  | 2.699945  | -1.153178 |

-----

**trans-exo-IM1-V**

Standard orientation:

| Center Number | Atomic Number | Atomic Type | Coordinates (Angstroms) |           |           |
|---------------|---------------|-------------|-------------------------|-----------|-----------|
|               |               |             | X                       | Y         | Z         |
| 1             | 6             | 0           | -2.226377               | -1.491320 | -0.135605 |
| 2             | 7             | 0           | -0.192251               | -0.918802 | 0.874243  |
| 3             | 6             | 0           | -0.797979               | -1.499760 | -0.130570 |
| 4             | 6             | 0           | -0.050781               | -2.103454 | -1.275143 |
| 5             | 6             | 0           | -2.973956               | -0.620664 | 0.641633  |
| 6             | 6             | 0           | -0.989526               | -0.452751 | 2.034410  |
| 7             | 6             | 0           | -2.277873               | 0.256947  | 1.626580  |
| 8             | 1             | 0           | 0.272052                | -1.318497 | -1.964251 |
| 9             | 1             | 0           | -0.691838               | -2.790639 | -1.822820 |
| 10            | 1             | 0           | 0.829633                | -2.645010 | -0.938398 |
| 11            | 6             | 0           | -4.318556               | -0.722787 | 0.210718  |
| 12            | 6             | 0           | -4.337011               | -1.690872 | -0.822048 |
| 13            | 7             | 0           | -3.058837               | -2.126368 | -1.039561 |

Imaginary frequency: -470.2858 cm<sup>-1</sup>  
 Electronic energy  $E = -4189.683933$  a.u.  
 Enthalpy  $H = -4189.648838$  a.u.  
 Entropy  $S = 220.557$  cal/mol/K  
 Gibbs free energy  $G = -4189.753632$  a.u.  
 Total free energy in solution  $E_{\text{sol}} = -4190.87704$  a.u.

|    |    |   |           |           |           |
|----|----|---|-----------|-----------|-----------|
| 14 | 1  | 0 | -2.806742 | -2.876760 | -1.657604 |
| 15 | 1  | 0 | -0.352613 | 0.196260  | 2.630736  |
| 16 | 1  | 0 | -1.232159 | -1.341299 | 2.624470  |
| 17 | 1  | 0 | -2.089744 | 1.245443  | 1.194306  |
| 18 | 1  | 0 | -2.877834 | 0.402641  | 2.526691  |
| 19 | 6  | 0 | -5.510885 | -0.080614 | 0.616010  |
| 20 | 6  | 0 | -6.679811 | -0.443472 | -0.015782 |
| 21 | 6  | 0 | -6.684161 | -1.433076 | -1.039512 |
| 22 | 6  | 0 | -5.537232 | -2.062217 | -1.451920 |
| 23 | 1  | 0 | -5.484077 | 0.668247  | 1.394077  |
| 24 | 1  | 0 | -5.561034 | -2.806401 | -2.237072 |
| 25 | 1  | 0 | -7.639567 | -1.668605 | -1.488889 |
| 26 | 8  | 0 | -7.903020 | 0.076221  | 0.253356  |
| 27 | 6  | 0 | -7.969660 | 1.088181  | 1.243445  |
| 28 | 1  | 0 | -7.642861 | 0.705902  | 2.213842  |
| 29 | 1  | 0 | -7.356982 | 1.948161  | 0.962396  |
| 30 | 1  | 0 | -9.013053 | 1.384238  | 1.300275  |
| 31 | 6  | 0 | 2.676486  | -0.755251 | -1.195889 |
| 32 | 6  | 0 | 3.314568  | -1.988187 | -0.672602 |
| 33 | 6  | 0 | 1.888976  | -0.010881 | -0.219000 |
| 34 | 6  | 0 | 1.312592  | -0.731082 | 0.972946  |
| 35 | 6  | 0 | 2.896656  | -2.524707 | 0.542815  |
| 36 | 8  | 0 | 1.860733  | -1.996640 | 1.271568  |
| 37 | 8  | 0 | 2.839400  | -0.398739 | -2.356844 |
| 38 | 6  | 0 | 1.163831  | 1.136427  | -0.729313 |
| 39 | 6  | 0 | 0.317012  | 1.919509  | -0.018353 |
| 40 | 1  | 0 | 1.409240  | -0.136729 | 1.877229  |
| 41 | 1  | 0 | 1.363917  | 1.372250  | -1.770877 |
| 42 | 6  | 0 | -0.498689 | 2.988016  | -0.601961 |
| 43 | 8  | 0 | -1.459997 | 3.471602  | -0.035300 |
| 44 | 1  | 0 | 0.143930  | 1.773806  | 1.039005  |
| 45 | 8  | 0 | -0.110740 | 3.358520  | -1.831962 |
| 46 | 6  | 0 | -0.907703 | 4.388004  | -2.426411 |
| 47 | 1  | 0 | -1.937774 | 4.052295  | -2.535913 |
| 48 | 1  | 0 | -0.887638 | 5.281967  | -1.806385 |
| 49 | 1  | 0 | -0.457854 | 4.580670  | -3.395221 |
| 50 | 6  | 0 | 4.332976  | -2.622426 | -1.386276 |
| 51 | 6  | 0 | 4.932674  | -3.767160 | -0.885204 |
| 52 | 6  | 0 | 4.504890  | -4.287705 | 0.338543  |
| 53 | 6  | 0 | 3.486203  | -3.675868 | 1.056751  |
| 54 | 1  | 0 | 4.631408  | -2.178978 | -2.327188 |
| 55 | 1  | 0 | 5.729587  | -4.251306 | -1.433437 |
| 56 | 1  | 0 | 4.971234  | -5.178620 | 0.739374  |
| 57 | 1  | 0 | 3.140714  | -4.064194 | 2.005130  |
| 58 | 30 | 0 | 3.169268  | 1.559145  | 0.521934  |
| 59 | 17 | 0 | 2.719668  | 1.821100  | 2.673060  |
| 60 | 17 | 0 | 4.633781  | 2.486094  | -0.773436 |

**trans-exo-TS2-V**

Standard orientation:

| Center Number | Atomic Number | Atomic Type | Coordinates (Angstroms) |          |           |
|---------------|---------------|-------------|-------------------------|----------|-----------|
|               |               |             | X                       | Y        | Z         |
| 1             | 6             | 0           | -1.862926               | 0.961152 | 0.539566  |
| 2             | 7             | 0           | 0.273236                | 1.500825 | -0.383147 |
| 3             | 6             | 0           | -0.416333               | 0.956081 | 0.673102  |
| 4             | 6             | 0           | 0.142585                | 1.159791 | 2.062204  |
| 5             | 6             | 0           | -2.520621               | 1.003071 | -0.665213 |
| 6             | 6             | 0           | -0.506385               | 2.047647 | -1.518777 |

Imaginary frequency: -281.5936 cm<sup>-1</sup>  
 Electronic energy  $E = -4189.665884$  a.u.  
 Enthalpy  $H = -4189.631704$  a.u.  
 Entropy  $S = 214.194$  cal/mol/K  
 Gibbs free energy  $G = -4189.733475$  a.u.  
 Total free energy in solution  $E_{\text{sol}} = -4190.85116$  a.u.



|    |    |   |           |           |           |
|----|----|---|-----------|-----------|-----------|
| 7  | 6  | 0 | -1.727417 | 1.214871  | -1.914951 |
| 8  | 1  | 0 | -0.188544 | 0.377772  | 2.744950  |
| 9  | 1  | 0 | -0.218237 | 2.132840  | 2.408602  |
| 10 | 1  | 0 | 1.227959  | 1.199554  | 2.065011  |
| 11 | 6  | 0 | -3.906866 | 0.810986  | -0.388495 |
| 12 | 6  | 0 | -4.019845 | 0.655292  | 1.017288  |
| 13 | 7  | 0 | -2.759361 | 0.747590  | 1.563601  |
| 14 | 1  | 0 | -2.536645 | 0.673802  | 2.539831  |
| 15 | 1  | 0 | 0.189897  | 2.175200  | -2.345190 |
| 16 | 1  | 0 | -0.846646 | 3.038776  | -1.212802 |
| 17 | 1  | 0 | -1.435266 | 0.262488  | -2.372406 |
| 18 | 1  | 0 | -2.299137 | 1.766098  | -2.664321 |
| 19 | 6  | 0 | -5.054639 | 0.762335  | -1.189203 |
| 20 | 6  | 0 | -6.281617 | 0.559954  | -0.581888 |
| 21 | 6  | 0 | -6.381071 | 0.410426  | 0.820162  |
| 22 | 6  | 0 | -5.257476 | 0.460508  | 1.627357  |
| 23 | 1  | 0 | -5.011108 | 0.867978  | -2.264915 |
| 24 | 1  | 0 | -5.348205 | 0.343654  | 2.699760  |
| 25 | 1  | 0 | -7.344318 | 0.253371  | 1.282858  |
| 26 | 8  | 0 | -7.359894 | 0.519993  | -1.415846 |
| 27 | 6  | 0 | -8.626117 | 0.242438  | -0.850744 |
| 28 | 1  | 0 | -8.631143 | -0.727548 | -0.346478 |
| 29 | 1  | 0 | -8.928104 | 1.022388  | -0.146326 |
| 30 | 1  | 0 | -9.325072 | 0.220325  | -1.682528 |
| 31 | 6  | 0 | 3.311993  | 0.269765  | 0.931862  |
| 32 | 6  | 0 | 3.829456  | 1.628001  | 0.674101  |
| 33 | 6  | 0 | 2.143898  | -0.118582 | 0.100717  |
| 34 | 6  | 0 | 1.554138  | 0.870062  | -0.856749 |
| 35 | 6  | 0 | 3.345925  | 2.378612  | -0.398794 |
| 36 | 8  | 0 | 2.438237  | 1.875116  | -1.287431 |
| 37 | 8  | 0 | 3.747672  | -0.445194 | 1.816177  |
| 38 | 6  | 0 | 1.260354  | -1.025589 | 0.693778  |
| 39 | 6  | 0 | -0.083206 | -1.115283 | 0.304661  |
| 40 | 1  | 0 | 1.267375  | 0.354262  | -1.774545 |
| 41 | 1  | 0 | 1.603982  | -1.512570 | 1.602959  |
| 42 | 6  | 0 | -1.065585 | -1.916019 | 1.058230  |
| 43 | 8  | 0 | -2.115917 | -2.303740 | 0.606693  |
| 44 | 1  | 0 | -0.356654 | -0.992039 | -0.734490 |
| 45 | 8  | 0 | -0.698386 | -2.101456 | 2.346293  |
| 46 | 6  | 0 | -1.628197 | -2.878756 | 3.113628  |
| 47 | 1  | 0 | -2.593648 | -2.375557 | 3.150532  |
| 48 | 1  | 0 | -1.758097 | -3.859314 | 2.661115  |
| 49 | 1  | 0 | -1.191903 | -2.963992 | 4.103808  |
| 50 | 6  | 0 | 4.808906  | 2.173946  | 1.510194  |
| 51 | 6  | 0 | 5.299846  | 3.445988  | 1.273753  |
| 52 | 6  | 0 | 4.811240  | 4.181125  | 0.189005  |
| 53 | 6  | 0 | 3.838692  | 3.656037  | -0.649622 |
| 54 | 1  | 0 | 5.165970  | 1.563599  | 2.329389  |
| 55 | 1  | 0 | 6.059794  | 3.867031  | 1.917910  |
| 56 | 1  | 0 | 5.194281  | 5.175246  | -0.003494 |
| 57 | 1  | 0 | 3.453701  | 4.207143  | -1.496661 |
| 58 | 30 | 0 | 2.631817  | -1.999841 | -1.022471 |
| 59 | 17 | 0 | 1.528433  | -1.890526 | -2.910886 |
| 60 | 17 | 0 | 4.009924  | -3.399775 | -0.149686 |

**trans-exo-IM2-V**

Standard orientation:

Center Atomic Atomic Coordinates (Angstroms)  
Number Number Type X Y Z

Imaginary frequency: -470.2858 cm<sup>-1</sup>

Electronic energy  $E = -4189.701992$  a.u.

Enthalpy  $H = -4189.668253$  a.u.

Entropy  $S = 210.074$  cal/mol/K

Gibbs free energy  $G = -4189.768066$  a.u.

Total free energy in solution  $E_{\text{sol}} = -4190.88169$  a.u.

|    |    |   |           |           |           |
|----|----|---|-----------|-----------|-----------|
| 1  | 6  | 0 | -1.897643 | 0.324100  | 0.946899  |
| 2  | 7  | 0 | 0.224338  | 1.547605  | 0.848333  |
| 3  | 6  | 0 | -0.448183 | 0.319972  | 1.368409  |
| 4  | 6  | 0 | -0.276854 | 0.295432  | 2.890398  |
| 5  | 6  | 0 | -2.512852 | 1.286467  | 0.191083  |
| 6  | 6  | 0 | -0.654908 | 2.722284  | 0.783455  |
| 7  | 6  | 0 | -1.819640 | 2.553634  | -0.194130 |
| 8  | 1  | 0 | -0.808616 | -0.542184 | 3.339248  |
| 9  | 1  | 0 | -0.667434 | 1.220942  | 3.312715  |
| 10 | 1  | 0 | 0.784704  | 0.228886  | 3.135493  |
| 11 | 6  | 0 | -3.875540 | 0.869023  | 0.015476  |
| 12 | 6  | 0 | -4.015207 | -0.360854 | 0.701059  |
| 13 | 7  | 0 | -2.794068 | -0.673386 | 1.260553  |
| 14 | 1  | 0 | -2.575586 | -1.491928 | 1.803260  |
| 15 | 1  | 0 | -0.040661 | 3.585826  | 0.541376  |
| 16 | 1  | 0 | -1.053672 | 2.873058  | 1.788216  |
| 17 | 1  | 0 | -1.455063 | 2.537354  | -1.226594 |
| 18 | 1  | 0 | -2.498981 | 3.406412  | -0.110864 |
| 19 | 6  | 0 | -4.977491 | 1.424572  | -0.640922 |
| 20 | 6  | 0 | -6.187881 | 0.748236  | -0.605884 |
| 21 | 6  | 0 | -6.314665 | -0.477349 | 0.078699  |
| 22 | 6  | 0 | -5.230134 | -1.039321 | 0.736535  |
| 23 | 1  | 0 | -4.916065 | 2.361001  | -1.179868 |
| 24 | 1  | 0 | -5.336367 | -1.980353 | 1.261265  |
| 25 | 1  | 0 | -7.260971 | -0.997176 | 0.100105  |
| 26 | 8  | 0 | -7.221822 | 1.346827  | -1.272060 |
| 27 | 6  | 0 | -8.473404 | 0.693019  | -1.265633 |
| 28 | 1  | 0 | -8.411382 | -0.291735 | -1.737454 |
| 29 | 1  | 0 | -8.861271 | 0.583698  | -0.248928 |
| 30 | 1  | 0 | -9.145007 | 1.325450  | -1.840775 |
| 31 | 6  | 0 | 3.550725  | 0.896523  | 0.208936  |
| 32 | 6  | 0 | 3.708187  | 2.344933  | 0.057014  |
| 33 | 6  | 0 | 2.139769  | 0.422412  | 0.087487  |
| 34 | 6  | 0 | 1.031743  | 1.333535  | -0.368973 |
| 35 | 6  | 0 | 2.647780  | 3.113630  | -0.435266 |
| 36 | 8  | 0 | 1.477486  | 2.571748  | -0.876137 |
| 37 | 8  | 0 | 4.448395  | 0.123349  | 0.478885  |
| 38 | 6  | 0 | 1.740793  | -0.715749 | 0.670500  |
| 39 | 6  | 0 | 0.248000  | -0.914735 | 0.701151  |
| 40 | 1  | 0 | 0.472994  | 0.888429  | -1.201745 |
| 41 | 1  | 0 | 2.434395  | -1.299546 | 1.272860  |
| 42 | 6  | 0 | -0.069786 | -2.296725 | 1.212259  |
| 43 | 8  | 0 | -0.866247 | -2.662460 | 2.033865  |
| 44 | 1  | 0 | -0.116416 | -0.935161 | -0.335830 |
| 45 | 8  | 0 | 0.725798  | -3.174210 | 0.539019  |
| 46 | 6  | 0 | 0.584656  | -4.580540 | 0.872910  |
| 47 | 1  | 0 | 0.685057  | -4.697512 | 1.947657  |
| 48 | 1  | 0 | -0.390388 | -4.922668 | 0.538053  |
| 49 | 1  | 0 | 1.393848  | -5.073941 | 0.346459  |
| 50 | 6  | 0 | 4.913191  | 2.966003  | 0.406664  |
| 51 | 6  | 0 | 5.059051  | 4.333548  | 0.269571  |
| 52 | 6  | 0 | 3.992183  | 5.090084  | -0.228790 |
| 53 | 6  | 0 | 2.792909  | 4.491515  | -0.583656 |
| 54 | 1  | 0 | 5.712344  | 2.339253  | 0.780527  |
| 55 | 1  | 0 | 5.988204  | 4.815571  | 0.540678  |
| 56 | 1  | 0 | 4.100623  | 6.161279  | -0.342688 |
| 57 | 1  | 0 | 1.965640  | 5.062049  | -0.983689 |
| 58 | 30 | 0 | 2.141601  | -2.364203 | -0.942659 |
| 59 | 17 | 0 | 0.973469  | -1.718390 | -2.659924 |
| 60 | 17 | 0 | 3.809029  | -3.637748 | -0.426077 |

---

**trans-COM-VI**

Standard orientation:

| Center Number | Atomic Number | Atomic Type | Coordinates (Angstroms) |           |           |
|---------------|---------------|-------------|-------------------------|-----------|-----------|
|               |               |             | X                       | Y         | Z         |
| 1             | 6             | 0           | -2.008240               | -1.227604 | -0.145232 |
| 2             | 6             | 0           | -3.343329               | -0.609463 | -0.068513 |
| 3             | 6             | 0           | -0.953447               | -0.311820 | -0.607033 |
| 4             | 6             | 0           | -1.241539               | 0.984193  | -0.873273 |
| 5             | 6             | 0           | -3.516501               | 0.731815  | -0.404438 |
| 6             | 8             | 0           | -2.461419               | 1.519626  | -0.796602 |
| 7             | 8             | 0           | -1.785408               | -2.393567 | 0.134066  |
| 8             | 6             | 0           | 0.409315                | -0.828315 | -0.683000 |
| 9             | 6             | 0           | 1.337963                | -0.389599 | -1.558386 |
| 10            | 1             | 0           | -0.497275               | 1.723900  | -1.144380 |
| 11            | 1             | 0           | 0.631072                | -1.643889 | 0.000868  |
| 12            | 6             | 0           | 2.734156                | -0.891529 | -1.539100 |
| 13            | 8             | 0           | 3.430228                | -1.163847 | -2.470346 |
| 14            | 1             | 0           | 1.104728                | 0.308253  | -2.351812 |
| 15            | 8             | 0           | 3.166516                | -0.966109 | -0.233843 |
| 16            | 6             | 0           | 4.521222                | -1.435327 | -0.028501 |
| 17            | 1             | 0           | 4.623251                | -2.417126 | -0.480920 |
| 18            | 1             | 0           | 5.213344                | -0.732489 | -0.484834 |
| 19            | 1             | 0           | 4.645432                | -1.480548 | 1.048159  |
| 20            | 6             | 0           | -4.458352               | -1.353544 | 0.334265  |
| 21            | 6             | 0           | -5.705547               | -0.760439 | 0.392511  |
| 22            | 6             | 0           | -5.854075               | 0.589853  | 0.048358  |
| 23            | 6             | 0           | -4.764887               | 1.345265  | -0.351569 |
| 24            | 1             | 0           | -4.301703               | -2.392635 | 0.591927  |
| 25            | 1             | 0           | -6.567391               | -1.335018 | 0.704031  |
| 26            | 1             | 0           | -6.831007               | 1.052925  | 0.096023  |
| 27            | 1             | 0           | -4.852912               | 2.389527  | -0.617726 |
| 28            | 30            | 0           | 2.005800                | 0.538184  | 0.713389  |
| 29            | 17            | 0           | 2.364285                | 2.471273  | -0.218943 |
| 30            | 17            | 0           | 1.454462                | -0.274105 | 2.635076  |

Imaginary frequency: none  
 Electronic energy  $E = -3501.475951$  a.u.  
 Enthalpy  $H = -3501.454852$  a.u.  
 Entropy  $S = 155.351$  cal/mol/K  
 Gibbs free energy  $G = -3501.528665$  a.u.  
 Total free energy in solution  $E_{\text{sol}} = -3502.21394$  a.u.

**trans-endo-TS1-VI**

Standard orientation:

| Center Number | Atomic Number | Atomic Type | Coordinates (Angstroms) |          |           |
|---------------|---------------|-------------|-------------------------|----------|-----------|
|               |               |             | X                       | Y        | Z         |
| 1             | 6             | 0           | 2.278436                | 1.194667 | 1.100438  |
| 2             | 7             | 0           | 0.052574                | 1.494013 | 0.370116  |
| 3             | 6             | 0           | 0.856810                | 1.321801 | 1.360480  |
| 4             | 6             | 0           | 0.347294                | 1.198269 | 2.767237  |
| 5             | 6             | 0           | 2.770295                | 0.932307 | -0.158107 |
| 6             | 6             | 0           | 0.596805                | 1.708474 | -0.969657 |
| 7             | 6             | 0           | 1.815011                | 0.844408 | -1.306348 |
| 8             | 1             | 0           | 0.375579                | 0.154385 | 3.087343  |
| 9             | 1             | 0           | -0.672034               | 1.566963 | 2.846030  |
| 10            | 1             | 0           | 0.974904                | 1.785777 | 3.441147  |
| 11            | 6             | 0           | 4.167920                | 0.697672 | -0.018402 |
| 12            | 6             | 0           | 4.465100                | 0.846051 | 1.356602  |
| 13            | 7             | 0           | 3.299862                | 1.134829 | 2.022862  |
| 14            | 1             | 0           | 3.217590                | 1.292120 | 3.011235  |
| 15            | 1             | 0           | 0.880628                | 2.764911 | -1.027024 |
| 16            | 1             | 0           | -0.209527               | 1.537659 | -1.683265 |
| 17            | 1             | 0           | 2.256057                | 1.211464 | -2.234767 |

Imaginary frequency:  $-266.7123$  cm<sup>-1</sup>  
 Electronic energy  $E = -4189.673802$  a.u.  
 Enthalpy  $H = -4189.639110$  a.u.  
 Entropy  $S = 217.179$  cal/mol/K  
 Gibbs free energy  $G = -4189.742298$  a.u.  
 Total free energy in solution  $E_{\text{sol}} = -4190.39687$  a.u.

|    |    |   |           |           |           |
|----|----|---|-----------|-----------|-----------|
| 18 | 1  | 0 | 1.519681  | -0.196657 | -1.478748 |
| 19 | 6  | 0 | 5.192039  | 0.385045  | -0.937305 |
| 20 | 6  | 0 | 6.475171  | 0.238145  | -0.450734 |
| 21 | 6  | 0 | 6.757782  | 0.396720  | 0.930659  |
| 22 | 6  | 0 | 5.773591  | 0.700690  | 1.840576  |
| 23 | 8  | 0 | 7.563815  | -0.059274 | -1.211644 |
| 24 | 6  | 0 | 7.351113  | -0.225068 | -2.600114 |
| 25 | 1  | 0 | 4.959763  | 0.270509  | -1.986112 |
| 26 | 1  | 0 | 7.785345  | 0.268287  | 1.242908  |
| 27 | 1  | 0 | 6.005523  | 0.817089  | 2.891311  |
| 28 | 1  | 0 | 6.959528  | 0.691693  | -3.049170 |
| 29 | 1  | 0 | 8.322612  | -0.454778 | -3.028980 |
| 30 | 1  | 0 | 6.660020  | -1.049502 | -2.795519 |
| 31 | 30 | 0 | -2.070067 | -2.918733 | 0.759299  |
| 32 | 17 | 0 | -1.240417 | -2.111545 | 2.624487  |
| 33 | 17 | 0 | -3.794758 | -4.092234 | 0.170648  |
| 34 | 6  | 0 | -3.059308 | 1.799229  | -1.588778 |
| 35 | 6  | 0 | -3.250832 | 3.099875  | -0.902930 |
| 36 | 6  | 0 | -2.385513 | 0.792760  | -0.776983 |
| 37 | 6  | 0 | -1.974556 | 1.100919  | 0.531010  |
| 38 | 6  | 0 | -2.909856 | 3.246867  | 0.438549  |
| 39 | 8  | 0 | -2.399735 | 2.198390  | 1.172441  |
| 40 | 8  | 0 | -3.422046 | 1.616769  | -2.742574 |
| 41 | 6  | 0 | -2.071798 | -0.458597 | -1.349595 |
| 42 | 6  | 0 | -1.239186 | -1.412908 | -0.816519 |
| 43 | 1  | 0 | -1.753516 | 0.305186  | 1.230360  |
| 44 | 1  | 0 | -2.536139 | -0.663991 | -2.310274 |
| 45 | 6  | 0 | -0.975462 | -2.649504 | -1.555418 |
| 46 | 8  | 0 | -1.119428 | -2.902241 | -2.717778 |
| 47 | 1  | 0 | -0.580248 | -1.192492 | 0.017424  |
| 48 | 8  | 0 | -0.578692 | -3.617251 | -0.630984 |
| 49 | 6  | 0 | -0.458103 | -4.958478 | -1.154813 |
| 50 | 1  | 0 | -1.435664 | -5.303303 | -1.483038 |
| 51 | 1  | 0 | 0.243724  | -4.952830 | -1.983800 |
| 52 | 1  | 0 | -0.087721 | -5.557651 | -0.329540 |
| 53 | 6  | 0 | -3.793223 | 4.193870  | -1.581725 |
| 54 | 6  | 0 | -3.982650 | 5.399944  | -0.927794 |
| 55 | 6  | 0 | -3.635534 | 5.521337  | 0.421563  |
| 56 | 6  | 0 | -3.099419 | 4.446187  | 1.115029  |
| 57 | 1  | 0 | -4.058020 | 4.054015  | -2.621537 |
| 58 | 1  | 0 | -4.402137 | 6.245781  | -1.455865 |
| 59 | 1  | 0 | -3.786785 | 6.461711  | 0.935496  |
| 60 | 1  | 0 | -2.829118 | 4.512754  | 2.160061  |

**trans-endo-IM1-VI**

Standard orientation:

| Center Number | Atomic Number | Atomic Type | Coordinates (Angstroms) |           |           |
|---------------|---------------|-------------|-------------------------|-----------|-----------|
|               |               |             | X                       | Y         | Z         |
| 1             | 6             | 0           | -1.554025               | -1.151688 | 1.646639  |
| 2             | 7             | 0           | 0.758252                | -1.528911 | 1.556299  |
| 3             | 6             | 0           | -0.240066               | -0.885496 | 2.131533  |
| 4             | 6             | 0           | -0.075797               | 0.030320  | 3.307882  |
| 5             | 6             | 0           | -1.808598               | -1.836620 | 0.468778  |
| 6             | 6             | 0           | 0.448446                | -2.714545 | 0.724053  |
| 7             | 6             | 0           | -0.690262               | -2.498282 | -0.269638 |

Imaginary frequency: none

Electronic energy  $E = -4189.679339$  a.u.

Enthalpy  $H = -4189.644420$  a.u.

Entropy  $S = 219.459$  cal/mol/K

Gibbs free energy  $G = -4189.748692$  a.u.

Total free energy in solution  $E_{\text{sol}} = -4190.39806$  a.u.

|    |    |   |           |           |           |
|----|----|---|-----------|-----------|-----------|
| 8  | 1  | 0 | -0.587311 | 0.976638  | 3.129309  |
| 9  | 1  | 0 | 0.961612  | 0.213123  | 3.572348  |
| 10 | 1  | 0 | -0.550610 | -0.467200 | 4.159233  |
| 11 | 6  | 0 | -3.187887 | -1.676606 | 0.188449  |
| 12 | 6  | 0 | -3.718348 | -0.880771 | 1.232055  |
| 13 | 7  | 0 | -2.724674 | -0.602013 | 2.134155  |
| 14 | 1  | 0 | -2.744416 | 0.217116  | 2.720948  |
| 15 | 1  | 0 | 0.161332  | -3.498502 | 1.428662  |
| 16 | 1  | 0 | 1.363483  | -3.020578 | 0.227364  |
| 17 | 1  | 0 | -0.987851 | -3.475815 | -0.655165 |
| 18 | 1  | 0 | -0.374420 | -1.891147 | -1.122618 |
| 19 | 6  | 0 | -4.016283 | -2.132195 | -0.862396 |
| 20 | 6  | 0 | -5.341395 | -1.755998 | -0.840723 |
| 21 | 6  | 0 | -5.856402 | -0.941207 | 0.206224  |
| 22 | 6  | 0 | -5.070263 | -0.501190 | 1.241391  |
| 23 | 8  | 0 | -6.263988 | -2.103415 | -1.773647 |
| 24 | 6  | 0 | -5.819144 | -2.907121 | -2.851705 |
| 25 | 1  | 0 | -3.603964 | -2.746020 | -1.649774 |
| 26 | 1  | 0 | -6.905345 | -0.681731 | 0.154544  |
| 27 | 1  | 0 | -5.478868 | 0.115876  | 2.030329  |
| 28 | 1  | 0 | -5.437340 | -3.865937 | -2.491727 |
| 29 | 1  | 0 | -6.688565 | -3.073486 | -3.481252 |
| 30 | 1  | 0 | -5.042118 | -2.395448 | -3.425246 |
| 31 | 6  | 0 | 2.616665  | -1.170650 | -1.188500 |
| 32 | 6  | 0 | 3.592015  | -2.200590 | -0.745319 |
| 33 | 6  | 0 | 2.027100  | -0.383212 | -0.113720 |
| 34 | 6  | 0 | 2.105190  | -0.873013 | 1.297224  |
| 35 | 6  | 0 | 3.806822  | -2.438411 | 0.611972  |
| 36 | 8  | 0 | 3.115706  | -1.788722 | 1.607357  |
| 37 | 8  | 0 | 2.353137  | -1.012248 | -2.373457 |
| 38 | 6  | 0 | 1.172880  | 0.650035  | -0.425572 |
| 39 | 6  | 0 | 0.548425  | 1.498727  | 0.517076  |
| 40 | 1  | 0 | 2.192578  | -0.070597 | 2.021241  |
| 41 | 1  | 0 | 0.968920  | 0.789440  | -1.484096 |
| 42 | 6  | 0 | -0.806536 | 2.012258  | 0.313827  |
| 43 | 8  | 0 | -1.705150 | 2.016196  | 1.127476  |
| 44 | 1  | 0 | 0.793171  | 1.396543  | 1.559801  |
| 45 | 8  | 0 | -0.932180 | 2.577653  | -0.922508 |
| 46 | 6  | 0 | -2.182537 | 3.246824  | -1.174054 |
| 47 | 1  | 0 | -3.001887 | 2.540521  | -1.062845 |
| 48 | 1  | 0 | -2.292973 | 4.069752  | -0.470930 |
| 49 | 1  | 0 | -2.111534 | 3.609687  | -2.193801 |
| 50 | 6  | 0 | 4.325161  | -2.926875 | -1.686462 |
| 51 | 6  | 0 | 5.261031  | -3.864704 | -1.281476 |
| 52 | 6  | 0 | 5.467166  | -4.083243 | 0.082871  |
| 53 | 6  | 0 | 4.743055  | -3.377192 | 1.034002  |
| 54 | 1  | 0 | 4.135903  | -2.716191 | -2.730958 |
| 55 | 1  | 0 | 5.831542  | -4.419588 | -2.013984 |
| 56 | 1  | 0 | 6.198961  | -4.811113 | 0.409543  |
| 57 | 1  | 0 | 4.886519  | -3.534081 | 2.094448  |
| 58 | 30 | 0 | 1.175168  | 3.434415  | -0.351356 |
| 59 | 17 | 0 | 0.500695  | 5.006484  | 1.025239  |
| 60 | 17 | 0 | 2.428977  | 3.445028  | -2.126774 |

**trans-endo-TS2-VI**

Standard orientation:

| Center Number | Atomic Number | Atomic Type | Coordinates (Angstroms) |           |           |
|---------------|---------------|-------------|-------------------------|-----------|-----------|
|               |               |             | X                       | Y         | Z         |
| 1             | 6             | 0           | 1.684207                | -0.652116 | -1.548653 |

Imaginary frequency: -200.7544 cm<sup>-1</sup>  
 Electronic energy  $E = -4189.671961$  a.u.  
 Enthalpy  $H = -4189.638015$  a.u.  
 Entropy  $S = 213.148$  cal/mol/K  
 Gibbs free energy  $G = -4189.739288$  a.u.  
 Total free energy in solution  $E_{sol} = -4190.38352$  a.u.

|    |    |   |           |           |           |
|----|----|---|-----------|-----------|-----------|
| 2  | 7  | 0 | -0.544585 | -1.444508 | -1.699379 |
| 3  | 6  | 0 | 0.347204  | -0.499008 | -2.083875 |
| 4  | 6  | 0 | 0.171006  | 0.173501  | -3.425065 |
| 5  | 6  | 0 | 2.009284  | -1.464539 | -0.486404 |
| 6  | 6  | 0 | -0.078226 | -2.630921 | -0.944193 |
| 7  | 1  | 0 | 0.634745  | 1.158214  | -3.438151 |
| 8  | 1  | 0 | -0.878610 | 0.272014  | -3.697334 |
| 9  | 1  | 0 | 0.649019  | -0.461065 | -4.176258 |
| 10 | 6  | 0 | 3.381182  | -1.223810 | -0.186789 |
| 11 | 6  | 0 | 3.828246  | -0.247309 | -1.106230 |
| 12 | 7  | 0 | 2.790199  | 0.066036  | -1.953968 |
| 13 | 1  | 0 | 2.727602  | 0.933215  | -2.463267 |
| 14 | 1  | 0 | 0.351723  | -3.301830 | -1.690977 |
| 15 | 1  | 0 | -0.953878 | -3.120070 | -0.526575 |
| 16 | 6  | 0 | 4.263033  | -1.746957 | 0.781532  |
| 17 | 6  | 0 | 5.555182  | -1.260179 | 0.808511  |
| 18 | 6  | 0 | 5.985623  | -0.271150 | -0.112076 |
| 19 | 6  | 0 | 5.142083  | 0.238600  | -1.071794 |
| 20 | 8  | 0 | 6.514479  | -1.660176 | 1.687951  |
| 21 | 6  | 0 | 6.144981  | -2.637921 | 2.640470  |
| 22 | 1  | 0 | 3.917298  | -2.496045 | 1.479006  |
| 23 | 1  | 0 | 7.010131  | 0.066452  | -0.032710 |
| 24 | 1  | 0 | 5.485401  | 0.988713  | -1.772346 |
| 25 | 1  | 0 | 5.835592  | -3.565519 | 2.151127  |
| 26 | 1  | 0 | 7.030492  | -2.822082 | 3.242724  |
| 27 | 1  | 0 | 5.335202  | -2.276824 | 3.280241  |
| 28 | 6  | 0 | -2.289027 | -1.298824 | 1.112090  |
| 29 | 6  | 0 | -3.189380 | -2.413141 | 0.744886  |
| 30 | 6  | 0 | -1.849263 | -0.471863 | -0.016444 |
| 31 | 6  | 0 | -1.952109 | -0.989223 | -1.410582 |
| 32 | 6  | 0 | -3.439557 | -2.705107 | -0.597677 |
| 33 | 8  | 0 | -2.851380 | -2.038119 | -1.639911 |
| 34 | 8  | 0 | -1.949113 | -1.081373 | 2.265416  |
| 35 | 6  | 0 | -0.998262 | 0.586401  | 0.198774  |
| 36 | 6  | 0 | -0.432040 | 1.283033  | -0.893847 |
| 37 | 1  | 0 | -2.190051 | -0.225743 | -2.146279 |
| 38 | 1  | 0 | -0.626147 | 0.710084  | 1.215361  |
| 39 | 6  | 0 | 0.609878  | 2.300944  | -0.725436 |
| 40 | 8  | 0 | 1.444695  | 2.637959  | -1.528831 |
| 41 | 1  | 0 | -1.004336 | 1.429890  | -1.795823 |
| 42 | 8  | 0 | 0.500204  | 2.904255  | 0.502255  |
| 43 | 6  | 0 | 1.456940  | 3.943301  | 0.809985  |
| 44 | 1  | 0 | 2.457430  | 3.521626  | 0.769172  |
| 45 | 1  | 0 | 1.353730  | 4.749898  | 0.088535  |
| 46 | 1  | 0 | 1.203798  | 4.268547  | 1.813535  |
| 47 | 6  | 0 | -3.815036 | -3.172114 | 1.738443  |
| 48 | 6  | 0 | -4.683424 | -4.195715 | 1.400626  |
| 49 | 6  | 0 | -4.928109 | -4.469313 | 0.051549  |
| 50 | 6  | 0 | -4.310561 | -3.733194 | -0.949123 |
| 51 | 1  | 0 | -3.598422 | -2.918161 | 2.767963  |
| 52 | 1  | 0 | -5.171532 | -4.776347 | 2.171546  |
| 53 | 1  | 0 | -5.607842 | -5.265914 | -0.222881 |
| 54 | 1  | 0 | -4.484742 | -3.933566 | -1.997425 |
| 55 | 6  | 0 | 0.977840  | -2.357034 | 0.127436  |
| 56 | 1  | 0 | 1.409233  | -3.315755 | 0.425967  |
| 57 | 1  | 0 | 0.539812  | -1.906975 | 1.022826  |
| 58 | 30 | 0 | -1.647672 | 2.939058  | 0.671095  |
| 59 | 17 | 0 | -2.436552 | 3.978851  | -1.072124 |
| 60 | 17 | 0 | -1.947919 | 2.912111  | 2.809822  |

-----  
**trans-endo-IM2-VI**

Imaginary frequency: none

| Standard orientation: |        |        |                         |           |           | Electronic energy $E = -4189.703343$ a.u.                         |
|-----------------------|--------|--------|-------------------------|-----------|-----------|-------------------------------------------------------------------|
| -----                 |        |        |                         |           |           | Enthalpy $H = -4189.669619$ a.u.                                  |
| Center                | Atomic | Atomic | Coordinates (Angstroms) |           |           | Entropy $S = 209.792$ cal/mol/K                                   |
| Number                | Number | Type   | X                       | Y         | Z         | Gibbs free energy $G = -4189.769298$ a.u.                         |
| -----                 |        |        |                         |           |           | Total free energy in solution $E_{\text{sol}} = -4190.40954$ a.u. |
| 1                     | 6      | 0      | 1.384174                | -0.975821 | 1.275503  |                                                                   |
| 2                     | 7      | 0      | -0.112902               | 0.710723  | 2.246717  |                                                                   |
| 3                     | 6      | 0      | 0.073397                | -0.741045 | 1.986450  |                                                                   |
| 4                     | 6      | 0      | 0.003139                | -1.484144 | 3.326394  |                                                                   |
| 5                     | 6      | 0      | 2.290172                | -0.014067 | 0.914160  |                                                                   |
| 6                     | 6      | 0      | 1.139713                | 1.436164  | 2.488211  |                                                                   |
| 7                     | 1      | 0      | 0.179996                | -2.551185 | 3.199931  |                                                                   |
| 8                     | 1      | 0      | -0.976607               | -1.327521 | 3.780492  |                                                                   |
| 9                     | 1      | 0      | 0.761836                | -1.082871 | 3.997981  |                                                                   |
| 10                    | 6      | 0      | 3.366395                | -0.684574 | 0.243560  |                                                                   |
| 11                    | 6      | 0      | 3.048881                | -2.058145 | 0.241861  |                                                                   |
| 12                    | 7      | 0      | 1.833052                | -2.213360 | 0.872688  |                                                                   |
| 13                    | 1      | 0      | 1.354684                | -3.082182 | 1.041801  |                                                                   |
| 14                    | 1      | 0      | 1.619095                | 0.950087  | 3.340547  |                                                                   |
| 15                    | 1      | 0      | 0.886951                | 2.447659  | 2.793622  |                                                                   |
| 16                    | 6      | 0      | 4.563963                | -0.235984 | -0.343676 |                                                                   |
| 17                    | 6      | 0      | 5.402217                | -1.177989 | -0.913372 |                                                                   |
| 18                    | 6      | 0      | 5.071207                | -2.552317 | -0.905129 |                                                                   |
| 19                    | 6      | 0      | 3.902129                | -3.005806 | -0.333516 |                                                                   |
| 20                    | 8      | 0      | 6.591113                | -0.887742 | -1.519626 |                                                                   |
| 21                    | 6      | 0      | 6.959731                | 0.473631  | -1.587222 |                                                                   |
| 22                    | 1      | 0      | 4.803532                | 0.817968  | -0.346220 |                                                                   |
| 23                    | 1      | 0      | 5.770195                | -3.236452 | -1.366931 |                                                                   |
| 24                    | 1      | 0      | 3.658741                | -4.060833 | -0.333544 |                                                                   |
| 25                    | 1      | 0      | 7.079009                | 0.901134  | -0.587572 |                                                                   |
| 26                    | 1      | 0      | 7.912026                | 0.504035  | -2.110339 |                                                                   |
| 27                    | 1      | 0      | 6.218479                | 1.055644  | -2.142336 |                                                                   |
| 28                    | 6      | 0      | -0.701831               | 1.869579  | -1.191570 |                                                                   |
| 29                    | 6      | 0      | -0.491053               | 3.262008  | -0.786616 |                                                                   |
| 30                    | 6      | 0      | -0.974467               | 0.940085  | -0.056261 |                                                                   |
| 31                    | 6      | 0      | -1.092224               | 1.403477  | 1.368812  |                                                                   |
| 32                    | 6      | 0      | -0.632431               | 3.640223  | 0.554801  |                                                                   |
| 33                    | 8      | 0      | -0.984050               | 2.796435  | 1.561037  |                                                                   |
| 34                    | 8      | 0      | -0.656846               | 1.466053  | -2.336719 |                                                                   |
| 35                    | 6      | 0      | -1.027370               | -0.391185 | -0.215090 |                                                                   |
| 36                    | 6      | 0      | -1.108447               | -1.179078 | 1.069721  |                                                                   |
| 37                    | 1      | 0      | -2.094625               | 1.145131  | 1.722383  |                                                                   |
| 38                    | 1      | 0      | -0.754172               | -0.841976 | -1.167534 |                                                                   |
| 39                    | 6      | 0      | -1.293010               | -2.642635 | 0.759538  |                                                                   |
| 40                    | 8      | 0      | -0.688775               | -3.606657 | 1.143145  |                                                                   |
| 41                    | 1      | 0      | -2.025072               | -0.906666 | 1.613614  |                                                                   |
| 42                    | 8      | 0      | -2.353961               | -2.748057 | -0.090235 |                                                                   |
| 43                    | 6      | 0      | -2.691827               | -4.081651 | -0.557355 |                                                                   |
| 44                    | 1      | 0      | -1.807092               | -4.534311 | -0.994372 |                                                                   |
| 45                    | 1      | 0      | -3.047776               | -4.666263 | 0.285967  |                                                                   |
| 46                    | 1      | 0      | -3.462519               | -3.930223 | -1.304525 |                                                                   |
| 47                    | 6      | 0      | -0.146797               | 4.224700  | -1.745757 |                                                                   |
| 48                    | 6      | 0      | 0.052714                | 5.541004  | -1.380184 |                                                                   |
| 49                    | 6      | 0      | -0.096286               | 5.906376  | -0.036234 |                                                                   |
| 50                    | 6      | 0      | -0.436323               | 4.971356  | 0.926813  |                                                                   |
| 51                    | 1      | 0      | -0.048617               | 3.893375  | -2.771321 |                                                                   |
| 52                    | 1      | 0      | 0.317377                | 6.282744  | -2.121144 |                                                                   |
| 53                    | 1      | 0      | 0.054575                | 6.936444  | 0.260769  |                                                                   |
| 54                    | 1      | 0      | -0.562020               | 5.241170  | 1.966444  |                                                                   |
| 55                    | 6      | 0      | 2.115261                | 1.417174  | 1.308107  |                                                                   |
| 56                    | 1      | 0      | 3.069784                | 1.853150  | 1.617456  |                                                                   |
| 57                    | 1      | 0      | 1.742836                | 2.034605  | 0.482960  |                                                                   |

|    |    |   |           |           |           |
|----|----|---|-----------|-----------|-----------|
| 58 | 30 | 0 | -3.232445 | -0.892352 | -0.829850 |
| 59 | 17 | 0 | -4.459109 | -0.088696 | 0.778802  |
| 60 | 17 | 0 | -3.368203 | -1.433771 | -2.915918 |

**trans-exo-TS1-VI**

Standard orientation:

Imaginary frequency: -216.7781 cm<sup>-1</sup>  
 Electronic energy  $E = -4189.676057$  a.u.  
 Enthalpy  $H = -4189.640699$  a.u.  
 Entropy  $S = 224.109$  cal/mol/K  
 Gibbs free energy  $G = -4189.747180$  a.u.  
 Total free energy in solution  $E_{\text{sol}} = -4190.85969$  a.u.

| Center Number | Atomic Number | Atomic Type | Coordinates (Angstroms) |           |           |
|---------------|---------------|-------------|-------------------------|-----------|-----------|
|               |               |             | X                       | Y         | Z         |
| 1             | 6             | 0           | -2.174091               | -1.658898 | -0.443902 |
| 2             | 7             | 0           | -0.096527               | -1.564143 | 0.661019  |
| 3             | 6             | 0           | -0.736436               | -1.811309 | -0.435367 |
| 4             | 6             | 0           | -0.008451               | -2.205733 | -1.687058 |
| 5             | 6             | 0           | -2.844304               | -0.958773 | 0.539048  |
| 6             | 6             | 0           | -0.856982               | -1.333447 | 1.897701  |
| 7             | 6             | 0           | -2.084230               | -0.438195 | 1.718120  |
| 8             | 1             | 0           | 0.260753                | -1.320715 | -2.268231 |
| 9             | 1             | 0           | -0.644328               | -2.839751 | -2.305653 |
| 10            | 1             | 0           | 0.897896                | -2.756460 | -1.449775 |
| 11            | 6             | 0           | -4.196024               | -0.836631 | 0.115924  |
| 12            | 6             | 0           | -4.289455               | -1.500871 | -1.129553 |
| 13            | 7             | 0           | -3.048213               | -1.981024 | -1.460291 |
| 14            | 1             | 0           | -2.832352               | -2.506272 | -2.288219 |
| 15            | 1             | 0           | -0.173506               | -0.921749 | 2.639671  |
| 16            | 1             | 0           | -1.182133               | -2.317648 | 2.248059  |
| 17            | 1             | 0           | -1.795176               | 0.609204  | 1.574698  |
| 18            | 1             | 0           | -2.680314               | -0.479705 | 2.631657  |
| 19            | 6             | 0           | -5.335457               | -0.229723 | 0.687428  |
| 20            | 6             | 0           | -6.526239               | -0.314839 | -0.003528 |
| 21            | 6             | 0           | -6.605252               | -0.994540 | -1.248093 |
| 22            | 6             | 0           | -5.507670               | -1.589756 | -1.820397 |
| 23            | 1             | 0           | -5.255910               | 0.283151  | 1.634924  |
| 24            | 1             | 0           | -5.584798               | -2.100298 | -2.771535 |
| 25            | 1             | 0           | -7.571389               | -1.023561 | -1.733549 |
| 26            | 8             | 0           | -7.705495               | 0.218737  | 0.413216  |
| 27            | 6             | 0           | -7.697500               | 0.910578  | 1.647727  |
| 28            | 1             | 0           | -7.405001               | 0.247282  | 2.466236  |
| 29            | 1             | 0           | -7.019015               | 1.766879  | 1.612178  |
| 30            | 1             | 0           | -8.714867               | 1.257468  | 1.805334  |
| 31            | 30            | 0           | 2.087044                | 2.618273  | 0.522902  |
| 32            | 17            | 0           | 0.759159                | 2.597457  | 2.285777  |
| 33            | 17            | 0           | 4.219383                | 2.952918  | 0.304684  |
| 34            | 6             | 0           | 3.160263                | -1.275454 | -1.152311 |
| 35            | 6             | 0           | 3.539134                | -2.509973 | -0.420127 |
| 36            | 6             | 0           | 2.185583                | -0.457629 | -0.465068 |
| 37            | 6             | 0           | 1.659034                | -0.862556 | 0.787484  |
| 38            | 6             | 0           | 3.077921                | -2.728726 | 0.876570  |
| 39            | 8             | 0           | 2.278390                | -1.814710 | 1.522730  |
| 40            | 8             | 0           | 3.615906                | -1.015565 | -2.261262 |
| 41            | 6             | 0           | 1.744956                | 0.749056  | -1.069996 |
| 42            | 6             | 0           | 0.557133                | 1.384310  | -0.792358 |
| 43            | 1             | 0           | 1.285125                | -0.075741 | 1.435843  |
| 44            | 1             | 0           | 2.407185                | 1.152135  | -1.833281 |
| 45            | 6             | 0           | 0.194444                | 2.684352  | -1.379655 |
| 46            | 8             | 0           | -0.855408               | 3.041360  | -1.833773 |
| 47            | 1             | 0           | -0.219645               | 0.910323  | -0.209525 |
| 48            | 8             | 0           | 1.277012                | 3.535756  | -1.260693 |
| 49            | 6             | 0           | 1.109598                | 4.874222  | -1.771414 |
| 50            | 1             | 0           | 0.885425                | 4.822668  | -2.833465 |



|    |   |   |          |           |           |
|----|---|---|----------|-----------|-----------|
| 51 | 1 | 0 | 0.297106 | 5.363494  | -1.240142 |
| 52 | 1 | 0 | 2.058956 | 5.367470  | -1.592071 |
| 53 | 6 | 0 | 4.375649 | -3.462240 | -1.007324 |
| 54 | 6 | 0 | 4.738518 | -4.602646 | -0.309704 |
| 55 | 6 | 0 | 4.269400 | -4.797172 | 0.993142  |
| 56 | 6 | 0 | 3.438866 | -3.862890 | 1.595364  |
| 57 | 1 | 0 | 4.727336 | -3.264098 | -2.011413 |
| 58 | 1 | 0 | 5.387700 | -5.337828 | -0.766325 |
| 59 | 1 | 0 | 4.555014 | -5.684635 | 1.543147  |
| 60 | 1 | 0 | 3.068914 | -3.987772 | 2.603784  |

**trans-exo-IM1-VI**

Standard orientation:

Imaginary frequency: -6.2506 cm<sup>-1</sup>

Electronic energy  $E = -4189.687058$  a.u.

Enthalpy  $H = -4189.652526$  a.u.

Entropy  $S = 214.926$  cal/mol/K

Gibbs free energy  $G = -4189.754645$  a.u.

Total free energy in solution  $E_{\text{sol}} = -4190.87369$  a.u.

| Center Number | Atomic Number | Atomic Type | Coordinates (Angstroms) |           |           |
|---------------|---------------|-------------|-------------------------|-----------|-----------|
|               |               |             | X                       | Y         | Z         |
| 1             | 6             | 0           | 1.453669                | -2.002606 | 0.473581  |
| 2             | 7             | 0           | -0.567582               | -1.274774 | -0.451915 |
| 3             | 6             | 0           | 0.043996                | -1.836272 | 0.567851  |
| 4             | 6             | 0           | -0.672035               | -2.192122 | 1.831975  |
| 5             | 6             | 0           | 2.230618                | -1.339767 | -0.468524 |
| 6             | 6             | 0           | 0.156680                | -1.038325 | -1.727268 |
| 7             | 6             | 0           | 1.572630                | -0.511851 | -1.517812 |
| 8             | 1             | 0           | -0.681246               | -1.310380 | 2.478277  |
| 9             | 1             | 0           | -0.144220               | -2.994221 | 2.345399  |
| 10            | 1             | 0           | -1.694652               | -2.497533 | 1.641309  |
| 11            | 6             | 0           | 3.583261                | -1.543810 | -0.113325 |
| 12            | 6             | 0           | 3.577672                | -2.359739 | 1.044699  |
| 13            | 7             | 0           | 2.282200                | -2.610872 | 1.399892  |
| 14            | 1             | 0           | 1.997605                | -3.196090 | 2.164618  |
| 15            | 1             | 0           | -0.431451               | -0.329096 | -2.304514 |
| 16            | 1             | 0           | 0.186110                | -2.000098 | -2.247934 |
| 17            | 1             | 0           | 1.582439                | 0.544631  | -1.228650 |
| 18            | 1             | 0           | 2.099328                | -0.577287 | -2.471395 |
| 19            | 6             | 0           | 4.800681                | -1.098887 | -0.678115 |
| 20            | 6             | 0           | 5.969393                | -1.501200 | -0.072366 |
| 21            | 6             | 0           | 5.947564                | -2.340054 | 1.079745  |
| 22            | 6             | 0           | 4.777738                | -2.775570 | 1.647146  |
| 23            | 1             | 0           | 4.789386                | -0.456530 | -1.546264 |
| 24            | 1             | 0           | 4.784620                | -3.403298 | 2.528262  |
| 25            | 1             | 0           | 6.905106                | -2.616922 | 1.500187  |
| 26            | 8             | 0           | 7.215637                | -1.162299 | -0.482439 |
| 27            | 6             | 0           | 7.311913                | -0.291625 | -1.597959 |
| 28            | 1             | 0           | 6.875449                | -0.750443 | -2.488710 |
| 29            | 1             | 0           | 6.814343                | 0.659077  | -1.392757 |
| 30            | 1             | 0           | 8.373118                | -0.124048 | -1.756354 |
| 31            | 30            | 0           | -0.311717               | 2.519064  | -0.664896 |
| 32            | 17            | 0           | 1.712765                | 3.310063  | -1.098409 |
| 33            | 17            | 0           | -1.804250               | 2.086341  | -2.242442 |
| 34            | 6             | 0           | -3.942548               | -0.053228 | 0.804661  |
| 35            | 6             | 0           | -4.685824               | -1.178811 | 0.168499  |
| 36            | 6             | 0           | -2.491085               | -0.060160 | 0.597650  |
| 37            | 6             | 0           | -2.014054               | -1.019744 | -0.457202 |
| 38            | 6             | 0           | -4.004231               | -2.264488 | -0.381146 |
| 39            | 8             | 0           | -2.628616               | -2.308627 | -0.401827 |
| 40            | 8             | 0           | -4.534070               | 0.781962  | 1.474826  |
| 41            | 6             | 0           | -1.783752               | 0.993131  | 1.106010  |
| 42            | 6             | 0           | -0.388644               | 1.311506  | 1.089614  |
| 43            | 1             | 0           | -2.234881               | -0.591849 | -1.438335 |
| 44            | 1             | 0           | -2.430789               | 1.720190  | 1.593501  |

|    |   |   |           |           |           |
|----|---|---|-----------|-----------|-----------|
| 45 | 6 | 0 | 0.028855  | 2.504313  | 1.838523  |
| 46 | 8 | 0 | 0.895747  | 2.633397  | 2.660964  |
| 47 | 1 | 0 | 0.361768  | 0.533704  | 1.099741  |
| 48 | 8 | 0 | -0.682406 | 3.593784  | 1.344511  |
| 49 | 6 | 0 | -0.281483 | 4.870237  | 1.871141  |
| 50 | 1 | 0 | -0.372434 | 4.863039  | 2.954566  |
| 51 | 1 | 0 | 0.748880  | 5.069301  | 1.583859  |
| 52 | 1 | 0 | -0.957663 | 5.594330  | 1.428097  |
| 53 | 6 | 0 | -6.081576 | -1.197217 | 0.186461  |
| 54 | 6 | 0 | -6.779029 | -2.275986 | -0.334398 |
| 55 | 6 | 0 | -6.076928 | -3.358815 | -0.868693 |
| 56 | 6 | 0 | -4.688463 | -3.360825 | -0.895161 |
| 57 | 1 | 0 | -6.584856 | -0.347768 | 0.629156  |
| 58 | 1 | 0 | -7.860751 | -2.282945 | -0.323129 |
| 59 | 1 | 0 | -6.615837 | -4.205883 | -1.274001 |
| 60 | 1 | 0 | -4.125398 | -4.185405 | -1.311243 |

**trans-exo-TS2-VI**

Standard orientation:

| Center Number | Atomic Number | Atomic Type | Coordinates (Angstroms) |           |           |
|---------------|---------------|-------------|-------------------------|-----------|-----------|
|               |               |             | X                       | Y         | Z         |
| 1             | 6             | 0           | 1.591440                | -1.315118 | 0.804841  |
| 2             | 7             | 0           | -0.488762               | -1.752715 | -0.221143 |
| 3             | 6             | 0           | 0.148501                | -1.269467 | 0.880020  |
| 4             | 6             | 0           | -0.507271               | -1.364238 | 2.228699  |
| 5             | 6             | 0           | 2.301195                | -1.552179 | -0.352448 |
| 6             | 6             | 0           | 0.256105                | -2.517947 | -1.237798 |
| 7             | 6             | 0           | 1.576776                | -1.858907 | -1.622991 |
| 8             | 1             | 0           | -0.055033               | -0.665131 | 2.929865  |
| 9             | 1             | 0           | -0.349616               | -2.386912 | 2.583765  |
| 10            | 1             | 0           | -1.577900               | -1.190224 | 2.174384  |
| 11            | 6             | 0           | 3.680164                | -1.404836 | -0.033131 |
| 12            | 6             | 0           | 3.735794                | -1.071984 | 1.339026  |
| 13            | 7             | 0           | 2.457619                | -1.060223 | 1.848804  |
| 14            | 1             | 0           | 2.195110                | -0.480801 | 2.630717  |
| 15            | 1             | 0           | -0.398682               | -2.633394 | -2.098904 |
| 16            | 1             | 0           | 0.457260                | -3.511027 | -0.827689 |
| 17            | 1             | 0           | 1.406649                | -0.940552 | -2.197745 |
| 18            | 1             | 0           | 2.143253                | -2.542525 | -2.258483 |
| 19            | 6             | 0           | 4.864609                | -1.524279 | -0.789586 |
| 20            | 6             | 0           | 6.063168                | -1.282775 | -0.149174 |
| 21            | 6             | 0           | 6.103211                | -0.935935 | 1.226521  |
| 22            | 6             | 0           | 4.958663                | -0.830386 | 1.980208  |
| 23            | 1             | 0           | 4.815004                | -1.781623 | -1.837668 |
| 24            | 1             | 0           | 5.004177                | -0.568803 | 3.029246  |
| 25            | 1             | 0           | 7.077081                | -0.757316 | 1.662068  |
| 26            | 8             | 0           | 7.285991                | -1.347197 | -0.741813 |
| 27            | 6             | 0           | 7.317690                | -1.656960 | -2.121666 |
| 28            | 1             | 0           | 6.892795                | -2.646419 | -2.311554 |
| 29            | 1             | 0           | 6.773382                | -0.908557 | -2.703683 |
| 30            | 1             | 0           | 8.365763                | -1.650288 | -2.407958 |
| 31            | 30            | 0           | -0.669058               | 2.922523  | -0.801274 |
| 32            | 17            | 0           | -2.615439               | 3.826732  | -1.035795 |
| 33            | 17            | 0           | 1.176068                | 2.816237  | -1.973491 |
| 34            | 6             | 0           | -3.899173               | -0.190452 | 0.364294  |
| 35            | 6             | 0           | -4.647208               | -1.432650 | 0.050049  |
| 36            | 6             | 0           | -2.445530               | -0.252700 | 0.132994  |
| 37            | 6             | 0           | -1.890937               | -1.506927 | -0.482232 |
| 38            | 6             | 0           | -3.956864               | -2.629124 | -0.146081 |

Imaginary frequency: -362.7156 cm<sup>-1</sup>  
 Electronic energy  $E = -4189.660681$  a.u.  
 Enthalpy  $H = -4189.626224$  a.u.  
 Entropy  $S = 218.978$  cal/mol/K  
 Gibbs free energy  $G = -4189.730267$  a.u.  
 Total free energy in solution  $E_{\text{sol}} = -4190.84290$  a.u.

|    |   |   |           |           |           |
|----|---|---|-----------|-----------|-----------|
| 39 | 8 | 0 | -2.590477 | -2.684096 | -0.058109 |
| 40 | 8 | 0 | -4.461659 | 0.805516  | 0.790223  |
| 41 | 6 | 0 | -1.686854 | 0.806713  | 0.522619  |
| 42 | 6 | 0 | -0.256571 | 0.899009  | 0.462855  |
| 43 | 1 | 0 | -1.985253 | -1.444712 | -1.571970 |
| 44 | 1 | 0 | -2.239151 | 1.575463  | 1.060529  |
| 45 | 6 | 0 | 0.411975  | 1.837211  | 1.388800  |
| 46 | 8 | 0 | 1.305252  | 1.618760  | 2.167048  |
| 47 | 1 | 0 | 0.351033  | 0.554851  | -0.354827 |
| 48 | 8 | 0 | -0.136823 | 3.093418  | 1.269851  |
| 49 | 6 | 0 | 0.412800  | 4.136873  | 2.105122  |
| 50 | 1 | 0 | 0.306372  | 3.848068  | 3.146992  |
| 51 | 1 | 0 | 1.461062  | 4.278891  | 1.855215  |
| 52 | 1 | 0 | -0.174515 | 5.020261  | 1.878910  |
| 53 | 6 | 0 | -6.042475 | -1.431495 | 0.010202  |
| 54 | 6 | 0 | -6.736348 | -2.607235 | -0.229503 |
| 55 | 6 | 0 | -6.030178 | -3.798173 | -0.417880 |
| 56 | 6 | 0 | -4.641996 | -3.817710 | -0.378755 |
| 57 | 1 | 0 | -6.548615 | -0.489949 | 0.178730  |
| 58 | 1 | 0 | -7.817502 | -2.605546 | -0.265642 |
| 59 | 1 | 0 | -6.567358 | -4.720328 | -0.600080 |
| 60 | 1 | 0 | -4.078663 | -4.730210 | -0.519416 |

**trans-exo-IM2-VI**

Standard orientation:

| Center Number | Atomic Number | Atomic Type | Coordinates (Angstroms) |           |           |
|---------------|---------------|-------------|-------------------------|-----------|-----------|
|               |               |             | X                       | Y         | Z         |
| 1             | 6             | 0           | 2.022689                | 0.481427  | -0.591946 |
| 2             | 7             | 0           | 0.083234                | 1.506798  | 0.353023  |
| 3             | 6             | 0           | 0.527672                | 0.611953  | -0.739475 |
| 4             | 6             | 0           | 0.169720                | 1.128344  | -2.141584 |
| 5             | 6             | 0           | 2.812136                | 1.139124  | 0.314398  |
| 6             | 6             | 0           | 0.944643                | 2.644478  | 0.685676  |
| 7             | 6             | 0           | 2.261080                | 2.147000  | 1.269406  |
| 8             | 1             | 0           | 0.571168                | 0.464627  | -2.907130 |
| 9             | 1             | 0           | 0.605900                | 2.118164  | -2.276810 |
| 10            | 1             | 0           | -0.908584               | 1.209138  | -2.273339 |
| 11            | 6             | 0           | 4.162216                | 0.723558  | 0.071424  |
| 12            | 6             | 0           | 4.118815                | -0.183816 | -1.005988 |
| 13            | 7             | 0           | 2.805708                | -0.311759 | -1.399497 |
| 14            | 1             | 0           | 2.455554                | -0.916317 | -2.122916 |
| 15            | 1             | 0           | 0.400234                | 3.257278  | 1.405710  |
| 16            | 1             | 0           | 1.137176                | 3.266481  | -0.195657 |
| 17            | 1             | 0           | 2.086435                | 1.714314  | 2.258504  |
| 18            | 1             | 0           | 2.951476                | 2.986139  | 1.389121  |
| 19            | 6             | 0           | 5.393015                | 1.052141  | 0.669584  |
| 20            | 6             | 0           | 6.537917                | 0.455939  | 0.171413  |
| 21            | 6             | 0           | 6.478006                | -0.455825 | -0.907451 |
| 22            | 6             | 0           | 5.280156                | -0.784516 | -1.504315 |
| 23            | 1             | 0           | 5.424139                | 1.747102  | 1.496716  |
| 24            | 1             | 0           | 5.246205                | -1.482309 | -2.331432 |
| 25            | 1             | 0           | 7.409703                | -0.886684 | -1.248339 |
| 26            | 8             | 0           | 7.796745                | 0.678540  | 0.652858  |
| 27            | 6             | 0           | 7.916248                | 1.566249  | 1.744415  |
| 28            | 1             | 0           | 7.560714                | 2.566552  | 1.480885  |
| 29            | 1             | 0           | 7.358430                | 1.202175  | 2.611981  |
| 30            | 1             | 0           | 8.975284                | 1.609662  | 1.985367  |
| 31            | 30            | 0           | -2.037292               | -2.769953 | 0.838359  |

Imaginary frequency: -470.2858 cm<sup>-1</sup>  
 Electronic energy  $E = -4189.712898$  a.u.  
 Enthalpy  $H = -4189.678682$  a.u.  
 Entropy  $S = 214.137$  cal/mol/K  
 Gibbs free energy  $G = -4189.780426$  a.u.  
 Total free energy in solution  $E_{\text{sol}} = -4190.89438$  a.u.

|    |    |   |           |           |           |
|----|----|---|-----------|-----------|-----------|
| 32 | 17 | 0 | -3.609003 | -3.908889 | -0.097184 |
| 33 | 17 | 0 | -1.048642 | -2.286935 | 2.686064  |
| 34 | 6  | 0 | -3.636950 | 0.881584  | 0.115339  |
| 35 | 6  | 0 | -4.001407 | 2.303355  | -0.005131 |
| 36 | 6  | 0 | -2.165861 | 0.626373  | 0.095722  |
| 37 | 6  | 0 | -1.291945 | 1.781531  | 0.471736  |
| 38 | 6  | 0 | -3.006138 | 3.254951  | -0.277959 |
| 39 | 8  | 0 | -1.691092 | 2.918046  | -0.370257 |
| 40 | 8  | 0 | -4.435871 | -0.031378 | 0.200617  |
| 41 | 6  | 0 | -1.667243 | -0.533861 | -0.318692 |
| 42 | 6  | 0 | -0.170102 | -0.734094 | -0.393071 |
| 43 | 1  | 0 | -1.508011 | 2.097270  | 1.498994  |
| 44 | 1  | 0 | -2.367484 | -1.246514 | -0.760512 |
| 45 | 6  | 0 | 0.089091  | -1.929022 | -1.272010 |
| 46 | 8  | 0 | 0.719329  | -2.021332 | -2.289947 |
| 47 | 1  | 0 | 0.195812  | -1.006716 | 0.605277  |
| 48 | 8  | 0 | -0.557073 | -3.010475 | -0.737082 |
| 49 | 6  | 0 | -0.445506 | -4.251666 | -1.490069 |
| 50 | 1  | 0 | -0.880298 | -4.106510 | -2.474250 |
| 51 | 1  | 0 | 0.604737  | -4.516015 | -1.565239 |
| 52 | 1  | 0 | -1.010649 | -4.982202 | -0.923763 |
| 53 | 6  | 0 | -5.342658 | 2.697132  | 0.065081  |
| 54 | 6  | 0 | -5.691691 | 4.020308  | -0.132071 |
| 55 | 6  | 0 | -4.692423 | 4.958752  | -0.415939 |
| 56 | 6  | 0 | -3.358278 | 4.588112  | -0.487581 |
| 57 | 1  | 0 | -6.082913 | 1.933730  | 0.267383  |
| 58 | 1  | 0 | -6.726680 | 4.328699  | -0.074689 |
| 59 | 1  | 0 | -4.960984 | 5.995103  | -0.577792 |
| 60 | 1  | 0 | -2.576737 | 5.304890  | -0.699487 |

**trans-COM-VII**

Standard orientation:

Imaginary frequency: none

Electronic energy  $E = -3501.484056$  a.u.

Enthalpy  $H = -3501.463069$  a.u.

Entropy  $S = 159.063$  cal/mol/K

Gibbs free energy  $G = -3501.538645$  a.u.

Total free energy in solution  $E_{\text{sol}} = -3502.22527$  a.u.

| Center Number | Atomic Number | Atomic Type | Coordinates (Angstroms) |           |           |
|---------------|---------------|-------------|-------------------------|-----------|-----------|
|               |               |             | X                       | Y         | Z         |
| 1             | 6             | 0           | 3.482291                | 0.930765  | -0.192105 |
| 2             | 6             | 0           | 4.853292                | 0.406925  | -0.054685 |
| 3             | 6             | 0           | 2.425996                | -0.087555 | -0.038537 |
| 4             | 6             | 0           | 2.772483                | -1.380416 | 0.167461  |
| 5             | 6             | 0           | 5.069011                | -0.949223 | 0.177138  |
| 6             | 8             | 0           | 4.022519                | -1.833996 | 0.277828  |
| 7             | 8             | 0           | 3.238751                | 2.105088  | -0.413867 |
| 8             | 6             | 0           | 1.046059                | 0.360999  | -0.154654 |
| 9             | 6             | 0           | -0.056904               | -0.346064 | 0.139107  |
| 10            | 1             | 0           | 2.059326                | -2.188738 | 0.250953  |
| 11            | 1             | 0           | 0.945379                | 1.382297  | -0.503382 |
| 12            | 6             | 0           | -1.395760               | 0.203739  | -0.035269 |
| 13            | 8             | 0           | -2.398721               | -0.461998 | 0.248362  |
| 14            | 1             | 0           | -0.045883               | -1.353932 | 0.530511  |
| 15            | 8             | 0           | -1.456604               | 1.432780  | -0.502048 |
| 16            | 6             | 0           | -2.762842               | 2.015884  | -0.676081 |
| 17            | 1             | 0           | -3.324213               | 1.448188  | -1.419112 |
| 18            | 1             | 0           | -3.282999               | 2.055624  | 0.281289  |
| 19            | 1             | 0           | -2.577839               | 3.019880  | -1.040874 |
| 20            | 30            | 0           | -4.373199               | -0.387521 | 0.144678  |
| 21            | 17            | 0           | -4.999854               | -0.989535 | -1.833112 |
| 22            | 17            | 0           | -5.181299               | 0.445027  | 1.964415  |
| 23            | 6             | 0           | 5.960393                | 1.257472  | -0.154497 |
| 24            | 6             | 0           | 7.240109                | 0.751482  | -0.022201 |
| 25            | 6             | 0           | 7.430201                | -0.617165 | 0.211200  |

|    |   |   |          |           |           |
|----|---|---|----------|-----------|-----------|
| 26 | 6 | 0 | 6.349646 | -1.477465 | 0.312149  |
| 27 | 1 | 0 | 5.771916 | 2.307366  | -0.335029 |
| 28 | 1 | 0 | 8.095626 | 1.408949  | -0.097860 |
| 29 | 1 | 0 | 8.432589 | -1.011570 | 0.314227  |
| 30 | 1 | 0 | 6.470241 | -2.537057 | 0.490420  |

**trans-endo-TS1-VII**

Standard orientation:

Center Atomic Atomic Coordinates (Angstroms)  
Number Number Type X Y Z

|    |   |   |           |           |           |
|----|---|---|-----------|-----------|-----------|
| 1  | 6 | 0 | -0.463246 | 0.133122  | -1.210792 |
| 2  | 7 | 0 | 1.878033  | -0.233829 | -1.317752 |
| 3  | 6 | 0 | 0.681104  | -0.719291 | -1.471136 |
| 4  | 6 | 0 | 0.464199  | -2.080246 | -2.065617 |
| 5  | 6 | 0 | -0.357837 | 1.363497  | -0.630137 |
| 6  | 6 | 0 | 2.036651  | 1.210754  | -1.078830 |
| 7  | 6 | 0 | 0.980482  | 1.852077  | -0.175970 |
| 8  | 1 | 0 | -0.298405 | -2.655132 | -1.540726 |
| 9  | 1 | 0 | 1.389911  | -2.646044 | -2.138662 |
| 10 | 1 | 0 | 0.097208  | -1.937880 | -3.087249 |
| 11 | 6 | 0 | -1.673217 | 1.932602  | -0.569034 |
| 12 | 6 | 0 | -2.542936 | 0.993437  | -1.142790 |
| 13 | 7 | 0 | -1.823103 | -0.187848 | -1.434082 |
| 14 | 1 | 0 | -2.078483 | -0.725323 | -2.260145 |
| 15 | 1 | 0 | 1.984093  | 1.675029  | -2.068243 |
| 16 | 1 | 0 | 3.036927  | 1.378614  | -0.687935 |
| 17 | 1 | 0 | 1.057400  | 2.937625  | -0.261999 |
| 18 | 1 | 0 | 1.142622  | 1.594700  | 0.875028  |
| 19 | 6 | 0 | -2.152255 | 3.175054  | -0.119352 |
| 20 | 6 | 0 | -3.498773 | 3.442661  | -0.301224 |
| 21 | 6 | 0 | -4.354885 | 2.496916  | -0.912738 |
| 22 | 6 | 0 | -3.897916 | 1.266208  | -1.330215 |
| 23 | 1 | 0 | -4.571551 | 0.536911  | -1.759948 |
| 24 | 1 | 0 | -1.479368 | 3.885687  | 0.337683  |
| 25 | 1 | 0 | -5.396218 | 2.766696  | -1.021256 |
| 26 | 8 | 0 | -4.108426 | 4.597172  | 0.068796  |
| 27 | 6 | 0 | -3.313615 | 5.568221  | 0.723316  |
| 28 | 1 | 0 | -3.979402 | 6.394760  | 0.954761  |
| 29 | 1 | 0 | -2.507710 | 5.919055  | 0.073071  |
| 30 | 1 | 0 | -2.890241 | 5.167730  | 1.647902  |
| 31 | 6 | 0 | 4.025419  | 0.122788  | 1.450289  |
| 32 | 6 | 0 | 5.176457  | 0.421299  | 0.561739  |
| 33 | 6 | 0 | 3.066752  | -0.819986 | 0.902954  |
| 34 | 6 | 0 | 3.175155  | -1.251139 | -0.451517 |
| 35 | 6 | 0 | 5.265510  | -0.170700 | -0.695867 |
| 36 | 8 | 0 | 4.315130  | -1.054244 | -1.156681 |
| 37 | 8 | 0 | 3.917883  | 0.643798  | 2.556049  |
| 38 | 6 | 0 | 1.896774  | -1.103195 | 1.643671  |
| 39 | 6 | 0 | 0.852667  | -1.867606 | 1.207959  |
| 40 | 1 | 0 | 2.745272  | -2.202381 | -0.727005 |
| 41 | 1 | 0 | 1.815252  | -0.582900 | 2.592429  |
| 42 | 6 | 0 | -0.443746 | -1.864542 | 1.819588  |
| 43 | 8 | 0 | -1.451958 | -2.302773 | 1.222325  |
| 44 | 1 | 0 | 0.899913  | -2.458871 | 0.308938  |
| 45 | 8 | 0 | -0.536001 | -1.363086 | 3.034861  |
| 46 | 6 | 0 | -1.859440 | -1.307875 | 3.613057  |
| 47 | 1 | 0 | -2.508019 | -0.675652 | 3.012077  |
| 48 | 1 | 0 | -2.279499 | -2.309514 | 3.662685  |
| 49 | 1 | 0 | -1.711488 | -0.896098 | 4.605499  |

Imaginary frequency: -276.3986 cm<sup>-1</sup>  
 Electronic energy  $E = -4189.698022$  a.u.  
 Enthalpy  $H = -4189.663701$  a.u.  
 Entropy  $S = 213.858$  cal/mol/K  
 Gibbs free energy  $G = -4189.765312$  a.u.  
 Total free energy in solution  $E_{\text{sol}} = -4190.87594$  a.u.

|    |    |   |           |           |           |
|----|----|---|-----------|-----------|-----------|
| 50 | 30 | 0 | -2.817452 | -1.774615 | -0.087065 |
| 51 | 17 | 0 | -2.996617 | -3.087028 | -1.881323 |
| 52 | 17 | 0 | -4.481993 | -0.916941 | 1.073665  |
| 53 | 6  | 0 | 6.186573  | 1.296886  | 0.966762  |
| 54 | 6  | 0 | 7.259827  | 1.564815  | 0.132560  |
| 55 | 6  | 0 | 7.329797  | 0.955245  | -1.123617 |
| 56 | 6  | 0 | 6.334560  | 0.085363  | -1.546797 |
| 57 | 1  | 0 | 6.093313  | 1.743227  | 1.948129  |
| 58 | 1  | 0 | 8.042149  | 2.240740  | 0.450804  |
| 59 | 1  | 0 | 8.167241  | 1.160468  | -1.778034 |
| 60 | 1  | 0 | 6.367105  | -0.398923 | -2.513209 |

**trans-endo-IM1-VII**

Standard orientation:

Imaginary frequency: none

Electronic energy  $E = -4189.703107$  a.u.

Enthalpy  $H = -4189.668615$  a.u.

Entropy  $S = 213.509$  cal/mol/K

Gibbs free energy  $G = -4189.770060$  a.u.

Total free energy in solution  $E_{\text{sol}} = -4190.88490$  a.u.

| Center Number | Atomic Number | Atomic Type | Coordinates (Angstroms) |           |           |
|---------------|---------------|-------------|-------------------------|-----------|-----------|
|               |               |             | X                       | Y         | Z         |
| 1             | 6             | 0           | -0.445576               | 0.261332  | -1.178862 |
| 2             | 7             | 0           | 1.879029                | -0.107298 | -1.155968 |
| 3             | 6             | 0           | 0.682001                | -0.585977 | -1.434384 |
| 4             | 6             | 0           | 0.457231                | -1.859479 | -2.194730 |
| 5             | 6             | 0           | -0.372701               | 1.446134  | -0.488382 |
| 6             | 6             | 0           | 2.036293                | 1.330199  | -0.840717 |
| 7             | 6             | 0           | 0.943195                | 1.885825  | 0.068136  |
| 8             | 1             | 0           | -0.401163               | -2.410386 | -1.810685 |
| 9             | 1             | 0           | 1.324862                | -2.510262 | -2.235456 |
| 10            | 1             | 0           | 0.221327                | -1.570220 | -3.224418 |
| 11            | 6             | 0           | -1.689820               | 1.989654  | -0.424169 |
| 12            | 6             | 0           | -2.529554               | 1.083224  | -1.096789 |
| 13            | 7             | 0           | -1.786795               | -0.044349 | -1.466110 |
| 14            | 1             | 0           | -2.050984               | -0.588048 | -2.284150 |
| 15            | 1             | 0           | 2.005148                | 1.851260  | -1.800885 |
| 16            | 1             | 0           | 3.021635                | 1.467761  | -0.406889 |
| 17            | 1             | 0           | 1.028009                | 2.973616  | 0.087192  |
| 18            | 1             | 0           | 1.057204                | 1.523604  | 1.094135  |
| 19            | 6             | 0           | -2.206879               | 3.185544  | 0.112688  |
| 20            | 6             | 0           | -3.550428               | 3.441099  | -0.083823 |
| 21            | 6             | 0           | -4.374879               | 2.528741  | -0.791198 |
| 22            | 6             | 0           | -3.887550               | 1.346682  | -1.295389 |
| 23            | 1             | 0           | -4.534508               | 0.639065  | -1.796493 |
| 24            | 1             | 0           | -1.561282               | 3.868446  | 0.644849  |
| 25            | 1             | 0           | -5.418508               | 2.789332  | -0.901039 |
| 26            | 8             | 0           | -4.196142               | 4.549283  | 0.355880  |
| 27            | 6             | 0           | -3.440858               | 5.486513  | 1.101272  |
| 28            | 1             | 0           | -4.131465               | 6.279221  | 1.374291  |
| 29            | 1             | 0           | -2.627131               | 5.900566  | 0.499699  |
| 30            | 1             | 0           | -3.032401               | 5.027300  | 2.004963  |
| 31            | 6             | 0           | 4.108090                | -0.169367 | 1.438221  |
| 32            | 6             | 0           | 5.190970                | 0.335645  | 0.552990  |
| 33            | 6             | 0           | 3.066270                | -0.924388 | 0.769548  |
| 34            | 6             | 0           | 3.020716                | -1.013058 | -0.716782 |
| 35            | 6             | 0           | 5.171292                | 0.071445  | -0.815878 |
| 36            | 8             | 0           | 4.171059                | -0.646364 | -1.424606 |
| 37            | 8             | 0           | 4.127108                | 0.049657  | 2.645793  |
| 38            | 6             | 0           | 1.969632                | -1.358412 | 1.501355  |
| 39            | 6             | 0           | 0.878820                | -2.038854 | 0.976947  |
| 40            | 1             | 0           | 2.755239                | -2.004656 | -1.066739 |
| 41            | 1             | 0           | 1.952987                | -1.056806 | 2.544046  |
| 42            | 6             | 0           | -0.382311               | -2.128090 | 1.611946  |
| 43            | 8             | 0           | -1.412949               | -2.536125 | 1.004569  |

|    |    |   |           |           |           |
|----|----|---|-----------|-----------|-----------|
| 44 | 1  | 0 | 0.914081  | -2.525094 | 0.018414  |
| 45 | 8  | 0 | -0.455918 | -1.749462 | 2.879168  |
| 46 | 6  | 0 | -1.749710 | -1.818993 | 3.510139  |
| 47 | 1  | 0 | -2.443414 | -1.129713 | 3.035036  |
| 48 | 1  | 0 | -2.141373 | -2.831363 | 3.442136  |
| 49 | 1  | 0 | -1.569970 | -1.542711 | 4.544065  |
| 50 | 30 | 0 | -2.799651 | -1.799276 | -0.131586 |
| 51 | 17 | 0 | -3.075188 | -2.828449 | -2.093406 |
| 52 | 17 | 0 | -4.366879 | -0.872191 | 1.099851  |
| 53 | 6  | 0 | 6.251987  | 1.071255  | 1.085322  |
| 54 | 6  | 0 | 7.274288  | 1.530164  | 0.269949  |
| 55 | 6  | 0 | 7.239171  | 1.249888  | -1.098135 |
| 56 | 6  | 0 | 6.191961  | 0.522669  | -1.647470 |
| 57 | 1  | 0 | 6.239386  | 1.256355  | 2.151480  |
| 58 | 1  | 0 | 8.095006  | 2.097082  | 0.688537  |
| 59 | 1  | 0 | 8.034723  | 1.600489  | -1.743227 |
| 60 | 1  | 0 | 6.146444  | 0.293577  | -2.703569 |

### trans-endo-TS2-VII

Standard orientation:

Imaginary frequency: -190.4885 cm<sup>-1</sup>

Electronic energy  $E = -4189.700414$  a.u.

Enthalpy  $H = -4189.667095$  a.u.

Entropy  $S = 206.109$  cal/mol/K

Gibbs free energy  $G = -4189.765024$  a.u.

Total free energy in solution  $E_{\text{sol}} = -4190.87905$  a.u.

| Center Number | Atomic Number | Atomic Type | Coordinates (Angstroms) |           |           |
|---------------|---------------|-------------|-------------------------|-----------|-----------|
|               |               |             | X                       | Y         | Z         |
| 1             | 6             | 0           | -0.547729               | 0.422430  | -0.723666 |
| 2             | 7             | 0           | 1.807515                | 0.291472  | -0.945213 |
| 3             | 6             | 0           | 0.621297                | -0.279791 | -1.215646 |
| 4             | 6             | 0           | 0.389373                | -1.090275 | -2.469148 |
| 5             | 6             | 0           | -0.506717               | 1.672137  | -0.181984 |
| 6             | 1             | 0           | -0.467025               | -1.754532 | -2.343955 |
| 7             | 1             | 0           | 1.238948                | -1.688341 | -2.783193 |
| 8             | 1             | 0           | 0.162212                | -0.386944 | -3.275769 |
| 9             | 6             | 0           | -1.859730               | 2.148762  | -0.073976 |
| 10            | 6             | 0           | -2.680043               | 1.137414  | -0.586599 |
| 11            | 7             | 0           | -1.888679               | 0.017371  | -0.957860 |
| 12            | 1             | 0           | -2.090546               | -0.348299 | -1.891845 |
| 13            | 6             | 0           | -2.406098               | 3.357286  | 0.384089  |
| 14            | 6             | 0           | -3.780905               | 3.510426  | 0.289241  |
| 15            | 6             | 0           | -4.593697               | 2.484431  | -0.243567 |
| 16            | 6             | 0           | -4.062196               | 1.288117  | -0.678307 |
| 17            | 1             | 0           | -4.695597               | 0.499650  | -1.062438 |
| 18            | 1             | 0           | -1.767167               | 4.128027  | 0.789495  |
| 19            | 1             | 0           | -5.658871               | 2.665404  | -0.285150 |
| 20            | 8             | 0           | -4.456652               | 4.619098  | 0.682738  |
| 21            | 6             | 0           | -3.699249               | 5.683209  | 1.227649  |
| 22            | 1             | 0           | -4.413549               | 6.462438  | 1.477901  |
| 23            | 1             | 0           | -2.980101               | 6.065809  | 0.498552  |
| 24            | 1             | 0           | -3.171948               | 5.366129  | 2.131111  |
| 25            | 6             | 0           | 4.413994                | -0.799287 | 1.088638  |
| 26            | 6             | 0           | 5.357218                | 0.151762  | 0.458531  |
| 27            | 6             | 0           | 3.264056                | -1.184756 | 0.265051  |
| 28            | 6             | 0           | 3.034523                | -0.564714 | -1.076013 |
| 29            | 6             | 0           | 5.138671                | 0.607832  | -0.841221 |
| 30            | 8             | 0           | 4.070189                | 0.222984  | -1.605534 |
| 31            | 8             | 0           | 4.588679                | -1.221922 | 2.222486  |
| 32            | 6             | 0           | 2.222482                | -1.839834 | 0.863373  |
| 33            | 6             | 0           | 1.011396                | -2.178625 | 0.212115  |

|    |    |   |           |           |           |
|----|----|---|-----------|-----------|-----------|
| 34 | 1  | 0 | 2.806845  | -1.302070 | -1.837742 |
| 35 | 1  | 0 | 2.310077  | -2.000080 | 1.933560  |
| 36 | 6  | 0 | -0.170566 | -2.459199 | 0.964016  |
| 37 | 8  | 0 | -1.241287 | -2.842321 | 0.434970  |
| 38 | 1  | 0 | 1.013424  | -2.597739 | -0.780455 |
| 39 | 8  | 0 | -0.089164 | -2.262390 | 2.270086  |
| 40 | 6  | 0 | -1.259426 | -2.572620 | 3.056637  |
| 41 | 1  | 0 | -2.069537 | -1.887987 | 2.818550  |
| 42 | 1  | 0 | -1.576384 | -3.593947 | 2.858841  |
| 43 | 1  | 0 | -0.939469 | -2.457173 | 4.086816  |
| 44 | 30 | 0 | -2.816863 | -1.907934 | -0.239819 |
| 45 | 6  | 0 | 6.482617  | 0.596612  | 1.157695  |
| 46 | 6  | 0 | 7.375817  | 1.476890  | 0.570897  |
| 47 | 6  | 0 | 7.144337  | 1.918495  | -0.734895 |
| 48 | 6  | 0 | 6.032195  | 1.489729  | -1.444915 |
| 49 | 1  | 0 | 6.622643  | 0.221154  | 2.162914  |
| 50 | 1  | 0 | 8.246684  | 1.817233  | 1.114675  |
| 51 | 1  | 0 | 7.838823  | 2.603680  | -1.204373 |
| 52 | 1  | 0 | 5.837321  | 1.818589  | -2.456620 |
| 53 | 6  | 0 | 1.850513  | 1.227195  | 0.197761  |
| 54 | 1  | 0 | 2.860373  | 1.630755  | 0.247209  |
| 55 | 6  | 0 | 0.809878  | 2.330070  | 0.056124  |
| 56 | 1  | 0 | 1.641626  | 0.672420  | 1.117075  |
| 57 | 1  | 0 | 0.805911  | 2.928975  | 0.968683  |
| 58 | 1  | 0 | 1.048224  | 2.997072  | -0.778364 |
| 59 | 17 | 0 | -4.304673 | -1.493328 | 1.325008  |
| 60 | 17 | 0 | -3.224449 | -2.395487 | -2.393163 |

-----

**trans-endo-IM2-VII**

Standard orientation:

| Center Number | Atomic Number | Atomic Type | Coordinates (Angstroms) |           |           |
|---------------|---------------|-------------|-------------------------|-----------|-----------|
|               |               |             | X                       | Y         | Z         |
| 1             | 6             | 0           | -0.352138               | 0.037172  | -1.208882 |
| 2             | 7             | 0           | 2.019802                | 0.271464  | -1.271873 |
| 3             | 6             | 0           | 0.945747                | -0.712511 | -1.127811 |
| 4             | 6             | 0           | 1.030101                | -1.767810 | -2.235357 |
| 5             | 6             | 0           | -0.577319               | 1.183408  | -0.493665 |
| 6             | 6             | 0           | 1.820726                | 1.647127  | -0.742777 |
| 7             | 6             | 0           | 0.588066                | 1.865874  | 0.147186  |
| 8             | 1             | 0           | 0.194480                | -2.467151 | -2.151298 |
| 9             | 1             | 0           | 1.941975                | -2.359905 | -2.161340 |
| 10            | 1             | 0           | 1.005935                | -1.277250 | -3.207840 |
| 11            | 6             | 0           | -1.983073               | 1.438473  | -0.555398 |
| 12            | 6             | 0           | -2.545181               | 0.396693  | -1.339348 |
| 13            | 7             | 0           | -1.506675               | -0.418662 | -1.770623 |
| 14            | 1             | 0           | -1.655800               | -1.320423 | -2.201381 |
| 15            | 1             | 0           | 1.739673                | 2.311735  | -1.604114 |
| 16            | 1             | 0           | 2.715389                | 1.935509  | -0.193248 |
| 17            | 1             | 0           | 0.419632                | 2.941791  | 0.233200  |
| 18            | 1             | 0           | 0.773588                | 1.486627  | 1.155336  |
| 19            | 6             | 0           | -2.811146               | 2.453572  | -0.042283 |
| 20            | 6             | 0           | -4.160322               | 2.417630  | -0.353175 |
| 21            | 6             | 0           | -4.696261               | 1.412403  | -1.193837 |
| 22            | 6             | 0           | -3.906429               | 0.414053  | -1.715807 |
| 23            | 1             | 0           | -4.316504               | -0.344691 | -2.368980 |
| 24            | 1             | 0           | -2.388319               | 3.237382  | 0.569412  |
| 25            | 1             | 0           | -5.755809               | 1.449594  | -1.403951 |
| 26            | 8             | 0           | -5.069840               | 3.320241  | 0.085808  |
| 27            | 6             | 0           | -4.626600               | 4.292180  | 1.014240  |

Imaginary frequency: none  
 Electronic energy  $E = -4189.720695$  a.u.  
 Enthalpy  $H = -4189.687209$  a.u.  
 Entropy  $S = 205.667$  cal/mol/K  
 Gibbs free energy  $G = -4190.89627$  a.u.  
 Total free energy in solution  $E_{\text{sol}} = -4190.85265$  a.u.



|    |    |   |           |           |           |
|----|----|---|-----------|-----------|-----------|
| 28 | 1  | 0 | -5.505988 | 4.868089  | 1.287753  |
| 29 | 1  | 0 | -3.881502 | 4.954657  | 0.565487  |
| 30 | 1  | 0 | -4.207397 | 3.814382  | 1.903197  |
| 31 | 6  | 0 | 4.612758  | -0.609458 | 1.301935  |
| 32 | 6  | 0 | 5.729502  | 0.014562  | 0.570228  |
| 33 | 6  | 0 | 3.347610  | -0.701089 | 0.524651  |
| 34 | 6  | 0 | 3.307722  | -0.291288 | -0.926199 |
| 35 | 6  | 0 | 5.512543  | 0.613137  | -0.677099 |
| 36 | 8  | 0 | 4.295639  | 0.667788  | -1.286466 |
| 37 | 8  | 0 | 4.708162  | -1.020067 | 2.444157  |
| 38 | 6  | 0 | 2.252654  | -1.228471 | 1.073490  |
| 39 | 6  | 0 | 0.988330  | -1.469975 | 0.299601  |
| 40 | 1  | 0 | 3.481282  | -1.169026 | -1.555079 |
| 41 | 1  | 0 | 2.296714  | -1.547968 | 2.108528  |
| 42 | 6  | 0 | -0.256883 | -1.203903 | 1.122376  |
| 43 | 8  | 0 | -1.354486 | -1.657905 | 0.808857  |
| 44 | 1  | 0 | 0.925484  | -2.541466 | 0.079256  |
| 45 | 8  | 0 | -0.056703 | -0.501852 | 2.210773  |
| 46 | 6  | 0 | -1.232434 | -0.172739 | 2.993805  |
| 47 | 1  | 0 | -1.868914 | 0.494785  | 2.417672  |
| 48 | 1  | 0 | -1.782960 | -1.077629 | 3.234088  |
| 49 | 1  | 0 | -0.847525 | 0.311652  | 3.884080  |
| 50 | 30 | 0 | -3.261165 | -1.356075 | 0.137438  |
| 51 | 17 | 0 | -3.462646 | -2.969603 | -1.378917 |
| 52 | 17 | 0 | -4.482984 | -0.653547 | 1.813811  |
| 53 | 6  | 0 | 7.008431  | 0.047886  | 1.137894  |
| 54 | 6  | 0 | 8.056956  | 0.661317  | 0.477954  |
| 55 | 6  | 0 | 7.824719  | 1.260279  | -0.765276 |
| 56 | 6  | 0 | 6.565637  | 1.240303  | -1.343828 |
| 57 | 1  | 0 | 7.136803  | -0.418393 | 2.106090  |
| 58 | 1  | 0 | 9.045048  | 0.682024  | 0.917052  |
| 59 | 1  | 0 | 8.638441  | 1.745417  | -1.289468 |
| 60 | 1  | 0 | 6.370592  | 1.697869  | -2.304040 |

### trans-exo-TS1-VII

Standard orientation:

| Center Number | Atomic Number | Atomic Type | Coordinates (Angstroms) |           |           |
|---------------|---------------|-------------|-------------------------|-----------|-----------|
|               |               |             | X                       | Y         | Z         |
| 1             | 6             | 0           | -0.198935               | -1.223246 | 1.472462  |
| 2             | 7             | 0           | -2.131501               | -1.431303 | 0.134088  |
| 3             | 6             | 0           | -1.579014               | -0.914125 | 1.193707  |
| 4             | 6             | 0           | -2.336029               | 0.010019  | 2.097148  |
| 5             | 6             | 0           | 0.635310                | -1.741984 | 0.497160  |
| 6             | 6             | 0           | -1.438181               | -2.551353 | -0.519531 |
| 7             | 6             | 0           | 0.057946                | -2.318725 | -0.754430 |
| 8             | 1             | 0           | -1.988554               | 1.039585  | 1.996571  |
| 9             | 1             | 0           | -2.170203               | -0.317250 | 3.127818  |
| 10            | 1             | 0           | -3.402137               | -0.032985 | 1.896151  |
| 11            | 6             | 0           | 1.965537                | -1.464897 | 0.907912  |
| 12            | 6             | 0           | 1.879612                | -0.823217 | 2.164052  |
| 13            | 7             | 0           | 0.558042                | -0.681820 | 2.489260  |
| 14            | 1             | 0           | 0.206483                | -0.208406 | 3.302553  |
| 15            | 1             | 0           | -1.965548               | -2.763291 | -1.449060 |
| 16            | 1             | 0           | -1.565673               | -3.412760 | 0.140561  |
| 17            | 1             | 0           | 0.263755                | -1.665757 | -1.606695 |
| 18            | 1             | 0           | 0.518228                | -3.280070 | -0.994438 |
| 19            | 6             | 0           | 3.234013                | -1.667262 | 0.292120  |
| 20            | 6             | 0           | 4.364312                | -1.286698 | 1.005436  |
| 21            | 6             | 0           | 4.250061                | -0.655377 | 2.278474  |

Imaginary frequency: -285.3974 cm<sup>-1</sup>

Electronic energy  $E = -4189.700880$  a.u.

Enthalpy  $H = -4189.667007$  a.u.

Entropy  $S = 210.512$  cal/mol/K

Gibbs free energy  $G = -4189.767028$  a.u.

Total free energy in solution  $E_{\text{sol}} = -4190.88069$  a.u.

|    |    |   |           |           |           |
|----|----|---|-----------|-----------|-----------|
| 22 | 6  | 0 | 3.033053  | -0.426354 | 2.864495  |
| 23 | 1  | 0 | 3.302443  | -2.212076 | -0.638673 |
| 24 | 1  | 0 | 2.966603  | 0.067370  | 3.825281  |
| 25 | 1  | 0 | 5.170707  | -0.347674 | 2.753621  |
| 26 | 8  | 0 | 5.623672  | -1.462397 | 0.586398  |
| 27 | 6  | 0 | 5.817907  | -1.924719 | -0.745919 |
| 28 | 1  | 0 | 5.440508  | -2.943527 | -0.860340 |
| 29 | 1  | 0 | 5.329234  | -1.254768 | -1.455975 |
| 30 | 1  | 0 | 6.890678  | -1.907452 | -0.908736 |
| 31 | 30 | 0 | 3.024621  | 0.467503  | -0.854699 |
| 32 | 17 | 0 | 2.303840  | -0.470983 | -2.744869 |
| 33 | 17 | 0 | 4.901771  | 1.595760  | -0.569875 |
| 34 | 6  | 0 | -4.335744 | 1.457308  | -0.107789 |
| 35 | 6  | 0 | -5.450231 | 0.471984  | -0.097162 |
| 36 | 6  | 0 | -3.090152 | 0.945402  | -0.634890 |
| 37 | 6  | 0 | -3.002337 | -0.427533 | -1.048087 |
| 38 | 6  | 0 | -5.299427 | -0.776312 | -0.697090 |
| 39 | 8  | 0 | -4.133333 | -1.132804 | -1.333569 |
| 40 | 8  | 0 | -4.487287 | 2.588352  | 0.346989  |
| 41 | 6  | 0 | -1.925923 | 1.725211  | -0.496605 |
| 42 | 6  | 0 | -0.629081 | 1.305716  | -0.654110 |
| 43 | 1  | 0 | -2.267694 | -0.631838 | -1.822386 |
| 44 | 1  | 0 | -2.102735 | 2.728492  | -0.121650 |
| 45 | 6  | 0 | 0.488915  | 2.078344  | -0.209254 |
| 46 | 8  | 0 | 1.646715  | 1.626292  | -0.073907 |
| 47 | 1  | 0 | -0.364747 | 0.326563  | -1.021622 |
| 48 | 8  | 0 | 0.247410  | 3.336325  | 0.140989  |
| 49 | 6  | 0 | 1.382165  | 4.092661  | 0.599714  |
| 50 | 1  | 0 | 1.779525  | 3.655099  | 1.513275  |
| 51 | 1  | 0 | 2.160855  | 4.100177  | -0.159619 |
| 52 | 1  | 0 | 0.999720  | 5.091822  | 0.780497  |
| 53 | 6  | 0 | -6.672310 | 0.786644  | 0.501671  |
| 54 | 6  | 0 | -7.713957 | -0.127156 | 0.496946  |
| 55 | 6  | 0 | -7.541764 | -1.370568 | -0.118197 |
| 56 | 6  | 0 | -6.335666 | -1.702999 | -0.719261 |
| 57 | 1  | 0 | -6.766068 | 1.765481  | 0.953552  |
| 58 | 1  | 0 | -8.659138 | 0.120922  | 0.961140  |
| 59 | 1  | 0 | -8.354181 | -2.085902 | -0.128252 |
| 60 | 1  | 0 | -6.179761 | -2.656915 | -1.204452 |

**trans-exo-IM1-VII**

Standard orientation:

| Center Number | Atomic Number | Atomic Type | Coordinates (Angstroms) |           |           |
|---------------|---------------|-------------|-------------------------|-----------|-----------|
|               |               |             | X                       | Y         | Z         |
| 1             | 6             | 0           | 0.311287                | -2.227989 | 0.204481  |
| 2             | 7             | 0           | -1.244563               | -0.784099 | -0.791395 |
| 3             | 6             | 0           | -0.983493               | -1.629495 | 0.181652  |
| 4             | 6             | 0           | -1.955084               | -1.948365 | 1.274797  |
| 5             | 6             | 0           | 1.382421                | -1.702821 | -0.505745 |
| 6             | 6             | 0           | -0.318015               | -0.721717 | -1.945610 |
| 7             | 6             | 0           | 1.139779                | -0.641473 | -1.516796 |
| 8             | 1             | 0           | -1.937125               | -1.164705 | 2.034133  |
| 9             | 1             | 0           | -1.683458               | -2.893410 | 1.741375  |
| 10            | 1             | 0           | -2.971182               | -2.032975 | 0.897816  |
| 11            | 6             | 0           | 2.561040                | -2.281660 | 0.015166  |
| 12            | 6             | 0           | 2.151781                | -3.198138 | 1.013321  |
| 13            | 7             | 0           | 0.790029                | -3.138801 | 1.132710  |
| 14            | 1             | 0           | 0.240402                | -3.729363 | 1.730332  |

Imaginary frequency: -470.2858 cm<sup>-1</sup>  
 Electronic energy  $E = -4189.701051$  a.u.  
 Enthalpy  $H = -4189.666484$  a.u.  
 Entropy  $S = 212.264$  cal/mol/K  
 Gibbs free energy  $G = -4189.767338$  a.u.  
 Total free energy in solution  $E_{\text{sol}} = -4190.85265$  a.u.

|    |    |   |           |           |           |
|----|----|---|-----------|-----------|-----------|
| 15 | 1  | 0 | -0.584403 | 0.143922  | -2.545773 |
| 16 | 1  | 0 | -0.481374 | -1.629897 | -2.532222 |
| 17 | 1  | 0 | 1.388492  | 0.337295  | -1.107366 |
| 18 | 1  | 0 | 1.769920  | -0.760605 | -2.399785 |
| 19 | 6  | 0 | 3.929283  | -2.072722 | -0.264347 |
| 20 | 6  | 0 | 4.844211  | -2.807127 | 0.455252  |
| 21 | 6  | 0 | 4.417997  | -3.762906 | 1.421893  |
| 22 | 6  | 0 | 3.093142  | -3.971401 | 1.714270  |
| 23 | 1  | 0 | 4.220218  | -1.322960 | -0.984929 |
| 24 | 1  | 0 | 2.794554  | -4.687542 | 2.468431  |
| 25 | 1  | 0 | 5.192362  | -4.312551 | 1.940336  |
| 26 | 8  | 0 | 6.189627  | -2.697581 | 0.335107  |
| 27 | 6  | 0 | 6.669552  | -1.670406 | -0.521135 |
| 28 | 1  | 0 | 6.382777  | -1.863519 | -1.557888 |
| 29 | 1  | 0 | 6.285403  | -0.695649 | -0.211077 |
| 30 | 1  | 0 | 7.751949  | -1.689881 | -0.432740 |
| 31 | 30 | 0 | 1.902436  | 2.740992  | -0.687473 |
| 32 | 17 | 0 | 0.846386  | 2.726239  | -2.618863 |
| 33 | 17 | 0 | 3.788938  | 1.702878  | -0.281375 |
| 34 | 6  | 0 | -4.152489 | 0.314545  | 1.034526  |
| 35 | 6  | 0 | -4.986219 | -0.633882 | 0.245386  |
| 36 | 6  | 0 | -2.901397 | 0.687618  | 0.420247  |
| 37 | 6  | 0 | -2.474015 | 0.108721  | -0.882637 |
| 38 | 6  | 0 | -4.585975 | -1.047057 | -1.025237 |
| 39 | 8  | 0 | -3.438178 | -0.599418 | -1.625205 |
| 40 | 8  | 0 | -4.530574 | 0.711204  | 2.135434  |
| 41 | 6  | 0 | -2.092462 | 1.627980  | 1.035240  |
| 42 | 6  | 0 | -0.856142 | 2.076028  | 0.585847  |
| 43 | 1  | 0 | -2.120875 | 0.906550  | -1.536835 |
| 44 | 1  | 0 | -2.485539 | 2.038337  | 1.959635  |
| 45 | 6  | 0 | -0.122753 | 3.095181  | 1.218953  |
| 46 | 8  | 0 | 1.003357  | 3.526188  | 0.810950  |
| 47 | 1  | 0 | -0.431334 | 1.716205  | -0.340636 |
| 48 | 8  | 0 | -0.636231 | 3.636225  | 2.319516  |
| 49 | 6  | 0 | 0.145901  | 4.651179  | 2.963013  |
| 50 | 1  | 0 | 1.109646  | 4.248383  | 3.267836  |
| 51 | 1  | 0 | 0.299441  | 5.492280  | 2.290452  |
| 52 | 1  | 0 | -0.437634 | 4.951840  | 3.827258  |
| 53 | 6  | 0 | -6.184811 | -1.123192 | 0.769206  |
| 54 | 6  | 0 | -6.970197 | -2.002819 | 0.040882  |
| 55 | 6  | 0 | -6.554569 | -2.401057 | -1.231960 |
| 56 | 6  | 0 | -5.365471 | -1.928485 | -1.770052 |
| 57 | 1  | 0 | -6.468358 | -0.779712 | 1.755400  |
| 58 | 1  | 0 | -7.899140 | -2.375471 | 0.451472  |
| 59 | 1  | 0 | -7.162000 | -3.085412 | -1.810668 |
| 60 | 1  | 0 | -5.028392 | -2.219780 | -2.755611 |

**trans-exo-TS2-VII**

Standard orientation:

| Center Number | Atomic Number | Atomic Type | Coordinates (Angstroms) |           |           |
|---------------|---------------|-------------|-------------------------|-----------|-----------|
|               |               |             | X                       | Y         | Z         |
| 1             | 6             | 0           | 0.176616                | -0.984099 | 1.339007  |
| 2             | 7             | 0           | -1.874404               | -1.313269 | 0.226532  |
| 3             | 6             | 0           | -1.207411               | -0.642607 | 1.168711  |
| 4             | 6             | 0           | -1.916229               | 0.127196  | 2.240252  |
| 5             | 6             | 0           | 0.921301                | -1.586149 | 0.342863  |
| 6             | 6             | 0           | -1.221439               | -2.485155 | -0.392564 |
| 7             | 6             | 0           | 0.220884                | -2.212374 | -0.820077 |

Imaginary frequency: -190.7999 cm<sup>-1</sup>

Electronic energy  $E = -4189.695868$  a.u.

Enthalpy  $H = -4189.662510$  a.u.

Entropy  $S = 205.462$  cal/mol/K

Gibbs free energy  $G = -4189.760132$  a.u.

Total free energy in solution  $E_{\text{sol}} = -4190.87759$  a.u.

|    |    |   |           |           |           |
|----|----|---|-----------|-----------|-----------|
| 8  | 1  | 0 | -1.339451 | 1.004591  | 2.530930  |
| 9  | 1  | 0 | -2.019065 | -0.548817 | 3.095725  |
| 10 | 1  | 0 | -2.909603 | 0.435925  | 1.935179  |
| 11 | 6  | 0 | 2.290175  | -1.389349 | 0.684105  |
| 12 | 6  | 0 | 2.305707  | -0.738608 | 1.943832  |
| 13 | 7  | 0 | 1.012225  | -0.484592 | 2.313642  |
| 14 | 1  | 0 | 0.729367  | 0.001315  | 3.146040  |
| 15 | 1  | 0 | -1.835623 | -2.796559 | -1.233492 |
| 16 | 1  | 0 | -1.230672 | -3.282459 | 0.354299  |
| 17 | 1  | 0 | 0.286231  | -1.574962 | -1.705716 |
| 18 | 1  | 0 | 0.685481  | -3.163490 | -1.089753 |
| 19 | 6  | 0 | 3.511271  | -1.697564 | 0.026822  |
| 20 | 6  | 0 | 4.691731  | -1.396261 | 0.684783  |
| 21 | 6  | 0 | 4.679929  | -0.799372 | 1.975114  |
| 22 | 6  | 0 | 3.510709  | -0.464822 | 2.609723  |
| 23 | 1  | 0 | 3.496883  | -2.174812 | -0.941929 |
| 24 | 1  | 0 | 3.523840  | 0.024937  | 3.574381  |
| 25 | 1  | 0 | 5.639877  | -0.571240 | 2.416449  |
| 26 | 8  | 0 | 5.919148  | -1.602111 | 0.175930  |
| 27 | 6  | 0 | 6.001119  | -1.901068 | -1.212852 |
| 28 | 1  | 0 | 5.592795  | -2.892566 | -1.423192 |
| 29 | 1  | 0 | 5.471900  | -1.142973 | -1.794141 |
| 30 | 1  | 0 | 7.058883  | -1.883186 | -1.456776 |
| 31 | 30 | 0 | 2.858786  | 0.647300  | -0.877515 |
| 32 | 17 | 0 | 2.212583  | -0.232828 | -2.811898 |
| 33 | 17 | 0 | 4.744423  | 1.711226  | -0.468744 |
| 34 | 6  | 0 | -4.567980 | 1.290023  | -0.421987 |
| 35 | 6  | 0 | -5.689775 | 0.320560  | -0.332684 |
| 36 | 6  | 0 | -3.222488 | 0.711461  | -0.413716 |
| 37 | 6  | 0 | -3.100770 | -0.791965 | -0.397038 |
| 38 | 6  | 0 | -5.438461 | -1.005568 | 0.013506  |
| 39 | 8  | 0 | -4.167613 | -1.439903 | 0.295660  |
| 40 | 8  | 0 | -4.780509 | 2.492554  | -0.511457 |
| 41 | 6  | 0 | -2.151477 | 1.564621  | -0.383224 |
| 42 | 6  | 0 | -0.790997 | 1.185460  | -0.417806 |
| 43 | 1  | 0 | -3.075824 | -1.182873 | -1.419349 |
| 44 | 1  | 0 | -2.401484 | 2.610629  | -0.232726 |
| 45 | 6  | 0 | 0.257814  | 2.004875  | 0.061238  |
| 46 | 8  | 0 | 1.477836  | 1.710783  | 0.023675  |
| 47 | 1  | 0 | -0.457726 | 0.330415  | -0.979607 |
| 48 | 8  | 0 | -0.106575 | 3.125378  | 0.693265  |
| 49 | 6  | 0 | 0.966421  | 3.960477  | 1.157015  |
| 50 | 1  | 0 | 1.560650  | 3.433018  | 1.900858  |
| 51 | 1  | 0 | 1.610130  | 4.244939  | 0.327712  |
| 52 | 1  | 0 | 0.482305  | 4.829895  | 1.590358  |
| 53 | 6  | 0 | -7.005450 | 0.731020  | -0.550388 |
| 54 | 6  | 0 | -8.050844 | -0.171759 | -0.428951 |
| 55 | 6  | 0 | -7.780763 | -1.496096 | -0.076558 |
| 56 | 6  | 0 | -6.476970 | -1.921445 | 0.145655  |
| 57 | 1  | 0 | -7.170006 | 1.769267  | -0.807459 |
| 58 | 1  | 0 | -9.070116 | 0.146811  | -0.601709 |
| 59 | 1  | 0 | -8.593157 | -2.204885 | 0.022592  |
| 60 | 1  | 0 | -6.247077 | -2.941867 | 0.421207  |

**trans-exo-IM2-VII**

Standard orientation:

Center Atomic Atomic Coordinates (Angstroms)  
Number Number Type X Y Z

Imaginary frequency: -470.2858 cm<sup>-1</sup>

Electronic energy  $E = -4189.729754$  a.u.

Enthalpy  $H = -4189.695734$  a.u.

Entropy  $S = 209.809$  cal/mol/K

Gibbs free energy  $G = -4189.795421$  a.u.

Total free energy in solution  $E_{sol} = -4190.90935$  a.u.

|    |    |   |           |           |           |
|----|----|---|-----------|-----------|-----------|
| 1  | 6  | 0 | -0.466806 | -0.651239 | -0.991706 |
| 2  | 7  | 0 | 1.688151  | -1.181195 | -0.087279 |
| 3  | 6  | 0 | 0.938587  | -0.167055 | -0.820573 |
| 4  | 6  | 0 | 1.580433  | 0.176951  | -2.168540 |
| 5  | 6  | 0 | -1.126462 | -1.374153 | -0.037070 |
| 6  | 6  | 0 | 1.035709  | -2.403451 | 0.378159  |
| 7  | 6  | 0 | -0.341200 | -2.119761 | 0.997775  |
| 8  | 1  | 0 | 1.075690  | 1.025794  | -2.640279 |
| 9  | 1  | 0 | 1.516209  | -0.691279 | -2.824668 |
| 10 | 1  | 0 | 2.628814  | 0.438314  | -2.051417 |
| 11 | 6  | 0 | -2.524130 | -1.335926 | -0.388502 |
| 12 | 6  | 0 | -2.610640 | -0.632969 | -1.617018 |
| 13 | 7  | 0 | -1.337176 | -0.247055 | -1.972546 |
| 14 | 1  | 0 | -1.121571 | 0.384567  | -2.723555 |
| 15 | 1  | 0 | 1.699772  | -2.860937 | 1.111873  |
| 16 | 1  | 0 | 0.914598  | -3.112728 | -0.446056 |
| 17 | 1  | 0 | -0.245534 | -1.549452 | 1.924322  |
| 18 | 1  | 0 | -0.833607 | -3.065011 | 1.239342  |
| 19 | 6  | 0 | -3.689485 | -1.887930 | 0.199847  |
| 20 | 6  | 0 | -4.886129 | -1.727409 | -0.471406 |
| 21 | 6  | 0 | -4.942781 | -1.062311 | -1.724949 |
| 22 | 6  | 0 | -3.826589 | -0.521333 | -2.309221 |
| 23 | 1  | 0 | -3.619038 | -2.393345 | 1.151901  |
| 24 | 1  | 0 | -3.893196 | 0.004950  | -3.251956 |
| 25 | 1  | 0 | -5.915551 | -0.964086 | -2.186126 |
| 26 | 8  | 0 | -6.083071 | -2.167513 | -0.018907 |
| 27 | 6  | 0 | -6.120142 | -2.694416 | 1.296627  |
| 28 | 1  | 0 | -5.533039 | -3.613886 | 1.367466  |
| 29 | 1  | 0 | -5.747171 | -1.960990 | 2.015292  |
| 30 | 1  | 0 | -7.163948 | -2.913682 | 1.501617  |
| 31 | 30 | 0 | -2.647462 | 0.827736  | 0.674312  |
| 32 | 17 | 0 | -1.789748 | 0.529818  | 2.701947  |
| 33 | 17 | 0 | -4.536603 | 1.848114  | 0.213242  |
| 34 | 6  | 0 | 4.668074  | 0.991779  | 0.767900  |
| 35 | 6  | 0 | 5.664705  | -0.034670 | 0.397504  |
| 36 | 6  | 0 | 3.254744  | 0.597405  | 0.510759  |
| 37 | 6  | 0 | 2.995661  | -0.875723 | 0.325031  |
| 38 | 6  | 0 | 5.267799  | -1.177744 | -0.312092 |
| 39 | 8  | 0 | 3.968026  | -1.423469 | -0.626175 |
| 40 | 8  | 0 | 4.968143  | 2.085053  | 1.211148  |
| 41 | 6  | 0 | 2.283296  | 1.508027  | 0.466881  |
| 42 | 6  | 0 | 0.882324  | 1.076064  | 0.158355  |
| 43 | 1  | 0 | 3.208133  | -1.384976 | 1.272188  |
| 44 | 1  | 0 | 2.521540  | 2.548569  | 0.650756  |
| 45 | 6  | 0 | -0.041215 | 2.152660  | -0.330482 |
| 46 | 8  | 0 | -1.265825 | 2.053808  | -0.292895 |
| 47 | 1  | 0 | 0.397810  | 0.701841  | 1.068509  |
| 48 | 8  | 0 | 0.544545  | 3.215173  | -0.838225 |
| 49 | 6  | 0 | -0.335909 | 4.275019  | -1.279537 |
| 50 | 1  | 0 | -0.966886 | 3.913475  | -2.087797 |
| 51 | 1  | 0 | -0.957861 | 4.600208  | -0.449709 |
| 52 | 1  | 0 | 0.323640  | 5.066339  | -1.617004 |
| 53 | 6  | 0 | 7.020991  | 0.175703  | 0.670245  |
| 54 | 6  | 0 | 7.971378  | -0.736970 | 0.250699  |
| 55 | 6  | 0 | 7.564845  | -1.869448 | -0.464489 |
| 56 | 6  | 0 | 6.226475  | -2.094947 | -0.746158 |
| 57 | 1  | 0 | 7.290465  | 1.075621  | 1.207809  |
| 58 | 1  | 0 | 9.019021  | -0.576094 | 0.465944  |
| 59 | 1  | 0 | 8.303603  | -2.585957 | -0.801420 |
| 60 | 1  | 0 | 5.897385  | -2.967749 | -1.293638 |

---

### 5.3 (R)-5a-Zn-catalyzed reaction

#### 5.3.1 Kumar's transition state models

##### **cis-endo-c-TS-Re**

Standard orientation:

| Center Number | Atomic Number | Atomic Type | Coordinates (Angstroms) |           |           |
|---------------|---------------|-------------|-------------------------|-----------|-----------|
|               |               |             | X                       | Y         | Z         |
| 1             | 6             | 0           | -2.623988               | 4.359429  | 0.878912  |
| 2             | 6             | 0           | -3.671883               | 4.202913  | -0.065026 |
| 3             | 6             | 0           | -3.934958               | 2.906761  | -0.588143 |
| 4             | 6             | 0           | -3.159123               | 1.781309  | -0.155453 |
| 5             | 6             | 0           | -1.865564               | 3.291176  | 1.255905  |
| 6             | 6             | 0           | -2.103828               | 1.988683  | 0.728451  |
| 7             | 6             | 0           | -3.573447               | 0.416140  | -0.615950 |
| 8             | 6             | 0           | -4.793493               | -0.135030 | -0.097245 |
| 9             | 6             | 0           | -5.302203               | -1.363179 | -0.606008 |
| 10            | 6             | 0           | -4.580012               | -2.028721 | -1.631798 |
| 11            | 6             | 0           | -2.858652               | -0.307567 | -1.570255 |
| 12            | 6             | 0           | -3.399896               | -1.521848 | -2.089281 |
| 13            | 6             | 0           | -4.450148               | 5.307426  | -0.489425 |
| 14            | 6             | 0           | -5.457156               | 5.149988  | -1.405812 |
| 15            | 6             | 0           | -5.717709               | 3.867355  | -1.937166 |
| 16            | 6             | 0           | -4.982325               | 2.778968  | -1.540761 |
| 17            | 6             | 0           | -5.518104               | 0.499057  | 0.949058  |
| 18            | 6             | 0           | -6.670248               | -0.053876 | 1.449332  |
| 19            | 6             | 0           | -7.174443               | -1.268685 | 0.932710  |
| 20            | 6             | 0           | -6.498130               | -1.905957 | -0.075063 |
| 21            | 1             | 0           | -2.431451               | 5.344587  | 1.289056  |
| 22            | 1             | 0           | -1.053789               | 3.391662  | 1.965483  |
| 23            | 1             | 0           | -4.229041               | 6.283948  | -0.072856 |
| 24            | 1             | 0           | -6.046921               | 5.999712  | -1.725620 |
| 25            | 1             | 0           | -6.505740               | 3.741348  | -2.669324 |
| 26            | 1             | 0           | -5.187442               | 1.804991  | -1.963874 |
| 27            | 1             | 0           | -5.138585               | 1.426509  | 1.355706  |
| 28            | 1             | 0           | -7.199213               | 0.447649  | 2.250245  |
| 29            | 1             | 0           | -8.087130               | -1.690819 | 1.333666  |
| 30            | 1             | 0           | -6.865703               | -2.841141 | -0.482602 |
| 31            | 1             | 0           | -4.974246               | -2.955609 | -2.032886 |
| 32            | 1             | 0           | -2.822881               | -2.027661 | -2.853501 |
| 33            | 8             | 0           | -1.639076               | 0.066158  | -2.007218 |
| 34            | 8             | 0           | -1.270244               | 1.008695  | 1.129167  |
| 35            | 30            | 0           | -0.728406               | 0.090510  | -0.380183 |
| 36            | 6             | 0           | 3.302980                | 0.304541  | -0.604338 |
| 37            | 7             | 0           | 1.163569                | -0.697803 | -0.233294 |
| 38            | 6             | 0           | 2.135012                | -0.374584 | -1.128907 |
| 39            | 6             | 0           | 3.343216                | 0.863705  | 0.653129  |
| 40            | 6             | 0           | 1.589178                | -0.719641 | 1.190736  |
| 41            | 6             | 0           | 2.212598                | 0.612444  | 1.596301  |
| 42            | 6             | 0           | 4.538799                | 1.638806  | 0.721637  |
| 43            | 6             | 0           | 5.180159                | 1.501953  | -0.530986 |
| 44            | 7             | 0           | 4.396595                | 0.707093  | -1.334876 |
| 45            | 1             | 0           | 4.635878                | 0.355728  | -2.246150 |
| 46            | 1             | 0           | 2.335259                | -1.505962 | 1.328910  |
| 47            | 1             | 0           | 0.705254                | -0.939879 | 1.789924  |
| 48            | 1             | 0           | 2.559422                | 0.529355  | 2.628165  |
| 49            | 1             | 0           | 1.459911                | 1.407626  | 1.563492  |
| 50            | 6             | 0           | 5.118890                | 2.429770  | 1.734023  |
| 51            | 6             | 0           | 6.325329                | 3.045531  | 1.463337  |
| 52            | 6             | 0           | 6.962001                | 2.887742  | 0.206639  |

Imaginary frequency: -433.4941 cm<sup>-1</sup>  
 Electronic energy  $E = -4188.770018$  a.u.  
 Enthalpy  $H = -4188.722827$  a.u.  
 Entropy  $S = 274.857$  cal/mol/K  
 Gibbs free energy  $G = -4188.853420$  a.u.  
 Total free energy in solution  $E_{\text{sol}} = -4190.36292$  a.u.

|    |   |   |           |           |           |
|----|---|---|-----------|-----------|-----------|
| 53 | 6 | 0 | 6.406895  | 2.124762  | -0.794473 |
| 54 | 8 | 0 | 7.004072  | 3.837099  | 2.338401  |
| 55 | 6 | 0 | 6.417828  | 4.039706  | 3.609632  |
| 56 | 1 | 0 | 4.621876  | 2.536922  | 2.687283  |
| 57 | 1 | 0 | 7.905948  | 3.395581  | 0.062560  |
| 58 | 1 | 0 | 6.902514  | 2.018195  | -1.751003 |
| 59 | 1 | 0 | 6.308997  | 3.093603  | 4.146762  |
| 60 | 1 | 0 | 7.095599  | 4.691548  | 4.153941  |
| 61 | 1 | 0 | 5.440386  | 4.520995  | 3.518757  |
| 62 | 6 | 0 | 1.685898  | 0.003783  | -2.521491 |
| 63 | 1 | 0 | 1.433646  | 1.068386  | -2.511590 |
| 64 | 1 | 0 | 2.480503  | -0.152932 | -3.249636 |
| 65 | 1 | 0 | 0.788756  | -0.530666 | -2.834639 |
| 66 | 6 | 0 | 0.964730  | -4.024482 | 1.137311  |
| 67 | 6 | 0 | -0.373352 | -3.735913 | 1.702075  |
| 68 | 6 | 0 | 1.275417  | -3.313111 | -0.111763 |
| 69 | 6 | 0 | 0.369003  | -2.360572 | -0.634057 |
| 70 | 6 | 0 | -1.229140 | -2.829772 | 1.082434  |
| 71 | 8 | 0 | -0.879748 | -2.201198 | -0.108089 |
| 72 | 8 | 0 | 1.752172  | -4.787933 | 1.670895  |
| 73 | 6 | 0 | 2.580528  | -3.269755 | -0.592648 |
| 74 | 6 | 0 | 2.963858  | -2.481301 | -1.670395 |
| 75 | 1 | 0 | 0.327589  | -2.175043 | -1.698704 |
| 76 | 1 | 0 | 3.347516  | -3.763440 | -0.004104 |
| 77 | 6 | 0 | 4.404994  | -2.371485 | -1.952437 |
| 78 | 8 | 0 | 5.297901  | -2.780192 | -1.251347 |
| 79 | 8 | 0 | 4.638135  | -1.707378 | -3.117833 |
| 80 | 6 | 0 | 6.029562  | -1.614127 | -3.464172 |
| 81 | 1 | 0 | 6.060245  | -1.093330 | -4.416535 |
| 82 | 1 | 0 | 6.458878  | -2.609393 | -3.553644 |
| 83 | 1 | 0 | 6.574190  | -1.065540 | -2.695412 |
| 84 | 6 | 0 | -0.799944 | -4.346473 | 2.885290  |
| 85 | 6 | 0 | -2.046394 | -4.052203 | 3.413036  |
| 86 | 6 | 0 | -2.881196 | -3.136853 | 2.763709  |
| 87 | 6 | 0 | -2.480703 | -2.514720 | 1.589187  |
| 88 | 1 | 0 | -0.124178 | -5.045512 | 3.360160  |
| 89 | 1 | 0 | -2.374003 | -4.527526 | 4.327861  |
| 90 | 1 | 0 | -3.855591 | -2.902460 | 3.171916  |
| 91 | 1 | 0 | -3.107972 | -1.800753 | 1.070160  |
| 92 | 1 | 0 | 2.301854  | -2.325562 | -2.509847 |

**cis-endo-c-TS-Si**

Standard orientation:

| Center Number | Atomic Number | Atomic Type | Coordinates (Angstroms) |           |           |
|---------------|---------------|-------------|-------------------------|-----------|-----------|
|               |               |             | X                       | Y         | Z         |
| 1             | 6             | 0           | -5.100531               | 1.827616  | 1.913602  |
| 2             | 6             | 0           | -5.904563               | 1.073476  | 1.019990  |
| 3             | 6             | 0           | -5.303687               | 0.014929  | 0.283451  |
| 4             | 6             | 0           | -3.910342               | -0.283919 | 0.449419  |
| 5             | 6             | 0           | -3.767207               | 1.565307  | 2.036721  |
| 6             | 6             | 0           | -3.144071               | 0.524989  | 1.285336  |
| 7             | 6             | 0           | -3.369101               | -1.515941 | -0.215542 |
| 8             | 6             | 0           | -3.795343               | -2.792152 | 0.281939  |
| 9             | 6             | 0           | -3.461180               | -3.985519 | -0.416561 |
| 10            | 6             | 0           | -2.702602               | -3.888095 | -1.611109 |
| 11            | 6             | 0           | -2.552435               | -1.472710 | -1.344593 |
| 12            | 6             | 0           | -2.262010               | -2.675588 | -2.055056 |
| 13            | 6             | 0           | -7.282657               | 1.356108  | 0.855863  |
| 14            | 6             | 0           | -8.052827               | 0.626594  | -0.011930 |

Imaginary frequency: -453.8089 cm<sup>-1</sup>  
 Electronic energy  $E = -4188.765040$  a.u.  
 Enthalpy  $H = -4188.717777$  a.u.  
 Entropy  $S = 273.927$  cal/mol/K  
 Gibbs free energy  $G = -4188.847929$  a.u.  
 Total free energy in solution  $E_{\text{sol}} = -4190.35736$  a.u.

|    |    |   |           |           |           |
|----|----|---|-----------|-----------|-----------|
| 15 | 6  | 0 | -7.460981 | -0.419198 | -0.754469 |
| 16 | 6  | 0 | -6.129564 | -0.718670 | -0.611006 |
| 17 | 6  | 0 | -4.555780 | -2.916486 | 1.476384  |
| 18 | 6  | 0 | -4.954141 | -4.145314 | 1.938551  |
| 19 | 6  | 0 | -4.625609 | -5.325770 | 1.234892  |
| 20 | 6  | 0 | -3.892175 | -5.240100 | 0.080396  |
| 21 | 1  | 0 | -5.563076 | 2.618979  | 2.493367  |
| 22 | 1  | 0 | -3.131259 | 2.136221  | 2.702141  |
| 23 | 1  | 0 | -7.715352 | 2.165896  | 1.433035  |
| 24 | 1  | 0 | -9.105339 | 0.849156  | -0.132683 |
| 25 | 1  | 0 | -8.064871 | -0.991071 | -1.448047 |
| 26 | 1  | 0 | -5.688630 | -1.516818 | -1.192321 |
| 27 | 1  | 0 | -4.808291 | -2.021226 | 2.027909  |
| 28 | 1  | 0 | -5.526379 | -4.210981 | 2.855623  |
| 29 | 1  | 0 | -4.950409 | -6.288229 | 1.609248  |
| 30 | 1  | 0 | -3.626777 | -6.133450 | -0.474103 |
| 31 | 1  | 0 | -2.477005 | -4.793462 | -2.163725 |
| 32 | 1  | 0 | -1.683209 | -2.581203 | -2.965926 |
| 33 | 8  | 0 | -2.004223 | -0.332235 | -1.811938 |
| 34 | 8  | 0 | -1.810040 | 0.389248  | 1.419824  |
| 35 | 30 | 0 | -1.158075 | 0.361480  | -0.308927 |
| 36 | 6  | 0 | 2.834006  | -0.951759 | -0.173981 |
| 37 | 7  | 0 | 0.943933  | 0.510440  | -0.383253 |
| 38 | 6  | 0 | 1.708712  | -0.475008 | -0.930667 |
| 39 | 6  | 0 | 3.417337  | -0.268862 | 0.869816  |
| 40 | 6  | 0 | 1.331351  | 0.995996  | 0.980545  |
| 41 | 6  | 0 | 2.828400  | 1.032501  | 1.305694  |
| 42 | 6  | 0 | 4.556495  | -1.018383 | 1.272981  |
| 43 | 6  | 0 | 4.609922  | -2.155320 | 0.431722  |
| 44 | 7  | 0 | 3.560157  | -2.089250 | -0.451503 |
| 45 | 1  | 0 | 3.334902  | -2.775483 | -1.149424 |
| 46 | 1  | 0 | 0.838367  | 0.308559  | 1.671496  |
| 47 | 1  | 0 | 0.867946  | 1.970449  | 1.122349  |
| 48 | 1  | 0 | 2.923618  | 1.169126  | 2.385535  |
| 49 | 1  | 0 | 3.335600  | 1.875633  | 0.830483  |
| 50 | 6  | 0 | 5.531963  | -0.829823 | 2.274122  |
| 51 | 6  | 0 | 6.520778  | -1.784193 | 2.402377  |
| 52 | 6  | 0 | 6.554331  | -2.923101 | 1.557004  |
| 53 | 6  | 0 | 5.612173  | -3.124074 | 0.575642  |
| 54 | 8  | 0 | 7.526777  | -1.739271 | 3.317330  |
| 55 | 6  | 0 | 7.555796  | -0.621632 | 4.184338  |
| 56 | 1  | 0 | 5.491829  | 0.044275  | 2.907485  |
| 57 | 1  | 0 | 7.354906  | -3.632939 | 1.715192  |
| 58 | 1  | 0 | 5.649140  | -4.000621 | -0.058738 |
| 59 | 1  | 0 | 6.650008  | -0.575515 | 4.794848  |
| 60 | 1  | 0 | 8.421087  | -0.761023 | 4.826635  |
| 61 | 1  | 0 | 7.662918  | 0.308817  | 3.620450  |
| 62 | 6  | 0 | 1.070855  | -1.370609 | -1.956706 |
| 63 | 1  | 0 | 1.813402  | -1.776014 | -2.643454 |
| 64 | 1  | 0 | 0.577059  | -2.194925 | -1.429206 |
| 65 | 1  | 0 | 0.286039  | -0.859596 | -2.514861 |
| 66 | 6  | 0 | 1.876883  | 3.884996  | -0.698226 |
| 67 | 6  | 0 | 0.574825  | 4.329252  | -0.140976 |
| 68 | 6  | 0 | 1.822204  | 2.661558  | -1.494246 |
| 69 | 6  | 0 | 0.640213  | 1.869830  | -1.513596 |
| 70 | 6  | 0 | -0.574795 | 3.563689  | -0.311606 |
| 71 | 8  | 0 | -0.554686 | 2.381562  | -1.046302 |
| 72 | 8  | 0 | 2.913254  | 4.498559  | -0.489934 |
| 73 | 6  | 0 | 2.991726  | 2.030724  | -1.917941 |
| 74 | 6  | 0 | 2.996091  | 0.799311  | -2.543695 |
| 75 | 1  | 0 | 0.423073  | 1.269204  | -2.388114 |
| 76 | 1  | 0 | 3.936947  | 2.460736  | -1.601412 |



|    |   |   |           |           |           |
|----|---|---|-----------|-----------|-----------|
| 77 | 6 | 0 | 4.270279  | 0.076826  | -2.647843 |
| 78 | 8 | 0 | 5.302824  | 0.398687  | -2.107124 |
| 79 | 1 | 0 | 2.189301  | 0.469001  | -3.181313 |
| 80 | 8 | 0 | 4.144626  | -1.053669 | -3.382586 |
| 81 | 6 | 0 | 5.351803  | -1.821354 | -3.476164 |
| 82 | 1 | 0 | 6.133917  | -1.232866 | -3.951497 |
| 83 | 1 | 0 | 5.688170  | -2.114742 | -2.481983 |
| 84 | 1 | 0 | 5.102782  | -2.688618 | -4.080796 |
| 85 | 6 | 0 | 0.480933  | 5.509946  | 0.600348  |
| 86 | 6 | 0 | -0.731988 | 5.901888  | 1.143659  |
| 87 | 6 | 0 | -1.866793 | 5.107924  | 0.957282  |
| 88 | 6 | 0 | -1.799517 | 3.929133  | 0.225583  |
| 89 | 1 | 0 | 1.384339  | 6.091299  | 0.729543  |
| 90 | 1 | 0 | -0.800472 | 6.817793  | 1.714955  |
| 91 | 1 | 0 | -2.814776 | 5.405610  | 1.386042  |
| 92 | 1 | 0 | -2.667188 | 3.298180  | 0.077756  |

**cis-exo-c-TS-Re**

Standard orientation:

| Center Number | Atomic Number | Atomic Type | Coordinates (Angstroms) |           |           |
|---------------|---------------|-------------|-------------------------|-----------|-----------|
|               |               |             | X                       | Y         | Z         |
| 1             | 6             | 0           | 2.950029                | -0.255398 | -0.240031 |
| 2             | 7             | 0           | 1.088425                | -1.316534 | 0.860075  |
| 3             | 6             | 0           | 1.968073                | -1.331744 | -0.190224 |
| 4             | 6             | 0           | 2.907607                | 0.846867  | 0.575700  |
| 5             | 6             | 0           | 1.516474                | -0.510488 | 2.036500  |
| 6             | 6             | 0           | 1.879098                | 0.921778  | 1.654644  |
| 7             | 6             | 0           | 3.900003                | 1.756766  | 0.092219  |
| 8             | 6             | 0           | 4.508861                | 1.132002  | -1.025845 |
| 9             | 7             | 0           | 3.899125                | -0.087382 | -1.224340 |
| 10            | 1             | 0           | 4.165645                | -0.782884 | -1.902819 |
| 11            | 1             | 0           | 2.405351                | -0.970514 | 2.483841  |
| 12            | 1             | 0           | 0.693642                | -0.532368 | 2.750490  |
| 13            | 1             | 0           | 2.256956                | 1.430446  | 2.544198  |
| 14            | 1             | 0           | 0.993616                | 1.476780  | 1.324061  |
| 15            | 6             | 0           | 4.325480                | 3.026854  | 0.497010  |
| 16            | 6             | 0           | 5.347194                | 3.643506  | -0.206383 |
| 17            | 6             | 0           | 5.950259                | 3.008667  | -1.314249 |
| 18            | 6             | 0           | 5.537526                | 1.753380  | -1.731566 |
| 19            | 8             | 0           | 5.719187                | 4.876781  | 0.243759  |
| 20            | 6             | 0           | 6.701104                | 5.581324  | -0.489923 |
| 21            | 1             | 0           | 3.880058                | 3.542142  | 1.337420  |
| 22            | 1             | 0           | 6.744014                | 3.499981  | -1.857761 |
| 23            | 1             | 0           | 5.998116                | 1.282442  | -2.590789 |
| 24            | 1             | 0           | 6.382041                | 5.746843  | -1.522463 |
| 25            | 1             | 0           | 6.816614                | 6.539230  | 0.010024  |
| 26            | 1             | 0           | 7.658654                | 5.053343  | -0.483947 |
| 27            | 6             | 0           | 1.436058                | -1.805335 | -1.516605 |
| 28            | 1             | 0           | 0.921741                | -0.961782 | -1.985742 |
| 29            | 1             | 0           | 2.242692                | -2.154240 | -2.161063 |
| 30            | 1             | 0           | 0.701591                | -2.598805 | -1.396429 |
| 31            | 6             | 0           | -4.804710               | -0.736177 | -2.273237 |
| 32            | 6             | 0           | -5.483846               | 0.098476  | -1.347194 |
| 33            | 6             | 0           | -4.715406               | 0.873147  | -0.432658 |
| 34            | 6             | 0           | -3.281529               | 0.805713  | -0.448276 |
| 35            | 6             | 0           | -3.445136               | -0.838034 | -2.242455 |

Imaginary frequency: -422.4492 cm<sup>-1</sup>  
 Electronic energy  $E = -4188.771118$  a.u.  
 Enthalpy  $H = -4188.724355$  a.u.  
 Entropy  $S = 265.848$  cal/mol/K  
 Gibbs free energy  $G = -4188.850668$  a.u.  
 Total free energy in solution  $E_{\text{sol}} = -4190.36150$  a.u.

|    |    |   |           |           |           |
|----|----|---|-----------|-----------|-----------|
| 36 | 6  | 0 | -2.663988 | -0.104553 | -1.301427 |
| 37 | 6  | 0 | -2.514624 | 1.782085  | 0.390022  |
| 38 | 6  | 0 | -2.574622 | 3.171539  | 0.034349  |
| 39 | 6  | 0 | -2.002023 | 4.157782  | 0.885131  |
| 40 | 6  | 0 | -1.364523 | 3.741757  | 2.081864  |
| 41 | 6  | 0 | -1.810209 | 1.410636  | 1.531683  |
| 42 | 6  | 0 | -1.269404 | 2.415975  | 2.388471  |
| 43 | 6  | 0 | -6.898286 | 0.173867  | -1.323058 |
| 44 | 6  | 0 | -7.546581 | 0.979967  | -0.423386 |
| 45 | 6  | 0 | -6.791232 | 1.744902  | 0.493044  |
| 46 | 6  | 0 | -5.419617 | 1.697034  | 0.487245  |
| 47 | 6  | 0 | -3.197218 | 3.616270  | -1.163875 |
| 48 | 6  | 0 | -3.251186 | 4.949358  | -1.483886 |
| 49 | 6  | 0 | -2.691681 | 5.923523  | -0.627365 |
| 50 | 6  | 0 | -2.078120 | 5.527496  | 0.532341  |
| 51 | 1  | 0 | -5.385379 | -1.300491 | -2.995133 |
| 52 | 1  | 0 | -2.906555 | -1.492278 | -2.916829 |
| 53 | 1  | 0 | -7.458562 | -0.421914 | -2.035338 |
| 54 | 1  | 0 | -8.627951 | 1.031166  | -0.411346 |
| 55 | 1  | 0 | -7.300453 | 2.376711  | 1.210205  |
| 56 | 1  | 0 | -4.854248 | 2.284171  | 1.198056  |
| 57 | 1  | 0 | -3.622798 | 2.882228  | -1.834122 |
| 58 | 1  | 0 | -3.726595 | 5.257933  | -2.406754 |
| 59 | 1  | 0 | -2.745265 | 6.972378  | -0.890441 |
| 60 | 1  | 0 | -1.636422 | 6.257374  | 1.201867  |
| 61 | 1  | 0 | -0.950518 | 4.493617  | 2.744604  |
| 62 | 1  | 0 | -0.780426 | 2.075114  | 3.293572  |
| 63 | 8  | 0 | -1.615887 | 0.131824  | 1.896137  |
| 64 | 8  | 0 | -1.342642 | -0.351175 | -1.284842 |
| 65 | 30 | 0 | -0.855272 | -0.787111 | 0.452481  |
| 66 | 6  | 0 | 0.055840  | -4.769627 | -0.050206 |
| 67 | 6  | 0 | -1.285500 | -4.175012 | 0.151371  |
| 68 | 6  | 0 | 1.118380  | -4.054228 | 0.672431  |
| 69 | 6  | 0 | 0.772201  | -3.089783 | 1.652095  |
| 70 | 6  | 0 | -1.493876 | -3.241716 | 1.170695  |
| 71 | 8  | 0 | -0.498586 | -2.967611 | 2.094441  |
| 72 | 8  | 0 | 0.267483  | -5.678129 | -0.833683 |
| 73 | 6  | 0 | 2.382779  | -3.982066 | 0.100688  |
| 74 | 6  | 0 | 3.284425  | -2.981546 | 0.443443  |
| 75 | 1  | 0 | 1.463110  | -2.882116 | 2.457846  |
| 76 | 1  | 0 | 2.568574  | -4.584136 | -0.782804 |
| 77 | 6  | 0 | 4.518959  | -2.814913 | -0.342115 |
| 78 | 8  | 0 | 4.619255  | -3.049037 | -1.532420 |
| 79 | 1  | 0 | 3.330142  | -2.578981 | 1.446699  |
| 80 | 8  | 0 | 5.504160  | -2.297682 | 0.397687  |
| 81 | 6  | 0 | 6.715841  | -2.001496 | -0.309888 |
| 82 | 1  | 0 | 7.056439  | -2.877788 | -0.856557 |
| 83 | 1  | 0 | 6.546453  | -1.177516 | -1.002348 |
| 84 | 1  | 0 | 7.432569  | -1.710475 | 0.450990  |
| 85 | 6  | 0 | -2.333642 | -4.449490 | -0.727979 |
| 86 | 6  | 0 | -3.546901 | -3.790227 | -0.595570 |
| 87 | 6  | 0 | -3.728173 | -2.850660 | 0.420509  |
| 88 | 6  | 0 | -2.709784 | -2.581920 | 1.331736  |
| 89 | 1  | 0 | -2.153293 | -5.168767 | -1.516154 |
| 90 | 1  | 0 | -4.347547 | -3.979335 | -1.297452 |
| 91 | 1  | 0 | -4.659904 | -2.305443 | 0.496796  |
| 92 | 1  | 0 | -2.826811 | -1.858660 | 2.127654  |

**cis-exo-c-TS-Si**

Standard orientation:

Imaginary frequency: -464.4711 cm<sup>-1</sup>  
 Electronic energy  $E = -4188.770155$  a.u.  
 Enthalpy  $H = -4188.723648$  a.u.

| Center Number | Atomic Number | Atomic Type | Coordinates (Angstroms) |           |           | Entropy $S = 262.800$ cal/mol/K                                   |
|---------------|---------------|-------------|-------------------------|-----------|-----------|-------------------------------------------------------------------|
|               |               |             | X                       | Y         | Z         | Gibbs free energy $G = -4188.848512$ a.u.                         |
|               |               |             |                         |           |           | Total free energy in solution $E_{\text{sol}} = -4190.36215$ a.u. |
| 1             | 6             | 0           | 0.144743                | -4.052311 | -1.020656 |                                                                   |
| 2             | 6             | 0           | 1.344003                | -3.661195 | -0.241767 |                                                                   |
| 3             | 6             | 0           | -1.112395               | -3.549897 | -0.440326 |                                                                   |
| 4             | 6             | 0           | -1.104946               | -2.981471 | 0.859263  |                                                                   |
| 5             | 6             | 0           | 1.196600                | -3.120875 | 1.041295  |                                                                   |
| 6             | 8             | 0           | -0.034700               | -3.120020 | 1.673643  |                                                                   |
| 7             | 8             | 0           | 0.205074                | -4.635320 | -2.087284 |                                                                   |
| 8             | 6             | 0           | -2.178348               | -3.231840 | -1.270963 |                                                                   |
| 9             | 6             | 0           | -3.199005               | -2.394459 | -0.834988 |                                                                   |
| 10            | 1             | 0           | -2.011622               | -2.980389 | 1.447711  |                                                                   |
| 11            | 1             | 0           | -2.096190               | -3.472739 | -2.325676 |                                                                   |
| 12            | 6             | 0           | -4.221536               | -1.921714 | -1.787591 |                                                                   |
| 13            | 8             | 0           | -4.051328               | -1.792920 | -2.982472 |                                                                   |
| 14            | 1             | 0           | -3.511509               | -2.380564 | 0.199222  |                                                                   |
| 15            | 8             | 0           | -5.355019               | -1.594660 | -1.155236 |                                                                   |
| 16            | 6             | 0           | -6.382841               | -1.048790 | -1.991227 |                                                                   |
| 17            | 1             | 0           | -5.995843               | -0.202418 | -2.554995 |                                                                   |
| 18            | 1             | 0           | -7.168785               | -0.728779 | -1.314720 |                                                                   |
| 19            | 1             | 0           | -6.742560               | -1.809070 | -2.682362 |                                                                   |
| 20            | 6             | 0           | 2.615119                | -3.680388 | -0.812625 |                                                                   |
| 21            | 6             | 0           | 3.702915                | -3.162586 | -0.122691 |                                                                   |
| 22            | 6             | 0           | 3.531785                | -2.607487 | 1.144370  |                                                                   |
| 23            | 6             | 0           | 2.275164                | -2.597240 | 1.747636  |                                                                   |
| 24            | 1             | 0           | 2.708860                | -4.072206 | -1.816411 |                                                                   |
| 25            | 1             | 0           | 4.679964                | -3.146593 | -0.585506 |                                                                   |
| 26            | 1             | 0           | 4.367555                | -2.157702 | 1.664540  |                                                                   |
| 27            | 1             | 0           | 2.121903                | -2.186762 | 2.737089  |                                                                   |
| 28            | 6             | 0           | 2.076220                | 2.247378  | -3.260028 |                                                                   |
| 29            | 6             | 0           | 2.737647                | 3.160346  | -2.399693 |                                                                   |
| 30            | 6             | 0           | 3.151062                | 2.712782  | -1.113595 |                                                                   |
| 31            | 6             | 0           | 2.909942                | 1.359511  | -0.705424 |                                                                   |
| 32            | 6             | 0           | 1.810937                | 0.974603  | -2.846424 |                                                                   |
| 33            | 6             | 0           | 2.192875                | 0.516149  | -1.549389 |                                                                   |
| 34            | 6             | 0           | 3.494172                | 0.890889  | 0.590271  |                                                                   |
| 35            | 6             | 0           | 4.917756                | 0.767799  | 0.703245  |                                                                   |
| 36            | 6             | 0           | 5.520208                | 0.475690  | 1.960077  |                                                                   |
| 37            | 6             | 0           | 4.684411                | 0.311494  | 3.095365  |                                                                   |
| 38            | 6             | 0           | 2.705235                | 0.626427  | 1.707168  |                                                                   |
| 39            | 6             | 0           | 3.326727                | 0.379066  | 2.968174  |                                                                   |
| 40            | 8             | 0           | 1.852503                | -0.740544 | -1.224088 |                                                                   |
| 41            | 8             | 0           | 1.367349                | 0.562776  | 1.659904  |                                                                   |
| 42            | 1             | 0           | 1.784693                | 2.577715  | -4.250911 |                                                                   |
| 43            | 1             | 0           | 1.311443                | 0.261034  | -3.490653 |                                                                   |
| 44            | 6             | 0           | 2.992747                | 4.495018  | -2.799754 |                                                                   |
| 45            | 6             | 0           | 3.802327                | 3.651402  | -0.267154 |                                                                   |
| 46            | 6             | 0           | 6.928842                | 0.353660  | 2.058129  |                                                                   |
| 47            | 6             | 0           | 5.776326                | 0.915051  | -0.421150 |                                                                   |
| 48            | 1             | 0           | 5.141000                | 0.124053  | 4.061145  |                                                                   |
| 49            | 1             | 0           | 2.669446                | 0.245203  | 3.819353  |                                                                   |
| 50            | 6             | 0           | 3.629426                | 5.373167  | -1.961973 |                                                                   |
| 51            | 6             | 0           | 4.031370                | 4.940022  | -0.678575 |                                                                   |
| 52            | 6             | 0           | 7.136355                | 0.783687  | -0.298103 |                                                                   |
| 53            | 6             | 0           | 7.727745                | 0.504395  | 0.954770  |                                                                   |
| 54            | 1             | 0           | 5.336066                | 1.124816  | -1.386401 |                                                                   |
| 55            | 1             | 0           | 7.765009                | 0.895365  | -1.172993 |                                                                   |
| 56            | 1             | 0           | 8.803046                | 0.408961  | 1.037749  |                                                                   |
| 57            | 1             | 0           | 7.361323                | 0.137010  | 3.028859  |                                                                   |
| 58            | 1             | 0           | 2.670440                | 4.807467  | -3.786941 |                                                                   |
| 59            | 1             | 0           | 3.820313                | 6.391737  | -2.275412 |                                                                   |

|    |    |   |           |           |           |
|----|----|---|-----------|-----------|-----------|
| 60 | 1  | 0 | 4.524852  | 5.634397  | -0.009731 |
| 61 | 1  | 0 | 4.108972  | 3.337185  | 0.720961  |
| 62 | 30 | 0 | 0.899768  | -0.722169 | 0.378499  |
| 63 | 6  | 0 | -3.015060 | 0.264332  | -0.168724 |
| 64 | 7  | 0 | -1.139662 | -1.048902 | 0.597870  |
| 65 | 6  | 0 | -1.915610 | -0.641957 | -0.463418 |
| 66 | 6  | 0 | -1.236090 | -0.517478 | -1.799454 |
| 67 | 6  | 0 | -3.594886 | 0.399823  | 1.067047  |
| 68 | 6  | 0 | -1.509399 | -0.513656 | 1.943359  |
| 69 | 6  | 0 | -3.008650 | -0.356288 | 2.214846  |
| 70 | 1  | 0 | -1.951383 | -0.593859 | -2.618861 |
| 71 | 1  | 0 | -0.733297 | 0.456008  | -1.842006 |
| 72 | 1  | 0 | -0.464157 | -1.274476 | -1.929094 |
| 73 | 6  | 0 | -4.715928 | 1.266785  | 0.909035  |
| 74 | 6  | 0 | -4.752373 | 1.628449  | -0.458270 |
| 75 | 7  | 0 | -3.713245 | 0.994556  | -1.100734 |
| 76 | 1  | 0 | -3.471757 | 1.092679  | -2.071701 |
| 77 | 1  | 0 | -1.033251 | -1.161489 | 2.679585  |
| 78 | 1  | 0 | -1.026383 | 0.462211  | 2.022008  |
| 79 | 1  | 0 | -3.504930 | -1.324954 | 2.348526  |
| 80 | 1  | 0 | -3.124118 | 0.184486  | 3.156650  |
| 81 | 6  | 0 | -5.731924 | 2.494175  | -0.960356 |
| 82 | 6  | 0 | -5.685989 | 1.770634  | 1.799217  |
| 83 | 6  | 0 | -6.654230 | 2.616877  | 1.293458  |
| 84 | 6  | 0 | -6.673072 | 2.973428  | -0.077998 |
| 85 | 8  | 0 | -7.653755 | 3.176799  | 2.029751  |
| 86 | 6  | 0 | -7.677288 | 2.882897  | 3.412629  |
| 87 | 1  | 0 | -6.758916 | 3.219838  | 3.901043  |
| 88 | 1  | 0 | -8.526683 | 3.423379  | 3.821455  |
| 89 | 1  | 0 | -5.657566 | 1.492666  | 2.843023  |
| 90 | 1  | 0 | -5.753660 | 2.779702  | -2.004624 |
| 91 | 1  | 0 | -7.455890 | 3.643844  | -0.405738 |
| 92 | 1  | 0 | -7.808602 | 1.811037  | 3.584947  |

### trans-endo-c-TS-Re

Standard orientation:

| Center Number | Atomic Number | Atomic Type | Coordinates (Angstroms) |           |           |
|---------------|---------------|-------------|-------------------------|-----------|-----------|
|               |               |             | X                       | Y         | Z         |
| 1             | 6             | 0           | -2.658904               | 4.325233  | 0.923958  |
| 2             | 6             | 0           | -3.735881               | 4.165889  | 0.014097  |
| 3             | 6             | 0           | -3.996904               | 2.873451  | -0.519062 |
| 4             | 6             | 0           | -3.189317               | 1.754340  | -0.129910 |
| 5             | 6             | 0           | -1.871416               | 3.263795  | 1.258723  |
| 6             | 6             | 0           | -2.107492               | 1.965449  | 0.720027  |
| 7             | 6             | 0           | -3.600990               | 0.390195  | -0.595479 |
| 8             | 6             | 0           | -4.794062               | -0.184471 | -0.041047 |
| 9             | 6             | 0           | -5.308770               | -1.408812 | -0.552828 |
| 10            | 6             | 0           | -4.619260               | -2.047017 | -1.617919 |
| 11            | 6             | 0           | -2.912828               | -0.310192 | -1.586296 |
| 12            | 6             | 0           | -3.461136               | -1.520193 | -2.108147 |
| 13            | 6             | 0           | -4.545466               | 5.263794  | -0.366872 |
| 14            | 6             | 0           | -5.581088               | 5.103115  | -1.250387 |
| 15            | 6             | 0           | -5.839985               | 3.824185  | -1.791393 |
| 16            | 6             | 0           | -5.074223               | 2.742337  | -1.436844 |

Imaginary frequency: -431.4868 cm<sup>-1</sup>  
 Electronic energy  $E = -4188.774567$  a.u.  
 Enthalpy  $H = -4188.727645$  a.u.  
 Entropy  $S = 269.085$  cal/mol/K  
 Gibbs free energy  $G = -4188.855496$  a.u.  
 Total free energy in solution  $E_{\text{sol}} = -4190.36584$  a.u.

|    |    |   |           |           |           |
|----|----|---|-----------|-----------|-----------|
| 17 | 6  | 0 | -5.481630 | 0.419601  | 1.047034  |
| 18 | 6  | 0 | -6.604586 | -0.158517 | 1.584350  |
| 19 | 6  | 0 | -7.115719 | -1.368868 | 1.064230  |
| 20 | 6  | 0 | -6.475241 | -1.976771 | 0.015505  |
| 21 | 1  | 0 | -2.467579 | 5.307276  | 1.342058  |
| 22 | 1  | 0 | -1.037344 | 3.367119  | 1.941572  |
| 23 | 1  | 0 | -4.325296 | 6.237790  | 0.056044  |
| 24 | 1  | 0 | -6.194580 | 5.947739  | -1.537321 |
| 25 | 1  | 0 | -6.650801 | 3.696065  | -2.497825 |
| 26 | 1  | 0 | -5.278380 | 1.771164  | -1.866804 |
| 27 | 1  | 0 | -5.096170 | 1.343379  | 1.456503  |
| 28 | 1  | 0 | -7.104788 | 0.319584  | 2.417380  |
| 29 | 1  | 0 | -8.005517 | -1.810658 | 1.494298  |
| 30 | 1  | 0 | -6.848463 | -2.908219 | -0.395399 |
| 31 | 1  | 0 | -5.019238 | -2.970112 | -2.022029 |
| 32 | 1  | 0 | -2.907794 | -2.005483 | -2.902547 |
| 33 | 8  | 0 | -1.713278 | 0.083344  | -2.059118 |
| 34 | 8  | 0 | -1.245420 | 0.992883  | 1.076077  |
| 35 | 30 | 0 | -0.749377 | 0.099142  | -0.464702 |
| 36 | 6  | 0 | 3.282592  | 0.352871  | -0.729242 |
| 37 | 7  | 0 | 1.154188  | -0.676007 | -0.346050 |
| 38 | 6  | 0 | 2.116877  | -0.336045 | -1.247354 |
| 39 | 6  | 0 | 3.320938  | 0.910988  | 0.530912  |
| 40 | 6  | 0 | 1.584328  | -0.685685 | 1.077851  |
| 41 | 6  | 0 | 2.193490  | 0.654269  | 1.475461  |
| 42 | 6  | 0 | 4.511683  | 1.690695  | 0.600861  |
| 43 | 6  | 0 | 5.152082  | 1.558106  | -0.653209 |
| 44 | 7  | 0 | 4.371416  | 0.768647  | -1.463200 |
| 45 | 1  | 0 | 4.645896  | 0.375715  | -2.352108 |
| 46 | 1  | 0 | 2.338965  | -1.463262 | 1.217669  |
| 47 | 1  | 0 | 0.704166  | -0.911090 | 1.680278  |
| 48 | 1  | 0 | 2.541033  | 0.581316  | 2.507899  |
| 49 | 1  | 0 | 1.431806  | 1.440380  | 1.438357  |
| 50 | 6  | 0 | 5.090968  | 2.480381  | 1.615643  |
| 51 | 6  | 0 | 6.298051  | 3.095027  | 1.347180  |
| 52 | 6  | 0 | 6.936271  | 2.938980  | 0.090217  |
| 53 | 6  | 0 | 6.381007  | 2.180717  | -0.914044 |
| 54 | 8  | 0 | 6.977325  | 3.884144  | 2.224160  |
| 55 | 6  | 0 | 6.383671  | 4.096509  | 3.490325  |
| 56 | 1  | 0 | 4.592756  | 2.586963  | 2.568377  |
| 57 | 1  | 0 | 7.879805  | 3.448204  | -0.052125 |
| 58 | 1  | 0 | 6.872908  | 2.080288  | -1.873113 |
| 59 | 1  | 0 | 6.268948  | 3.154275  | 4.033154  |
| 60 | 1  | 0 | 7.059635  | 4.750157  | 4.034709  |
| 61 | 1  | 0 | 5.408009  | 4.579395  | 3.389988  |
| 62 | 6  | 0 | 1.672750  | 0.021165  | -2.645233 |
| 63 | 1  | 0 | 1.426490  | 1.087187  | -2.653575 |
| 64 | 1  | 0 | 2.474014  | -0.152888 | -3.363008 |
| 65 | 1  | 0 | 0.775244  | -0.516758 | -2.951511 |
| 66 | 6  | 0 | 1.019197  | -3.992190 | 1.045262  |
| 67 | 6  | 0 | -0.314461 | -3.719658 | 1.626192  |
| 68 | 6  | 0 | 1.303660  | -3.286210 | -0.211888 |
| 69 | 6  | 0 | 0.381912  | -2.338630 | -0.724995 |
| 70 | 6  | 0 | -1.188888 | -2.825728 | 1.014895  |
| 71 | 8  | 0 | -0.862440 | -2.194568 | -0.180782 |
| 72 | 8  | 0 | 1.825916  | -4.740622 | 1.573242  |
| 73 | 6  | 0 | 2.603679  | -3.235060 | -0.707850 |
| 74 | 6  | 0 | 2.943229  | -2.455407 | -1.805357 |
| 75 | 1  | 0 | 0.317347  | -2.165100 | -1.790651 |
| 76 | 1  | 0 | 3.375543  | -3.711560 | -0.113519 |
| 77 | 6  | 0 | 4.330132  | -2.169390 | -2.180715 |
| 78 | 8  | 0 | 4.637204  | -1.543143 | -3.184032 |

|    |   |   |           |           |           |
|----|---|---|-----------|-----------|-----------|
| 79 | 8 | 0 | 5.223158  | -2.576599 | -1.275074 |
| 80 | 6 | 0 | 6.584230  | -2.211296 | -1.542451 |
| 81 | 1 | 0 | 7.171855  | -2.705159 | -0.775601 |
| 82 | 1 | 0 | 6.697608  | -1.129968 | -1.468905 |
| 83 | 1 | 0 | 6.876422  | -2.545139 | -2.535263 |
| 84 | 6 | 0 | -0.718848 | -4.333048 | 2.815821  |
| 85 | 6 | 0 | -1.962436 | -4.053758 | 3.358223  |
| 86 | 6 | 0 | -2.816285 | -3.150074 | 2.717377  |
| 87 | 6 | 0 | -2.437449 | -2.525300 | 1.537171  |
| 88 | 1 | 0 | -0.028643 | -5.022612 | 3.283722  |
| 89 | 1 | 0 | -2.272929 | -4.531588 | 4.277692  |
| 90 | 1 | 0 | -3.788814 | -2.926270 | 3.136063  |
| 91 | 1 | 0 | -3.079328 | -1.819137 | 1.026030  |
| 92 | 1 | 0 | 2.244695  | -2.317860 | -2.617210 |

**trans-endo-c-TS-Si**

Standard orientation:

Imaginary frequency: -457.6268 cm<sup>-1</sup>

Electronic energy  $E = -4188.768195$  a.u.

Enthalpy  $H = -4188.721140$  a.u.

Entropy  $S = 272.020$  cal/mol/K

Gibbs free energy  $G = -4188.850385$  a.u.

Total free energy in solution  $E_{\text{sol}} = -4190.35896$  a.u.

| Center Number | Atomic Number | Atomic Type | Coordinates (Angstroms) |           |           |
|---------------|---------------|-------------|-------------------------|-----------|-----------|
|               |               |             | X                       | Y         | Z         |
| 1             | 6             | 0           | -5.036021               | 1.970477  | 1.923330  |
| 2             | 6             | 0           | -5.873718               | 1.274541  | 1.013899  |
| 3             | 6             | 0           | -5.331555               | 0.184126  | 0.278479  |
| 4             | 6             | 0           | -3.962372               | -0.203778 | 0.460403  |
| 5             | 6             | 0           | -3.723787               | 1.622820  | 2.062423  |
| 6             | 6             | 0           | -3.157542               | 0.550372  | 1.311377  |
| 7             | 6             | 0           | -3.493116               | -1.466628 | -0.201785 |
| 8             | 6             | 0           | -4.007146               | -2.713433 | 0.287722  |
| 9             | 6             | 0           | -3.741032               | -3.924706 | -0.408716 |
| 10            | 6             | 0           | -2.957867               | -3.875167 | -1.590651 |
| 11            | 6             | 0           | -2.660370               | -1.474778 | -1.319705 |
| 12            | 6             | 0           | -2.433483               | -2.693330 | -2.025682 |
| 13            | 6             | 0           | -7.228967               | 1.644598  | 0.834394  |
| 14            | 6             | 0           | -8.032738               | 0.969203  | -0.046707 |
| 15            | 6             | 0           | -7.498779               | -0.108106 | -0.788018 |
| 16            | 6             | 0           | -6.190657               | -0.491401 | -0.630201 |
| 17            | 6             | 0           | -4.791324               | -2.789885 | 1.471023  |
| 18            | 6             | 0           | -5.276585               | -3.990665 | 1.923206  |
| 19            | 6             | 0           | -5.016136               | -5.188655 | 1.220954  |
| 20            | 6             | 0           | -4.261054               | -5.149294 | 0.078079  |
| 21            | 1             | 0           | -5.455882               | 2.785119  | 2.503357  |
| 22            | 1             | 0           | -3.062326               | 2.147126  | 2.741305  |
| 23            | 1             | 0           | -7.616990               | 2.477034  | 1.411149  |
| 24            | 1             | 0           | -9.067593               | 1.258242  | -0.178838 |
| 25            | 1             | 0           | -8.128775               | -0.637456 | -1.492033 |
| 26            | 1             | 0           | -5.793587               | -1.312764 | -1.210647 |
| 27            | 1             | 0           | -4.993208               | -1.881379 | 2.021717  |
| 28            | 1             | 0           | -5.865816               | -4.020492 | 2.831346  |
| 29            | 1             | 0           | -5.409237               | -6.128388 | 1.587596  |
| 30            | 1             | 0           | -4.045943               | -6.057092 | -0.474659 |
| 31            | 1             | 0           | -2.779274               | -4.792892 | -2.139927 |
| 32            | 1             | 0           | -1.833264               | -2.637371 | -2.925630 |
| 33            | 8             | 0           | -2.037897               | -0.368493 | -1.779029 |
| 34            | 8             | 0           | -1.836180               | 0.331224  | 1.461769  |
| 35            | 30            | 0           | -1.169569               | 0.257720  | -0.259295 |
| 36            | 6             | 0           | 2.842674                | -1.053895 | -0.173677 |
| 37            | 7             | 0           | 0.927021                | 0.377349  | -0.363682 |
| 38            | 6             | 0           | 1.680311                | -0.622418 | -0.906592 |
| 39            | 6             | 0           | 3.430262                | -0.345914 | 0.851187  |
| 40            | 6             | 0           | 1.326928                | 0.886330  | 0.987530  |

|    |   |   |           |           |           |
|----|---|---|-----------|-----------|-----------|
| 41 | 6 | 0 | 2.825049  | 0.944035  | 1.298259  |
| 42 | 6 | 0 | 4.601413  | -1.058962 | 1.229002  |
| 43 | 6 | 0 | 4.667590  | -2.197743 | 0.390587  |
| 44 | 7 | 0 | 3.580658  | -2.184676 | -0.448719 |
| 45 | 1 | 0 | 3.484487  | -2.745567 | -1.279213 |
| 46 | 1 | 0 | 0.848735  | 0.203387  | 1.693243  |
| 47 | 1 | 0 | 0.853967  | 1.857116  | 1.122262  |
| 48 | 1 | 0 | 2.928514  | 1.079845  | 2.377603  |
| 49 | 1 | 0 | 3.313338  | 1.797295  | 0.820665  |
| 50 | 6 | 0 | 5.599209  | -0.833419 | 2.200852  |
| 51 | 6 | 0 | 6.630108  | -1.746875 | 2.294555  |
| 52 | 6 | 0 | 6.683757  | -2.881913 | 1.444592  |
| 53 | 6 | 0 | 5.714878  | -3.123976 | 0.498936  |
| 54 | 8 | 0 | 7.663124  | -1.660840 | 3.176098  |
| 55 | 6 | 0 | 7.655556  | -0.563333 | 4.068755  |
| 56 | 1 | 0 | 5.542964  | 0.035928  | 2.839749  |
| 57 | 1 | 0 | 7.517582  | -3.558458 | 1.574608  |
| 58 | 1 | 0 | 5.762496  | -3.999715 | -0.135649 |
| 59 | 1 | 0 | 6.760685  | -0.575493 | 4.696518  |
| 60 | 1 | 0 | 8.539298  | -0.674935 | 4.691037  |
| 61 | 1 | 0 | 7.706603  | 0.384509  | 3.526208  |
| 62 | 6 | 0 | 1.006052  | -1.564962 | -1.864817 |
| 63 | 1 | 0 | 1.715497  | -1.984385 | -2.578152 |
| 64 | 1 | 0 | 0.559613  | -2.377540 | -1.280303 |
| 65 | 1 | 0 | 0.185313  | -1.079168 | -2.393994 |
| 66 | 6 | 0 | 1.970205  | 3.705597  | -0.794434 |
| 67 | 6 | 0 | 0.711592  | 4.213999  | -0.196413 |
| 68 | 6 | 0 | 1.833338  | 2.469921  | -1.563177 |
| 69 | 6 | 0 | 0.620490  | 1.726641  | -1.515260 |
| 70 | 6 | 0 | -0.474188 | 3.492543  | -0.307299 |
| 71 | 8 | 0 | -0.529662 | 2.293187  | -1.008461 |
| 72 | 8 | 0 | 3.040291  | 4.276394  | -0.639461 |
| 73 | 6 | 0 | 2.957711  | 1.795253  | -2.036402 |
| 74 | 6 | 0 | 2.869867  | 0.550579  | -2.633333 |
| 75 | 1 | 0 | 0.340174  | 1.112579  | -2.362099 |
| 76 | 1 | 0 | 3.926293  | 2.210577  | -1.781189 |
| 77 | 6 | 0 | 4.032604  | -0.318168 | -2.845001 |
| 78 | 8 | 0 | 3.962389  | -1.421944 | -3.357610 |
| 79 | 1 | 0 | 1.999224  | 0.250988  | -3.197484 |
| 80 | 8 | 0 | 5.165836  | 0.186240  | -2.343525 |
| 81 | 6 | 0 | 6.318846  | -0.656512 | -2.467905 |
| 82 | 1 | 0 | 6.184154  | -1.559069 | -1.874324 |
| 83 | 1 | 0 | 6.477730  | -0.922759 | -3.510813 |
| 84 | 1 | 0 | 7.147907  | -0.071012 | -2.083812 |
| 85 | 6 | 0 | 0.693851  | 5.413414  | 0.520568  |
| 86 | 6 | 0 | -0.480625 | 5.867342  | 1.098475  |
| 87 | 6 | 0 | -1.653608 | 5.118181  | 0.970131  |
| 88 | 6 | 0 | -1.662042 | 3.921793  | 0.264784  |
| 89 | 1 | 0 | 1.624061  | 5.959811  | 0.603159  |
| 90 | 1 | 0 | -0.490400 | 6.797161  | 1.650888  |
| 91 | 1 | 0 | -2.572300 | 5.465223  | 1.424753  |
| 92 | 1 | 0 | -2.559383 | 3.324462  | 0.162655  |

**trans-exo-c-TS-Re**

Standard orientation:

Imaginary frequency: -425.0754 cm<sup>-1</sup>  
 Electronic energy  $E = -4188.764449$  a.u.  
 Enthalpy  $H = -4188.717556$  a.u.

| Center<br>Number | Atomic<br>Number | Atomic<br>Type | Coordinates (Angstroms) |           |           | Entropy $S = 268.712\text{cal/mol/K}$<br>Gibbs free energy $G = -4188.845230$ a.u.<br>Total free energy in solution $E_{\text{sol}} = -4190.35519$ a.u. |
|------------------|------------------|----------------|-------------------------|-----------|-----------|---------------------------------------------------------------------------------------------------------------------------------------------------------|
|                  |                  |                | X                       | Y         | Z         |                                                                                                                                                         |
| 1                | 6                | 0              | 3.052941                | -0.041282 | -0.059230 |                                                                                                                                                         |
| 2                | 7                | 0              | 1.233300                | -1.232815 | 0.974075  |                                                                                                                                                         |
| 3                | 6                | 0              | 2.127633                | -1.162762 | -0.071127 |                                                                                                                                                         |
| 4                | 6                | 0              | 2.839500                | 1.077575  | 0.712879  |                                                                                                                                                         |
| 5                | 6                | 0              | 1.567681                | -0.380007 | 2.152019  |                                                                                                                                                         |
| 6                | 6                | 0              | 1.767610                | 1.071426  | 1.745095  |                                                                                                                                                         |
| 7                | 6                | 0              | 3.745272                | 2.083704  | 0.257215  |                                                                                                                                                         |
| 8                | 6                | 0              | 4.495454                | 1.495423  | -0.787616 |                                                                                                                                                         |
| 9                | 7                | 0              | 4.022209                | 0.217169  | -1.016212 |                                                                                                                                                         |
| 10               | 1                | 0              | 4.633016                | -0.508887 | -1.358116 |                                                                                                                                                         |
| 11               | 1                | 0              | 2.500411                | -0.739580 | 2.601678  |                                                                                                                                                         |
| 12               | 1                | 0              | 0.748246                | -0.486667 | 2.861341  |                                                                                                                                                         |
| 13               | 1                | 0              | 2.055425                | 1.647953  | 2.626810  |                                                                                                                                                         |
| 14               | 1                | 0              | 0.837844                | 1.511985  | 1.369045  |                                                                                                                                                         |
| 15               | 6                | 0              | 3.990576                | 3.405958  | 0.644343  |                                                                                                                                                         |
| 16               | 6                | 0              | 4.998847                | 4.105585  | 0.002977  |                                                                                                                                                         |
| 17               | 6                | 0              | 5.763906                | 3.499111  | -1.018269 |                                                                                                                                                         |
| 18               | 6                | 0              | 5.519636                | 2.196481  | -1.420616 |                                                                                                                                                         |
| 19               | 8                | 0              | 5.196868                | 5.387680  | 0.424268  |                                                                                                                                                         |
| 20               | 6                | 0              | 6.172327                | 6.161680  | -0.245912 |                                                                                                                                                         |
| 21               | 1                | 0              | 3.421621                | 3.894874  | 1.423719  |                                                                                                                                                         |
| 22               | 1                | 0              | 6.552892                | 4.052279  | -1.506097 |                                                                                                                                                         |
| 23               | 1                | 0              | 6.106154                | 1.747026  | -2.211241 |                                                                                                                                                         |
| 24               | 1                | 0              | 5.943795                | 6.251827  | -1.311230 |                                                                                                                                                         |
| 25               | 1                | 0              | 6.139846                | 7.145539  | 0.214627  |                                                                                                                                                         |
| 26               | 1                | 0              | 7.172226                | 5.737293  | -0.121556 |                                                                                                                                                         |
| 27               | 6                | 0              | 1.654667                | -1.655807 | -1.410439 |                                                                                                                                                         |
| 28               | 1                | 0              | 1.007497                | -0.885986 | -1.841743 |                                                                                                                                                         |
| 29               | 1                | 0              | 2.495020                | -1.837874 | -2.078473 |                                                                                                                                                         |
| 30               | 1                | 0              | 1.058273                | -2.561419 | -1.316437 |                                                                                                                                                         |
| 31               | 6                | 0              | -4.628019               | -1.107350 | -2.253288 |                                                                                                                                                         |
| 32               | 6                | 0              | -5.371280               | -0.268399 | -1.381556 |                                                                                                                                                         |
| 33               | 6                | 0              | -4.665419               | 0.606892  | -0.509034 |                                                                                                                                                         |
| 34               | 6                | 0              | -3.229991               | 0.634866  | -0.510970 |                                                                                                                                                         |
| 35               | 6                | 0              | -3.265261               | -1.120873 | -2.202977 |                                                                                                                                                         |
| 36               | 6                | 0              | -2.545618               | -0.286991 | -1.297929 |                                                                                                                                                         |
| 37               | 6                | 0              | -2.543242               | 1.720456  | 0.259092  |                                                                                                                                                         |
| 38               | 6                | 0              | -2.702840               | 3.071863  | -0.198454 |                                                                                                                                                         |
| 39               | 6                | 0              | -2.219019               | 4.158350  | 0.582299  |                                                                                                                                                         |
| 40               | 6                | 0              | -1.570655               | 3.880155  | 1.812647  |                                                                                                                                                         |
| 41               | 6                | 0              | -1.824338               | 1.487860  | 1.427550  |                                                                                                                                                         |
| 42               | 6                | 0              | -1.376833               | 2.591227  | 2.214535  |                                                                                                                                                         |
| 43               | 6                | 0              | -6.787773               | -0.286917 | -1.370419 |                                                                                                                                                         |
| 44               | 6                | 0              | -7.497107               | 0.522949  | -0.521621 |                                                                                                                                                         |
| 45               | 6                | 0              | -6.803731               | 1.387676  | 0.353907  |                                                                                                                                                         |
| 46               | 6                | 0              | -5.432011               | 1.433031  | 0.357908  |                                                                                                                                                         |
| 47               | 6                | 0              | -3.338079               | 3.379960  | -1.432596 |                                                                                                                                                         |
| 48               | 6                | 0              | -3.485100               | 4.678440  | -1.851283 |                                                                                                                                                         |
| 49               | 6                | 0              | -3.013089               | 5.752035  | -1.063887 |                                                                                                                                                         |
| 50               | 6                | 0              | -2.390717               | 5.488917  | 0.128364  |                                                                                                                                                         |
| 51               | 1                | 0              | -5.161936               | -1.747284 | -2.947721 |                                                                                                                                                         |
| 52               | 1                | 0              | -2.677660               | -1.776987 | -2.833111 |                                                                                                                                                         |
| 53               | 1                | 0              | -7.299939               | -0.958774 | -2.050588 |                                                                                                                                                         |
| 54               | 1                | 0              | -8.579512               | 0.501574  | -0.518593 |                                                                                                                                                         |
| 55               | 1                | 0              | -7.361147               | 2.022975  | 1.031075  |                                                                                                                                                         |
| 56               | 1                | 0              | -4.913965               | 2.097086  | 1.036486  |                                                                                                                                                         |
| 57               | 1                | 0              | -3.696585               | 2.569421  | -2.052107 |                                                                                                                                                         |
| 58               | 1                | 0              | -3.966918               | 4.881691  | -2.799613 |                                                                                                                                                         |
| 59               | 1                | 0              | -3.139188               | 6.771687  | -1.404953 |                                                                                                                                                         |



|    |    |   |           |           |           |
|----|----|---|-----------|-----------|-----------|
| 60 | 1  | 0 | -2.014463 | 6.296567  | 0.746423  |
| 61 | 1  | 0 | -1.226384 | 4.707299  | 2.423515  |
| 62 | 1  | 0 | -0.877166 | 2.355538  | 3.146627  |
| 63 | 8  | 0 | -1.530686 | 0.258879  | 1.884604  |
| 64 | 8  | 0 | -1.211109 | -0.450485 | -1.247328 |
| 65 | 30 | 0 | -0.744440 | -0.756304 | 0.523916  |
| 66 | 6  | 0 | 0.238229  | -4.678632 | 0.173914  |
| 67 | 6  | 0 | -1.104503 | -4.098874 | 0.410801  |
| 68 | 6  | 0 | 1.315437  | -3.930816 | 0.830857  |
| 69 | 6  | 0 | 1.000514  | -2.908099 | 1.770395  |
| 70 | 6  | 0 | -1.286121 | -3.135143 | 1.407817  |
| 71 | 8  | 0 | -0.257356 | -2.810665 | 2.277693  |
| 72 | 8  | 0 | 0.426693  | -5.613292 | -0.586616 |
| 73 | 6  | 0 | 2.570659  | -3.919482 | 0.243413  |
| 74 | 6  | 0 | 3.522209  | -2.933227 | 0.476046  |
| 75 | 1  | 0 | 1.719081  | -2.713236 | 2.556405  |
| 76 | 1  | 0 | 2.714850  | -4.600140 | -0.587295 |
| 77 | 6  | 0 | 4.728420  | -2.858548 | -0.360715 |
| 78 | 8  | 0 | 5.637761  | -2.069931 | -0.186010 |
| 79 | 1  | 0 | 3.616960  | -2.410263 | 1.418451  |
| 80 | 8  | 0 | 4.703594  | -3.708089 | -1.404591 |
| 81 | 6  | 0 | 5.859507  | -3.663558 | -2.249962 |
| 82 | 1  | 0 | 5.933636  | -2.693140 | -2.739510 |
| 83 | 1  | 0 | 6.760255  | -3.837551 | -1.665269 |
| 84 | 1  | 0 | 5.712677  | -4.449553 | -2.983508 |
| 85 | 6  | 0 | -2.186127 | -4.433606 | -0.403071 |
| 86 | 6  | 0 | -3.412185 | -3.807618 | -0.228574 |
| 87 | 6  | 0 | -3.570693 | -2.841056 | 0.764724  |
| 88 | 6  | 0 | -2.514751 | -2.510655 | 1.611306  |
| 89 | 1  | 0 | -2.023937 | -5.176353 | -1.173128 |
| 90 | 1  | 0 | -4.241751 | -4.045492 | -0.879927 |
| 91 | 1  | 0 | -4.515223 | -2.324606 | 0.874426  |
| 92 | 1  | 0 | -2.614579 | -1.764459 | 2.387552  |

**trans-exo-c-TS-Si**

Standard orientation:

Imaginary frequency: -464.5850 cm<sup>-1</sup>

Electronic energy  $E = -4188.764743$  a.u.

Enthalpy  $H = -4188.717889$  a.u.

Entropy  $S = 266.575$  cal/mol/K

Gibbs free energy  $G = -4188.844547$  a.u.

Total free energy in solution  $E_{\text{sol}} = -4190.35737$  a.u.

| Center Number | Atomic Number | Atomic Type | Coordinates (Angstroms) |           |           |
|---------------|---------------|-------------|-------------------------|-----------|-----------|
|               |               |             | X                       | Y         | Z         |
| 1             | 6             | 0           | -0.093448               | -4.109168 | 0.780408  |
| 2             | 6             | 0           | -1.303680               | -3.680420 | 0.038334  |
| 3             | 6             | 0           | 1.154231                | -3.578945 | 0.209361  |
| 4             | 6             | 0           | 1.130338                | -2.938429 | -1.057377 |
| 5             | 6             | 0           | -1.173346               | -3.074012 | -1.216833 |
| 6             | 8             | 0           | 0.048426                | -3.043073 | -1.865290 |
| 7             | 8             | 0           | -0.140860               | -4.742883 | 1.819447  |
| 8             | 6             | 0           | 2.236699                | -3.315790 | 1.038826  |
| 9             | 6             | 0           | 3.250541                | -2.454057 | 0.635874  |
| 10            | 1             | 0           | 2.028799                | -2.920594 | -1.658512 |
| 11            | 1             | 0           | 2.167320                | -3.634535 | 2.072780  |
| 12            | 6             | 0           | 4.366647                | -2.058571 | 1.516020  |
| 13            | 8             | 0           | 5.445899                | -1.696731 | 1.111674  |
| 14            | 1             | 0           | 3.528295                | -2.370293 | -0.404768 |
| 15            | 8             | 0           | 4.040183                | -2.097323 | 2.824820  |
| 16            | 6             | 0           | 5.106963                | -1.719546 | 3.706174  |
| 17            | 1             | 0           | 5.952189                | -2.393380 | 3.581405  |
| 18            | 1             | 0           | 4.697965                | -1.792331 | 4.708914  |
| 19            | 1             | 0           | 5.430092                | -0.703157 | 3.485650  |
| 20            | 6             | 0           | -2.566929               | -3.730444 | 0.624397  |
| 21            | 6             | 0           | -3.664078               | -3.177220 | -0.022170 |

|    |    |   |           |           |           |
|----|----|---|-----------|-----------|-----------|
| 22 | 6  | 0 | -3.509948 | -2.554579 | -1.259575 |
| 23 | 6  | 0 | -2.261708 | -2.513506 | -1.879355 |
| 24 | 1  | 0 | -2.647224 | -4.175210 | 1.607133  |
| 25 | 1  | 0 | -4.634706 | -3.186917 | 0.454122  |
| 26 | 1  | 0 | -4.352121 | -2.076953 | -1.743294 |
| 27 | 1  | 0 | -2.122318 | -2.052428 | -2.848472 |
| 28 | 6  | 0 | -1.974534 | 2.076712  | 3.354184  |
| 29 | 6  | 0 | -2.627152 | 3.041938  | 2.546029  |
| 30 | 6  | 0 | -3.057551 | 2.665465  | 1.242827  |
| 31 | 6  | 0 | -2.840579 | 1.331408  | 0.764384  |
| 32 | 6  | 0 | -1.730167 | 0.823392  | 2.873540  |
| 33 | 6  | 0 | -2.126239 | 0.437061  | 1.556965  |
| 34 | 6  | 0 | -3.450300 | 0.933783  | -0.543464 |
| 35 | 6  | 0 | -4.876985 | 0.832100  | -0.638087 |
| 36 | 6  | 0 | -5.502830 | 0.603241  | -1.896792 |
| 37 | 6  | 0 | -4.686976 | 0.479465  | -3.051712 |
| 38 | 6  | 0 | -2.682562 | 0.711554  | -1.683828 |
| 39 | 6  | 0 | -3.326742 | 0.526139  | -2.944114 |
| 40 | 8  | 0 | -1.800871 | -0.803332 | 1.163793  |
| 41 | 8  | 0 | -1.344771 | 0.633286  | -1.661293 |
| 42 | 1  | 0 | -1.672952 | 2.351802  | 4.358947  |
| 43 | 1  | 0 | -1.237794 | 0.070048  | 3.476866  |
| 44 | 6  | 0 | -2.857365 | 4.358787  | 3.014403  |
| 45 | 6  | 0 | -3.700816 | 3.655195  | 0.450095  |
| 46 | 6  | 0 | -6.914275 | 0.502708  | -1.977249 |
| 47 | 6  | 0 | -5.716013 | 0.938276  | 0.505629  |
| 48 | 1  | 0 | -5.160882 | 0.339475  | -4.017156 |
| 49 | 1  | 0 | -2.684789 | 0.423037  | -3.811130 |
| 50 | 6  | 0 | -3.485797 | 5.287740  | 2.226732  |
| 51 | 6  | 0 | -3.905233 | 4.925224  | 0.926997  |
| 52 | 6  | 0 | -7.079323 | 0.828653  | 0.398883  |
| 53 | 6  | 0 | -7.693850 | 0.613543  | -0.855614 |
| 54 | 1  | 0 | -5.258426 | 1.098487  | 1.472243  |
| 55 | 1  | 0 | -7.692637 | 0.907994  | 1.288081  |
| 56 | 1  | 0 | -8.771438 | 0.535021  | -0.925290 |
| 57 | 1  | 0 | -7.364648 | 0.334932  | -2.949499 |
| 58 | 1  | 0 | -2.522418 | 4.616303  | 4.013199  |
| 59 | 1  | 0 | -3.657229 | 6.292459  | 2.591753  |
| 60 | 1  | 0 | -4.392201 | 5.659933  | 0.297707  |
| 61 | 1  | 0 | -4.019697 | 3.395033  | -0.549844 |
| 62 | 30 | 0 | -0.872888 | -0.717707 | -0.452013 |
| 63 | 6  | 0 | 3.030180  | 0.262473  | 0.101158  |
| 64 | 7  | 0 | 1.167530  | -1.042054 | -0.710115 |
| 65 | 6  | 0 | 1.949983  | -0.670934 | 0.362238  |
| 66 | 6  | 0 | 1.279970  | -0.617089 | 1.707453  |
| 67 | 6  | 0 | 3.601237  | 0.455992  | -1.131922 |
| 68 | 6  | 0 | 1.524272  | -0.443199 | -2.033103 |
| 69 | 6  | 0 | 3.021225  | -0.266046 | -2.304397 |
| 70 | 1  | 0 | 2.009841  | -0.684785 | 2.513677  |
| 71 | 1  | 0 | 0.735018  | 0.330873  | 1.787339  |
| 72 | 1  | 0 | 0.545779  | -1.412225 | 1.825333  |
| 73 | 6  | 0 | 4.688830  | 1.358920  | -0.952875 |
| 74 | 6  | 0 | 4.718503  | 1.680145  | 0.423940  |
| 75 | 7  | 0 | 3.710572  | 0.986219  | 1.053232  |
| 76 | 1  | 0 | 3.429310  | 1.107475  | 2.009982  |
| 77 | 1  | 0 | 1.045534  | -1.058820 | -2.794588 |
| 78 | 1  | 0 | 1.036836  | 0.533297  | -2.062343 |
| 79 | 1  | 0 | 3.526114  | -1.224173 | -2.474770 |
| 80 | 1  | 0 | 3.129509  | 0.310447  | -3.225643 |
| 81 | 6  | 0 | 5.659407  | 2.576619  | 0.944730  |
| 82 | 6  | 0 | 5.628101  | 1.931098  | -1.834490 |
| 83 | 6  | 0 | 6.557872  | 2.807522  | -1.310313 |

|    |   |   |          |          |           |
|----|---|---|----------|----------|-----------|
| 84 | 6 | 0 | 6.568036 | 3.126260 | 0.070598  |
| 85 | 8 | 0 | 7.524845 | 3.435105 | -2.035616 |
| 86 | 6 | 0 | 7.568089 | 3.161360 | -3.421875 |
| 87 | 1 | 0 | 6.637464 | 3.462437 | -3.910804 |
| 88 | 1 | 0 | 8.393495 | 3.745754 | -3.819398 |
| 89 | 1 | 0 | 5.607365 | 1.679015 | -2.884941 |
| 90 | 1 | 0 | 5.679698 | 2.828559 | 1.997296  |
| 91 | 1 | 0 | 7.322643 | 3.821127 | 0.413237  |
| 92 | 1 | 0 | 7.749116 | 2.099065 | -3.607135 |

### 5.3.2 models of activation of ester carbonyl group of diene 2a

*trans*-2a as diene

#### (R)-5a-trans-2a

Standard orientation:

Imaginary frequency: none

Electronic energy  $E = -2698.517722$  a.u.

Enthalpy  $H = -2698.500052$  a.u.

Entropy  $S = 131.696$  cal/mol/K

Gibbs free energy  $G = -2698.562626$  a.u.

Total free energy in solution  $E_{\text{sol}} = -2699.25145$  a.u.

| Center Number | Atomic Number | Atomic Type | Coordinates (Angstroms) |           |           |
|---------------|---------------|-------------|-------------------------|-----------|-----------|
|               |               |             | X                       | Y         | Z         |
| 1             | 6             | 0           | -3.827666               | -2.654181 | -1.708326 |
| 2             | 6             | 0           | -5.188057               | -2.693902 | -1.785758 |
| 3             | 6             | 0           | -5.981618               | -1.776316 | -1.049124 |
| 4             | 6             | 0           | -5.332915               | -0.798378 | -0.245790 |
| 5             | 6             | 0           | -3.901571               | -0.742674 | -0.196238 |
| 6             | 6             | 0           | -3.162461               | -1.688822 | -0.900082 |
| 7             | 6             | 0           | 6.291123                | 0.739887  | -0.560770 |
| 8             | 6             | 0           | 7.720321                | 0.396952  | -0.443132 |
| 9             | 6             | 0           | 5.374701                | -0.310173 | -0.076725 |
| 10            | 6             | 0           | 5.882090                | -1.483323 | 0.368560  |
| 11            | 6             | 0           | 8.107533                | -0.841623 | 0.062458  |
| 12            | 8             | 0           | 7.181258                | -1.778838 | 0.451301  |
| 13            | 8             | 0           | 5.896336                | 1.800283  | -1.015730 |
| 14            | 6             | 0           | 3.946215                | -0.036416 | -0.145039 |
| 15            | 6             | 0           | 2.971029                | -0.726171 | 0.467840  |
| 16            | 1             | 0           | 5.274096                | -2.316835 | 0.691960  |
| 17            | 1             | 0           | 3.689474                | 0.830135  | -0.743104 |
| 18            | 6             | 0           | 1.561806                | -0.375338 | 0.315410  |
| 19            | 8             | 0           | 0.689215                | -1.020954 | 0.920961  |
| 20            | 1             | 0           | 3.147713                | -1.567702 | 1.123820  |
| 21            | 8             | 0           | 1.308698                | 0.643319  | -0.463987 |
| 22            | 6             | 0           | -0.068370               | 1.077347  | -0.615767 |
| 23            | 1             | 0           | -0.652213               | 0.291867  | -1.093524 |
| 24            | 1             | 0           | -0.473804               | 1.344667  | 0.359586  |
| 25            | 1             | 0           | -0.015948               | 1.955981  | -1.248682 |
| 26            | 30            | 0           | -1.233432               | -1.387870 | 0.842387  |
| 27            | 8             | 0           | -2.352954               | -1.005325 | 2.288289  |
| 28            | 8             | 0           | -1.817304               | -1.745466 | -0.869375 |
| 29            | 6             | 0           | 8.711742                | 1.305403  | -0.831475 |
| 30            | 6             | 0           | 10.047673               | 0.971286  | -0.708705 |
| 31            | 6             | 0           | 10.411000               | -0.280917 | -0.195398 |
| 32            | 6             | 0           | 9.447148                | -1.196425 | 0.192394  |
| 33            | 1             | 0           | 8.390880                | 2.261801  | -1.222544 |
| 34            | 1             | 0           | 10.813815               | 1.673859  | -1.007545 |
| 35            | 1             | 0           | 11.457210               | -0.540344 | -0.099543 |
| 36            | 1             | 0           | 9.701732                | -2.169539 | 0.589098  |
| 37            | 6             | 0           | -3.263456               | 0.388785  | 0.553554  |

|    |   |   |           |           |           |
|----|---|---|-----------|-----------|-----------|
| 38 | 6 | 0 | -3.354647 | 1.713325  | 0.007596  |
| 39 | 6 | 0 | -2.898919 | 2.834354  | 0.756639  |
| 40 | 6 | 0 | -2.650065 | 0.212500  | 1.798645  |
| 41 | 6 | 0 | -2.238369 | 1.355264  | 2.554516  |
| 42 | 6 | 0 | -2.366990 | 2.618847  | 2.057265  |
| 43 | 1 | 0 | -5.682971 | -3.433901 | -2.404695 |
| 44 | 1 | 0 | -3.204369 | -3.353431 | -2.250601 |
| 45 | 6 | 0 | -7.395910 | -1.821776 | -1.100398 |
| 46 | 6 | 0 | -6.150294 | 0.099141  | 0.492703  |
| 47 | 6 | 0 | -3.866136 | 1.951054  | -1.297062 |
| 48 | 6 | 0 | -2.972175 | 4.133376  | 0.198132  |
| 49 | 1 | 0 | -2.047396 | 3.475746  | 2.640001  |
| 50 | 1 | 0 | -1.812650 | 1.164516  | 3.531572  |
| 51 | 6 | 0 | -3.917719 | 3.220851  | -1.816415 |
| 52 | 6 | 0 | -3.469844 | 4.329709  | -1.064582 |
| 53 | 6 | 0 | -8.157030 | -0.936649 | -0.381583 |
| 54 | 6 | 0 | -7.519301 | 0.030351  | 0.426227  |
| 55 | 1 | 0 | -7.864591 | -2.577189 | -1.721408 |
| 56 | 1 | 0 | -9.237941 | -0.979378 | -0.425452 |
| 57 | 1 | 0 | -8.117510 | 0.723564  | 1.004630  |
| 58 | 1 | 0 | -5.676885 | 0.837345  | 1.125751  |
| 59 | 1 | 0 | -4.209657 | 1.107910  | -1.881086 |
| 60 | 1 | 0 | -4.307450 | 3.373873  | -2.815073 |
| 61 | 1 | 0 | -3.520974 | 5.325825  | -1.485269 |
| 62 | 1 | 0 | -2.622806 | 4.971086  | 0.791418  |

### trans-endo-TS1-Re

Standard orientation:

| Center Number | Atomic Number | Atomic Type | Coordinates (Angstroms) |           |           |
|---------------|---------------|-------------|-------------------------|-----------|-----------|
|               |               |             | X                       | Y         | Z         |
| 1             | 6             | 0           | 1.427352                | 0.377510  | 0.804063  |
| 2             | 7             | 0           | 3.506399                | -0.706861 | 1.187784  |
| 3             | 6             | 0           | 2.213616                | -0.812677 | 1.079681  |
| 4             | 6             | 0           | 1.513654                | -2.105759 | 1.379250  |
| 5             | 6             | 0           | 1.990584                | 1.552144  | 0.397490  |
| 6             | 6             | 0           | 4.097070                | 0.641528  | 1.229471  |
| 7             | 6             | 0           | 3.474972                | 1.667248  | 0.277614  |
| 8             | 1             | 0           | 0.573282                | -2.220861 | 0.838495  |
| 9             | 1             | 0           | 2.150682                | -2.973145 | 1.220308  |
| 10            | 1             | 0           | 1.270555                | -2.091557 | 2.446906  |
| 11            | 6             | 0           | 0.929406                | 2.476334  | 0.119844  |
| 12            | 6             | 0           | -0.269958               | 1.804362  | 0.395630  |
| 13            | 7             | 0           | 0.012227                | 0.454189  | 0.729879  |
| 14            | 1             | 0           | -0.527802               | 0.064113  | 1.508795  |
| 15            | 1             | 0           | 3.955407                | 0.989348  | 2.257089  |
| 16            | 1             | 0           | 5.166193                | 0.546425  | 1.058249  |
| 17            | 1             | 0           | 3.814871                | 2.663481  | 0.568285  |
| 18            | 1             | 0           | 3.788747                | 1.507583  | -0.758048 |
| 19            | 6             | 0           | 0.926167                | 3.819452  | -0.294509 |
| 20            | 6             | 0           | -0.301721               | 4.454967  | -0.374707 |
| 21            | 6             | 0           | -1.499663               | 3.772025  | -0.057755 |
| 22            | 6             | 0           | -1.507392               | 2.447301  | 0.322376  |
| 23            | 1             | 0           | -2.430880               | 1.925084  | 0.529230  |
| 24            | 1             | 0           | 1.854292                | 4.323671  | -0.520051 |
| 25            | 1             | 0           | -2.424021               | 4.327503  | -0.136591 |
| 26            | 8             | 0           | -0.471452               | 5.749737  | -0.746297 |
| 27            | 6             | 0           | 0.692601                | 6.494523  | -1.051057 |
| 28            | 1             | 0           | 0.350830                | 7.491149  | -1.315493 |
| 29            | 1             | 0           | 1.358358                | 6.552647  | -0.185818 |

Imaginary frequency: -272.0706 cm<sup>-1</sup>

Electronic energy  $E = -4188.794797$  a.u.

Enthalpy  $H = -4188.747695$  a.u.

Entropy  $S = 271.649$  cal/mol/K

Gibbs free energy  $G = -4188.876764$  a.u.

Total free energy in solution  $E_{\text{sol}} = -4190.39004$  a.u.

|    |    |   |           |           |           |
|----|----|---|-----------|-----------|-----------|
| 30 | 1  | 0 | 1.229649  | 6.055302  | -1.895962 |
| 31 | 6  | 0 | 6.156128  | -0.581313 | -1.104523 |
| 32 | 6  | 0 | 7.152982  | -0.832002 | -0.034785 |
| 33 | 6  | 0 | 4.889940  | -1.271263 | -0.927026 |
| 34 | 6  | 0 | 4.608616  | -1.944651 | 0.297012  |
| 35 | 6  | 0 | 6.829317  | -1.643808 | 1.049836  |
| 36 | 8  | 0 | 5.597197  | -2.247994 | 1.168357  |
| 37 | 8  | 0 | 6.402480  | 0.158148  | -2.051950 |
| 38 | 6  | 0 | 3.837392  | -0.988200 | -1.823077 |
| 39 | 6  | 0 | 2.567645  | -1.489077 | -1.738735 |
| 40 | 1  | 0 | 3.871160  | -2.732244 | 0.306020  |
| 41 | 1  | 0 | 4.060250  | -0.233768 | -2.571252 |
| 42 | 6  | 0 | 1.436486  | -0.863704 | -2.348084 |
| 43 | 8  | 0 | 0.268919  | -1.253946 | -2.121026 |
| 44 | 1  | 0 | 2.307419  | -2.327828 | -1.110827 |
| 45 | 8  | 0 | 1.660616  | 0.189287  | -3.116510 |
| 46 | 6  | 0 | 0.492797  | 0.881497  | -3.605973 |
| 47 | 1  | 0 | -0.065114 | 1.315325  | -2.776347 |
| 48 | 1  | 0 | -0.147968 | 0.194663  | -4.152782 |
| 49 | 1  | 0 | 0.880565  | 1.658333  | -4.256091 |
| 50 | 30 | 0 | -1.105013 | -0.746236 | -0.829334 |
| 51 | 6  | 0 | 8.425603  | -0.259074 | -0.091318 |
| 52 | 6  | 0 | 9.350126  | -0.503120 | 0.911138  |
| 53 | 6  | 0 | 9.004756  | -1.327201 | 1.986514  |
| 54 | 6  | 0 | 7.743744  | -1.901503 | 2.064492  |
| 55 | 1  | 0 | 8.651159  | 0.369043  | -0.943181 |
| 56 | 1  | 0 | 10.336211 | -0.061028 | 0.862571  |
| 57 | 1  | 0 | 9.724917  | -1.522287 | 2.770668  |
| 58 | 1  | 0 | 7.453112  | -2.541157 | 2.886555  |
| 59 | 8  | 0 | -2.414325 | 0.374112  | -1.551709 |
| 60 | 8  | 0 | -1.688838 | -2.043497 | 0.418925  |
| 61 | 6  | 0 | -4.248012 | -0.348572 | -2.857855 |
| 62 | 6  | 0 | -5.437800 | -0.998991 | -3.000503 |
| 63 | 6  | 0 | -6.054516 | -1.630119 | -1.888772 |
| 64 | 6  | 0 | -5.419804 | -1.550708 | -0.618031 |
| 65 | 6  | 0 | -4.189808 | -0.832172 | -0.472521 |
| 66 | 6  | 0 | -3.587768 | -0.271117 | -1.595345 |
| 67 | 6  | 0 | -3.603375 | -0.671645 | 0.892717  |
| 68 | 6  | 0 | -4.260561 | 0.172764  | 1.843431  |
| 69 | 6  | 0 | -3.786143 | 0.265321  | 3.183551  |
| 70 | 6  | 0 | -2.450703 | -1.359411 | 1.277313  |
| 71 | 6  | 0 | -2.018569 | -1.291338 | 2.639894  |
| 72 | 6  | 0 | -2.660475 | -0.507248 | 3.560373  |
| 73 | 6  | 0 | -7.276444 | -2.332156 | -2.024694 |
| 74 | 6  | 0 | -7.861921 | -2.946153 | -0.947721 |
| 75 | 6  | 0 | -7.232040 | -2.880743 | 0.314874  |
| 76 | 6  | 0 | -6.049281 | -2.203774 | 0.476667  |
| 77 | 6  | 0 | -5.387604 | 0.966217  | 1.486026  |
| 78 | 6  | 0 | -5.997127 | 1.783461  | 2.403226  |
| 79 | 6  | 0 | -5.527357 | 1.859452  | 3.735176  |
| 80 | 6  | 0 | -4.442365 | 1.113212  | 4.110849  |
| 81 | 1  | 0 | -5.926427 | -1.049295 | -3.967318 |
| 82 | 1  | 0 | -3.758425 | 0.130479  | -3.696570 |
| 83 | 1  | 0 | -7.738989 | -2.375714 | -3.004646 |
| 84 | 1  | 0 | -8.795961 | -3.481694 | -1.061067 |
| 85 | 1  | 0 | -7.686086 | -3.373677 | 1.165739  |
| 86 | 1  | 0 | -5.573909 | -2.171279 | 1.447678  |
| 87 | 1  | 0 | -5.754203 | 0.916943  | 0.469852  |
| 88 | 1  | 0 | -6.851123 | 2.378301  | 2.103751  |
| 89 | 1  | 0 | -6.023231 | 2.505426  | 4.448342  |
| 90 | 1  | 0 | -4.063538 | 1.158869  | 5.125874  |
| 91 | 1  | 0 | -2.317998 | -0.470755 | 4.588759  |

92 1 0 -1.172042 -1.909298 2.917851

**trans-endo-IM1-Re**

Standard orientation:

| Center Number | Atomic Number | Atomic Type | Coordinates (Angstroms) |           |           |
|---------------|---------------|-------------|-------------------------|-----------|-----------|
|               |               |             | X                       | Y         | Z         |
| 1             | 6             | 0           | 1.447667                | 0.407419  | 0.698270  |
| 2             | 7             | 0           | 3.541528                | -0.631175 | 1.019808  |
| 3             | 6             | 0           | 2.227171                | -0.774408 | 0.946091  |
| 4             | 6             | 0           | 1.526471                | -2.036078 | 1.352561  |
| 5             | 6             | 0           | 1.989975                | 1.579027  | 0.234378  |
| 6             | 6             | 0           | 4.114942                | 0.731827  | 1.056874  |
| 7             | 6             | 0           | 3.468530                | 1.696620  | 0.064618  |
| 8             | 1             | 0           | 0.548057                | -2.134233 | 0.879893  |
| 9             | 1             | 0           | 2.104419                | -2.939862 | 1.186587  |
| 10            | 1             | 0           | 1.360512                | -1.956749 | 2.432879  |
| 11            | 6             | 0           | 0.917086                | 2.481158  | -0.033866 |
| 12            | 6             | 0           | -0.268065               | 1.804700  | 0.300749  |
| 13            | 7             | 0           | 0.034979                | 0.475136  | 0.663150  |
| 14            | 1             | 0           | -0.498993               | 0.080885  | 1.443237  |
| 15            | 1             | 0           | 3.947015                | 1.101647  | 2.071180  |
| 16            | 1             | 0           | 5.185447                | 0.647656  | 0.897428  |
| 17            | 1             | 0           | 3.811608                | 2.708110  | 0.290667  |
| 18            | 1             | 0           | 3.750594                | 1.471198  | -0.967449 |
| 19            | 6             | 0           | 0.887245                | 3.812856  | -0.490858 |
| 20            | 6             | 0           | -0.347300               | 4.432632  | -0.548346 |
| 21            | 6             | 0           | -1.529019               | 3.747260  | -0.168343 |
| 22            | 6             | 0           | -1.514337               | 2.436133  | 0.249942  |
| 23            | 1             | 0           | -2.425319               | 1.912172  | 0.501847  |
| 24            | 1             | 0           | 1.802022                | 4.317080  | -0.765247 |
| 25            | 1             | 0           | -2.460130               | 4.293211  | -0.234136 |
| 26            | 8             | 0           | -0.547061               | 5.711441  | -0.953757 |
| 27            | 6             | 0           | 0.590582                | 6.447726  | -1.362862 |
| 28            | 1             | 0           | 0.224542                | 7.427163  | -1.656969 |
| 29            | 1             | 0           | 1.304241                | 6.554376  | -0.541628 |
| 30            | 1             | 0           | 1.081192                | 5.968214  | -2.213874 |
| 31            | 6             | 0           | 6.196349                | -0.793919 | -1.102089 |
| 32            | 6             | 0           | 7.151104                | -0.866066 | 0.032555  |
| 33            | 6             | 0           | 4.875689                | -1.343171 | -0.837690 |
| 34            | 6             | 0           | 4.475201                | -1.730777 | 0.547782  |
| 35            | 6             | 0           | 6.759714                | -1.411440 | 1.255012  |
| 36            | 8             | 0           | 5.496526                | -1.891960 | 1.492583  |
| 37            | 8             | 0           | 6.522507                | -0.303285 | -2.177639 |
| 38            | 6             | 0           | 3.882319                | -1.187561 | -1.784419 |
| 39            | 6             | 0           | 2.571977                | -1.650028 | -1.638257 |
| 40            | 1             | 0           | 3.892267                | -2.644224 | 0.580103  |
| 41            | 1             | 0           | 4.142861                | -0.588708 | -2.652276 |
| 42            | 6             | 0           | 1.458573                | -1.043731 | -2.249919 |
| 43            | 8             | 0           | 0.275687                | -1.451720 | -2.074901 |
| 44            | 1             | 0           | 2.332307                | -2.498219 | -1.016225 |
| 45            | 8             | 0           | 1.686837                | 0.049958  | -2.978608 |
| 46            | 6             | 0           | 0.531941                | 0.709791  | -3.526196 |
| 47            | 1             | 0           | -0.072282               | 1.149907  | -2.731970 |
| 48            | 1             | 0           | -0.074062               | 0.008055  | -4.093843 |
| 49            | 1             | 0           | 0.930666                | 1.487541  | -4.169655 |
| 50            | 30            | 0           | -1.108604               | -0.835806 | -0.878782 |
| 51            | 6             | 0           | 8.460491                | -0.402135 | -0.116281 |
| 52            | 6             | 0           | 9.363222                | -0.485892 | 0.931134  |
| 53            | 6             | 0           | 8.954472                | -1.042245 | 2.145907  |

Imaginary frequency: none  
Electronic energy  $E = -4189.695868$  a.u.  
Enthalpy  $H = -4189.662510$  a.u.  
Entropy  $S = 205.462$  cal/mol/K  
Gibbs free energy  $G = -4189.760132$  a.u.  
Total free energy in solution  $E_{\text{sol}} = -4190.87759$  a.u.

|    |   |   |           |           |           |
|----|---|---|-----------|-----------|-----------|
| 54 | 6 | 0 | 7.656773  | -1.504671 | 2.315511  |
| 55 | 1 | 0 | 8.732188  | 0.012998  | -1.078063 |
| 56 | 1 | 0 | 10.376926 | -0.128786 | 0.809740  |
| 57 | 1 | 0 | 9.653400  | -1.115941 | 2.969333  |
| 58 | 1 | 0 | 7.321039  | -1.938372 | 3.247696  |
| 59 | 8 | 0 | -2.411856 | 0.319766  | -1.556247 |
| 60 | 8 | 0 | -1.673828 | -2.012782 | 0.491720  |
| 61 | 6 | 0 | -4.258107 | -0.443275 | -2.825283 |
| 62 | 6 | 0 | -5.450772 | -1.095021 | -2.934847 |
| 63 | 6 | 0 | -6.061179 | -1.682818 | -1.796186 |
| 64 | 6 | 0 | -5.417896 | -1.557928 | -0.533364 |
| 65 | 6 | 0 | -4.185693 | -0.836632 | -0.423547 |
| 66 | 6 | 0 | -3.589877 | -0.320780 | -1.570678 |
| 67 | 6 | 0 | -3.586759 | -0.624735 | 0.928818  |
| 68 | 6 | 0 | -4.236034 | 0.254130  | 1.853270  |
| 69 | 6 | 0 | -3.746918 | 0.400907  | 3.183498  |
| 70 | 6 | 0 | -2.427052 | -1.292522 | 1.326697  |
| 71 | 6 | 0 | -1.978799 | -1.167672 | 2.679891  |
| 72 | 6 | 0 | -2.613295 | -0.350666 | 3.576793  |
| 73 | 6 | 0 | -7.285027 | -2.387384 | -1.897666 |
| 74 | 6 | 0 | -7.863561 | -2.960743 | -0.794769 |
| 75 | 6 | 0 | -7.224512 | -2.850622 | 0.460183  |
| 76 | 6 | 0 | -6.039889 | -2.169847 | 0.588768  |
| 77 | 6 | 0 | -5.369862 | 1.029952  | 1.478005  |
| 78 | 6 | 0 | -5.973024 | 1.879034  | 2.369802  |
| 79 | 6 | 0 | -5.489817 | 2.007340  | 3.693118  |
| 80 | 6 | 0 | -4.397257 | 1.280998  | 4.084990  |
| 81 | 1 | 0 | -5.946174 | -1.180084 | -3.895718 |
| 82 | 1 | 0 | -3.772756 | 0.002174  | -3.684637 |
| 83 | 1 | 0 | -7.754554 | -2.466329 | -2.872032 |
| 84 | 1 | 0 | -8.798938 | -3.498826 | -0.881866 |
| 85 | 1 | 0 | -7.672850 | -3.312206 | 1.331351  |
| 86 | 1 | 0 | -5.557102 | -2.103252 | 1.554424  |
| 87 | 1 | 0 | -5.747484 | 0.940910  | 0.468652  |
| 88 | 1 | 0 | -6.832626 | 2.458834  | 2.057108  |
| 89 | 1 | 0 | -5.981368 | 2.677722  | 4.386507  |
| 90 | 1 | 0 | -4.007829 | 1.366719  | 5.093366  |
| 91 | 1 | 0 | -2.259152 | -0.273013 | 4.598846  |
| 92 | 1 | 0 | -1.128272 | -1.773119 | 2.973785  |

**trans-endo-TS2-Re**

Standard orientation:

| Center Number | Atomic Number | Atomic Type | Coordinates (Angstroms) |           |           |
|---------------|---------------|-------------|-------------------------|-----------|-----------|
|               |               |             | X                       | Y         | Z         |
| 1             | 6             | 0           | -1.594057               | 0.811433  | -0.341028 |
| 2             | 7             | 0           | -3.771789               | 0.114924  | -0.966934 |
| 3             | 6             | 0           | -2.447151               | -0.133284 | -1.036999 |
| 4             | 6             | 0           | -1.820151               | -0.766552 | -2.257834 |
| 5             | 6             | 0           | -2.040972               | 1.971336  | 0.217941  |
| 6             | 6             | 0           | -4.240424               | 0.955598  | 0.155923  |
| 7             | 6             | 0           | -3.498595               | 2.282892  | 0.209950  |
| 8             | 1             | 0           | -0.835387               | -1.171711 | -2.018910 |
| 9             | 1             | 0           | -2.414544               | -1.553523 | -2.711668 |
| 10            | 1             | 0           | -1.690648               | 0.024790  | -3.002064 |
| 11            | 6             | 0           | -0.892498               | 2.732467  | 0.626349  |
| 12            | 6             | 0           | 0.233740                | 1.977585  | 0.273863  |
| 13            | 7             | 0           | -0.177849               | 0.748151  | -0.309605 |
| 14            | 1             | 0           | 0.280581                | 0.517913  | -1.197679 |
| 15            | 1             | 0           | -5.311981               | 1.097422  | 0.023350  |

Imaginary frequency: -176.0712 cm<sup>-1</sup>  
 Electronic energy  $E = -4188.788003$  a.u.  
 Enthalpy  $H = -4188.741833$  a.u.  
 Entropy  $S = 265.436$  cal/mol/K  
 Gibbs free energy  $G = -4188.867950$  a.u.  
 Total free energy in solution  $E_{\text{sol}} = -4190.37992$  a.u.

|    |    |   |            |           |           |
|----|----|---|------------|-----------|-----------|
| 16 | 1  | 0 | -4.062700  | 0.427979  | 1.096727  |
| 17 | 1  | 0 | -3.742028  | 2.910297  | -0.653123 |
| 18 | 6  | 0 | -0.759511  | 3.988874  | 1.238875  |
| 19 | 6  | 0 | 0.527517   | 4.452243  | 1.462927  |
| 20 | 6  | 0 | 1.653662   | 3.680854  | 1.095559  |
| 21 | 6  | 0 | 1.529160   | 2.439053  | 0.508561  |
| 22 | 1  | 0 | 2.398755   | 1.844455  | 0.263356  |
| 23 | 1  | 0 | -1.634725  | 4.558202  | 1.516380  |
| 24 | 1  | 0 | 2.631360   | 4.094974  | 1.301172  |
| 25 | 8  | 0 | 0.823230   | 5.645598  | 2.039121  |
| 26 | 6  | 0 | -0.261420  | 6.460034  | 2.440514  |
| 27 | 1  | 0 | 0.178156   | 7.352532  | 2.876780  |
| 28 | 1  | 0 | -0.881358  | 6.738774  | 1.584154  |
| 29 | 1  | 0 | -0.877535  | 5.952774  | 3.187876  |
| 30 | 6  | 0 | 3.785455   | -2.232176 | 2.320750  |
| 31 | 6  | 0 | 4.834813   | -3.073967 | 2.095133  |
| 32 | 6  | 0 | 5.539080   | -3.037361 | 0.863433  |
| 33 | 6  | 0 | 5.150176   | -2.086435 | -0.120374 |
| 34 | 6  | 0 | 4.072431   | -1.180418 | 0.140603  |
| 35 | 6  | 0 | 3.369588   | -1.285044 | 1.338426  |
| 36 | 6  | 0 | -6.262572  | -1.694412 | 0.655472  |
| 37 | 6  | 0 | -7.330800  | -1.025027 | -0.117691 |
| 38 | 6  | 0 | -4.947191  | -1.735266 | 0.005927  |
| 39 | 6  | 0 | -4.698329  | -1.018310 | -1.285777 |
| 40 | 6  | 0 | -7.057714  | -0.473942 | -1.369771 |
| 41 | 8  | 0 | -5.820918  | -0.498306 | -1.954368 |
| 42 | 8  | 0 | -6.469206  | -2.178108 | 1.758880  |
| 43 | 6  | 0 | -3.862898  | -2.125214 | 0.737566  |
| 44 | 6  | 0 | -2.541557  | -2.138515 | 0.217741  |
| 45 | 1  | 0 | -4.182677  | -1.638626 | -2.011729 |
| 46 | 1  | 0 | -4.032078  | -2.342739 | 1.787713  |
| 47 | 6  | 0 | -1.400591  | -2.153104 | 1.069431  |
| 48 | 8  | 0 | -0.242869  | -2.396131 | 0.643979  |
| 49 | 1  | 0 | -2.354906  | -2.548716 | -0.762324 |
| 50 | 8  | 0 | -1.606506  | -1.845617 | 2.341390  |
| 51 | 6  | 0 | -0.459126  | -1.900709 | 3.217167  |
| 52 | 1  | 0 | 0.296013   | -1.173803 | 2.920598  |
| 53 | 1  | 0 | -0.028988  | -2.900004 | 3.194325  |
| 54 | 1  | 0 | -0.851233  | -1.670130 | 4.201930  |
| 55 | 30 | 0 | 1.102004   | -1.043501 | 0.270416  |
| 56 | 8  | 0 | 1.659787   | -0.987022 | -1.540110 |
| 57 | 8  | 0 | 2.295928   | -0.521653 | 1.615226  |
| 58 | 6  | 0 | -8.629627  | -0.949631 | 0.393959  |
| 59 | 6  | 0 | -9.639242  | -0.339872 | -0.330451 |
| 60 | 6  | 0 | -9.349103  | 0.202453  | -1.585764 |
| 61 | 6  | 0 | -8.066263  | 0.139740  | -2.109922 |
| 62 | 1  | 0 | -8.806032  | -1.389387 | 1.366857  |
| 63 | 1  | 0 | -10.643349 | -0.285488 | 0.067716  |
| 64 | 1  | 0 | -10.131986 | 0.678833  | -2.162229 |
| 65 | 1  | 0 | -7.823460  | 0.552576  | -3.079587 |
| 66 | 6  | 0 | 3.785813   | -0.089545 | -0.842210 |
| 67 | 6  | 0 | 4.719759   | 0.991779  | -0.957758 |
| 68 | 6  | 0 | 4.532111   | 2.006968  | -1.938241 |
| 69 | 6  | 0 | 3.408984   | 1.923708  | -2.799181 |
| 70 | 6  | 0 | 2.658486   | -0.099059 | -1.661836 |
| 71 | 6  | 0 | 2.508459   | 0.906617  | -2.663949 |
| 72 | 1  | 0 | 3.231163   | -2.250387 | 3.251173  |
| 73 | 1  | 0 | 5.141296   | -3.788012 | 2.851587  |
| 74 | 6  | 0 | 6.612509   | -3.923190 | 0.602100  |
| 75 | 6  | 0 | 5.864880   | -2.073169 | -1.348611 |
| 76 | 6  | 0 | 5.845622   | 1.105596  | -0.095812 |
| 77 | 6  | 0 | 5.458886   | 3.074302  | -2.037756 |



|    |   |   |           |           |           |
|----|---|---|-----------|-----------|-----------|
| 78 | 1 | 0 | 3.273822  | 2.682785  | -3.561414 |
| 79 | 1 | 0 | 1.646859  | 0.825312  | -3.317895 |
| 80 | 6 | 0 | 7.284909  | -3.883259 | -0.591968 |
| 81 | 6 | 0 | 6.898526  | -2.946508 | -1.576277 |
| 82 | 6 | 0 | 6.723706  | 2.153064  | -0.211912 |
| 83 | 6 | 0 | 6.536932  | 3.151138  | -1.195577 |
| 84 | 1 | 0 | 6.889691  | -4.637639 | 1.369425  |
| 85 | 1 | 0 | 8.103607  | -4.565088 | -0.784246 |
| 86 | 1 | 0 | 7.422805  | -2.919007 | -2.523552 |
| 87 | 1 | 0 | 5.573455  | -1.365620 | -2.113173 |
| 88 | 1 | 0 | 5.996556  | 0.351838  | 0.664705  |
| 89 | 1 | 0 | 7.570571  | 2.216623  | 0.460041  |
| 90 | 1 | 0 | 7.240553  | 3.969763  | -1.277228 |
| 91 | 1 | 0 | 5.294197  | 3.831523  | -2.796268 |
| 92 | 1 | 0 | -3.804527 | 2.821331  | 1.108755  |

**trans-endo-TS1-Si**

Standard orientation:

Imaginary frequency: -276.9824 cm<sup>-1</sup>

Electronic energy  $E = -4188.790617$  a.u.

Enthalpy  $H = -4188.743623$  a.u.

Entropy  $S = 205.462$  cal/mol/K

Gibbs free energy  $G = -4188.872347$  a.u.

Total free energy in solution  $E_{sol} = -4190.38228$  a.u.

| Center Number | Atomic Number | Atomic Type | Coordinates (Angstroms) |           |           |
|---------------|---------------|-------------|-------------------------|-----------|-----------|
|               |               |             | X                       | Y         | Z         |
| 1             | 6             | 0           | 1.848756                | 0.314099  | -1.504051 |
| 2             | 7             | 0           | 3.962638                | -0.759113 | -1.396851 |
| 3             | 6             | 0           | 2.675062                | -0.874418 | -1.512744 |
| 4             | 6             | 0           | 1.999578                | -2.207550 | -1.655949 |
| 5             | 6             | 0           | 2.323421                | 1.526351  | -1.044750 |
| 6             | 6             | 0           | 4.539722                | 0.590765  | -1.522604 |
| 7             | 6             | 0           | 3.784233                | 1.709148  | -0.789758 |
| 8             | 1             | 0           | 1.189724                | -2.321410 | -0.932006 |
| 9             | 1             | 0           | 2.700333                | -3.035539 | -1.581513 |
| 10            | 1             | 0           | 1.551721                | -2.246724 | -2.653519 |
| 11            | 6             | 0           | 1.185661                | 2.339260  | -0.790517 |
| 12            | 6             | 0           | 0.051038                | 1.562208  | -1.144171 |
| 13            | 7             | 0           | 0.479373                | 0.340690  | -1.599933 |
| 14            | 1             | 0           | -0.163174               | -0.434973 | -1.755955 |
| 15            | 1             | 0           | 4.533950                | 0.811908  | -2.593276 |
| 16            | 1             | 0           | 5.575864                | 0.542549  | -1.196273 |
| 17            | 1             | 0           | 4.140547                | 2.663961  | -1.183766 |
| 18            | 1             | 0           | 3.996083                | 1.706856  | 0.283089  |
| 19            | 6             | 0           | 1.023442                | 3.646752  | -0.284848 |
| 20            | 6             | 0           | -0.263721               | 4.129554  | -0.135133 |
| 21            | 6             | 0           | -1.388593               | 3.343819  | -0.495217 |
| 22            | 6             | 0           | -1.256522               | 2.072116  | -1.010262 |
| 23            | 1             | 0           | -2.124206               | 1.502913  | -1.324645 |
| 24            | 1             | 0           | 1.891449                | 4.235001  | -0.023364 |
| 25            | 1             | 0           | -2.370648               | 3.775246  | -0.358683 |
| 26            | 8             | 0           | -0.574133               | 5.360775  | 0.349729  |
| 27            | 6             | 0           | 0.502705                | 6.203782  | 0.712113  |
| 28            | 1             | 0           | 0.055331                | 7.128908  | 1.064338  |
| 29            | 1             | 0           | 1.145245                | 6.411010  | -0.147812 |
| 30            | 1             | 0           | 1.099026                | 5.756944  | 1.512627  |
| 31            | 6             | 0           | -4.337521               | 2.263302  | 1.047623  |
| 32            | 6             | 0           | -5.371830               | 2.658616  | 0.250445  |
| 33            | 6             | 0           | -5.917112               | 1.772338  | -0.714579 |
| 34            | 6             | 0           | -5.392682               | 0.452966  | -0.805688 |
| 35            | 6             | 0           | -4.333273               | 0.031487  | 0.064642  |
| 36            | 6             | 0           | -3.776777               | 0.954565  | 0.948613  |
| 37            | 6             | 0           | 6.274207                | -0.320850 | 1.213272  |
| 38            | 6             | 0           | 7.388628                | -0.749036 | 0.331490  |
| 39            | 6             | 0           | 5.013596                | -0.995758 | 0.966967  |

|    |    |   |           |           |           |
|----|----|---|-----------|-----------|-----------|
| 40 | 6  | 0 | 4.870438  | -1.849783 | -0.166864 |
| 41 | 6  | 0 | 7.179024  | -1.717025 | -0.647713 |
| 42 | 8  | 0 | 5.953830  | -2.321575 | -0.824837 |
| 43 | 8  | 0 | 6.431686  | 0.542751  | 2.071134  |
| 44 | 6  | 0 | 3.867718  | -0.550368 | 1.662891  |
| 45 | 6  | 0 | 2.593074  | -1.009458 | 1.479788  |
| 46 | 1  | 0 | 4.104119  | -2.610159 | -0.150930 |
| 47 | 1  | 0 | 4.036642  | 0.292929  | 2.325492  |
| 48 | 6  | 0 | 1.429116  | -0.265771 | 1.842506  |
| 49 | 8  | 0 | 0.289043  | -0.644183 | 1.485540  |
| 50 | 1  | 0 | 2.373707  | -1.906351 | 0.922256  |
| 51 | 8  | 0 | 1.605263  | 0.856182  | 2.520463  |
| 52 | 6  | 0 | 0.429530  | 1.633887  | 2.813407  |
| 53 | 1  | 0 | 0.045588  | 2.086238  | 1.898038  |
| 54 | 1  | 0 | -0.334965 | 1.017724  | 3.281285  |
| 55 | 1  | 0 | 0.766305  | 2.411053  | 3.491370  |
| 56 | 30 | 0 | -1.357734 | -0.012391 | 0.685269  |
| 57 | 8  | 0 | -1.761616 | -0.939134 | -0.911461 |
| 58 | 8  | 0 | -2.714232 | 0.690673  | 1.722621  |
| 59 | 6  | 0 | 8.661617  | -0.189803 | 0.463314  |
| 60 | 6  | 0 | 9.696593  | -0.597486 | -0.362732 |
| 61 | 6  | 0 | 9.463308  | -1.574494 | -1.335089 |
| 62 | 6  | 0 | 8.204755  | -2.140088 | -1.484928 |
| 63 | 1  | 0 | 8.797940  | 0.560483  | 1.231007  |
| 64 | 1  | 0 | 10.682072 | -0.164240 | -0.256093 |
| 65 | 1  | 0 | 10.269209 | -1.896872 | -1.981718 |
| 66 | 1  | 0 | 7.999800  | -2.897059 | -2.229643 |
| 67 | 6  | 0 | -3.916053 | -1.406593 | 0.033265  |
| 68 | 6  | 0 | -4.827879 | -2.400730 | 0.521363  |
| 69 | 6  | 0 | -4.527515 | -3.783208 | 0.374124  |
| 70 | 6  | 0 | -2.709351 | -1.820284 | -0.518993 |
| 71 | 6  | 0 | -2.426512 | -3.207336 | -0.669547 |
| 72 | 6  | 0 | -3.308894 | -4.158096 | -0.247634 |
| 73 | 1  | 0 | -5.786396 | 3.656816  | 0.339043  |
| 74 | 1  | 0 | -3.898195 | 2.927160  | 1.782055  |
| 75 | 6  | 0 | -6.964967 | 2.177945  | -1.576605 |
| 76 | 6  | 0 | -5.950411 | -0.412129 | -1.786605 |
| 77 | 6  | 0 | -6.048116 | -2.052060 | 1.160639  |
| 78 | 6  | 0 | -5.440622 | -4.758022 | 0.846516  |
| 79 | 1  | 0 | -3.086097 | -5.211923 | -0.371207 |
| 80 | 1  | 0 | -1.484937 | -3.473962 | -1.134319 |
| 81 | 6  | 0 | -6.911838 | -3.017383 | 1.612624  |
| 82 | 6  | 0 | -6.613116 | -4.388954 | 1.452543  |
| 83 | 6  | 0 | -7.483566 | 1.318200  | -2.509557 |
| 84 | 6  | 0 | -6.961888 | 0.009402  | -2.612720 |
| 85 | 1  | 0 | -7.347665 | 3.188211  | -1.482427 |
| 86 | 1  | 0 | -8.283868 | 1.636682  | -3.165318 |
| 87 | 1  | 0 | -7.363905 | -0.670117 | -3.354071 |
| 88 | 1  | 0 | -5.557655 | -1.415297 | -1.880643 |
| 89 | 1  | 0 | -6.285133 | -1.005666 | 1.295361  |
| 90 | 1  | 0 | -7.832953 | -2.723944 | 2.100607  |
| 91 | 1  | 0 | -7.305405 | -5.139813 | 1.811780  |
| 92 | 1  | 0 | -5.189011 | -5.805052 | 0.719400  |

**trans-endo-IM1-Si**

Standard orientation:

| Center Number | Atomic Number | Atomic Type | Coordinates (Angstroms) |          |           |
|---------------|---------------|-------------|-------------------------|----------|-----------|
|               |               |             | X                       | Y        | Z         |
| 1             | 6             | 0           | 1.749807                | 0.042867 | -1.252318 |

Imaginary frequency: -190.7999 cm<sup>-1</sup>  
 Electronic energy  $E = -4188.798160$  a.u.  
 Enthalpy  $H = -4188.751220$  a.u.  
 Entropy  $S = 205.462$  cal/mol/K  
 Gibbs free energy  $G = -4188.880474$  a.u.  
 Total free energy in solution  $E_{sol} = -4190.39423$  a.u.

|    |    |   |           |           |           |
|----|----|---|-----------|-----------|-----------|
| 2  | 7  | 0 | 3.874953  | -0.954673 | -1.122392 |
| 3  | 6  | 0 | 2.558833  | -1.119476 | -1.099859 |
| 4  | 6  | 0 | 1.892741  | -2.463138 | -1.061033 |
| 5  | 6  | 0 | 2.242151  | 1.333752  | -1.078189 |
| 6  | 6  | 0 | 4.405570  | 0.345660  | -1.590523 |
| 7  | 6  | 0 | 3.714961  | 1.561375  | -0.972782 |
| 8  | 1  | 0 | 1.065038  | -2.467596 | -0.351298 |
| 9  | 1  | 0 | 2.575339  | -3.278696 | -0.841563 |
| 10 | 1  | 0 | 1.478964  | -2.638006 | -2.059194 |
| 11 | 6  | 0 | 1.124195  | 2.187777  | -0.961608 |
| 12 | 6  | 0 | -0.022317 | 1.361906  | -1.090187 |
| 13 | 7  | 0 | 0.372841  | 0.068607  | -1.268491 |
| 14 | 1  | 0 | -0.292055 | -0.709766 | -1.263704 |
| 15 | 1  | 0 | 4.241082  | 0.359713  | -2.670235 |
| 16 | 1  | 0 | 5.475703  | 0.352785  | -1.408405 |
| 17 | 1  | 0 | 4.021536  | 2.442614  | -1.541112 |
| 18 | 1  | 0 | 4.017220  | 1.718580  | 0.065940  |
| 19 | 6  | 0 | 0.980604  | 3.579668  | -0.740623 |
| 20 | 6  | 0 | -0.297680 | 4.083641  | -0.656399 |
| 21 | 6  | 0 | -1.439454 | 3.239658  | -0.791195 |
| 22 | 6  | 0 | -1.325142 | 1.890952  | -1.009758 |
| 23 | 1  | 0 | -2.196598 | 1.256800  | -1.099855 |
| 24 | 1  | 0 | 1.856001  | 4.204772  | -0.640665 |
| 25 | 1  | 0 | -2.415076 | 3.701224  | -0.715296 |
| 26 | 8  | 0 | -0.602019 | 5.391678  | -0.441842 |
| 27 | 6  | 0 | 0.482382  | 6.289688  | -0.310249 |
| 28 | 1  | 0 | 0.044326  | 7.271161  | -0.151575 |
| 29 | 1  | 0 | 1.092693  | 6.302388  | -1.217292 |
| 30 | 1  | 0 | 1.109335  | 6.025121  | 0.545625  |
| 31 | 6  | 0 | -3.634912 | 1.554726  | 2.301275  |
| 32 | 6  | 0 | -4.240373 | 2.572519  | 1.625974  |
| 33 | 6  | 0 | -4.759824 | 2.362505  | 0.321828  |
| 34 | 6  | 0 | -4.666945 | 1.063300  | -0.252959 |
| 35 | 6  | 0 | -4.063007 | -0.011415 | 0.480463  |
| 36 | 6  | 0 | -3.509288 | 0.251808  | 1.731534  |
| 37 | 6  | 0 | 6.202804  | -0.116042 | 1.154390  |
| 38 | 6  | 0 | 7.305827  | -0.477525 | 0.227766  |
| 39 | 6  | 0 | 4.986435  | -0.895387 | 0.997800  |
| 40 | 6  | 0 | 4.786342  | -1.750718 | -0.215052 |
| 41 | 6  | 0 | 7.121667  | -1.460044 | -0.745844 |
| 42 | 8  | 0 | 5.933618  | -2.120381 | -0.932071 |
| 43 | 8  | 0 | 6.339498  | 0.770394  | 1.991796  |
| 44 | 6  | 0 | 3.889243  | -0.606338 | 1.781176  |
| 45 | 6  | 0 | 2.684415  | -1.315915 | 1.729033  |
| 46 | 1  | 0 | 4.261830  | -2.674861 | 0.000351  |
| 47 | 1  | 0 | 3.974578  | 0.262293  | 2.427527  |
| 48 | 6  | 0 | 1.434017  | -0.789380 | 2.069027  |
| 49 | 8  | 0 | 0.374327  | -1.487837 | 1.992607  |
| 50 | 1  | 0 | 2.653275  | -2.335127 | 1.376690  |
| 51 | 8  | 0 | 1.380651  | 0.500109  | 2.411928  |
| 52 | 6  | 0 | 0.093489  | 1.091355  | 2.620686  |
| 53 | 1  | 0 | -0.414683 | 1.245060  | 1.662979  |
| 54 | 1  | 0 | -0.518763 | 0.494241  | 3.294618  |
| 55 | 1  | 0 | 0.292280  | 2.063830  | 3.059575  |
| 56 | 30 | 0 | -1.412574 | -1.196742 | 1.426276  |
| 57 | 8  | 0 | -1.685172 | -1.459508 | -0.409421 |
| 58 | 8  | 0 | -2.850727 | -0.668135 | 2.454615  |
| 59 | 6  | 0 | 8.549532  | 0.149559  | 0.332856  |
| 60 | 6  | 0 | 9.591719  | -0.200121 | -0.510254 |
| 61 | 6  | 0 | 9.390556  | -1.191659 | -1.473899 |
| 62 | 6  | 0 | 8.160794  | -1.823209 | -1.598094 |
| 63 | 1  | 0 | 8.658663  | 0.906339  | 1.098639  |

|    |   |   |           |           |           |
|----|---|---|-----------|-----------|-----------|
| 64 | 1 | 0 | 10.553725 | 0.286578  | -0.422314 |
| 65 | 1 | 0 | 10.199000 | -1.474334 | -2.136121 |
| 66 | 1 | 0 | 7.984042  | -2.590077 | -2.340019 |
| 67 | 6 | 0 | -4.072466 | -1.385255 | -0.112527 |
| 68 | 6 | 0 | -5.321996 | -2.076119 | -0.249973 |
| 69 | 6 | 0 | -5.379355 | -3.326285 | -0.925567 |
| 70 | 6 | 0 | -2.918445 | -1.998705 | -0.581506 |
| 71 | 6 | 0 | -2.988983 | -3.245629 | -1.261119 |
| 72 | 6 | 0 | -4.181024 | -3.885221 | -1.438611 |
| 73 | 1 | 0 | -4.325841 | 3.557277  | 2.071731  |
| 74 | 1 | 0 | -3.228175 | 1.694067  | 3.295521  |
| 75 | 6 | 0 | -5.346907 | 3.421178  | -0.414621 |
| 76 | 6 | 0 | -5.164982 | 0.889698  | -1.573913 |
| 77 | 6 | 0 | -6.533001 | -1.550031 | 0.276005  |
| 78 | 6 | 0 | -6.620815 | -3.994006 | -1.069288 |
| 79 | 1 | 0 | -4.226230 | -4.834147 | -1.960782 |
| 80 | 1 | 0 | -2.059377 | -3.664432 | -1.626580 |
| 81 | 6 | 0 | -7.720182 | -2.221405 | 0.127174  |
| 82 | 6 | 0 | -7.772429 | -3.455968 | -0.557955 |
| 83 | 6 | 0 | -5.818933 | 3.219617  | -1.686231 |
| 84 | 6 | 0 | -5.719368 | 1.936328  | -2.267829 |
| 85 | 1 | 0 | -5.410850 | 4.398862  | 0.050510  |
| 86 | 1 | 0 | -6.262855 | 4.034905  | -2.243037 |
| 87 | 1 | 0 | -6.084462 | 1.775458  | -3.274524 |
| 88 | 1 | 0 | -5.093207 | -0.086026 | -2.034789 |
| 89 | 1 | 0 | -6.504611 | -0.610636 | 0.810627  |
| 90 | 1 | 0 | -8.627383 | -1.801507 | 0.543384  |
| 91 | 1 | 0 | -8.716701 | -3.973350 | -0.670011 |
| 92 | 1 | 0 | -6.638055 | -4.944612 | -1.590436 |

**trans-endo-TS2-Si**

Standard orientation:

| Center Number | Atomic Number | Atomic Type | Coordinates (Angstroms) |           |           |
|---------------|---------------|-------------|-------------------------|-----------|-----------|
|               |               |             | X                       | Y         | Z         |
| 1             | 6             | 0           | 1.659363                | 0.572457  | -0.919310 |
| 2             | 7             | 0           | 3.984497                | 0.120045  | -0.994143 |
| 3             | 6             | 0           | 2.748872                | -0.276596 | -1.352982 |
| 4             | 6             | 0           | 2.487103                | -0.997208 | -2.656815 |
| 5             | 6             | 0           | 1.839588                | 1.802781  | -0.351312 |
| 6             | 1             | 0           | 1.572667                | -1.584999 | -2.572392 |
| 7             | 1             | 0           | 3.285898                | -1.660444 | -2.973328 |
| 8             | 1             | 0           | 2.354395                | -0.240301 | -3.434395 |
| 9             | 6             | 0           | 0.576887                | 2.484054  | -0.365721 |
| 10            | 6             | 0           | -0.339085               | 1.618457  | -0.977968 |
| 11            | 7             | 0           | 0.298606                | 0.381875  | -1.251797 |
| 12            | 1             | 0           | 0.046673                | -0.054519 | -2.134671 |
| 13            | 6             | 0           | 0.182221                | 3.770426  | 0.042996  |
| 14            | 6             | 0           | -1.123948               | 4.147317  | -0.221060 |
| 15            | 6             | 0           | -2.017988               | 3.279118  | -0.891308 |
| 16            | 6             | 0           | -1.650032               | 2.004266  | -1.263466 |
| 17            | 1             | 0           | -2.341171               | 1.320575  | -1.735841 |
| 18            | 1             | 0           | 0.884638                | 4.425758  | 0.536894  |
| 19            | 1             | 0           | -3.022258               | 3.637717  | -1.072204 |
| 20            | 8             | 0           | -1.658962               | 5.347453  | 0.122219  |
| 21            | 6             | 0           | -0.824904               | 6.253009  | 0.817773  |
| 22            | 1             | 0           | -1.433716               | 7.130281  | 1.018383  |
| 23            | 1             | 0           | 0.038584                | 6.538893  | 0.210964  |
| 24            | 1             | 0           | -0.480647               | 5.821687  | 1.761631  |

Imaginary frequency: -197.9714 cm<sup>-1</sup>  
 Electronic energy  $E = -4188.788640$  a.u.  
 Enthalpy  $H = -4188.743562$  a.u.  
 Entropy  $S = 255.478$  cal/mol/K  
 Gibbs free energy  $G = -4188.864948$  a.u.  
 Total free energy in solution  $E_{\text{sol}} = -4190.38213$  a.u.

|    |    |   |           |           |           |
|----|----|---|-----------|-----------|-----------|
| 25 | 6  | 0 | -2.589490 | 1.440625  | 2.064754  |
| 26 | 6  | 0 | -3.492759 | 2.450498  | 1.917243  |
| 27 | 6  | 0 | -4.542033 | 2.341749  | 0.967555  |
| 28 | 6  | 0 | -4.662798 | 1.141224  | 0.212511  |
| 29 | 6  | 0 | -3.742123 | 0.060283  | 0.413839  |
| 30 | 6  | 0 | -2.676227 | 0.245039  | 1.291983  |
| 31 | 6  | 0 | 6.270857  | -1.406077 | 1.154488  |
| 32 | 6  | 0 | 7.382629  | -0.579271 | 0.633040  |
| 33 | 6  | 0 | 5.141232  | -1.590695 | 0.238614  |
| 34 | 6  | 0 | 5.092370  | -0.888237 | -1.080934 |
| 35 | 6  | 0 | 7.319527  | -0.039414 | -0.651307 |
| 36 | 8  | 0 | 6.258692  | -0.223310 | -1.496637 |
| 37 | 8  | 0 | 6.303873  | -1.894504 | 2.274748  |
| 38 | 6  | 0 | 3.984904  | -2.137480 | 0.724288  |
| 39 | 6  | 0 | 2.800064  | -2.271991 | -0.037617 |
| 40 | 1  | 0 | 4.828881  | -1.556787 | -1.893940 |
| 41 | 1  | 0 | 3.966107  | -2.365537 | 1.785336  |
| 42 | 6  | 0 | 1.525120  | -2.439748 | 0.587011  |
| 43 | 8  | 0 | 0.462845  | -2.521978 | -0.083118 |
| 44 | 1  | 0 | 2.838306  | -2.615564 | -1.057020 |
| 45 | 8  | 0 | 1.521720  | -2.469577 | 1.905757  |
| 46 | 6  | 0 | 0.270921  | -2.743959 | 2.581764  |
| 47 | 1  | 0 | -0.386344 | -1.879241 | 2.533391  |
| 48 | 1  | 0 | -0.206660 | -3.607722 | 2.124337  |
| 49 | 1  | 0 | 0.558109  | -2.961702 | 3.605169  |
| 50 | 30 | 0 | -0.937303 | -1.142216 | -0.175784 |
| 51 | 8  | 0 | -2.045029 | -1.059257 | -1.697934 |
| 52 | 8  | 0 | -1.696332 | -0.654113 | 1.455273  |
| 53 | 6  | 0 | 8.513313  | -0.340936 | 1.419134  |
| 54 | 6  | 0 | 9.563338  | 0.419627  | 0.933260  |
| 55 | 6  | 0 | 9.484870  | 0.949336  | -0.357891 |
| 56 | 6  | 0 | 8.370259  | 0.725391  | -1.153000 |
| 57 | 1  | 0 | 8.529901  | -0.777093 | 2.409346  |
| 58 | 1  | 0 | 10.437569 | 0.600457  | 1.544015  |
| 59 | 1  | 0 | 10.301476 | 1.543004  | -0.748807 |
| 60 | 1  | 0 | 8.292175  | 1.125578  | -2.154680 |
| 61 | 6  | 0 | -3.988538 | -1.236533 | -0.293752 |
| 62 | 6  | 0 | -5.132399 | -2.016994 | 0.081754  |
| 63 | 6  | 0 | -5.476913 | -3.186106 | -0.652322 |
| 64 | 6  | 0 | -3.182529 | -1.684251 | -1.337801 |
| 65 | 6  | 0 | -3.551720 | -2.849485 | -2.071846 |
| 66 | 6  | 0 | -4.661926 | -3.571531 | -1.747814 |
| 67 | 1  | 0 | -3.406820 | 3.361339  | 2.499799  |
| 68 | 1  | 0 | -1.762845 | 1.512590  | 2.760642  |
| 69 | 6  | 0 | -5.442395 | 3.411862  | 0.742583  |
| 70 | 6  | 0 | -5.700545 | 1.073883  | -0.757643 |
| 71 | 6  | 0 | -5.955688 | -1.665314 | 1.186391  |
| 72 | 6  | 0 | -6.614703 | -3.944009 | -0.281338 |
| 73 | 1  | 0 | -4.930986 | -4.455050 | -2.315940 |
| 74 | 1  | 0 | -2.907496 | -3.135502 | -2.893829 |
| 75 | 6  | 0 | -7.049015 | -2.421188 | 1.526641  |
| 76 | 6  | 0 | -7.392149 | -3.573600 | 0.784756  |
| 77 | 6  | 0 | -6.429712 | 3.316692  | -0.204377 |
| 78 | 6  | 0 | -6.552759 | 2.130461  | -0.961924 |
| 79 | 1  | 0 | -5.324876 | 4.315762  | 1.330336  |
| 80 | 1  | 0 | -7.110154 | 4.141559  | -0.373969 |
| 81 | 1  | 0 | -7.327911 | 2.053606  | -1.714466 |
| 82 | 1  | 0 | -5.802403 | 0.173127  | -1.347673 |
| 83 | 1  | 0 | -5.701437 | -0.789914 | 1.768221  |
| 84 | 1  | 0 | -7.655043 | -2.131568 | 2.376275  |
| 85 | 1  | 0 | -8.259630 | -4.159037 | 1.062121  |
| 86 | 1  | 0 | -6.855417 | -4.828820 | -0.860252 |

|    |   |   |          |          |           |
|----|---|---|----------|----------|-----------|
| 87 | 6 | 0 | 4.074083 | 1.006300 | 0.184515  |
| 88 | 1 | 0 | 5.124451 | 1.258215 | 0.320569  |
| 89 | 6 | 0 | 3.215112 | 2.251862 | 0.009263  |
| 90 | 1 | 0 | 3.719386 | 0.462728 | 1.065318  |
| 91 | 1 | 0 | 3.225242 | 2.819666 | 0.941551  |
| 92 | 1 | 0 | 3.612755 | 2.900031 | -0.778139 |

**trans-exo-TS1-Re**

Standard orientation:

Imaginary frequency: -283.8582 cm<sup>-1</sup>

Electronic energy  $E = -4188.787657$  a.u.

Enthalpy  $H = -4188.741447$  a.u.

Entropy  $S = 264.139$  cal/mol/K

Gibbs free energy  $G = -4188.866948$  a.u.

Total free energy in solution  $E_{\text{sol}} = -4190.38164$  a.u.

| Center Number | Atomic Number | Atomic Type | Coordinates (Angstroms) |           |           |
|---------------|---------------|-------------|-------------------------|-----------|-----------|
|               |               |             | X                       | Y         | Z         |
| 1             | 6             | 0           | -2.444160               | -2.535435 | -0.231472 |
| 2             | 7             | 0           | -3.783092               | -0.894141 | -1.272581 |
| 3             | 6             | 0           | -3.621618               | -1.702398 | -0.264821 |
| 4             | 6             | 0           | -4.611255               | -1.756413 | 0.858634  |
| 5             | 6             | 0           | -1.356869               | -2.276651 | -1.044244 |
| 6             | 6             | 0           | -2.955970               | -1.105808 | -2.470579 |
| 7             | 6             | 0           | -1.465783               | -1.325985 | -2.189291 |
| 8             | 1             | 0           | -4.218097               | -1.284091 | 1.760244  |
| 9             | 1             | 0           | -4.819008               | -2.808270 | 1.074790  |
| 10            | 1             | 0           | -5.545070               | -1.277524 | 0.579654  |
| 11            | 6             | 0           | -0.242326               | -2.925455 | -0.452261 |
| 12            | 6             | 0           | -0.716404               | -3.597455 | 0.696938  |
| 13            | 7             | 0           | -2.059876               | -3.354883 | 0.811607  |
| 14            | 1             | 0           | -2.640562               | -3.648802 | 1.576990  |
| 15            | 1             | 0           | -3.124338               | -0.259485 | -3.135845 |
| 16            | 1             | 0           | -3.358830               | -1.996420 | -2.958849 |
| 17            | 1             | 0           | -0.904142               | -0.414007 | -1.962763 |
| 18            | 1             | 0           | -1.010430               | -1.742849 | -3.090788 |
| 19            | 6             | 0           | 1.138842                | -2.942004 | -0.783638 |
| 20            | 6             | 0           | 1.990950                | -3.677556 | 0.029408  |
| 21            | 6             | 0           | 1.490903                | -4.348875 | 1.183127  |
| 22            | 6             | 0           | 0.159722                | -4.327608 | 1.519417  |
| 23            | 1             | 0           | 1.481647                | -2.442095 | -1.678395 |
| 24            | 1             | 0           | -0.192486               | -4.840539 | 2.404825  |
| 25            | 1             | 0           | 2.210650                | -4.880665 | 1.789632  |
| 26            | 8             | 0           | 3.305550                | -3.823604 | -0.188496 |
| 27            | 6             | 0           | 3.839899                | -3.240659 | -1.378433 |
| 28            | 1             | 0           | 3.365520                | -3.686467 | -2.256089 |
| 29            | 1             | 0           | 3.705034                | -2.157273 | -1.374955 |
| 30            | 1             | 0           | 4.900217                | -3.467344 | -1.365607 |
| 31            | 30            | 0           | 1.279795                | -0.935964 | 0.547924  |
| 32            | 8             | 0           | 1.150237                | 0.051292  | -1.060064 |
| 33            | 8             | 0           | 2.854925                | -0.917612 | 1.551666  |
| 34            | 6             | 0           | -5.653047               | 1.399919  | 0.862050  |
| 35            | 6             | 0           | -6.735548               | 1.289003  | -0.151752 |
| 36            | 6             | 0           | -4.322580               | 1.174897  | 0.341812  |
| 37            | 6             | 0           | -4.146123               | 0.834500  | -1.040145 |
| 38            | 6             | 0           | -6.429341               | 1.138095  | -1.502484 |
| 39            | 8             | 0           | -5.127430               | 1.105316  | -1.945921 |
| 40            | 8             | 0           | -5.910699               | 1.620832  | 2.042560  |
| 41            | 6             | 0           | -3.250967               | 1.056610  | 1.248584  |
| 42            | 6             | 0           | -2.008011               | 0.536428  | 0.994164  |
| 43            | 1             | 0           | -3.191725               | 1.128556  | -1.469541 |
| 44            | 1             | 0           | -3.502840               | 1.311644  | 2.273127  |
| 45            | 6             | 0           | -1.093011               | 0.199500  | 2.042041  |
| 46            | 8             | 0           | -0.102189               | -0.549917 | 1.895522  |
| 47            | 1             | 0           | -1.679845               | 0.234443  | 0.011311  |
| 48            | 8             | 0           | -1.371691               | 0.668824  | 3.250450  |

|    |   |   |            |           |           |
|----|---|---|------------|-----------|-----------|
| 49 | 6 | 0 | -0.438198  | 0.334096  | 4.292345  |
| 50 | 1 | 0 | -0.425551  | -0.741966 | 4.452896  |
| 51 | 1 | 0 | 0.559306   | 0.671282  | 4.020870  |
| 52 | 1 | 0 | -0.801802  | 0.853419  | 5.172824  |
| 53 | 6 | 0 | -8.077632  | 1.353840  | 0.229883  |
| 54 | 6 | 0 | -9.083605  | 1.270609  | -0.719221 |
| 55 | 6 | 0 | -8.751841  | 1.126885  | -2.069533 |
| 56 | 6 | 0 | -7.424660  | 1.060940  | -2.470114 |
| 57 | 1 | 0 | -8.288234  | 1.480348  | 1.283767  |
| 58 | 1 | 0 | -10.121860 | 1.322730  | -0.419333 |
| 59 | 1 | 0 | -9.534458  | 1.065907  | -2.814975 |
| 60 | 1 | 0 | -7.143277  | 0.954269  | -3.508898 |
| 61 | 6 | 0 | 3.909708   | -0.609153 | 0.798572  |
| 62 | 6 | 0 | 5.086112   | -1.402262 | 0.971398  |
| 63 | 6 | 0 | 6.191975   | -1.219420 | 0.194977  |
| 64 | 6 | 0 | 6.199220   | -0.237224 | -0.830281 |
| 65 | 6 | 0 | 5.055821   | 0.596704  | -0.984783 |
| 66 | 6 | 0 | 3.920774   | 0.441080  | -0.122300 |
| 67 | 6 | 0 | 2.851100   | 1.490979  | -0.156015 |
| 68 | 6 | 0 | 3.181726   | 2.801138  | 0.329541  |
| 69 | 6 | 0 | 2.251078   | 3.870709  | 0.209401  |
| 70 | 6 | 0 | 0.988335   | 3.615194  | -0.384113 |
| 71 | 6 | 0 | 1.578086   | 1.269235  | -0.675830 |
| 72 | 6 | 0 | 0.664597   | 2.358368  | -0.801814 |
| 73 | 1 | 0 | 5.044548   | -2.169087 | 1.734469  |
| 74 | 1 | 0 | 7.075814   | -1.831877 | 0.339807  |
| 75 | 6 | 0 | 7.316549   | -0.069161 | -1.683825 |
| 76 | 6 | 0 | 5.090137   | 1.577655  | -2.013411 |
| 77 | 6 | 0 | 4.429510   | 3.082113  | 0.950997  |
| 78 | 6 | 0 | 2.589692   | 5.161833  | 0.683154  |
| 79 | 1 | 0 | 0.281947   | 4.431300  | -0.487656 |
| 80 | 1 | 0 | -0.302723  | 2.143813  | -1.240965 |
| 81 | 6 | 0 | 3.805109   | 5.401148  | 1.269276  |
| 82 | 6 | 0 | 4.729016   | 4.341360  | 1.406817  |
| 83 | 6 | 0 | 6.184658   | 1.714562  | -2.829946 |
| 84 | 6 | 0 | 7.317442   | 0.886383  | -2.667199 |
| 85 | 1 | 0 | 1.861159   | 5.957771  | 0.574239  |
| 86 | 1 | 0 | 4.056286   | 6.390518  | 1.630087  |
| 87 | 1 | 0 | 5.685702   | 4.523565  | 1.880686  |
| 88 | 1 | 0 | 5.143901   | 2.279848  | 1.072279  |
| 89 | 1 | 0 | 4.227205   | 2.215313  | -2.150250 |
| 90 | 1 | 0 | 6.179296   | 2.467122  | -3.609084 |
| 91 | 1 | 0 | 8.176350   | 1.007744  | -3.315175 |
| 92 | 1 | 0 | 8.175914   | -0.715358 | -1.540122 |

**trans-exo-IM1-Re**

Standard orientation:

| Center Number | Atomic Number | Atomic Type | Coordinates (Angstroms) |           |           |
|---------------|---------------|-------------|-------------------------|-----------|-----------|
|               |               |             | X                       | Y         | Z         |
| 1             | 6             | 0           | -2.505606               | -2.381415 | -0.341400 |
| 2             | 7             | 0           | -3.710965               | -0.596891 | -1.267721 |
| 3             | 6             | 0           | -3.629336               | -1.498766 | -0.313515 |
| 4             | 6             | 0           | -4.643748               | -1.627520 | 0.780036  |
| 5             | 6             | 0           | -1.377905               | -2.096824 | -1.099334 |

Imaginary frequency: -6.5286 cm<sup>-1</sup>  
 Electronic energy  $E = -4188.788771$  a.u.  
 Enthalpy  $H = -4188.742210$  a.u.  
 Entropy  $S = 265.800$  cal/mol/K  
 Gibbs free energy  $G = -4188.868500$  a.u.  
 Total free energy in solution  $E_{\text{sol}} = -4190.38696$  a.u.

|    |    |   |            |           |           |
|----|----|---|------------|-----------|-----------|
| 6  | 6  | 0 | -2.907117  | -0.808489 | -2.486601 |
| 7  | 6  | 0 | -1.432357  | -1.089949 | -2.196670 |
| 8  | 1  | 0 | -4.268648  | -1.213768 | 1.716836  |
| 9  | 1  | 0 | -4.839914  | -2.694789 | 0.915734  |
| 10 | 1  | 0 | -5.578943  | -1.141220 | 0.521490  |
| 11 | 6  | 0 | -0.300595  | -2.801727 | -0.511640 |
| 12 | 6  | 0 | -0.831650  | -3.532293 | 0.577268  |
| 13 | 7  | 0 | -2.172785  | -3.278141 | 0.658547  |
| 14 | 1  | 0 | -2.776475  | -3.587544 | 1.399728  |
| 15 | 1  | 0 | -3.047838  | 0.065160  | -3.119334 |
| 16 | 1  | 0 | -3.343173  | -1.670980 | -2.994312 |
| 17 | 1  | 0 | -0.840936  | -0.212385 | -1.917554 |
| 18 | 1  | 0 | -0.978442  | -1.482045 | -3.109985 |
| 19 | 6  | 0 | 1.087730   | -2.840503 | -0.806945 |
| 20 | 6  | 0 | 1.890176   | -3.649593 | -0.019498 |
| 21 | 6  | 0 | 1.337080   | -4.368265 | 1.083519  |
| 22 | 6  | 0 | -0.000599  | -4.331067 | 1.385007  |
| 23 | 1  | 0 | 1.472582   | -2.287281 | -1.651225 |
| 24 | 1  | 0 | -0.393616  | -4.885276 | 2.227147  |
| 25 | 1  | 0 | 2.024521   | -4.956583 | 1.675592  |
| 26 | 8  | 0 | 3.202185   | -3.838773 | -0.215315 |
| 27 | 6  | 0 | 3.779539   | -3.240396 | -1.378017 |
| 28 | 1  | 0 | 3.298476   | -3.638051 | -2.275133 |
| 29 | 1  | 0 | 3.688956   | -2.153493 | -1.341374 |
| 30 | 1  | 0 | 4.828900   | -3.512495 | -1.358330 |
| 31 | 30 | 0 | 1.220848   | -0.796085 | 0.638654  |
| 32 | 8  | 0 | 1.180854   | 0.116714  | -1.017257 |
| 33 | 8  | 0 | 2.807947   | -0.890411 | 1.610960  |
| 34 | 6  | 0 | -5.714921  | 1.467111  | 0.848393  |
| 35 | 6  | 0 | -6.785686  | 1.269634  | -0.169489 |
| 36 | 6  | 0 | -4.373640  | 1.241686  | 0.364407  |
| 37 | 6  | 0 | -4.148193  | 0.874120  | -1.050257 |
| 38 | 6  | 0 | -6.465080  | 1.100331  | -1.515769 |
| 39 | 8  | 0 | -5.166259  | 1.158601  | -1.961194 |
| 40 | 8  | 0 | -6.001393  | 1.728738  | 2.014864  |
| 41 | 6  | 0 | -3.337335  | 1.127582  | 1.284080  |
| 42 | 6  | 0 | -2.062693  | 0.629852  | 1.053811  |
| 43 | 1  | 0 | -3.261659  | 1.383533  | -1.435072 |
| 44 | 1  | 0 | -3.622591  | 1.343993  | 2.309100  |
| 45 | 6  | 0 | -1.216294  | 0.203313  | 2.105596  |
| 46 | 8  | 0 | -0.175741  | -0.491366 | 1.956075  |
| 47 | 1  | 0 | -1.684732  | 0.416069  | 0.065140  |
| 48 | 8  | 0 | -1.597221  | 0.502618  | 3.347404  |
| 49 | 6  | 0 | -0.719655  | 0.080745  | 4.401869  |
| 50 | 1  | 0 | -0.655874  | -1.005491 | 4.430516  |
| 51 | 1  | 0 | 0.274743   | 0.494925  | 4.252716  |
| 52 | 1  | 0 | -1.168158  | 0.464991  | 5.312438  |
| 53 | 6  | 0 | -8.128542  | 1.251149  | 0.211577  |
| 54 | 6  | 0 | -9.127966  | 1.069953  | -0.732331 |
| 55 | 6  | 0 | -8.785480  | 0.910987  | -2.076975 |
| 56 | 6  | 0 | -7.455325  | 0.925797  | -2.476469 |
| 57 | 1  | 0 | -8.347350  | 1.393488  | 1.261839  |
| 58 | 1  | 0 | -10.167268 | 1.058143  | -0.431598 |
| 59 | 1  | 0 | -9.560590  | 0.774477  | -2.820360 |
| 60 | 1  | 0 | -7.167849  | 0.811086  | -3.512866 |
| 61 | 6  | 0 | 3.884869   | -0.662440 | 0.862692  |
| 62 | 6  | 0 | 5.010595   | -1.518579 | 1.070467  |
| 63 | 6  | 0 | 6.135025   | -1.419828 | 0.306290  |
| 64 | 6  | 0 | 6.211645   | -0.467673 | -0.744611 |
| 65 | 6  | 0 | 5.121390   | 0.427809  | -0.934614 |
| 66 | 6  | 0 | 3.969595   | 0.363122  | -0.082171 |
| 67 | 6  | 0 | 2.967630   | 1.475331  | -0.152626 |



|    |   |   |           |           |           |
|----|---|---|-----------|-----------|-----------|
| 68 | 6 | 0 | 3.379349  | 2.777577  | 0.292761  |
| 69 | 6 | 0 | 2.518055  | 3.898554  | 0.135963  |
| 70 | 6 | 0 | 1.241005  | 3.703792  | -0.450632 |
| 71 | 6 | 0 | 1.683696  | 1.318826  | -0.668007 |
| 72 | 6 | 0 | 0.838701  | 2.457179  | -0.827790 |
| 73 | 1 | 0 | 4.915572  | -2.261184 | 1.852263  |
| 74 | 1 | 0 | 6.979199  | -2.079093 | 0.479017  |
| 75 | 6 | 0 | 7.345055  | -0.391400 | -1.590358 |
| 76 | 6 | 0 | 5.224647  | 1.375688  | -1.989871 |
| 77 | 6 | 0 | 4.640999  | 2.998767  | 0.910278  |
| 78 | 6 | 0 | 2.936640  | 5.180610  | 0.569101  |
| 79 | 1 | 0 | 0.586399  | 4.558501  | -0.579658 |
| 80 | 1 | 0 | -0.142189 | 2.289433  | -1.257143 |
| 81 | 6 | 0 | 4.163788  | 5.361319  | 1.151437  |
| 82 | 6 | 0 | 5.018464  | 4.250625  | 1.326581  |
| 83 | 6 | 0 | 6.332590  | 1.423027  | -2.798039 |
| 84 | 6 | 0 | 7.412204  | 0.533601  | -2.600259 |
| 85 | 1 | 0 | 2.259582  | 6.016710  | 0.432888  |
| 86 | 1 | 0 | 4.476173  | 6.343903  | 1.481686  |
| 87 | 1 | 0 | 5.983533  | 4.387215  | 1.798797  |
| 88 | 1 | 0 | 5.302506  | 2.157252  | 1.061519  |
| 89 | 1 | 0 | 4.403377  | 2.060256  | -2.154804 |
| 90 | 1 | 0 | 6.379769  | 2.151862  | -3.597941 |
| 91 | 1 | 0 | 8.282708  | 0.584625  | -3.242068 |
| 92 | 1 | 0 | 8.162603  | -1.083314 | -1.418867 |

**trans-exo-TS2-Re**

Standard orientation:

| Center Number | Atomic Number | Atomic Type | Coordinates (Angstroms) |           |           |
|---------------|---------------|-------------|-------------------------|-----------|-----------|
|               |               |             | X                       | Y         | Z         |
| 1             | 6             | 0           | 1.019517                | 3.782979  | -0.520853 |
| 2             | 6             | 0           | 2.323724                | 4.010249  | -0.010425 |
| 3             | 6             | 0           | 3.201847                | 2.902410  | 0.148919  |
| 4             | 6             | 0           | 2.779935                | 1.580173  | -0.222816 |
| 5             | 6             | 0           | 0.607953                | 2.519248  | -0.823990 |
| 6             | 6             | 0           | 1.471744                | 1.394664  | -0.662970 |
| 7             | 6             | 0           | 2.752484                | 5.311887  | 0.347385  |
| 8             | 6             | 0           | 4.005319                | 5.525409  | 0.860197  |
| 9             | 6             | 0           | 4.876283                | 4.428344  | 1.040623  |
| 10            | 6             | 0           | 4.489434                | 3.157783  | 0.695750  |
| 11            | 6             | 0           | 3.789133                | 0.475053  | -0.159318 |
| 12            | 6             | 0           | 4.914191                | 0.527868  | -1.047963 |
| 13            | 6             | 0           | 6.021420                | -0.348733 | -0.866675 |
| 14            | 6             | 0           | 3.741524                | -0.527993 | 0.811703  |
| 15            | 6             | 0           | 4.878131                | -1.374524 | 0.997113  |
| 16            | 6             | 0           | 5.982404                | -1.280339 | 0.203722  |
| 17            | 6             | 0           | 4.975272                | 1.447567  | -2.131297 |
| 18            | 6             | 0           | 6.058263                | 1.486096  | -2.973190 |
| 19            | 6             | 0           | 7.154582                | 0.615423  | -2.783699 |
| 20            | 6             | 0           | 7.128295                | -0.282618 | -1.747784 |
| 21            | 1             | 0           | 2.062423                | 6.137105  | 0.209741  |
| 22            | 1             | 0           | 4.325239                | 6.523168  | 1.132787  |
| 23            | 1             | 0           | 5.861493                | 4.590323  | 1.460397  |
| 24            | 1             | 0           | 5.164402                | 2.327831  | 0.850897  |
| 25            | 1             | 0           | 4.140705                | 2.117012  | -2.291071 |
| 26            | 1             | 0           | 6.072175                | 2.193073  | -3.793704 |
| 27            | 1             | 0           | 8.005034                | 0.659083  | -3.452401 |
| 28            | 1             | 0           | 7.958637                | -0.960786 | -1.582214 |
| 29            | 1             | 0           | 6.835385                | -1.930776 | 0.366192  |

Imaginary frequency: -87.4201 cm<sup>-1</sup>

Electronic energy  $E = -4188.785104$  a.u.

Enthalpy  $H = -4188.738336$  a.u.

Entropy  $S = 205.462$  cal/mol/K

Gibbs free energy  $G = -4188.865687$  a.u.

Total free energy in solution  $E_{\text{sol}} = -4190.38190$  a.u.

|    |    |   |            |           |           |
|----|----|---|------------|-----------|-----------|
| 30 | 1  | 0 | 4.814793   | -2.100214 | 1.798129  |
| 31 | 1  | 0 | 0.352022   | 4.627544  | -0.651111 |
| 32 | 1  | 0 | -0.392415  | 2.324949  | -1.191694 |
| 33 | 8  | 0 | 2.706144   | -0.732823 | 1.622455  |
| 34 | 6  | 0 | -1.896355  | -2.359731 | 0.270094  |
| 35 | 7  | 0 | -3.493087  | -1.135769 | -0.946643 |
| 36 | 6  | 0 | -3.144209  | -1.657939 | 0.226995  |
| 37 | 6  | 0 | -4.112574  | -1.778140 | 1.360143  |
| 38 | 6  | 0 | -0.930835  | -2.227946 | -0.710828 |
| 39 | 6  | 0 | -2.763400  | -1.558706 | -2.162445 |
| 40 | 6  | 0 | -1.248341  | -1.530360 | -1.989729 |
| 41 | 1  | 0 | -3.599427  | -1.703923 | 2.317597  |
| 42 | 1  | 0 | -4.582198  | -2.763062 | 1.269329  |
| 43 | 1  | 0 | -4.893211  | -1.026959 | 1.312704  |
| 44 | 6  | 0 | 0.268496   | -2.791770 | -0.189736 |
| 45 | 6  | 0 | -0.048826  | -3.298244 | 1.098166  |
| 46 | 7  | 0 | -1.366105  | -3.024960 | 1.358196  |
| 47 | 1  | 0 | -1.822590  | -3.175440 | 2.240243  |
| 48 | 1  | 0 | -3.083712  | -0.915022 | -2.976840 |
| 49 | 1  | 0 | -3.086340  | -2.579426 | -2.381908 |
| 50 | 1  | 0 | -0.821953  | -0.523077 | -1.962846 |
| 51 | 1  | 0 | -0.795146  | -2.045383 | -2.839565 |
| 52 | 6  | 0 | 1.559369   | -2.974375 | -0.746158 |
| 53 | 6  | 0 | 2.486712   | -3.663833 | 0.005711  |
| 54 | 6  | 0 | 2.153494   | -4.160436 | 1.299481  |
| 55 | 6  | 0 | 0.911107   | -3.992381 | 1.856133  |
| 56 | 1  | 0 | 1.792054   | -2.541276 | -1.706980 |
| 57 | 1  | 0 | 0.687262   | -4.371117 | 2.844263  |
| 58 | 1  | 0 | 2.937950   | -4.670351 | 1.842136  |
| 59 | 8  | 0 | 3.747060   | -3.928548 | -0.387926 |
| 60 | 6  | 0 | 4.166614   | -3.349427 | -1.619456 |
| 61 | 1  | 0 | 3.611669   | -3.789584 | -2.452560 |
| 62 | 1  | 0 | 4.032175   | -2.266729 | -1.599078 |
| 63 | 1  | 0 | 5.223226   | -3.579459 | -1.713389 |
| 64 | 30 | 0 | 1.049322   | -0.607518 | 0.790399  |
| 65 | 6  | 0 | -5.752300  | 1.685300  | 0.246030  |
| 66 | 6  | 0 | -6.905012  | 1.259195  | -0.591671 |
| 67 | 6  | 0 | -4.507929  | 0.940347  | 0.045200  |
| 68 | 6  | 0 | -4.491601  | -0.068062 | -1.077670 |
| 69 | 6  | 0 | -6.849660  | 0.057784  | -1.295515 |
| 70 | 8  | 0 | -5.738160  | -0.747312 | -1.237347 |
| 71 | 8  | 0 | -5.865804  | 2.606040  | 1.045412  |
| 72 | 6  | 0 | -3.471913  | 1.174223  | 0.912572  |
| 73 | 6  | 0 | -2.184489  | 0.595285  | 0.894537  |
| 74 | 1  | 0 | -4.254681  | 0.421446  | -2.027079 |
| 75 | 1  | 0 | -3.731274  | 1.811218  | 1.753241  |
| 76 | 6  | 0 | -1.407232  | 0.456573  | 2.061206  |
| 77 | 8  | 0 | -0.292258  | -0.133844 | 2.121821  |
| 78 | 1  | 0 | -1.681905  | 0.312161  | -0.014429 |
| 79 | 8  | 0 | -1.950974  | 0.891710  | 3.201953  |
| 80 | 6  | 0 | -1.127768  | 0.802272  | 4.373755  |
| 81 | 1  | 0 | -0.903908  | -0.237786 | 4.602741  |
| 82 | 1  | 0 | -0.196939  | 1.344502  | 4.223418  |
| 83 | 1  | 0 | -1.714961  | 1.253769  | 5.167235  |
| 84 | 6  | 0 | -8.073792  | 2.020237  | -0.635388 |
| 85 | 6  | 0 | -9.164611  | 1.587896  | -1.374355 |
| 86 | 6  | 0 | -9.092561  | 0.377782  | -2.068267 |
| 87 | 6  | 0 | -7.937564  | -0.393782 | -2.034599 |
| 88 | 1  | 0 | -8.092507  | 2.941694  | -0.068160 |
| 89 | 1  | 0 | -10.069031 | 2.180482  | -1.409764 |
| 90 | 1  | 0 | -9.943077  | 0.033876  | -2.643220 |
| 91 | 1  | 0 | -7.861924  | -1.334361 | -2.563302 |

92 8 0 0.962441 0.176012 -0.930670

---

**trans-exo-TS1-Si**

Standard orientation:

Imaginary frequency: -287.7373 cm<sup>-1</sup>  
Electronic energy  $E = -4188.790934$  a.u.  
Enthalpy  $H = -4188.744004$  a.u.  
Entropy  $S = 267.754$  cal/mol/K  
Gibbs free energy  $G = -4188.871222$  a.u.  
Total free energy in solution  $E_{\text{sol}} = -4190.38429$  a.u.

---

| Center Number | Atomic Number | Atomic Type | Coordinates (Angstroms) |           |           |
|---------------|---------------|-------------|-------------------------|-----------|-----------|
|               |               |             | X                       | Y         | Z         |
| 1             | 6             | 0           | -5.574534               | 1.769776  | -0.366558 |
| 2             | 6             | 0           | -6.633934               | 1.441157  | 0.624535  |
| 3             | 6             | 0           | -4.240885               | 1.378493  | 0.033216  |
| 4             | 6             | 0           | -4.043852               | 0.695367  | 1.278621  |
| 5             | 6             | 0           | -6.298372               | 0.946010  | 1.882762  |
| 6             | 8             | 0           | -4.987504               | 0.765701  | 2.258540  |
| 7             | 8             | 0           | -5.854573               | 2.288157  | -1.444407 |
| 8             | 6             | 0           | -3.196156               | 1.476165  | -0.906909 |
| 9             | 6             | 0           | -1.963273               | 0.878205  | -0.844500 |
| 10            | 1             | 0           | -3.065463               | 0.831542  | 1.730840  |
| 11            | 1             | 0           | -3.465004               | 2.005183  | -1.815850 |
| 12            | 6             | 0           | -1.071776               | 0.854468  | -1.963367 |
| 13            | 8             | 0           | -1.359753               | 1.663294  | -2.973188 |
| 14            | 1             | 0           | -1.616163               | 0.318579  | 0.011047  |
| 15            | 8             | 0           | -0.083025               | 0.090873  | -2.064180 |
| 16            | 6             | 0           | -7.982385               | 1.637301  | 0.317134  |
| 17            | 6             | 0           | -8.965743               | 1.343451  | 1.248031  |
| 18            | 6             | 0           | -8.604430               | 0.853808  | 2.506483  |
| 19            | 6             | 0           | -7.270373               | 0.653462  | 2.832810  |
| 20            | 1             | 0           | -8.216027               | 2.031492  | -0.663285 |
| 21            | 1             | 0           | -10.008966              | 1.497524  | 1.006369  |
| 22            | 1             | 0           | -9.369272               | 0.627219  | 3.238281  |
| 23            | 1             | 0           | -6.965777               | 0.280833  | 3.801314  |
| 24            | 6             | 0           | -0.429742               | 1.668176  | -4.070743 |
| 25            | 1             | 0           | -0.405674               | 0.689904  | -4.546726 |
| 26            | 1             | 0           | 0.564942                | 1.924113  | -3.710885 |
| 27            | 1             | 0           | -0.806162               | 2.422590  | -4.753681 |
| 28            | 6             | 0           | 3.402010                | 0.372349  | 1.010003  |
| 29            | 6             | 0           | 2.231334                | -0.173471 | 1.536117  |
| 30            | 6             | 0           | 3.393486                | 1.212359  | -0.226691 |
| 31            | 6             | 0           | 3.645862                | 2.617262  | -0.135231 |
| 32            | 6             | 0           | 3.208444                | 0.628780  | -1.479045 |
| 33            | 6             | 0           | 3.346564                | 1.427915  | -2.654447 |
| 34            | 8             | 0           | 1.038559                | -0.068494 | 0.935989  |
| 35            | 8             | 0           | 2.893875                | -0.664457 | -1.626197 |
| 36            | 30            | 0           | 1.189429                | -0.737818 | -0.822365 |
| 37            | 6             | 0           | 2.289469                | -0.910945 | 2.757510  |
| 38            | 6             | 0           | 4.648681                | 0.115420  | 1.666423  |
| 39            | 6             | 0           | 3.616973                | 2.763742  | -2.577545 |
| 40            | 6             | 0           | 3.761637                | 3.401461  | -1.317269 |
| 41            | 6             | 0           | 4.688292                | -0.644087 | 2.870314  |
| 42            | 6             | 0           | 3.471112                | -1.138315 | 3.403601  |
| 43            | 1             | 0           | 1.352067                | -1.282173 | 3.155774  |
| 44            | 1             | 0           | 3.494669                | -1.701511 | 4.330157  |
| 45            | 6             | 0           | 5.928803                | -0.894177 | 3.508670  |
| 46            | 6             | 0           | 5.885312                | 0.582549  | 1.139774  |
| 47            | 6             | 0           | 3.788644                | 3.277692  | 1.115160  |
| 48            | 6             | 0           | 4.019848                | 4.790222  | -1.218150 |

|    |   |   |           |           |           |
|----|---|---|-----------|-----------|-----------|
| 49 | 1 | 0 | 3.726039  | 3.357784  | -3.478758 |
| 50 | 1 | 0 | 3.231027  | 0.921568  | -3.605182 |
| 51 | 6 | 0 | 7.100964  | -0.422947 | 2.978852  |
| 52 | 6 | 0 | 7.071532  | 0.319856  | 1.776082  |
| 53 | 6 | 0 | 4.034519  | 4.626099  | 1.180745  |
| 54 | 6 | 0 | 4.156353  | 5.397546  | 0.003258  |
| 55 | 1 | 0 | 5.876318  | 1.147216  | 0.217700  |
| 56 | 1 | 0 | 7.998044  | 0.685436  | 1.350777  |
| 57 | 1 | 0 | 8.044616  | -0.618426 | 3.472166  |
| 58 | 1 | 0 | 5.928970  | -1.469976 | 4.427716  |
| 59 | 1 | 0 | 3.691177  | 2.697394  | 2.022939  |
| 60 | 1 | 0 | 4.134747  | 5.105358  | 2.146866  |
| 61 | 1 | 0 | 4.353222  | 6.460099  | 0.069282  |
| 62 | 1 | 0 | 4.106295  | 5.365020  | -2.133829 |
| 63 | 6 | 0 | -2.524503 | -2.428218 | -0.404296 |
| 64 | 7 | 0 | -3.765780 | -1.054460 | 1.057739  |
| 65 | 6 | 0 | -3.664036 | -1.589288 | -0.123932 |
| 66 | 6 | 0 | -4.673834 | -1.312456 | -1.195162 |
| 67 | 6 | 0 | -1.395707 | -2.395771 | 0.395524  |
| 68 | 6 | 0 | -2.919470 | -1.595676 | 2.131239  |
| 69 | 6 | 0 | -1.445705 | -1.766269 | 1.749235  |
| 70 | 1 | 0 | -4.281534 | -0.617915 | -1.939880 |
| 71 | 1 | 0 | -4.916269 | -2.257700 | -1.688590 |
| 72 | 1 | 0 | -5.588305 | -0.906624 | -0.772615 |
| 73 | 6 | 0 | -0.323190 | -2.897556 | -0.390693 |
| 74 | 6 | 0 | -0.871299 | -3.266864 | -1.641071 |
| 75 | 7 | 0 | -2.209892 | -2.977978 | -1.629434 |
| 76 | 1 | 0 | -2.830456 | -3.070555 | -2.414066 |
| 77 | 1 | 0 | -3.041160 | -0.948831 | 2.999619  |
| 78 | 1 | 0 | -3.338295 | -2.573311 | 2.381824  |
| 79 | 1 | 0 | -0.871630 | -0.834532 | 1.749580  |
| 80 | 1 | 0 | -0.977819 | -2.413117 | 2.496187  |
| 81 | 6 | 0 | -0.066209 | -3.811284 | -2.656604 |
| 82 | 6 | 0 | 1.077335  | -3.011273 | -0.156304 |
| 83 | 6 | 0 | 1.861826  | -3.554053 | -1.169062 |
| 84 | 6 | 0 | 1.277887  | -3.937114 | -2.412401 |
| 85 | 8 | 0 | 3.178462  | -3.762372 | -1.086418 |
| 86 | 6 | 0 | 3.866711  | -3.248187 | 0.057992  |
| 87 | 1 | 0 | 3.514658  | -3.737026 | 0.969146  |
| 88 | 1 | 0 | 4.913394  | -3.484536 | -0.104446 |
| 89 | 1 | 0 | 1.488663  | -2.781912 | 0.819029  |
| 90 | 1 | 0 | -0.483257 | -4.099872 | -3.612718 |
| 91 | 1 | 0 | 1.948516  | -4.329503 | -3.164053 |
| 92 | 1 | 0 | 3.733236  | -2.168173 | 0.114982  |

**trans-exo-IM1-Si**

Standard orientation:

| Center Number | Atomic Number | Atomic Type | Coordinates (Angstroms) |          |           |
|---------------|---------------|-------------|-------------------------|----------|-----------|
|               |               |             | X                       | Y        | Z         |
| 1             | 6             | 0           | -5.614360               | 1.824756 | -0.269597 |
| 2             | 6             | 0           | -6.673736               | 1.397848 | 0.688433  |
| 3             | 6             | 0           | -4.279239               | 1.405692 | 0.081352  |
| 4             | 6             | 0           | -4.046353               | 0.628492 | 1.317976  |
| 5             | 6             | 0           | -6.336502               | 0.827044 | 1.914859  |
| 6             | 8             | 0           | -5.028281               | 0.678923 | 2.308081  |
| 7             | 8             | 0           | -5.910284               | 2.427265 | -1.299812 |
| 8             | 6             | 0           | -3.257623               | 1.556219 | -0.850469 |
| 9             | 6             | 0           | -2.001012               | 0.969971 | -0.823594 |
| 10            | 1             | 0           | -3.124675               | 0.960232 | 1.800895  |

Imaginary frequency: none

Electronic energy  $E = -4188.791786$  a.u.

Enthalpy  $H = -4188.744709$  a.u.

Entropy  $S = 268.080$  cal/mol/K

Gibbs free energy  $G = -4188.872082$  a.u.

Total free energy in solution  $E_{\text{sol}} = -4190.38979$  a.u.

|    |    |   |            |           |           |
|----|----|---|------------|-----------|-----------|
| 11 | 1  | 0 | -3.541376  | 2.110749  | -1.739630 |
| 12 | 6  | 0 | -1.139123  | 0.965387  | -1.946952 |
| 13 | 8  | 0 | -1.482227  | 1.735716  | -2.977589 |
| 14 | 1  | 0 | -1.631127  | 0.413631  | 0.024589  |
| 15 | 8  | 0 | -0.105918  | 0.249985  | -2.061533 |
| 16 | 6  | 0 | -8.022656  | 1.568931  | 0.371943  |
| 17 | 6  | 0 | -9.011877  | 1.180811  | 1.262700  |
| 18 | 6  | 0 | -8.652258  | 0.618016  | 2.489238  |
| 19 | 6  | 0 | -7.315841  | 0.438581  | 2.822633  |
| 20 | 1  | 0 | -8.253137  | 2.022954  | -0.583072 |
| 21 | 1  | 0 | -10.055674 | 1.318240  | 1.013583  |
| 22 | 1  | 0 | -9.418829  | 0.317257  | 3.192139  |
| 23 | 1  | 0 | -7.014685  | 0.012248  | 3.770079  |
| 24 | 6  | 0 | -0.566320  | 1.765828  | -4.082583 |
| 25 | 1  | 0 | -0.493439  | 0.781732  | -4.541707 |
| 26 | 1  | 0 | 0.418503   | 2.081009  | -3.743123 |
| 27 | 1  | 0 | -0.987253  | 2.485532  | -4.777446 |
| 28 | 6  | 0 | 3.480858   | 0.277816  | 0.999619  |
| 29 | 6  | 0 | 2.298715   | -0.256146 | 1.512057  |
| 30 | 6  | 0 | 3.481539   | 1.195203  | -0.180266 |
| 31 | 6  | 0 | 3.788699   | 2.581169  | -0.004868 |
| 32 | 6  | 0 | 3.245175   | 0.701209  | -1.461824 |
| 33 | 6  | 0 | 3.378180   | 1.570618  | -2.586761 |
| 34 | 8  | 0 | 1.101145   | -0.072419 | 0.941704  |
| 35 | 8  | 0 | 2.882979   | -0.570708 | -1.680980 |
| 36 | 30 | 0 | 1.177292   | -0.587279 | -0.872370 |
| 37 | 6  | 0 | 2.348732   | -1.068979 | 2.685207  |
| 38 | 6  | 0 | 4.726790   | -0.066594 | 1.615376  |
| 39 | 6  | 0 | 3.698130   | 2.888211  | -2.430983 |
| 40 | 6  | 0 | 3.901292   | 3.436149  | -1.136775 |
| 41 | 6  | 0 | 4.757483   | -0.902429 | 2.768007  |
| 42 | 6  | 0 | 3.531280   | -1.381834 | 3.293285  |
| 43 | 1  | 0 | 1.404695   | -1.426944 | 3.080012  |
| 44 | 1  | 0 | 3.547785   | -2.001774 | 4.183052  |
| 45 | 6  | 0 | 5.997769   | -1.239694 | 3.365116  |
| 46 | 6  | 0 | 5.971563   | 0.386667  | 1.095784  |
| 47 | 6  | 0 | 3.989474   | 3.152349  | 1.281016  |
| 48 | 6  | 0 | 4.212573   | 4.805553  | -0.955819 |
| 49 | 1  | 0 | 3.800996   | 3.537202  | -3.294067 |
| 50 | 1  | 0 | 3.216055   | 1.132956  | -3.564330 |
| 51 | 6  | 0 | 7.178169   | -0.780259 | 2.843575  |
| 52 | 6  | 0 | 7.157246   | 0.039239  | 1.691248  |
| 53 | 6  | 0 | 4.287623   | 4.483909  | 1.426172  |
| 54 | 6  | 0 | 4.405278   | 5.326035  | 0.297803  |
| 55 | 1  | 0 | 5.968799   | 1.009272  | 0.211747  |
| 56 | 1  | 0 | 8.089954   | 0.396440  | 1.272427  |
| 57 | 1  | 0 | 8.121698   | -1.042204 | 3.305232  |
| 58 | 1  | 0 | 5.990908   | -1.872199 | 4.246091  |
| 59 | 1  | 0 | 3.895799   | 2.517612  | 2.152054  |
| 60 | 1  | 0 | 4.432153   | 4.895015  | 2.417766  |
| 61 | 1  | 0 | 4.642368   | 6.374501  | 0.426424  |
| 62 | 1  | 0 | 4.294126   | 5.436270  | -1.834410 |
| 63 | 6  | 0 | -2.605216  | -2.345652 | -0.371755 |
| 64 | 7  | 0 | -3.689018  | -0.861266 | 1.081839  |
| 65 | 6  | 0 | -3.682471  | -1.448418 | -0.094492 |
| 66 | 6  | 0 | -4.721790  | -1.190995 | -1.140574 |
| 67 | 6  | 0 | -1.430670  | -2.313634 | 0.372495  |
| 68 | 6  | 0 | -2.865419  | -1.459716 | 2.147866  |
| 69 | 6  | 0 | -1.413094  | -1.686375 | 1.725471  |
| 70 | 1  | 0 | -4.347428  | -0.509751 | -1.905836 |
| 71 | 1  | 0 | -4.966887  | -2.150193 | -1.604439 |
| 72 | 1  | 0 | -5.629669  | -0.780136 | -0.709897 |

|    |   |   |           |           |           |
|----|---|---|-----------|-----------|-----------|
| 73 | 6 | 0 | -0.401493 | -2.816431 | -0.460674 |
| 74 | 6 | 0 | -1.012766 | -3.186468 | -1.682214 |
| 75 | 7 | 0 | -2.348584 | -2.909436 | -1.607408 |
| 76 | 1 | 0 | -2.995934 | -2.977548 | -2.372862 |
| 77 | 1 | 0 | -2.947126 | -0.813315 | 3.018864  |
| 78 | 1 | 0 | -3.325199 | -2.420119 | 2.388580  |
| 79 | 1 | 0 | -0.797282 | -0.781769 | 1.711823  |
| 80 | 1 | 0 | -0.954813 | -2.357900 | 2.456474  |
| 81 | 6 | 0 | -0.257359 | -3.721914 | -2.742260 |
| 82 | 6 | 0 | 1.009374  | -2.930602 | -0.292538 |
| 83 | 6 | 0 | 1.740106  | -3.472510 | -1.342241 |
| 84 | 6 | 0 | 1.094855  | -3.843727 | -2.562523 |
| 85 | 8 | 0 | 3.053514  | -3.702493 | -1.325837 |
| 86 | 6 | 0 | 3.800351  | -3.250396 | -0.190326 |
| 87 | 1 | 0 | 3.462325  | -3.758782 | 0.715389  |
| 88 | 1 | 0 | 4.831523  | -3.516166 | -0.399342 |
| 89 | 1 | 0 | 1.466221  | -2.714383 | 0.665294  |
| 90 | 1 | 0 | -0.720645 | -4.007027 | -3.677700 |
| 91 | 1 | 0 | 1.729842  | -4.233320 | -3.346085 |
| 92 | 1 | 0 | 3.704006  | -2.169744 | -0.095608 |

**trans-exo-TS2-Si**

Standard orientation:

| Center Number | Atomic Number | Atomic Type | Coordinates (Angstroms) |           |           |
|---------------|---------------|-------------|-------------------------|-----------|-----------|
|               |               |             | X                       | Y         | Z         |
| 1             | 6             | 0           | 1.394413                | -1.167004 | 0.982298  |
| 2             | 7             | 0           | 3.252640                | -1.046322 | -0.442890 |
| 3             | 6             | 0           | 2.739346                | -0.705672 | 0.738650  |
| 4             | 6             | 0           | 3.610409                | -0.351289 | 1.905087  |
| 5             | 6             | 0           | 0.855739                | -2.229707 | 0.311035  |
| 6             | 6             | 0           | 2.366535                | -1.641362 | -1.465588 |
| 7             | 6             | 0           | 1.559422                | -2.788289 | -0.876708 |
| 8             | 1             | 0           | 4.478265                | 0.229967  | 1.611271  |
| 9             | 1             | 0           | 3.038254                | 0.196645  | 2.651201  |
| 10            | 1             | 0           | 3.958244                | -1.292494 | 2.340589  |
| 11            | 6             | 0           | -0.385389               | -2.565953 | 0.937716  |
| 12            | 6             | 0           | -0.580727               | -1.634349 | 1.971890  |
| 13            | 7             | 0           | 0.489208                | -0.702517 | 1.957903  |
| 14            | 1             | 0           | 0.816833                | -0.312591 | 2.831639  |
| 15            | 1             | 0           | 1.678203                | -0.869460 | -1.828802 |
| 16            | 1             | 0           | 3.001809                | -1.980830 | -2.279913 |
| 17            | 1             | 0           | 0.842100                | -3.142200 | -1.617942 |
| 18            | 1             | 0           | 2.204073                | -3.628217 | -0.599583 |
| 19            | 6             | 0           | -1.356147               | -3.526717 | 0.649399  |
| 20            | 6             | 0           | -2.512793               | -3.532500 | 1.411205  |
| 21            | 6             | 0           | -2.689280               | -2.600248 | 2.458334  |
| 22            | 6             | 0           | -1.737106               | -1.636117 | 2.741795  |
| 23            | 1             | 0           | -1.257622               | -4.222224 | -0.171799 |
| 24            | 1             | 0           | -1.919604               | -0.880175 | 3.490386  |
| 25            | 1             | 0           | -3.602207               | -2.608311 | 3.035358  |
| 26            | 8             | 0           | -3.436805               | -4.469761 | 1.089680  |
| 27            | 6             | 0           | 6.175377                | 1.373457  | -0.731488 |
| 28            | 6             | 0           | 7.188063                | 0.290426  | -0.856792 |
| 29            | 6             | 0           | 4.781838                | 0.926492  | -0.636029 |

Imaginary frequency: -144.6322 cm<sup>-1</sup>  
 Electronic energy  $E = -4188.782463$  a.u.  
 Enthalpy  $H = -4188.736028$  a.u.  
 Entropy  $S = 265.428$  cal/mol/K  
 Gibbs free energy  $G = -4188.862141$  a.u.  
 Total free energy in solution  $E_{\text{sol}} = -4190.37792$  a.u.

|    |    |   |           |           |           |
|----|----|---|-----------|-----------|-----------|
| 30 | 6  | 0 | 4.539029  | -0.531349 | -0.917529 |
| 31 | 6  | 0 | 6.824251  | -1.036708 | -0.631184 |
| 32 | 8  | 0 | 5.527948  | -1.379131 | -0.333409 |
| 33 | 8  | 0 | 6.513647  | 2.548938  | -0.695397 |
| 34 | 6  | 0 | 3.841661  | 1.838563  | -0.244090 |
| 35 | 6  | 0 | 2.453340  | 1.670088  | -0.012933 |
| 36 | 1  | 0 | 4.541779  | -0.715626 | -1.996134 |
| 37 | 1  | 0 | 4.266978  | 2.799455  | 0.031006  |
| 38 | 6  | 0 | 1.778958  | 2.577871  | 0.842143  |
| 39 | 8  | 0 | 0.571870  | 2.476835  | 1.191174  |
| 40 | 1  | 0 | 1.805996  | 1.041036  | -0.606683 |
| 41 | 8  | 0 | 2.502438  | 3.569156  | 1.363577  |
| 42 | 6  | 0 | 1.806524  | 4.483127  | 2.222574  |
| 43 | 1  | 0 | 1.410681  | 3.959752  | 3.090688  |
| 44 | 1  | 0 | 0.988780  | 4.957392  | 1.684721  |
| 45 | 1  | 0 | 2.551135  | 5.215125  | 2.518991  |
| 46 | 6  | 0 | 8.525146  | 0.593863  | -1.118389 |
| 47 | 6  | 0 | 9.478381  | -0.411817 | -1.158409 |
| 48 | 6  | 0 | 9.095983  | -1.734586 | -0.922091 |
| 49 | 6  | 0 | 7.770772  | -2.055589 | -0.658278 |
| 50 | 1  | 0 | 8.780740  | 1.633829  | -1.274025 |
| 51 | 1  | 0 | 10.513555 | -0.174885 | -1.364844 |
| 52 | 1  | 0 | 9.837070  | -2.523521 | -0.947564 |
| 53 | 1  | 0 | 7.454447  | -3.073345 | -0.473779 |
| 54 | 6  | 0 | -4.766050 | -4.266226 | 1.552072  |
| 55 | 1  | 0 | -5.378870 | -4.984164 | 1.014096  |
| 56 | 1  | 0 | -4.841454 | -4.456941 | 2.625887  |
| 57 | 1  | 0 | -5.105054 | -3.255477 | 1.318245  |
| 58 | 30 | 0 | -0.614278 | 0.973781  | 0.821139  |
| 59 | 6  | 0 | -1.787712 | -0.321486 | -1.200458 |
| 60 | 6  | 0 | -2.981200 | 1.759113  | 1.161839  |
| 61 | 6  | 0 | -1.665701 | -1.462030 | -2.051867 |
| 62 | 6  | 0 | -2.711009 | -2.306296 | -2.286449 |
| 63 | 6  | 0 | -3.968757 | -2.071223 | -1.674419 |
| 64 | 6  | 0 | -4.131963 | -0.895778 | -0.888220 |
| 65 | 6  | 0 | -3.046199 | 0.022161  | -0.703628 |
| 66 | 6  | 0 | -3.361346 | 1.368535  | -0.121236 |
| 67 | 6  | 0 | -3.488976 | 2.976185  | 1.710983  |
| 68 | 6  | 0 | -4.299558 | 3.799135  | 0.988534  |
| 69 | 6  | 0 | -4.172275 | 2.256496  | -0.906597 |
| 70 | 6  | 0 | -4.650376 | 3.474909  | -0.348616 |
| 71 | 6  | 0 | -5.057861 | -2.957713 | -1.861143 |
| 72 | 6  | 0 | -5.413111 | -0.665286 | -0.311815 |
| 73 | 6  | 0 | -6.282093 | -2.701331 | -1.299242 |
| 74 | 6  | 0 | -6.453096 | -1.539274 | -0.512173 |
| 75 | 6  | 0 | -4.523747 | 1.968692  | -2.253952 |
| 76 | 6  | 0 | -5.302363 | 2.830015  | -2.985814 |
| 77 | 6  | 0 | -5.784964 | 4.030204  | -2.419310 |
| 78 | 6  | 0 | -5.458265 | 4.340677  | -1.124711 |
| 79 | 8  | 0 | -2.141476 | 1.039319  | 1.916816  |
| 80 | 1  | 0 | -4.154924 | 1.057924  | -2.705630 |
| 81 | 1  | 0 | -5.547342 | 2.586342  | -4.012417 |
| 82 | 1  | 0 | -6.401592 | 4.698805  | -3.006690 |
| 83 | 1  | 0 | -5.810673 | 5.260475  | -0.670733 |
| 84 | 1  | 0 | -4.677416 | 4.719883  | 1.419436  |
| 85 | 1  | 0 | -3.191522 | 3.214059  | 2.724581  |
| 86 | 1  | 0 | -5.555888 | 0.219706  | 0.293606  |
| 87 | 1  | 0 | -7.417319 | -1.333774 | -0.062992 |
| 88 | 1  | 0 | -7.111624 | -3.379978 | -1.454257 |
| 89 | 1  | 0 | -4.902088 | -3.843942 | -2.466774 |
| 90 | 1  | 0 | -2.595773 | -3.165720 | -2.938450 |
| 91 | 1  | 0 | -0.699584 | -1.618454 | -2.517689 |

92 8 0 -0.670839 0.369109 -0.952771

-----  
*cis*-2a as diene

**cis-endo-TS-Re**

Standard orientation:

| Center Number | Atomic Number | Atomic Type | Coordinates (Angstroms) |           |           |
|---------------|---------------|-------------|-------------------------|-----------|-----------|
|               |               |             | X                       | Y         | Z         |
| 1             | 6             | 0           | -2.637442               | -2.776807 | 0.091995  |
| 2             | 7             | 0           | -4.481495               | -1.293732 | -0.086076 |
| 3             | 6             | 0           | -3.889132               | -2.240205 | 0.580490  |
| 4             | 6             | 0           | -4.504173               | -2.862018 | 1.802925  |
| 5             | 6             | 0           | -1.874022               | -2.135580 | -0.857966 |
| 6             | 6             | 0           | -3.947611               | -0.961436 | -1.424005 |
| 7             | 6             | 0           | -2.416960               | -0.929714 | -1.554770 |
| 8             | 1             | 0           | -3.786377               | -2.914252 | 2.622759  |
| 9             | 1             | 0           | -5.401259               | -2.341247 | 2.126861  |
| 10            | 1             | 0           | -4.804142               | -3.882388 | 1.544204  |
| 11            | 6             | 0           | -0.601790               | -2.774969 | -0.859532 |
| 12            | 6             | 0           | -0.665708               | -3.818615 | 0.092387  |
| 13            | 7             | 0           | -1.910842               | -3.796667 | 0.670856  |
| 14            | 1             | 0           | -2.238180               | -4.434929 | 1.374021  |
| 15            | 1             | 0           | -4.335939               | -1.740901 | -2.085315 |
| 16            | 1             | 0           | -4.386502               | -0.015908 | -1.731424 |
| 17            | 1             | 0           | -2.170925               | -0.945931 | -2.618716 |
| 18            | 1             | 0           | -1.974276               | -0.017256 | -1.146507 |
| 19            | 6             | 0           | 0.610876                | -2.515548 | -1.555576 |
| 20            | 6             | 0           | 1.698993                | -3.344767 | -1.298045 |
| 21            | 6             | 0           | 1.595112                | -4.410947 | -0.361454 |
| 22            | 6             | 0           | 0.432395                | -4.663091 | 0.324729  |
| 23            | 8             | 0           | 2.903113                | -3.219788 | -1.871601 |
| 24            | 6             | 0           | 3.123508                | -2.096982 | -2.731378 |
| 25            | 1             | 0           | 0.650963                | -1.738108 | -2.306500 |
| 26            | 1             | 0           | 2.480640                | -5.010329 | -0.202105 |
| 27            | 1             | 0           | 0.378867                | -5.473289 | 1.040984  |
| 28            | 1             | 0           | 2.538044                | -2.206718 | -3.647492 |
| 29            | 1             | 0           | 4.184536                | -2.110280 | -2.958136 |
| 30            | 1             | 0           | 2.869178                | -1.162989 | -2.226732 |
| 31            | 6             | 0           | -4.077909               | 2.140375  | -0.242497 |
| 32            | 6             | 0           | -5.395223               | 2.306175  | -0.907070 |
| 33            | 6             | 0           | -4.023535               | 1.072632  | 0.740159  |
| 34            | 6             | 0           | -5.107976               | 0.145622  | 0.846265  |
| 35            | 6             | 0           | -6.450517               | 1.450106  | -0.601543 |
| 36            | 8             | 0           | -6.327053               | 0.438184  | 0.326017  |
| 37            | 8             | 0           | -3.126169               | 2.862086  | -0.522422 |
| 38            | 6             | 0           | -2.773635               | 0.726829  | 1.290000  |
| 39            | 6             | 0           | -2.520339               | -0.265469 | 2.201224  |
| 40            | 1             | 0           | -5.241869               | -0.378670 | 1.780463  |
| 41            | 1             | 0           | -1.919550               | 1.247166  | 0.863151  |
| 42            | 6             | 0           | -1.188079               | -0.792750 | 2.274596  |
| 43            | 8             | 0           | -0.316089               | -0.533904 | 1.431415  |
| 44            | 1             | 0           | -3.267443               | -0.687477 | 2.857672  |
| 45            | 8             | 0           | -0.958568               | -1.639318 | 3.273708  |
| 46            | 6             | 0           | 0.375339                | -2.186590 | 3.332672  |
| 47            | 1             | 0           | 1.119502                | -1.395715 | 3.281970  |
| 48            | 1             | 0           | 0.534342                | -2.872710 | 2.500927  |
| 49            | 1             | 0           | 0.423327                | -2.714680 | 4.279549  |
| 50            | 6             | 0           | -5.598369               | 3.315909  | -1.850473 |
| 51            | 6             | 0           | -6.831439               | 3.465536  | -2.464456 |

Imaginary frequency: -302.3691 cm<sup>-1</sup>  
Electronic energy  $E = -4188.787327$  a.u.  
Enthalpy  $H = -4188.740476$  a.u.  
Entropy  $S = 265.359$  cal/mol/K  
Gibbs free energy  $G = -4188.866557$  a.u.  
Total free energy in solution  $E_{\text{sol}} = -4190.37820$  a.u.



|    |    |   |           |           |           |
|----|----|---|-----------|-----------|-----------|
| 52 | 6  | 0 | -7.877314 | 2.597847  | -2.137862 |
| 53 | 6  | 0 | -7.694359 | 1.584351  | -1.207065 |
| 54 | 1  | 0 | -4.761627 | 3.965427  | -2.071816 |
| 55 | 1  | 0 | -6.986041 | 4.250451  | -3.192565 |
| 56 | 1  | 0 | -8.842672 | 2.711519  | -2.614105 |
| 57 | 1  | 0 | -8.488156 | 0.900591  | -0.939075 |
| 58 | 30 | 0 | 1.118037  | -0.935957 | 0.142407  |
| 59 | 6  | 0 | 4.839818  | -1.702415 | 0.243425  |
| 60 | 6  | 0 | 2.707880  | 1.484359  | 0.193862  |
| 61 | 6  | 0 | 1.470990  | 1.438657  | -0.447174 |
| 62 | 6  | 0 | 0.533226  | 2.499450  | -0.268580 |
| 63 | 6  | 0 | 3.774708  | 0.468129  | -0.079723 |
| 64 | 6  | 0 | 3.726538  | -0.829358 | 0.432618  |
| 65 | 6  | 0 | 2.991161  | 2.572613  | 1.081431  |
| 66 | 6  | 0 | 4.906409  | 0.862630  | -0.867228 |
| 67 | 6  | 0 | 5.935270  | -1.320629 | -0.472704 |
| 68 | 6  | 0 | 5.994929  | -0.032481 | -1.065916 |
| 69 | 6  | 0 | 2.038001  | 3.614085  | 1.263601  |
| 70 | 6  | 0 | 0.808545  | 3.550770  | 0.555723  |
| 71 | 1  | 0 | 6.770654  | -1.999236 | -0.607713 |
| 72 | 1  | 0 | 4.764822  | -2.688629 | 0.684073  |
| 73 | 6  | 0 | 7.108219  | 0.369847  | -1.843911 |
| 74 | 6  | 0 | 4.985226  | 2.142594  | -1.482254 |
| 75 | 6  | 0 | 4.209377  | 2.653771  | 1.808523  |
| 76 | 6  | 0 | 2.327363  | 4.686261  | 2.141885  |
| 77 | 1  | 0 | 0.082448  | 4.345336  | 0.686939  |
| 78 | 1  | 0 | -0.409174 | 2.435457  | -0.799501 |
| 79 | 8  | 0 | 1.104679  | 0.389048  | -1.205507 |
| 80 | 8  | 0 | 2.674778  | -1.324568 | 1.099988  |
| 81 | 6  | 0 | 4.461150  | 3.703736  | 2.655966  |
| 82 | 6  | 0 | 3.514227  | 4.738061  | 2.826947  |
| 83 | 6  | 0 | 7.154962  | 1.613164  | -2.419585 |
| 84 | 6  | 0 | 6.073931  | 2.503910  | -2.235138 |
| 85 | 1  | 0 | 7.925733  | -0.331070 | -1.974012 |
| 86 | 1  | 0 | 8.010121  | 1.912529  | -3.012492 |
| 87 | 1  | 0 | 6.103986  | 3.484327  | -2.694561 |
| 88 | 1  | 0 | 4.161786  | 2.831800  | -1.353939 |
| 89 | 1  | 0 | 4.938902  | 1.864097  | 1.688447  |
| 90 | 1  | 0 | 5.396724  | 3.739174  | 3.200662  |
| 91 | 1  | 0 | 3.726240  | 5.562161  | 3.496535  |
| 92 | 1  | 0 | 1.585310  | 5.467971  | 2.261925  |

### cis-endo-TS-Si

Standard orientation:

| Center Number | Atomic Number | Atomic Type | Coordinates (Angstroms) |           |           |
|---------------|---------------|-------------|-------------------------|-----------|-----------|
|               |               |             | X                       | Y         | Z         |
| 1             | 6             | 0           | 2.929227                | -2.416557 | -0.796979 |
| 2             | 7             | 0           | 4.422303                | -0.603776 | -0.474076 |
| 3             | 6             | 0           | 4.092735                | -1.826359 | -0.172054 |
| 4             | 6             | 0           | 4.920521                | -2.654267 | 0.770247  |
| 5             | 6             | 0           | 1.974720                | -1.650115 | -1.431040 |
| 6             | 6             | 0           | 3.766553                | 0.010374  | -1.646681 |
| 7             | 6             | 0           | 2.254454                | -0.223048 | -1.777180 |
| 8             | 1             | 0           | 4.304254                | -3.148341 | 1.522359  |
| 9             | 1             | 0           | 5.693484                | -2.062451 | 1.255005  |
| 10            | 1             | 0           | 5.430354                | -3.423217 | 0.180975  |

Imaginary frequency: -316.1013 cm<sup>-1</sup>

Electronic energy  $E = -4188.785694$  a.u.

Enthalpy  $H = -4188.865454$  a.u.

Entropy  $S = 266.809$  cal/mol/K

Gibbs free energy  $G = -4189.760132$  a.u.

Total free energy in solution  $E_{\text{sol}} = -4190.37767$  a.u.

|    |    |   |           |           |           |
|----|----|---|-----------|-----------|-----------|
| 11 | 6  | 0 | 0.807713  | -2.461802 | -1.540318 |
| 12 | 6  | 0 | 1.136311  | -3.727720 | -1.001078 |
| 13 | 7  | 0 | 2.428516  | -3.676378 | -0.540541 |
| 14 | 1  | 0 | 2.924640  | -4.434504 | -0.106825 |
| 15 | 1  | 0 | 4.268804  | -0.430806 | -2.511686 |
| 16 | 1  | 0 | 3.998123  | 1.072477  | -1.635381 |
| 17 | 1  | 0 | 1.980246  | -0.026859 | -2.817889 |
| 18 | 1  | 0 | 1.650430  | 0.448566  | -1.162955 |
| 19 | 6  | 0 | -0.511496 | -2.200812 | -2.004821 |
| 20 | 6  | 0 | -1.429832 | -3.247370 | -1.974864 |
| 21 | 6  | 0 | -1.061451 | -4.519796 | -1.455386 |
| 22 | 6  | 0 | 0.202157  | -4.774550 | -0.979410 |
| 23 | 8  | 0 | -2.690725 | -3.169267 | -2.412146 |
| 24 | 6  | 0 | -3.194257 | -1.877592 | -2.766060 |
| 25 | 1  | 0 | -0.750719 | -1.248102 | -2.461992 |
| 26 | 1  | 0 | -1.827465 | -5.282698 | -1.445636 |
| 27 | 1  | 0 | 0.456435  | -5.750008 | -0.583671 |
| 28 | 1  | 0 | -2.661965 | -1.480656 | -3.633397 |
| 29 | 1  | 0 | -4.239255 | -2.031096 | -3.016195 |
| 30 | 1  | 0 | -3.110415 | -1.203382 | -1.914518 |
| 31 | 6  | 0 | 3.030982  | 2.413034  | 0.510752  |
| 32 | 6  | 0 | 4.197474  | 3.167806  | -0.018895 |
| 33 | 6  | 0 | 3.351608  | 1.107677  | 1.070725  |
| 34 | 6  | 0 | 4.668107  | 0.567065  | 0.902664  |
| 35 | 6  | 0 | 5.472686  | 2.611760  | 0.015678  |
| 36 | 8  | 0 | 5.709428  | 1.360324  | 0.543544  |
| 37 | 8  | 0 | 1.902055  | 2.880739  | 0.475100  |
| 38 | 6  | 0 | 2.303805  | 0.262648  | 1.491699  |
| 39 | 6  | 0 | 2.491743  | -0.970291 | 2.068393  |
| 40 | 1  | 0 | 5.019715  | -0.165623 | 1.613514  |
| 41 | 1  | 0 | 1.296996  | 0.609758  | 1.259314  |
| 42 | 6  | 0 | 1.457855  | -1.950729 | 2.159048  |
| 43 | 8  | 0 | 0.322440  | -1.915051 | 1.650984  |
| 44 | 1  | 0 | 3.438197  | -1.264019 | 2.498496  |
| 45 | 8  | 0 | 1.825132  | -3.043183 | 2.841714  |
| 46 | 6  | 0 | 0.830582  | -4.073282 | 2.947962  |
| 47 | 1  | 0 | -0.049720 | -3.692429 | 3.460957  |
| 48 | 1  | 0 | 0.541250  | -4.421750 | 1.957455  |
| 49 | 1  | 0 | 1.299727  | -4.866209 | 3.522266  |
| 50 | 6  | 0 | 4.033794  | 4.445570  | -0.557422 |
| 51 | 6  | 0 | 5.125507  | 5.147310  | -1.043862 |
| 52 | 6  | 0 | 6.397230  | 4.570120  | -0.995033 |
| 53 | 6  | 0 | 6.580122  | 3.299172  | -0.466915 |
| 54 | 1  | 0 | 3.031478  | 4.853406  | -0.572523 |
| 55 | 1  | 0 | 4.995791  | 6.138044  | -1.458420 |
| 56 | 1  | 0 | 7.253259  | 5.114841  | -1.372220 |
| 57 | 1  | 0 | 7.554194  | 2.831789  | -0.418140 |
| 58 | 30 | 0 | -0.829194 | -1.284865 | 0.179681  |
| 59 | 8  | 0 | -2.622241 | -1.751483 | 0.479663  |
| 60 | 8  | 0 | -0.468248 | 0.494818  | -0.301237 |
| 61 | 6  | 0 | -1.268520 | 1.489005  | -2.288494 |
| 62 | 6  | 0 | -3.128334 | 0.551787  | 0.922506  |
| 63 | 6  | 0 | -3.073298 | -0.788901 | 1.298698  |
| 64 | 6  | 0 | -3.515571 | -1.173919 | 2.599734  |
| 65 | 6  | 0 | -2.817575 | 0.976433  | -0.477140 |
| 66 | 6  | 0 | -1.515234 | 0.981399  | -0.976605 |
| 67 | 6  | 0 | -3.556263 | 1.530525  | 1.875436  |
| 68 | 6  | 0 | -3.891586 | 1.394604  | -1.328875 |
| 69 | 6  | 0 | -2.284015 | 1.913712  | -3.096211 |
| 70 | 6  | 0 | -3.628666 | 1.861506  | -2.647922 |
| 71 | 6  | 0 | -3.981447 | 1.128476  | 3.172426  |
| 72 | 6  | 0 | -3.958913 | -0.252022 | 3.501754  |

|    |   |   |           |           |           |
|----|---|---|-----------|-----------|-----------|
| 73 | 1 | 0 | -2.076884 | 2.294168  | -4.090609 |
| 74 | 1 | 0 | -0.235488 | 1.529409  | -2.613205 |
| 75 | 6 | 0 | -4.700435 | 2.260614  | -3.484754 |
| 76 | 6 | 0 | -5.250241 | 1.332327  | -0.910717 |
| 77 | 6 | 0 | -3.574742 | 2.919283  | 1.572904  |
| 78 | 6 | 0 | -4.415491 | 2.102144  | 4.104628  |
| 79 | 1 | 0 | -4.295638 | -0.559801 | 4.485716  |
| 80 | 1 | 0 | -3.483371 | -2.231027 | 2.833098  |
| 81 | 6 | 0 | -6.268340 | 1.718956  | -1.745031 |
| 82 | 6 | 0 | -5.997700 | 2.194946  | -3.048116 |
| 83 | 6 | 0 | -4.428389 | 3.433849  | 3.779975  |
| 84 | 6 | 0 | -3.996594 | 3.840889  | 2.497597  |
| 85 | 1 | 0 | -4.737017 | 1.769192  | 5.085463  |
| 86 | 1 | 0 | -4.761085 | 4.171537  | 4.499457  |
| 87 | 1 | 0 | -3.994454 | 4.893643  | 2.242756  |
| 88 | 1 | 0 | -3.236305 | 3.243195  | 0.598059  |
| 89 | 1 | 0 | -5.471309 | 0.964556  | 0.081739  |
| 90 | 1 | 0 | -7.293247 | 1.657259  | -1.400307 |
| 91 | 1 | 0 | -6.811116 | 2.501155  | -3.693743 |
| 92 | 1 | 0 | -4.469542 | 2.618687  | -4.482164 |

**cis-exo-TS1-Re**

Standard orientation:

Center Atomic Atomic Coordinates (Angstroms)  
Number Number Type X Y Z

|    |   |   |           |           |           |
|----|---|---|-----------|-----------|-----------|
| 1  | 6 | 0 | 0.866992  | 3.775733  | 0.409471  |
| 2  | 6 | 0 | 1.753786  | 4.959791  | 0.262786  |
| 3  | 6 | 0 | 1.461703  | 2.660305  | 1.131052  |
| 4  | 6 | 0 | 2.810881  | 2.766302  | 1.604258  |
| 5  | 8 | 0 | 3.429121  | 3.967977  | 1.695805  |
| 6  | 8 | 0 | -0.247120 | 3.753147  | -0.096827 |
| 7  | 6 | 0 | 0.855182  | 1.399725  | 1.056844  |
| 8  | 6 | 0 | 1.427197  | 0.225588  | 1.509766  |
| 9  | 1 | 0 | 3.065123  | 2.184544  | 2.483167  |
| 10 | 1 | 0 | -0.097153 | 1.368582  | 0.530083  |
| 11 | 6 | 0 | 1.048407  | -1.052919 | 1.032887  |
| 12 | 8 | 0 | 0.312011  | -1.304495 | 0.036540  |
| 13 | 1 | 0 | 2.250336  | 0.213680  | 2.210753  |
| 14 | 8 | 0 | 1.649471  | -2.064596 | 1.651778  |
| 15 | 6 | 0 | 1.377699  | -3.384063 | 1.158065  |
| 16 | 1 | 0 | 0.308574  | -3.583621 | 1.175807  |
| 17 | 1 | 0 | 1.754774  | -3.490439 | 0.142279  |
| 18 | 1 | 0 | 1.906204  | -4.052183 | 1.829983  |
| 19 | 6 | 0 | 2.995526  | 4.998096  | 0.891115  |
| 20 | 6 | 0 | 1.357644  | 6.055077  | -0.509477 |
| 21 | 6 | 0 | 2.187192  | 7.156663  | -0.642873 |
| 22 | 6 | 0 | 3.427123  | 7.173420  | 0.002722  |
| 23 | 6 | 0 | 3.839396  | 6.096154  | 0.774217  |
| 24 | 1 | 0 | 4.791742  | 6.087249  | 1.286451  |
| 25 | 1 | 0 | 4.076589  | 8.033669  | -0.096417 |
| 26 | 1 | 0 | 1.876612  | 8.003147  | -1.240527 |
| 27 | 1 | 0 | 0.387103  | 6.004266  | -0.985174 |
| 28 | 6 | 0 | 4.032608  | -0.334514 | -0.561952 |
| 29 | 7 | 0 | 3.936925  | 1.733631  | 0.579338  |
| 30 | 6 | 0 | 3.482075  | 0.988227  | -0.385329 |
| 31 | 6 | 0 | 2.536439  | 1.512129  | -1.422943 |
| 32 | 6 | 0 | 5.258707  | -0.696034 | -0.055481 |
| 33 | 6 | 0 | 4.952182  | 1.162699  | 1.479523  |
| 34 | 6 | 0 | 6.001260  | 0.316264  | 0.758854  |

Imaginary frequency: -243.2936 cm<sup>-1</sup>  
 Electronic energy  $E = -4188.756768$  a.u.  
 Enthalpy  $H = -4188.709973$  a.u.  
 Entropy  $S = 277.472$  cal/mol/K  
 Gibbs free energy  $G = -4188.841809$  a.u.  
 Total free energy in solution  $E_{\text{sol}} = -4190.35895$  a.u.

|    |    |   |           |           |           |
|----|----|---|-----------|-----------|-----------|
| 35 | 1  | 0 | 1.585421  | 0.974549  | -1.399058 |
| 36 | 1  | 0 | 2.997838  | 1.339444  | -2.398206 |
| 37 | 1  | 0 | 2.352479  | 2.574143  | -1.304839 |
| 38 | 6  | 0 | 5.533066  | -2.010135 | -0.533919 |
| 39 | 6  | 0 | 4.415841  | -2.390588 | -1.315915 |
| 40 | 7  | 0 | 3.527825  | -1.339556 | -1.355691 |
| 41 | 1  | 0 | 2.576177  | -1.396217 | -1.681319 |
| 42 | 1  | 0 | 4.447425  | 0.519507  | 2.211138  |
| 43 | 1  | 0 | 5.407820  | 2.000269  | 2.008767  |
| 44 | 1  | 0 | 6.646085  | -0.150760 | 1.504855  |
| 45 | 1  | 0 | 6.633996  | 0.941895  | 0.121204  |
| 46 | 6  | 0 | 6.614459  | -2.898995 | -0.359714 |
| 47 | 6  | 0 | 6.532879  | -4.141850 | -0.955607 |
| 48 | 6  | 0 | 5.397538  | -4.514604 | -1.721143 |
| 49 | 6  | 0 | 4.338293  | -3.658491 | -1.909637 |
| 50 | 8  | 0 | 7.490680  | -5.103510 | -0.875966 |
| 51 | 6  | 0 | 8.646877  | -4.802022 | -0.118319 |
| 52 | 1  | 0 | 9.279888  | -5.683341 | -0.171635 |
| 53 | 1  | 0 | 8.389926  | -4.597117 | 0.924342  |
| 54 | 1  | 0 | 9.177595  | -3.943630 | -0.538856 |
| 55 | 1  | 0 | 7.470256  | -2.600828 | 0.228537  |
| 56 | 1  | 0 | 5.399612  | -5.503481 | -2.159234 |
| 57 | 1  | 0 | 3.483611  | -3.953114 | -2.505111 |
| 58 | 6  | 0 | -4.527435 | -4.126829 | 0.761966  |
| 59 | 6  | 0 | -5.339554 | -3.172857 | 1.428651  |
| 60 | 6  | 0 | -5.232405 | -1.802817 | 1.060032  |
| 61 | 6  | 0 | -3.632407 | -3.731060 | -0.187832 |
| 62 | 6  | 0 | -3.496553 | -2.358733 | -0.554947 |
| 63 | 6  | 0 | -4.325549 | -1.398354 | 0.024464  |
| 64 | 8  | 0 | -2.537384 | -2.051527 | -1.455691 |
| 65 | 8  | 0 | -2.195065 | 0.586063  | 0.434926  |
| 66 | 6  | 0 | -4.362946 | 0.024291  | -0.447601 |
| 67 | 6  | 0 | -5.520712 | 0.476289  | -1.162449 |
| 68 | 6  | 0 | -5.649513 | 1.847235  | -1.520873 |
| 69 | 6  | 0 | -4.608771 | 2.747744  | -1.173092 |
| 70 | 6  | 0 | -3.348323 | 0.934714  | -0.168647 |
| 71 | 6  | 0 | -3.492641 | 2.306809  | -0.525882 |
| 72 | 1  | 0 | -4.624371 | -5.173897 | 1.027457  |
| 73 | 1  | 0 | -2.993919 | -4.438489 | -0.702555 |
| 74 | 6  | 0 | -6.244541 | -3.561622 | 2.446571  |
| 75 | 6  | 0 | -6.046390 | -0.865774 | 1.753250  |
| 76 | 6  | 0 | -6.568844 | -0.406134 | -1.539975 |
| 77 | 6  | 0 | -6.799367 | 2.288316  | -2.219724 |
| 78 | 1  | 0 | -4.710663 | 3.793054  | -1.443347 |
| 79 | 1  | 0 | -2.672584 | 2.966930  | -0.272919 |
| 80 | 6  | 0 | -7.018943 | -2.633703 | 3.093071  |
| 81 | 6  | 0 | -6.909397 | -1.270047 | 2.740893  |
| 82 | 1  | 0 | -6.309724 | -4.613025 | 2.704379  |
| 83 | 1  | 0 | -7.708287 | -2.938751 | 3.870219  |
| 84 | 1  | 0 | -7.513784 | -0.533875 | 3.256364  |
| 85 | 1  | 0 | -5.967889 | 0.181168  | 1.494353  |
| 86 | 6  | 0 | -7.671448 | 0.048870  | -2.219319 |
| 87 | 6  | 0 | -7.797059 | 1.412976  | -2.563405 |
| 88 | 1  | 0 | -6.482488 | -1.454859 | -1.290945 |
| 89 | 1  | 0 | -8.452771 | -0.647842 | -2.497457 |
| 90 | 1  | 0 | -8.672512 | 1.759241  | -3.098382 |
| 91 | 1  | 0 | -6.871322 | 3.338602  | -2.480241 |
| 92 | 30 | 0 | -1.533453 | -0.909303 | -0.402013 |

---

**cis-exo-IM1-Re**

Standard orientation:

| Center<br>Number | Atomic<br>Number | Atomic<br>Type | Coordinates (Angstroms) |           |           |
|------------------|------------------|----------------|-------------------------|-----------|-----------|
|                  |                  |                | X                       | Y         | Z         |
| 1                | 6                | 0              | 1.031270                | 3.887916  | 0.513750  |
| 2                | 6                | 0              | 2.051507                | 4.928006  | 0.213356  |
| 3                | 6                | 0              | 1.551809                | 2.689219  | 1.161747  |
| 4                | 6                | 0              | 2.981820                | 2.631310  | 1.574459  |
| 5                | 8                | 0              | 3.691354                | 3.833005  | 1.615191  |
| 6                | 8                | 0              | -0.130019               | 4.020012  | 0.153781  |
| 7                | 6                | 0              | 0.822464                | 1.527335  | 1.097030  |
| 8                | 6                | 0              | 1.295999                | 0.266194  | 1.521998  |
| 9                | 1                | 0              | 3.062204                | 2.222564  | 2.583659  |
| 10               | 1                | 0              | -0.152129               | 1.595758  | 0.615042  |
| 11               | 6                | 0              | 0.925065                | -0.931790 | 0.913638  |
| 12               | 8                | 0              | 0.323958                | -1.057187 | -0.212099 |
| 13               | 1                | 0              | 2.004210                | 0.173988  | 2.335484  |
| 14               | 8                | 0              | 1.368265                | -2.044029 | 1.512719  |
| 15               | 6                | 0              | 1.010638                | -3.292840 | 0.911196  |
| 16               | 1                | 0              | -0.069925               | -3.373169 | 0.801193  |
| 17               | 1                | 0              | 1.484753                | -3.402813 | -0.063424 |
| 18               | 1                | 0              | 1.380183                | -4.052089 | 1.593173  |
| 19               | 6                | 0              | 3.338024                | 4.834684  | 0.742342  |
| 20               | 6                | 0              | 1.736543                | 6.006575  | -0.616235 |
| 21               | 6                | 0              | 2.688152                | 6.970884  | -0.908519 |
| 22               | 6                | 0              | 3.969421                | 6.862587  | -0.362660 |
| 23               | 6                | 0              | 4.301555                | 5.797792  | 0.465041  |
| 24               | 1                | 0              | 5.284856                | 5.700073  | 0.904858  |
| 25               | 1                | 0              | 4.716171                | 7.614828  | -0.583075 |
| 26               | 1                | 0              | 2.440468                | 7.805020  | -1.551153 |
| 27               | 1                | 0              | 0.728925                | 6.055480  | -1.007967 |
| 28               | 6                | 0              | 3.875431                | -0.411635 | -0.431885 |
| 29               | 7                | 0              | 3.817878                | 1.595392  | 0.795081  |
| 30               | 6                | 0              | 3.348482                | 0.902436  | -0.224477 |
| 31               | 6                | 0              | 2.483458                | 1.478738  | -1.303705 |
| 32               | 6                | 0              | 5.080659                | -0.837467 | 0.080606  |
| 33               | 6                | 0              | 4.813800                | 0.963314  | 1.686136  |
| 34               | 6                | 0              | 5.842274                | 0.116273  | 0.943006  |
| 35               | 1                | 0              | 1.496274                | 1.011679  | -1.295801 |
| 36               | 1                | 0              | 2.968473                | 1.231962  | -2.250929 |
| 37               | 1                | 0              | 2.379614                | 2.554797  | -1.230595 |
| 38               | 6                | 0              | 5.315857                | -2.137208 | -0.447894 |
| 39               | 6                | 0              | 4.195611                | -2.444150 | -1.258820 |
| 40               | 7                | 0              | 3.349795                | -1.359669 | -1.282347 |
| 41               | 1                | 0              | 2.371618                | -1.396750 | -1.537232 |
| 42               | 1                | 0              | 4.271368                | 0.322888  | 2.391297  |
| 43               | 1                | 0              | 5.287171                | 1.777609  | 2.233456  |
| 44               | 1                | 0              | 6.457930                | -0.401504 | 1.679955  |
| 45               | 1                | 0              | 6.506206                | 0.745942  | 0.342594  |
| 46               | 6                | 0              | 6.363963                | -3.070080 | -0.293814 |
| 47               | 6                | 0              | 6.242169                | -4.286429 | -0.933757 |
| 48               | 6                | 0              | 5.101050                | -4.588335 | -1.724408 |
| 49               | 6                | 0              | 4.077264                | -3.688466 | -1.896195 |
| 50               | 8                | 0              | 7.159858                | -5.285874 | -0.879362 |
| 51               | 6                | 0              | 8.316402                | -5.058227 | -0.096025 |
| 52               | 1                | 0              | 8.913852                | -5.962205 | -0.172014 |
| 53               | 1                | 0              | 8.051186                | -4.880157 | 0.949461  |

Imaginary frequency: none

Electronic energy  $E = -4188.758990$  a.u.Enthalpy  $H = -4188.712473$  a.u.Entropy  $S = 269.412$  cal/mol/KGibbs free energy  $G = -4188.840479$  a.u.Total free energy in solution  $E_{\text{sol}} = -4190.36340$  a.u.

|    |    |   |           |           |           |
|----|----|---|-----------|-----------|-----------|
| 54 | 1  | 0 | 8.887066  | -4.207945 | -0.478991 |
| 55 | 1  | 0 | 7.222209  | -2.825468 | 0.314931  |
| 56 | 1  | 0 | 5.071668  | -5.561361 | -2.195895 |
| 57 | 1  | 0 | 3.219785  | -3.929155 | -2.511126 |
| 58 | 6  | 0 | -4.203321 | -4.104399 | 0.378223  |
| 59 | 6  | 0 | -5.016590 | -3.284327 | 1.203565  |
| 60 | 6  | 0 | -5.025835 | -1.879508 | 0.978463  |
| 61 | 6  | 0 | -3.418383 | -3.550028 | -0.589659 |
| 62 | 6  | 0 | -3.400449 | -2.140443 | -0.817392 |
| 63 | 6  | 0 | -4.235780 | -1.305852 | -0.072470 |
| 64 | 8  | 0 | -2.541268 | -1.673102 | -1.747098 |
| 65 | 8  | 0 | -2.194017 | 0.746706  | 0.407951  |
| 66 | 6  | 0 | -4.388489 | 0.154407  | -0.376666 |
| 67 | 6  | 0 | -5.619669 | 0.611430  | -0.950889 |
| 68 | 6  | 0 | -5.847064 | 2.002982  | -1.141655 |
| 69 | 6  | 0 | -4.830176 | 2.921599  | -0.770669 |
| 70 | 6  | 0 | -3.403565 | 1.088361  | -0.069665 |
| 71 | 6  | 0 | -3.646343 | 2.479961  | -0.258854 |
| 72 | 1  | 0 | -4.211515 | -5.177416 | 0.535943  |
| 73 | 1  | 0 | -2.783429 | -4.153973 | -1.226384 |
| 74 | 6  | 0 | -5.807203 | -3.839211 | 2.239277  |
| 75 | 6  | 0 | -5.834408 | -1.079099 | 1.830817  |
| 76 | 6  | 0 | -6.645887 | -0.286826 | -1.350358 |
| 77 | 6  | 0 | -7.070600 | 2.446630  | -1.699796 |
| 78 | 1  | 0 | -5.007229 | 3.982120  | -0.912095 |
| 79 | 1  | 0 | -2.843507 | 3.155783  | 0.010333  |
| 80 | 6  | 0 | -6.580474 | -3.040397 | 3.040690  |
| 81 | 6  | 0 | -6.585363 | -1.643190 | 2.831181  |
| 82 | 1  | 0 | -5.784567 | -4.913565 | 2.386016  |
| 83 | 1  | 0 | -7.181313 | -3.472429 | 3.831058  |
| 84 | 1  | 0 | -7.188046 | -1.008508 | 3.469142  |
| 85 | 1  | 0 | -5.841002 | -0.007883 | 1.683776  |
| 86 | 6  | 0 | -7.820365 | 0.171212  | -1.892501 |
| 87 | 6  | 0 | -8.044794 | 1.554614  | -2.067760 |
| 88 | 1  | 0 | -6.483313 | -1.349266 | -1.229801 |
| 89 | 1  | 0 | -8.582926 | -0.537243 | -2.192367 |
| 90 | 1  | 0 | -8.976934 | 1.903604  | -2.494226 |
| 91 | 1  | 0 | -7.219031 | 3.512872  | -1.832158 |
| 92 | 30 | 0 | -1.516523 | -0.636256 | -0.597090 |

### cis-exo-TS2-Re

Standard orientation:

| Center Number | Atomic Number | Atomic Type | Coordinates (Angstroms) |           |           |
|---------------|---------------|-------------|-------------------------|-----------|-----------|
|               |               |             | X                       | Y         | Z         |
| 1             | 6             | 0           | 1.136905                | 4.073563  | 0.367463  |
| 2             | 6             | 0           | 2.242034                | 5.047379  | 0.177521  |
| 3             | 6             | 0           | 1.541427                | 2.799502  | 0.967081  |
| 4             | 6             | 0           | 2.925208                | 2.627230  | 1.498311  |
| 5             | 8             | 0           | 3.709675                | 3.779800  | 1.624845  |
| 6             | 8             | 0           | 0.006799                | 4.301744  | -0.034349 |
| 7             | 6             | 0           | 0.757737                | 1.696043  | 0.775066  |
| 8             | 6             | 0           | 1.187950                | 0.389730  | 1.128515  |
| 9             | 1             | 0           | 2.869556                | 2.216346  | 2.509431  |
| 10            | 1             | 0           | -0.186222               | 1.839857  | 0.252709  |
| 11            | 6             | 0           | 0.741951                | -0.782270 | 0.500718  |
| 12            | 8             | 0           | 0.192641                | -0.852461 | -0.649727 |
| 13            | 1             | 0           | 1.798283                | 0.227056  | 2.007998  |
| 14            | 8             | 0           | 1.071722                | -1.915467 | 1.118206  |
| 15            | 6             | 0           | 0.654901                | -3.142994 | 0.503004  |

Imaginary frequency: -139.2525 cm<sup>-1</sup>

Electronic energy  $E = -4188.758832$  a.u.

Enthalpy  $H = -4188.712144$  a.u.

Entropy  $S = 274.334$  cal/mol/K

Gibbs free energy  $G = -4188.842489$  a.u.

Total free energy in solution  $E_{\text{sol}} = -4190.35903$  a.u.

|    |   |   |           |           |           |
|----|---|---|-----------|-----------|-----------|
| 16 | 1 | 0 | -0.424655 | -3.152716 | 0.358242  |
| 17 | 1 | 0 | 1.157081  | -3.280799 | -0.453623 |
| 18 | 1 | 0 | 0.954613  | -3.920932 | 1.197578  |
| 19 | 6 | 0 | 3.483108  | 4.835033  | 0.777220  |
| 20 | 6 | 0 | 2.054815  | 6.181712  | -0.615617 |
| 21 | 6 | 0 | 3.088359  | 7.084759  | -0.806758 |
| 22 | 6 | 0 | 4.323125  | 6.857039  | -0.193920 |
| 23 | 6 | 0 | 4.527515  | 5.736571  | 0.600116  |
| 24 | 1 | 0 | 5.472979  | 5.547505  | 1.089988  |
| 25 | 1 | 0 | 5.134038  | 7.560051  | -0.336082 |
| 26 | 1 | 0 | 2.940474  | 7.961968  | -1.422238 |
| 27 | 1 | 0 | 1.079245  | 6.321994  | -1.062713 |
| 28 | 6 | 0 | 3.737799  | -0.512502 | -0.368240 |
| 29 | 7 | 0 | 3.753846  | 1.551850  | 0.791991  |
| 30 | 6 | 0 | 3.239905  | 0.825841  | -0.203221 |
| 31 | 6 | 0 | 2.602657  | 1.460623  | -1.408520 |
| 32 | 6 | 0 | 4.890124  | -0.981349 | 0.218504  |
| 33 | 6 | 0 | 4.626128  | 0.871062  | 1.771094  |
| 34 | 6 | 0 | 5.643915  | -0.062485 | 1.124037  |
| 35 | 1 | 0 | 1.656149  | 0.975826  | -1.651289 |
| 36 | 1 | 0 | 3.297340  | 1.292807  | -2.236042 |
| 37 | 1 | 0 | 2.452613  | 2.527252  | -1.297459 |
| 38 | 6 | 0 | 5.115621  | -2.288013 | -0.303864 |
| 39 | 6 | 0 | 4.049080  | -2.550489 | -1.196472 |
| 40 | 7 | 0 | 3.241332  | -1.438280 | -1.257941 |
| 41 | 1 | 0 | 2.309357  | -1.409797 | -1.646011 |
| 42 | 1 | 0 | 3.994592  | 0.283066  | 2.448777  |
| 43 | 1 | 0 | 5.115082  | 1.661194  | 2.339773  |
| 44 | 1 | 0 | 6.163653  | -0.604914 | 1.915548  |
| 45 | 1 | 0 | 6.394475  | 0.507596  | 0.567696  |
| 46 | 6 | 0 | 6.117911  | -3.256762 | -0.087583 |
| 47 | 6 | 0 | 6.006033  | -4.461755 | -0.752527 |
| 48 | 6 | 0 | 4.920600  | -4.716464 | -1.629856 |
| 49 | 6 | 0 | 3.941512  | -3.779739 | -1.862257 |
| 50 | 8 | 0 | 6.886937  | -5.491386 | -0.641899 |
| 51 | 6 | 0 | 7.996389  | -5.300818 | 0.214864  |
| 52 | 1 | 0 | 8.574558  | -6.219269 | 0.167490  |
| 53 | 1 | 0 | 7.671250  | -5.125108 | 1.243868  |
| 54 | 1 | 0 | 8.611691  | -4.462177 | -0.121962 |
| 55 | 1 | 0 | 6.936092  | -3.048235 | 0.586274  |
| 56 | 1 | 0 | 4.895106  | -5.681453 | -2.117698 |
| 57 | 1 | 0 | 3.125432  | -3.984462 | -2.543273 |
| 58 | 6 | 0 | -3.636369 | -4.007420 | 0.351507  |
| 59 | 6 | 0 | -4.319485 | -3.239127 | 1.331335  |
| 60 | 6 | 0 | -4.519001 | -1.850334 | 1.097735  |
| 61 | 6 | 0 | -3.143727 | -3.415966 | -0.774715 |
| 62 | 6 | 0 | -3.311244 | -2.016359 | -1.015735 |
| 63 | 6 | 0 | -4.039249 | -1.237948 | -0.109622 |
| 64 | 8 | 0 | -2.708934 | -1.491532 | -2.100472 |
| 65 | 8 | 0 | -2.227221 | 1.089688  | -0.120499 |
| 66 | 6 | 0 | -4.436956 | 0.180595  | -0.398178 |
| 67 | 6 | 0 | -5.813928 | 0.450009  | -0.693602 |
| 68 | 6 | 0 | -6.266311 | 1.791412  | -0.833797 |
| 69 | 6 | 0 | -5.330831 | 2.849930  | -0.687896 |
| 70 | 6 | 0 | -3.545772 | 1.247515  | -0.317829 |
| 71 | 6 | 0 | -4.015894 | 2.586568  | -0.445430 |
| 72 | 1 | 0 | -3.508679 | -5.071743 | 0.517351  |
| 73 | 1 | 0 | -2.611950 | -3.978606 | -1.532399 |
| 74 | 6 | 0 | -4.802594 | -3.832217 | 2.523031  |
| 75 | 6 | 0 | -5.197242 | -1.102504 | 2.097568  |
| 76 | 6 | 0 | -6.768281 | -0.589562 | -0.861945 |
| 77 | 6 | 0 | -7.629472 | 2.049653  | -1.116834 |

|    |    |   |           |           |           |
|----|----|---|-----------|-----------|-----------|
| 78 | 1  | 0 | -5.679260 | 3.872279  | -0.783815 |
| 79 | 1  | 0 | -3.276406 | 3.371592  | -0.346000 |
| 80 | 6  | 0 | -5.457706 | -3.083676 | 3.466535  |
| 81 | 6  | 0 | -5.649726 | -1.701851 | 3.246307  |
| 82 | 1  | 0 | -4.641861 | -4.894200 | 2.673152  |
| 83 | 1  | 0 | -5.824524 | -3.544072 | 4.375168  |
| 84 | 1  | 0 | -6.159726 | -1.106735 | 3.993646  |
| 85 | 1  | 0 | -5.345608 | -0.042871 | 1.941702  |
| 86 | 6  | 0 | -8.082655 | -0.310132 | -1.140143 |
| 87 | 6  | 0 | -8.527430 | 1.024303  | -1.265794 |
| 88 | 1  | 0 | -6.440251 | -1.616861 | -0.779899 |
| 89 | 1  | 0 | -8.786014 | -1.123641 | -1.269174 |
| 90 | 1  | 0 | -9.567539 | 1.231864  | -1.483550 |
| 91 | 1  | 0 | -7.947429 | 3.081684  | -1.216632 |
| 92 | 30 | 0 | -1.632525 | -0.367647 | -1.069227 |

**cis-exo-TS1-Si**

Standard orientation:

| Center Number | Atomic Number | Atomic Type | Coordinates (Angstroms) |           |           |
|---------------|---------------|-------------|-------------------------|-----------|-----------|
|               |               |             | X                       | Y         | Z         |
| 1             | 6             | 0           | 6.218151                | -3.407438 | -0.293623 |
| 2             | 6             | 0           | 6.822439                | -2.141780 | -0.510478 |
| 3             | 6             | 0           | 6.003279                | -0.978952 | -0.493098 |
| 4             | 6             | 0           | 4.873104                | -3.509513 | -0.099159 |
| 5             | 6             | 0           | 4.036128                | -2.356556 | -0.089776 |
| 6             | 6             | 0           | 4.594933                | -1.089715 | -0.247102 |
| 7             | 8             | 0           | 2.718294                | -2.570579 | 0.074749  |
| 8             | 8             | 0           | 2.558583                | -0.109142 | -2.120619 |
| 9             | 6             | 0           | 3.808670                | 0.182145  | -0.091881 |
| 10            | 6             | 0           | 4.045405                | 0.997248  | 1.068871  |
| 11            | 6             | 0           | 3.463311                | 2.291162  | 1.167820  |
| 12            | 6             | 0           | 2.648007                | 2.763131  | 0.102628  |
| 13            | 6             | 0           | 2.958184                | 0.667238  | -1.097161 |
| 14            | 6             | 0           | 2.403446                | 1.981394  | -0.986264 |
| 15            | 1             | 0           | 6.843201                | -4.293523 | -0.297412 |
| 16            | 1             | 0           | 4.389851                | -4.466349 | 0.051191  |
| 17            | 6             | 0           | 8.213916                | -2.022907 | -0.744465 |
| 18            | 6             | 0           | 6.631653                | 0.273289  | -0.732435 |
| 19            | 6             | 0           | 4.846133                | 0.545984  | 2.150871  |
| 20            | 6             | 0           | 3.697448                | 3.083486  | 2.316669  |
| 21            | 1             | 0           | 2.190148                | 3.743031  | 0.174198  |
| 22            | 1             | 0           | 1.756700                | 2.320113  | -1.785605 |
| 23            | 6             | 0           | 8.791111                | -0.799088 | -0.962844 |
| 24            | 6             | 0           | 7.982253                | 0.358956  | -0.960188 |
| 25            | 1             | 0           | 8.813753                | -2.926425 | -0.750197 |
| 26            | 1             | 0           | 9.855583                | -0.717285 | -1.142930 |
| 27            | 1             | 0           | 8.431982                | 1.326719  | -1.145223 |
| 28            | 1             | 0           | 6.024644                | 1.168246  | -0.745847 |
| 29            | 6             | 0           | 5.054045                | 1.335027  | 3.255470  |
| 30            | 6             | 0           | 4.479036                | 2.621075  | 3.344960  |
| 31            | 1             | 0           | 5.288241                | -0.439337 | 2.094569  |
| 32            | 1             | 0           | 5.666913                | 0.964822  | 4.068078  |
| 33            | 1             | 0           | 4.654582                | 3.233950  | 4.220154  |
| 34            | 1             | 0           | 3.243488                | 4.067013  | 2.364761  |

Imaginary frequency: -190.7999 cm<sup>-1</sup>  
 Electronic energy  $E = -4188.759554$  a.u.  
 Enthalpy  $H = -4188.712405$  a.u.  
 Entropy  $S = 275.948$  cal/mol/K  
 Gibbs free energy  $G = -4188.843517$  a.u.  
 Total free energy in solution  $E_{\text{sol}} = -4190.35657$  a.u.



|    |    |   |           |           |           |
|----|----|---|-----------|-----------|-----------|
| 35 | 6  | 0 | -1.410420 | 3.871563  | -0.361385 |
| 36 | 6  | 0 | -2.502490 | 4.849582  | -0.596108 |
| 37 | 6  | 0 | -1.756513 | 2.785605  | 0.539334  |
| 38 | 6  | 0 | -3.065815 | 2.734266  | 1.118860  |
| 39 | 8  | 0 | -3.880837 | 3.815926  | 1.099193  |
| 40 | 8  | 0 | -0.331038 | 3.974954  | -0.934186 |
| 41 | 6  | 0 | -0.953877 | 1.635222  | 0.546676  |
| 42 | 6  | 0 | -1.230004 | 0.450522  | 1.195885  |
| 43 | 1  | 0 | -3.154025 | 2.254104  | 2.086878  |
| 44 | 1  | 0 | -0.091521 | 1.667891  | -0.113667 |
| 45 | 6  | 0 | -0.622503 | -0.762136 | 0.772607  |
| 46 | 8  | 0 | -0.044682 | -0.900630 | -0.344847 |
| 47 | 1  | 0 | -1.927582 | 0.368033  | 2.017491  |
| 48 | 8  | 0 | -0.804686 | -1.792761 | 1.578745  |
| 49 | 6  | 0 | -0.302671 | -3.076766 | 1.158272  |
| 50 | 1  | 0 | 0.783965  | -3.057949 | 1.084445  |
| 51 | 1  | 0 | -0.750430 | -3.352884 | 0.203632  |
| 52 | 1  | 0 | -0.623647 | -3.766342 | 1.931858  |
| 53 | 6  | 0 | -3.692125 | 4.768971  | 0.123351  |
| 54 | 6  | 0 | -2.356427 | 5.866840  | -1.542991 |
| 55 | 6  | 0 | -3.378851 | 6.776111  | -1.758818 |
| 56 | 6  | 0 | -4.561974 | 6.677756  | -1.020497 |
| 57 | 6  | 0 | -4.726622 | 5.676101  | -0.074223 |
| 58 | 1  | 0 | -5.630658 | 5.582991  | 0.511894  |
| 59 | 1  | 0 | -5.361659 | 7.388391  | -1.184937 |
| 60 | 1  | 0 | -3.262739 | 7.561948  | -2.493099 |
| 61 | 1  | 0 | -1.421621 | 5.912024  | -2.086112 |
| 62 | 30 | 0 | 1.794701  | -1.266574 | -0.846912 |
| 63 | 6  | 0 | -3.789918 | -0.816671 | -0.500523 |
| 64 | 7  | 0 | -4.051483 | 1.373378  | 0.349737  |
| 65 | 6  | 0 | -3.526728 | 0.601583  | -0.557314 |
| 66 | 6  | 0 | -2.791462 | 1.146221  | -1.743753 |
| 67 | 6  | 0 | -4.856534 | -1.343912 | 0.187417  |
| 68 | 6  | 0 | -4.845423 | 0.747518  | 1.420388  |
| 69 | 6  | 0 | -5.738113 | -0.395038 | 0.936438  |
| 70 | 1  | 0 | -1.738300 | 0.854207  | -1.725528 |
| 71 | 1  | 0 | -3.246189 | 0.710805  | -2.636683 |
| 72 | 1  | 0 | -2.868161 | 2.227028  | -1.802711 |
| 73 | 6  | 0 | -4.858701 | -2.746528 | -0.065553 |
| 74 | 6  | 0 | -3.749140 | -3.001193 | -0.906886 |
| 75 | 7  | 0 | -3.132790 | -1.804980 | -1.197910 |
| 76 | 1  | 0 | -2.212151 | -1.705615 | -1.597313 |
| 77 | 1  | 0 | -4.157436 | 0.337770  | 2.170125  |
| 78 | 1  | 0 | -5.429248 | 1.544168  | 1.883088  |
| 79 | 1  | 0 | -6.202913 | -0.866109 | 1.803838  |
| 80 | 1  | 0 | -6.541526 | -0.016913 | 0.295968  |
| 81 | 6  | 0 | -5.687311 | -3.806037 | 0.358815  |
| 82 | 6  | 0 | -5.366701 | -5.083835 | -0.054953 |
| 83 | 6  | 0 | -4.241406 | -5.324809 | -0.884364 |
| 84 | 6  | 0 | -3.428384 | -4.303403 | -1.316177 |
| 85 | 8  | 0 | -6.065618 | -6.202433 | 0.276324  |
| 86 | 6  | 0 | -7.201216 | -6.030996 | 1.102005  |
| 87 | 1  | 0 | -7.619186 | -7.022761 | 1.249590  |
| 88 | 1  | 0 | -6.921975 | -5.603421 | 2.068844  |
| 89 | 1  | 0 | -7.942908 | -5.388588 | 0.619582  |
| 90 | 1  | 0 | -6.538166 | -3.606303 | 0.993896  |
| 91 | 1  | 0 | -4.048581 | -6.349819 | -1.170974 |
| 92 | 1  | 0 | -2.579604 | -4.502212 | -1.958064 |

**cis-exo-IM1-Si**

Standard orientation:

Imaginary frequency: -190.7999 cm<sup>-1</sup>

Electronic energy  $E = -4188.762100$  a.u.

| Center Number | Atomic Number | Atomic Type | Coordinates (Angstroms) |           |           |
|---------------|---------------|-------------|-------------------------|-----------|-----------|
|               |               |             | X                       | Y         | Z         |
| 1             | 6             | 0           | 6.152328                | -3.479065 | -0.401886 |
| 2             | 6             | 0           | 6.792212                | -2.226907 | -0.592837 |
| 3             | 6             | 0           | 6.008540                | -1.040936 | -0.536402 |
| 4             | 6             | 0           | 4.807075                | -3.545235 | -0.194223 |
| 5             | 6             | 0           | 4.004547                | -2.368518 | -0.145364 |
| 6             | 6             | 0           | 4.600221                | -1.115513 | -0.276900 |
| 7             | 8             | 0           | 2.685125                | -2.548111 | 0.031281  |
| 8             | 8             | 0           | 2.559575                | -0.047105 | -2.095290 |
| 9             | 6             | 0           | 3.852156                | 0.172909  | -0.083500 |
| 10            | 6             | 0           | 4.127978                | 0.958571  | 1.088678  |
| 11            | 6             | 0           | 3.577502                | 2.263047  | 1.224259  |
| 12            | 6             | 0           | 2.755278                | 2.775523  | 0.183927  |
| 13            | 6             | 0           | 2.994317                | 0.696451  | -1.062409 |
| 14            | 6             | 0           | 2.473895                | 2.021148  | -0.915395 |
| 15            | 1             | 0           | 6.750233                | -4.383158 | -0.435607 |
| 16            | 1             | 0           | 4.296712                | -4.490693 | -0.062312 |
| 17            | 6             | 0           | 8.184182                | -2.143785 | -0.838925 |
| 18            | 6             | 0           | 6.672503                | 0.197470  | -0.751437 |
| 19            | 6             | 0           | 4.935755                | 0.466709  | 2.147631  |
| 20            | 6             | 0           | 3.848696                | 3.025336  | 2.385536  |
| 21            | 1             | 0           | 2.319765                | 3.762991  | 0.284005  |
| 22            | 1             | 0           | 1.821758                | 2.390713  | -1.696698 |
| 23            | 6             | 0           | 8.796258                | -0.932735 | -1.032181 |
| 24            | 6             | 0           | 8.022775                | 0.248457  | -0.991536 |
| 25            | 1             | 0           | 8.756137                | -3.064592 | -0.874337 |
| 26            | 1             | 0           | 9.860943                | -0.878499 | -1.221398 |
| 27            | 1             | 0           | 8.499478                | 1.206807  | -1.156991 |
| 28            | 1             | 0           | 6.092710                | 1.110207  | -0.735794 |
| 29            | 6             | 0           | 5.179861                | 1.227053  | 3.264684  |
| 30            | 6             | 0           | 4.636110                | 2.523767  | 3.390683  |
| 31            | 1             | 0           | 5.353487                | -0.527268 | 2.063979  |
| 32            | 1             | 0           | 5.796799                | 0.825491  | 4.059145  |
| 33            | 1             | 0           | 4.839527                | 3.113503  | 4.275662  |
| 34            | 1             | 0           | 3.417820                | 4.017413  | 2.461902  |
| 35            | 6             | 0           | -1.357470               | 3.889846  | -0.271009 |
| 36            | 6             | 0           | -2.495155               | 4.779399  | -0.625789 |
| 37            | 6             | 0           | -1.703398               | 2.765960  | 0.582548  |
| 38            | 6             | 0           | -3.088591               | 2.626641  | 1.104686  |
| 39            | 8             | 0           | -3.925660               | 3.740120  | 1.027180  |
| 40            | 8             | 0           | -0.240749               | 4.075105  | -0.742188 |
| 41            | 6             | 0           | -0.864032               | 1.674343  | 0.626045  |
| 42            | 6             | 0           | -1.145672               | 0.455271  | 1.263580  |
| 43            | 1             | 0           | -3.068558               | 2.359504  | 2.163064  |
| 44            | 1             | 0           | 0.038626                | 1.745282  | 0.024108  |
| 45            | 6             | 0           | -0.614034               | -0.751779 | 0.792224  |
| 46            | 8             | 0           | -0.081525               | -0.890998 | -0.362113 |
| 47            | 1             | 0           | -1.795919               | 0.389226  | 2.125679  |
| 48            | 8             | 0           | -0.816169               | -1.815365 | 1.566546  |
| 49            | 6             | 0           | -0.353523               | -3.091076 | 1.093133  |
| 50            | 1             | 0           | 0.731247                | -3.096444 | 0.992532  |
| 51            | 1             | 0           | -0.825898               | -3.334683 | 0.140802  |
| 52            | 1             | 0           | -0.668979               | -3.800324 | 1.851866  |
| 53            | 6             | 0           | -3.728633               | 4.643175  | 0.009909  |
| 54            | 6             | 0           | -2.344709               | 5.760187  | -1.608953 |
| 55            | 6             | 0           | -3.403918               | 6.587983  | -1.946088 |
| 56            | 6             | 0           | -4.628948               | 6.440413  | -1.291334 |
| 57            | 6             | 0           | -4.798639               | 5.470833  | -0.311613 |
| 58            | 1             | 0           | -5.736337               | 5.345580  | 0.212531  |

Enthalpy  $H = -4188.714829$  a.u.

Entropy  $S = 275.405$  cal/mol/K

Gibbs free energy  $G = -4188.845682$  a.u.

Total free energy in solution  $E_{sol} = -4190.36292$  a.u.

|    |    |   |           |           |           |
|----|----|---|-----------|-----------|-----------|
| 59 | 1  | 0 | -5.459234 | 7.086773  | -1.545857 |
| 60 | 1  | 0 | -3.282724 | 7.346607  | -2.707596 |
| 61 | 1  | 0 | -1.375135 | 5.845790  | -2.081998 |
| 62 | 30 | 0 | 1.762093  | -1.209111 | -0.843418 |
| 63 | 6  | 0 | -3.738663 | -0.753954 | -0.394618 |
| 64 | 7  | 0 | -3.846755 | 1.402929  | 0.536198  |
| 65 | 6  | 0 | -3.365932 | 0.627684  | -0.416085 |
| 66 | 6  | 0 | -2.633227 | 1.129413  | -1.622792 |
| 67 | 6  | 0 | -4.840654 | -1.236940 | 0.275373  |
| 68 | 6  | 0 | -4.706991 | 0.804679  | 1.579346  |
| 69 | 6  | 0 | -5.664085 | -0.257048 | 1.046637  |
| 70 | 1  | 0 | -1.588877 | 0.807780  | -1.605196 |
| 71 | 1  | 0 | -3.115224 | 0.670925  | -2.489186 |
| 72 | 1  | 0 | -2.681853 | 2.207421  | -1.723904 |
| 73 | 6  | 0 | -4.930322 | -2.624159 | -0.026147 |
| 74 | 6  | 0 | -3.831891 | -2.917991 | -0.871090 |
| 75 | 7  | 0 | -3.144990 | -1.755317 | -1.131079 |
| 76 | 1  | 0 | -2.194989 | -1.707444 | -1.472369 |
| 77 | 1  | 0 | -4.052368 | 0.346206  | 2.329313  |
| 78 | 1  | 0 | -5.245280 | 1.634628  | 2.035842  |
| 79 | 1  | 0 | -6.166606 | -0.723209 | 1.895175  |
| 80 | 1  | 0 | -6.434593 | 0.194182  | 0.413767  |
| 81 | 6  | 0 | -5.828046 | -3.643103 | 0.358720  |
| 82 | 6  | 0 | -5.579562 | -4.923714 | -0.090775 |
| 83 | 6  | 0 | -4.459747 | -5.206548 | -0.917979 |
| 84 | 6  | 0 | -3.583286 | -4.225693 | -1.314089 |
| 85 | 8  | 0 | -6.344944 | -6.007879 | 0.197013  |
| 86 | 6  | 0 | -7.474747 | -5.799742 | 1.023571  |
| 87 | 1  | 0 | -7.946312 | -6.771396 | 1.138658  |
| 88 | 1  | 0 | -7.177145 | -5.418017 | 2.003803  |
| 89 | 1  | 0 | -8.177353 | -5.103775 | 0.557597  |
| 90 | 1  | 0 | -6.671525 | -3.411761 | 0.992792  |
| 91 | 1  | 0 | -4.325245 | -6.232957 | -1.231394 |
| 92 | 1  | 0 | -2.740757 | -4.455865 | -1.953217 |

### cis-exo-TS2-Si

Standard orientation:

| Center Number | Atomic Number | Atomic Type | Coordinates (Angstroms) |           |           |
|---------------|---------------|-------------|-------------------------|-----------|-----------|
|               |               |             | X                       | Y         | Z         |
| 1             | 6             | 0           | 6.122300                | -3.521945 | -0.371307 |
| 2             | 6             | 0           | 6.788646                | -2.276448 | -0.506429 |
| 3             | 6             | 0           | 6.021601                | -1.079413 | -0.460697 |
| 4             | 6             | 0           | 4.768232                | -3.570816 | -0.226226 |
| 5             | 6             | 0           | 3.983068                | -2.382464 | -0.189060 |
| 6             | 6             | 0           | 4.601589                | -1.136555 | -0.266792 |
| 7             | 8             | 0           | 2.652845                | -2.544967 | -0.076667 |
| 8             | 8             | 0           | 2.662731                | 0.007205  | -2.153304 |
| 9             | 6             | 0           | 3.864467                | 0.158777  | -0.077616 |
| 10            | 6             | 0           | 4.099512                | 0.912810  | 1.123483  |
| 11            | 6             | 0           | 3.560620                | 2.221320  | 1.266490  |
| 12            | 6             | 0           | 2.789387                | 2.768779  | 0.205537  |
| 13            | 6             | 0           | 3.056138                | 0.716383  | -1.078467 |
| 14            | 6             | 0           | 2.545074                | 2.043127  | -0.922099 |
| 15            | 1             | 0           | 6.707577                | -4.434449 | -0.397309 |

Imaginary frequency: -190.7999 cm<sup>-1</sup>

Electronic energy  $E = -4188.761583$  a.u.

Enthalpy  $H = -4188.715073$  a.u.

Entropy  $S = 269.734$  cal/mol/K

Gibbs free energy  $G = -4188.843232$  a.u.

Total free energy in solution  $E_{sol} = -4190.35956$  a.u.

|    |    |   |           |           |           |
|----|----|---|-----------|-----------|-----------|
| 16 | 1  | 0 | 4.237927  | -4.510390 | -0.138274 |
| 17 | 6  | 0 | 8.191581  | -2.210988 | -0.687298 |
| 18 | 6  | 0 | 6.713113  | 0.152288  | -0.618200 |
| 19 | 6  | 0 | 4.856078  | 0.386033  | 2.203461  |
| 20 | 6  | 0 | 3.793437  | 2.953706  | 2.455050  |
| 21 | 1  | 0 | 2.363933  | 3.759926  | 0.310551  |
| 22 | 1  | 0 | 1.933590  | 2.439343  | -1.723171 |
| 23 | 6  | 0 | 8.829999  | -1.006052 | -0.826061 |
| 24 | 6  | 0 | 8.073661  | 0.186389  | -0.795255 |
| 25 | 1  | 0 | 8.750557  | -3.139871 | -0.716567 |
| 26 | 1  | 0 | 9.902950  | -0.965123 | -0.965270 |
| 27 | 1  | 0 | 8.572067  | 1.140069  | -0.917878 |
| 28 | 1  | 0 | 6.146883  | 1.073529  | -0.608949 |
| 29 | 6  | 0 | 5.064164  | 1.118095  | 3.346427  |
| 30 | 6  | 0 | 4.532517  | 2.419225  | 3.479554  |
| 31 | 1  | 0 | 5.264443  | -0.611329 | 2.114454  |
| 32 | 1  | 0 | 5.643078  | 0.690684  | 4.155901  |
| 33 | 1  | 0 | 4.707566  | 2.986415  | 4.385017  |
| 34 | 1  | 0 | 3.372984  | 3.949848  | 2.536107  |
| 35 | 6  | 0 | -1.289952 | 3.952902  | -0.269265 |
| 36 | 6  | 0 | -2.418538 | 4.855617  | -0.602999 |
| 37 | 6  | 0 | -1.659440 | 2.773986  | 0.511560  |
| 38 | 6  | 0 | -3.039718 | 2.633075  | 1.059673  |
| 39 | 8  | 0 | -3.872297 | 3.757257  | 0.991494  |
| 40 | 8  | 0 | -0.160824 | 4.154980  | -0.695285 |
| 41 | 6  | 0 | -0.845993 | 1.674881  | 0.479559  |
| 42 | 6  | 0 | -1.221994 | 0.417202  | 1.007882  |
| 43 | 1  | 0 | -2.979668 | 2.394520  | 2.124331  |
| 44 | 1  | 0 | 0.073256  | 1.756949  | -0.093695 |
| 45 | 6  | 0 | -0.649811 | -0.787181 | 0.551522  |
| 46 | 8  | 0 | -0.076219 | -0.908448 | -0.577661 |
| 47 | 1  | 0 | -1.830140 | 0.335772  | 1.899036  |
| 48 | 8  | 0 | -0.877222 | -1.847349 | 1.313643  |
| 49 | 6  | 0 | -0.377588 | -3.122877 | 0.870205  |
| 50 | 1  | 0 | 0.710805  | -3.113560 | 0.827356  |
| 51 | 1  | 0 | -0.794834 | -3.371327 | -0.105495 |
| 52 | 1  | 0 | -0.729935 | -3.831167 | 1.612796  |
| 53 | 6  | 0 | -3.661099 | 4.690353  | 0.009158  |
| 54 | 6  | 0 | -2.252505 | 5.875742  | -1.543279 |
| 55 | 6  | 0 | -3.307238 | 6.714206  | -1.865007 |
| 56 | 6  | 0 | -4.542815 | 6.536837  | -1.236967 |
| 57 | 6  | 0 | -4.726910 | 5.529581  | -0.299477 |
| 58 | 1  | 0 | -5.673126 | 5.382150  | 0.203002  |
| 59 | 1  | 0 | -5.370769 | 7.190512  | -1.480270 |
| 60 | 1  | 0 | -3.175870 | 7.502404  | -2.593986 |
| 61 | 1  | 0 | -1.275933 | 5.981104  | -1.997554 |
| 62 | 30 | 0 | 1.797439  | -1.195979 | -1.000477 |
| 63 | 6  | 0 | -3.684900 | -0.792096 | -0.301418 |
| 64 | 7  | 0 | -3.812145 | 1.423238  | 0.530401  |
| 65 | 6  | 0 | -3.251198 | 0.579082  | -0.342745 |
| 66 | 6  | 0 | -2.654914 | 1.060921  | -1.637970 |
| 67 | 6  | 0 | -4.807757 | -1.226358 | 0.362478  |
| 68 | 6  | 0 | -4.650123 | 0.856497  | 1.607318  |
| 69 | 6  | 0 | -5.613027 | -0.220677 | 1.119050  |
| 70 | 1  | 0 | -1.676616 | 0.611556  | -1.815999 |
| 71 | 1  | 0 | -3.338231 | 0.728122  | -2.423958 |
| 72 | 1  | 0 | -2.577208 | 2.140237  | -1.689129 |
| 73 | 6  | 0 | -4.955842 | -2.611430 | 0.059429  |
| 74 | 6  | 0 | -3.875826 | -2.951884 | -0.789608 |
| 75 | 7  | 0 | -3.135328 | -1.818391 | -1.034788 |
| 76 | 1  | 0 | -2.219526 | -1.790840 | -1.457161 |
| 77 | 1  | 0 | -3.992238 | 0.417745  | 2.368017  |

|    |   |   |           |           |           |
|----|---|---|-----------|-----------|-----------|
| 78 | 1 | 0 | -5.184442 | 1.697921  | 2.047387  |
| 79 | 1 | 0 | -6.104187 | -0.661543 | 1.988100  |
| 80 | 1 | 0 | -6.392191 | 0.214813  | 0.485776  |
| 81 | 6 | 0 | -5.897921 | -3.589917 | 0.438774  |
| 82 | 6 | 0 | -5.714352 | -4.878012 | -0.024313 |
| 83 | 6 | 0 | -4.615999 | -5.206805 | -0.859815 |
| 84 | 6 | 0 | -3.694727 | -4.263455 | -1.249477 |
| 85 | 8 | 0 | -6.532142 | -5.926513 | 0.259162  |
| 86 | 6 | 0 | -7.645832 | -5.669757 | 1.092692  |
| 87 | 1 | 0 | -8.165378 | -6.617574 | 1.201419  |
| 88 | 1 | 0 | -7.326048 | -5.312448 | 2.075254  |
| 89 | 1 | 0 | -8.315267 | -4.934962 | 0.637358  |
| 90 | 1 | 0 | -6.727061 | -3.324434 | 1.078591  |
| 91 | 1 | 0 | -4.532359 | -6.234914 | -1.185009 |
| 92 | 1 | 0 | -2.867417 | -4.527674 | -1.895581 |

---

**S6: Reference 24 details.**

23. M. J. Frisch, G. W. Trucks, H. B. Schlegel, G. E. Scuseria, M. A. Robb, J. R. Cheeseman, G. Scalmani, V. Barone, B. Mennucci, G. A. Petersson, H. Nakatsuji, M. Caricato, X. Li, H. P. Hratchian, A. F. Izmaylov, J. Bloino, G. Zheng, J. L. Sonnenberg, M. Hada, M. Ehara, K. Toyota, R. Fukuda, J. Hasegawa, M. Ishida, T. Nakajima, Y. Honda, O. Kitao, H. Nakai, T. Vreven, J. A. Montgomery, Jr., J. E. Peralta, F. Ogliaro, M. Bearpark, J. J. Heyd, E. Brothers, K. N. Kudin, V. N. Staroverov, R. Kobayashi, J. Normand, K. Raghavachari, A. Rendell, J. C. Burant, S. S. Iyengar, J. Tomasi, M. Cossi, N. Rega, J. M. Millam, M. Klene, J. E. Knox, J. B. Cross, V. Bakken, C. Adamo, J. Jaramillo, R. Gomperts, R. E. Stratmann, O. Yazyev, A. J. Austin, R. Cammi, C. Pomelli, J. W. Ochterski, R. L. Martin, K. Morokuma, V. G. Zakrzewski, G. A. Voth, P. Salvador, J. J. Dannenberg, S. Dapprich, A. D. Daniels, O. Farkas, J. B. Foresman, J. V. Ortiz, J. Cioslowski, and D. J. Fox, Gaussian, Inc., Wallingford CT, 2009.
